# Supplementary material for: Structure–Activity Studies with Bis-Amidines That Potentiate Gram-Positive Specific Antibiotics against Gram-Negative Pathogens
Source: PubMed Central journal article supplement — ACS Infect Dis. 2021 Nov 12;7(12):3314–35. doi: 10.1021/acsinfecdis.1c00466 (PMC8669655; doi:10.1021/acsinfecdis.1c00466), 2021-11-12
Supplement: id1c00466_si_001.pdf [file id1c00466_si_001.pdf]

Supporting information for:

# Structure-activity studies with bis-amidines that potentiate Gram-positive specific antibiotics against Gram-negative pathogens

Charlotte M.J. Wesseling,<sup>a</sup> Cornelis J. Slingerland,<sup>a</sup> Shanice Veraar,<sup>a</sup> Samantha Lok,<sup>a</sup> and Nathaniel I. Martin<sup>a,\*</sup>

<sup>a</sup>*Biological Chemistry Group, Institute of Biology Leiden, Leiden University, 2333 BE Leiden, The Netherlands.*

\*n.i.martin@biology.leidenuniv.nl

## Table of contents

|                                                                                                                      |      |
|----------------------------------------------------------------------------------------------------------------------|------|
| Abbreviations                                                                                                        | S3   |
| General notes                                                                                                        | S4   |
| Synthesis                                                                                                            | S5   |
| Synergy data of compounds and PMBN against <i>E.coli</i> BW25113<br>with erythromycin                                | S9   |
| with rifampicin                                                                                                      | S13  |
| Synergy data of <b>1, 3, 21, 22, 23b, 37, 38, 43, 44</b> , and PMBN against <i>E.coli</i> BW25113<br>with novobiocin | S17  |
| with vancomycin                                                                                                      | S19  |
| Synergy data of <b>1, 3, 21, 22, 23b, 37, 38, 43, 44</b> , and PMBN with rifampicin<br><i>E.coli</i> ATCC25922       | S21  |
| <i>E.coli</i> W3110                                                                                                  | S23  |
| <i>E.coli</i> 552060.1                                                                                               | S25  |
| <i>E.coli</i> BW25113 mcr-1                                                                                          | S27  |
| <i>E.coli</i> mcr-1                                                                                                  | S29  |
| <i>E.coli</i> EQASmcr-1 (=EQAS 2016 412016126)                                                                       | S31  |
| <i>E.coli</i> EQASmcr-2 (=EQAS 2016 KP37)                                                                            | S33  |
| <i>E.coli</i> EQASmcr-3 (=EQAS 2017 2013-SQ352)                                                                      | S35  |
| <i>E.coli</i> RC00089                                                                                                | S37  |
| <i>A. baumannii</i> ATCC17978                                                                                        | S39  |
| <i>K. pneumoniae</i> ATCC13883                                                                                       | S41  |
| <i>P. aeruginosa</i> ATCC27853                                                                                       | S43  |
| Hemolysis assay of compounds                                                                                         | S45  |
| Outer membrane permeability assay using NPN                                                                          | S48  |
| Compound characterization and analysis<br>HRMS data                                                                  | S49  |
| NMR data                                                                                                             | S51  |
| HPLC traces of the final compounds                                                                                   | S108 |
| Sources of bacterial strains                                                                                         | S133 |
| References                                                                                                           | S134 |

## Abbreviations

|                          |                                   |
|--------------------------|-----------------------------------|
| ACS                      | American Chemical Society         |
| $\text{CBr}_4$           | Carbon tetrabromide               |
| $\text{CDCl}_3$          | Deuterated chloroform             |
| EtOAc                    | Ethyl acetate                     |
| EtOH                     | Ethanol                           |
| $\text{H}_2\text{SO}_4$  | Sulfuric acid                     |
| HCl                      | Hydrogen chloride                 |
| MeOH                     | Methanol                          |
| MIC                      | Minimal inhibitory concentration  |
| MSC                      | Minimal synergistic concentration |
| $\text{Na}_2\text{SO}_4$ | Sodium sulfate                    |
| $\text{PPh}_3$           | Triphenylphosphine                |

## General notes

General procedures. All reagents employed were of American Chemical Society (ACS) grade or finer and were used without further purification unless otherwise stated. For compound characterization,  $^1\text{H}$  NMR spectra were recorded at 400 MHz with chemical shifts reported in parts per million (ppm) downfield relative to  $\text{CHCl}_3$  (7.26) or DMSO ( $\delta$  2.50).  $^1\text{H}$  NMR data are reported in the following order: multiplicity (s, singlet; d, doublet; t, triplet; q, quartet and m, multiplet), coupling constant (J) in hertz (Hz) and the number of protons. Where appropriate, the multiplicity is preceded by br, indicating that the signal was broad.  $^{13}\text{C}$  NMR spectra were recorded at 101 MHz with chemical shifts reported relative to  $\text{CDCl}_3$  ( $\delta$  77.16) or DMSO ( $\delta$  39.52). HRMS analysis was performed on a Shimadzu Nexera X2 UHPLC system with a Waters Acquity HSS C18 column (2.1  $\times$  100 mm, 1.8  $\mu\text{m}$ ) at 30  $^\circ\text{C}$  and equipped with a diode array detector. The following solvent system, at a flow rate of 0.5 mL/min, was used: solvent A, 0.1 % formic acid in water; solvent B, 0.1 % formic acid in acetonitrile. Gradient elution was as follows: 95:5 (A/B) for 1 min, 95:5 to 15:85 (A/B) over 6 min, 15:85 to 0:100 (A/B) over 1 min, 0:100 (A/B) for 3 min, then reversion back to 95:5 (A/B) for 3 min. This system was connected to a Shimadzu 9030 QTOF mass spectrometer (ESI ionisation) calibrated internally with Agilent's API-TOF reference mass solution kit (5.0 mM purine, 100.0 mM ammonium trifluoroacetate and 2.5 mM hexakis(1H,1H,3H-tetrafluoropropoxy)phosphazine) diluted to achieve a mass count of 10000. Compounds **1**, **45**, **47**, and **48** had NMR spectra and mass spectra consistent with the assigned structures in literature.<sup>1-4</sup> Purity of the final compounds **1**, **2**, **3**, **9**, **10**, **11**, **12**, **15**, **16**, **21**, **22**, **23**, **24**, **1b**, **21b**, **22b**, **23b**, **1c**, **21c**, **22c**, **23c**, **37**, **38**, **43**, and **44** was confirmed to be  $\geq 95\%$  by analytical RP-HPLC using a Shimadzu Prominence-i LC-2030 system with a Dr. Maisch Reprosil Gold 120 C18 column (4.6  $\times$  250 mm, 5  $\mu\text{m}$ ) at 30  $^\circ\text{C}$  and equipped with a UV detector monitoring at 214 nm. The following solvent system, at a flow rate of 1 mL/min, was used: solvent A, 0.1 % TFA in water/acetonitrile, 95/5; solvent B, 0.1 % TFA in water/acetonitrile, 5/95. Gradient elution was as follows: 95:5 (A/B) for 2 min, 95:5 to 0:100 (A/B) over 30 min, 0:100 (A/B) for 1 min, then reversion back to 95:5 (A/B) over 1 min, 95:5 (A/B) for 3 min. The compounds were purified via preparative HPLC using a BESTA-Technik system with a Dr. Maisch Reprosil Gold 120 C18 column (25  $\times$  250 mm, 10  $\mu\text{m}$ ) and equipped with a ECOM Flash UV detector monitoring at 214 nm. The following solvent system, at a flow rate of 12 mL/min, was used: solvent A, 0.1 % TFA in water/acetonitrile 95/5; solvent B, 0.1 % TFA in water/acetonitrile 5/95. Unless stated otherwise in the protocol, the gradient elution was as follows: 100:0 (A/B) to 0:100 (A/B) over 25 min, 0:100 (A/B) for 3 min, then reversion back to 100:0 (A/B) over 1 min, 100:0 (A/B) for 1 min.

## Synthesis

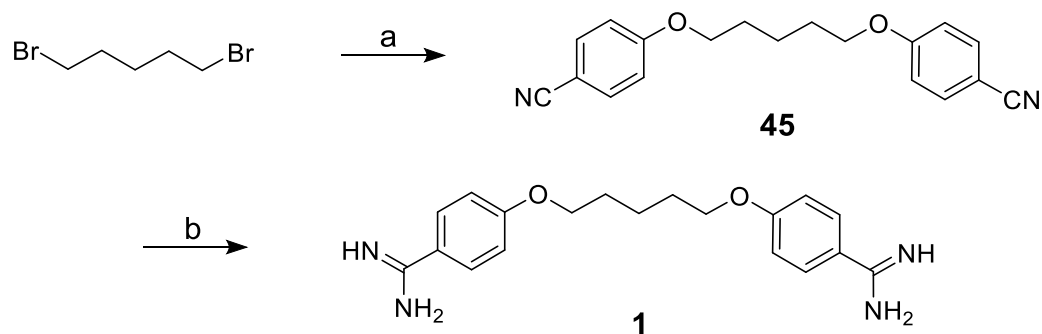

**Scheme S1** Synthesis of pentamidine (**1**). Reagents and conditions: (a) 4-Cyanophenol, NaH, DMF, 80°C, 1h (78%); (b) i) LHMDS, THF, 48h, rt, ii) 4M HCl (dioxane), 0°C to rt, overnight (quant.).

### 4,4'-(pentane-1,5-diylbis(oxy))dibenzonitrile (**45**)

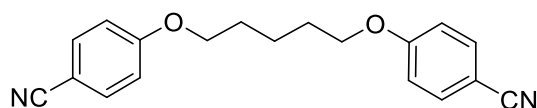

4-cyanophenol (1.14 g, 9.6 mmol, 2.4 eq.) was suspended in dry DMF (12 mL) under argon atmosphere. The suspension was cooled to 0 °C using an ice bath and NaH (384 mg, 60% dispersion in mineral oil, 2.4 eq.) was slowly added. The reaction was stirred until a clear solution appeared, the ice bath was removed and 1,5-dibromopentane (0.92 g, 4.0 mmol) was added. The reaction mixture was heated to 80 °C for 1 hour and then cooled to room temperature. Water (35 mL) was added to the mixture to obtain precipitation. The precipitate was filtered, washed with water and recrystallized from EtOH to give compound **45** as white crystals (0.95 g, 78%). <sup>1</sup>H NMR (400 MHz, CDCl<sub>3</sub>) δ 7.57 (d, *J* = 8.9 Hz, 4H), 6.93 (d, *J* = 8.9 Hz, 4H), 4.03 (t, *J* = 6.3 Hz, 4H), 1.93 – 1.84 (m, 4H), 1.72 – 1.61 (m, 2H). <sup>13</sup>C NMR (101 MHz, CDCl<sub>3</sub>) δ 162.37, 134.09, 119.36, 115.24, 103.91, 68.14, 28.81, 22.73.

### 4,4'-(pentane-1,5-diylbis(oxy))dibenzimidamide (**1**)

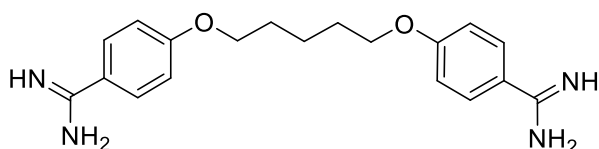

Compound **45** (94 mg, 0.3 mmol) was dissolved in dry THF (2 mL) under argon atmosphere and LHMDS (1.2 mL, 1 M THF solution, 4.0 eq.) was added. The reaction was stirred at room temperature for 48 hours or longer until complete conversion to the bis-amidine (monitored by LCMS). The solution was cooled to 0 °C and quenched with HCl (4.5 mL, 4 M dioxane solution, 60 eq.). The mixture was stirred at room temperature overnight, then diluted with diethyl ether and filtered. The precipitate was purified by preparative HPLC with the gradient 0-100% in 30 minutes. The samples were analyzed and the combined pure fractions were dried to give pentamidine (**1**) (120 mg, quant.). <sup>1</sup>H NMR (400 MHz, DMSO-*d*<sub>6</sub>) δ 9.14 (s, 3H), 9.06 (s, 3H), 7.81 (d, *J* = 8.9 Hz, 4H), 7.15 (d, *J* = 8.9 Hz, 4H), 4.12 (t, *J* = 6.4 Hz, 4H), 1.88 – 1.75 (m, 4H), 1.65 – 1.52 (m, 2H). <sup>13</sup>C NMR (101 MHz, DMSO) δ 164.70, 163.06, 130.19, 119.50, 114.79, 68.05, 28.21, 22.09. HRMS (ESI): calculated for C<sub>19</sub>H<sub>24</sub>N<sub>4</sub>O<sub>2</sub> [M+H]<sup>+</sup> 341.1977, found 341.1977.

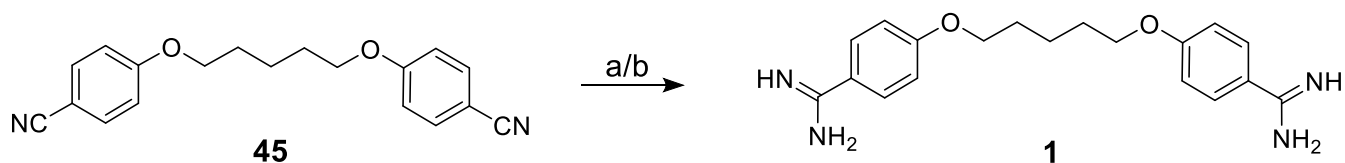

**Scheme S2** Exploration of the optimal acidic quench. Reagents and conditions: (a) i) LHMDS, THF, 48h, ii) 2M HCl (aq), 0°C to rt, overnight (68%) or (b) i) LHMDS, THF, 48h, ii) sat. ethanolic HCl, 0°C to rt, overnight (9%).

**4,4'-(pentane-1,5-diylbis(oxy))dibenzimidamide (1) using 2M HCl (aq)**

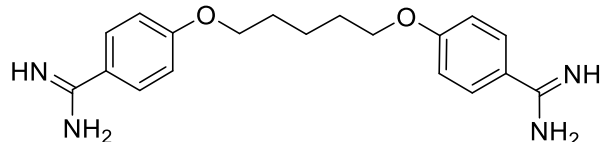

Following the procedure as described for compound 1 except for using 2 M HCl (aq) (20 mL) as acidic quench afforded pentamidine (1) (71 mg, 68%). <sup>1</sup>H NMR (400 MHz, DMSO-*d*<sub>6</sub>) δ 9.14 (s, 4H), 9.06 (s, 4H), 7.81 (d, J = 8.9 Hz, 4H), 7.15 (d, J = 8.9 Hz, 4H), 4.12 (t, J = 6.4 Hz, 4H), 1.88 – 1.75 (m, 4H), 1.65 – 1.52 (m, 2H). <sup>13</sup>C NMR (101 MHz, DMSO) δ 164.70, 163.06, 130.19, 119.50, 114.79, 68.05, 28.21, 22.09. HRMS (ESI): calculated for C<sub>19</sub>H<sub>24</sub>N<sub>4</sub>O<sub>2</sub> [M+H]<sup>+</sup> 341.1977, found 341.1977.

**4,4'-(pentane-1,5-diylbis(oxy))dibenzimidamide (1) using sat. ethanolic HCl**

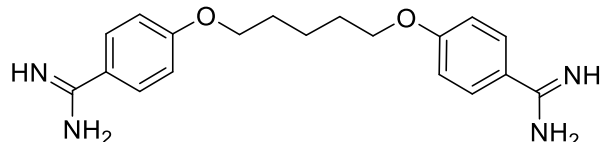

Following the procedure as described for compound 1 except for using freshly prepared sat. ethanolic HCl (20 mL) as acidic quench afforded pentamidine (1) (9 mg, 9%). <sup>1</sup>H NMR (400 MHz, DMSO-*d*<sub>6</sub>) δ 9.14 (s, 4H), 9.06 (s, 4H), 7.81 (d, J = 8.9 Hz, 4H), 7.15 (d, J = 8.9 Hz, 4H), 4.12 (t, J = 6.4 Hz, 4H), 1.88 – 1.75 (m, 4H), 1.65 – 1.52 (m, 2H). <sup>13</sup>C NMR (101 MHz, DMSO) δ 164.70, 163.06, 130.19, 119.50, 114.79, 68.05, 28.21, 22.09. HRMS (ESI): calculated for C<sub>19</sub>H<sub>24</sub>N<sub>4</sub>O<sub>2</sub> [M+H]<sup>+</sup> 341.1977, found 341.1977.

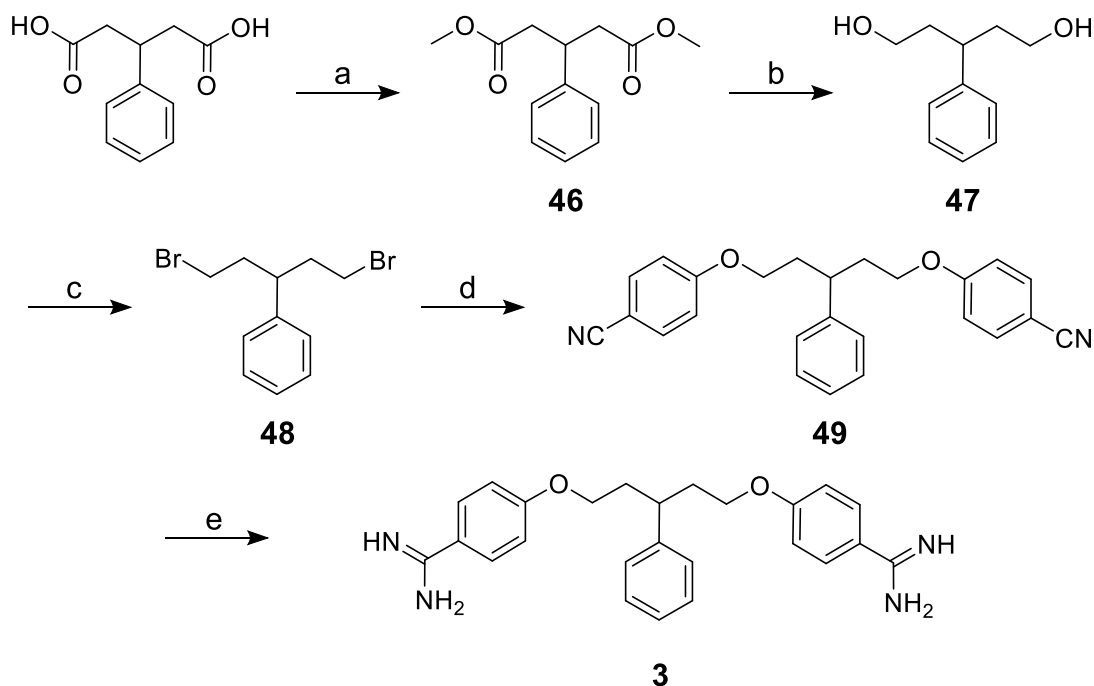

**Scheme S3** Synthesis of 4,4'-((3-phenylpentane-1,5-diyl)bis(oxy))dibenzimidamide (3). Reagents and conditions: (a) H<sub>2</sub>SO<sub>4</sub>, MeOH, 70°C, overnight (91%); (b) DIBAL-H, DCM, 0°C, 1 hour (quant.); (c)

NBS, PPh<sub>3</sub>, DCM, 0°C to rt, 2 hours (62%) (d) 4-Cyanophenol, NaH, DMF, 80°C, 1h (89%); (e) i) LHMDS, THF, 48h, ii) 4M HCl (dioxane), 0°C to rt, overnight (23%).

#### Dimethyl 3-phenylpentanedioate (46)

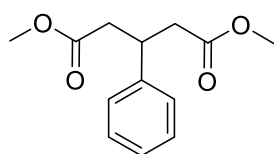

3-phenylpentanedioic acid (1.04 g, 5 mmol) was dissolved in MeOH (20 mL) and a few drops of H<sub>2</sub>SO<sub>4</sub> were added to the solution. The reaction mixture was refluxed at 70 °C overnight, concentrated in vacuo and redissolved in DCM (50 mL). The organic layer was washed with water (4 mL) five times. The organic layer was then washed with brine, dried over Na<sub>2</sub>SO<sub>4</sub> and concentrated in vacuo. The crude product was purified using column chromatography (petroleum ether/EtOAc = 17:3) to give dimethyl ester **46** (1.08 g, 92%). <sup>1</sup>H NMR (400 MHz, CDCl<sub>3</sub>) δ 7.33 – 7.26 (m, 2H), 7.25 – 7.18 (m, 3H), 3.70 – 3.61 (m, 1H), 3.59 (s, 6H), 2.73 (dd, J = 15.6, 7.2 Hz, 2H), 2.65 (dd, J = 15.6, 7.9 Hz, 2H). <sup>13</sup>C NMR (101 MHz, CDCl<sub>3</sub>) δ 172.19, 142.67, 128.74, 127.28, 127.10, 51.75, 40.53, 38.36.

#### 3-phenylpentane-1,5-diol (47)

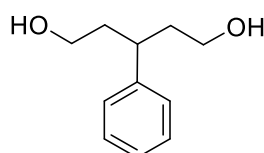

Dimethyl ester **46** (1.07 mg, 4.5 mmol) was dissolved in dry DCM (12.5 mL) under argon atmosphere. The mixture was cooled to 0 °C using an ice bath. DIBAL-H (21.7 mL, 1M dioxane solution, 4.8 eq.) was added dropwise to the cooled solution and stirred for 1 hour. The reaction was quenched with Rochelle salt (30 mL, sat. aq.) and the biphasic mixture was stirred at room temperature overnight. The layers were separated and the aqueous layer was extracted two times with diethyl ether. The organic layers were combined, washed with water and brine, dried over Na<sub>2</sub>SO<sub>4</sub> and concentrated in vacuo. The diol **47** (863 mg, quant.) was used in the next step without further purification. <sup>1</sup>H NMR (400 MHz, CDCl<sub>3</sub>) δ 7.34 – 7.27 (m, 2H), 7.24 – 7.15 (m, 3H), 3.62 – 3.52 (m, 2H), 3.52 – 3.43 (m, 2H), 2.98 – 2.84 (m, 1H), 2.01 – 1.79 (m, 4H). <sup>13</sup>C NMR (101 MHz, CDCl<sub>3</sub>) δ 144.48, 128.80, 127.73, 126.63, 61.04, 39.55, 38.94.

#### (1,5-dibromopentan-3-yl)benzene (48)

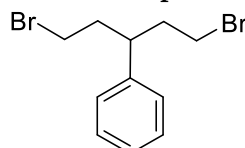

Compound **47** (400 mg, 2.2 mmol) was dissolved in dry DCM (10 mL), PPh<sub>3</sub> (1.46 g, 5.5 mmol, 2.5 eq.) was added, and the mixture under argon was cooled to 0 °C using an ice bath. N-bromosuccinimide (0.65 g, 5.5 mmol, 2.5 eq.) was added portion wise. After the addition, the ice bath was removed and the reaction was stirred at room temperature for 2 hours. The reaction mixture was concentrated under reduced pressure and the crude product was purified by column chromatography (petroleum ether/EtOAc = 99:1) to give compound **48** (415 mg, 62%). <sup>1</sup>H NMR (400 MHz, CDCl<sub>3</sub>) δ 7.34 – 7.33 (m, 3H), 7.22 – 7.16 (m, 2H), 3.28 (ddd, J = 10.0, 6.6, 5.5 Hz, 2H), 3.21 – 2.94 (m, 3H), 2.20 – 2.13 (m, 4H). <sup>13</sup>C NMR (101 MHz, CDCl<sub>3</sub>) (including PPh<sub>3</sub>=O peaks) δ 134.00, 133.81, 132.37, 132.27, 129.09, 129.05, 128.78, 128.74, 128.67, 127.88, 127.23, 42.79, 39.34, 31.54.

#### 4,4'-((3-phenylpentane-1,5-diyl)bis(oxy))dibenzonitrile (49)

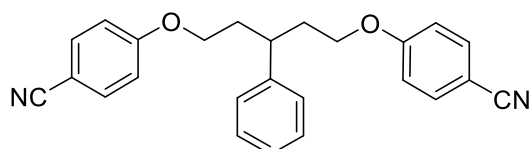

Following the procedure as described above for compound **45**, using compound **48** (500 mg, 1.6 mmol), afforded crude compound **49** (546 mg, 89%). The crude product was used in the next step without further purification. <sup>1</sup>H NMR (400 MHz, CDCl<sub>3</sub>) δ 7.51 – 7.40 (m, 5H), 7.24 – 7.24 (m, 2H), 7.12 – 7.08 (m, 2H), 6.82 – 6.67 (m, 4H), 3.81 (ddd, J = 9.4, 6.6, 4.9 Hz, 2H), 3.72 (ddd, J = 9.4, 8.1, 6.0 Hz, 2H), 3.11 – 2.96 (m, 1H), 2.24 – 2.12 (m, 2H), 2.09 – 1.98 (m, 2H). <sup>13</sup>C NMR (101 MHz, CDCl<sub>3</sub>) δ 162.23, 142.69, 137.35, 137.24, 134.08, 133.96, 133.77, 128.84, 128.66, 128.59, 127.69, 127.13, 119.34, 115.25, 104.02, 66.21, 39.00, 36.00, 29.84.

### 4,4'-((3-phenylpentane-1,5-diyl)bis(oxy))dibenzimidamide (3)

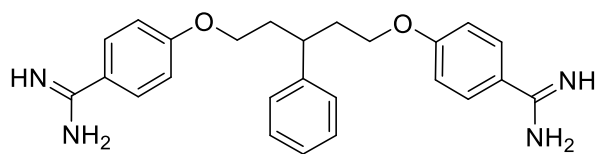

Compound **49** (109 mg, 0.28 mmol) was dissolved in the LHMDS solution (1.1 mL, 1 M THF solution, 4.0 eq.) under argon atmosphere. The reaction was stirred at room temperature for 48 hours or longer until complete conversion to the

bis-amidine (monitored by LCMS). The solution was cooled to 0 °C and quenched with HCl (4.5 mL, 4 M dioxane solution, 60 eq.). The mixture was stirred at room temperature overnight, then diluted with diethyl ether and filtered. The precipitate was purified by preparative HPLC with the gradient 20-100% in 30 minutes. The samples were analyzed and the combined pure fractions were dried to give compound **3** (27.4 mg, 23%). <sup>1</sup>H NMR (400 MHz, DMSO-*d*<sub>6</sub>) δ 9.11 (d, J = 12.6 Hz, 8H), 7.77 (d, J = 8.9 Hz, 4H), 7.34 – 7.16 (m, 5H), 7.05 (d, J = 9.0 Hz, 4H), 4.00 – 3.90 (m, 2H), 3.83 (dd, J = 15.0, 8.9 Hz, 2H), 3.14 – 3.04 (m, 1H), 2.29 – 2.16 (m, 2H), 2.13 – 2.00 (m, 2H). <sup>13</sup>C NMR (101 MHz, DMSO) δ 164.81, 162.92, 143.38, 130.21, 128.62, 127.69, 126.58, 119.64, 66.21, 38.31, 35.10. HRMS (ESI): calculated for C<sub>25</sub>H<sub>28</sub>N<sub>4</sub>O<sub>2</sub> [M+H]<sup>+</sup> 417.2291, found 417.2287.



## Checkerboard assays and FICI data against *E.coli* BW25113 with erythromycin

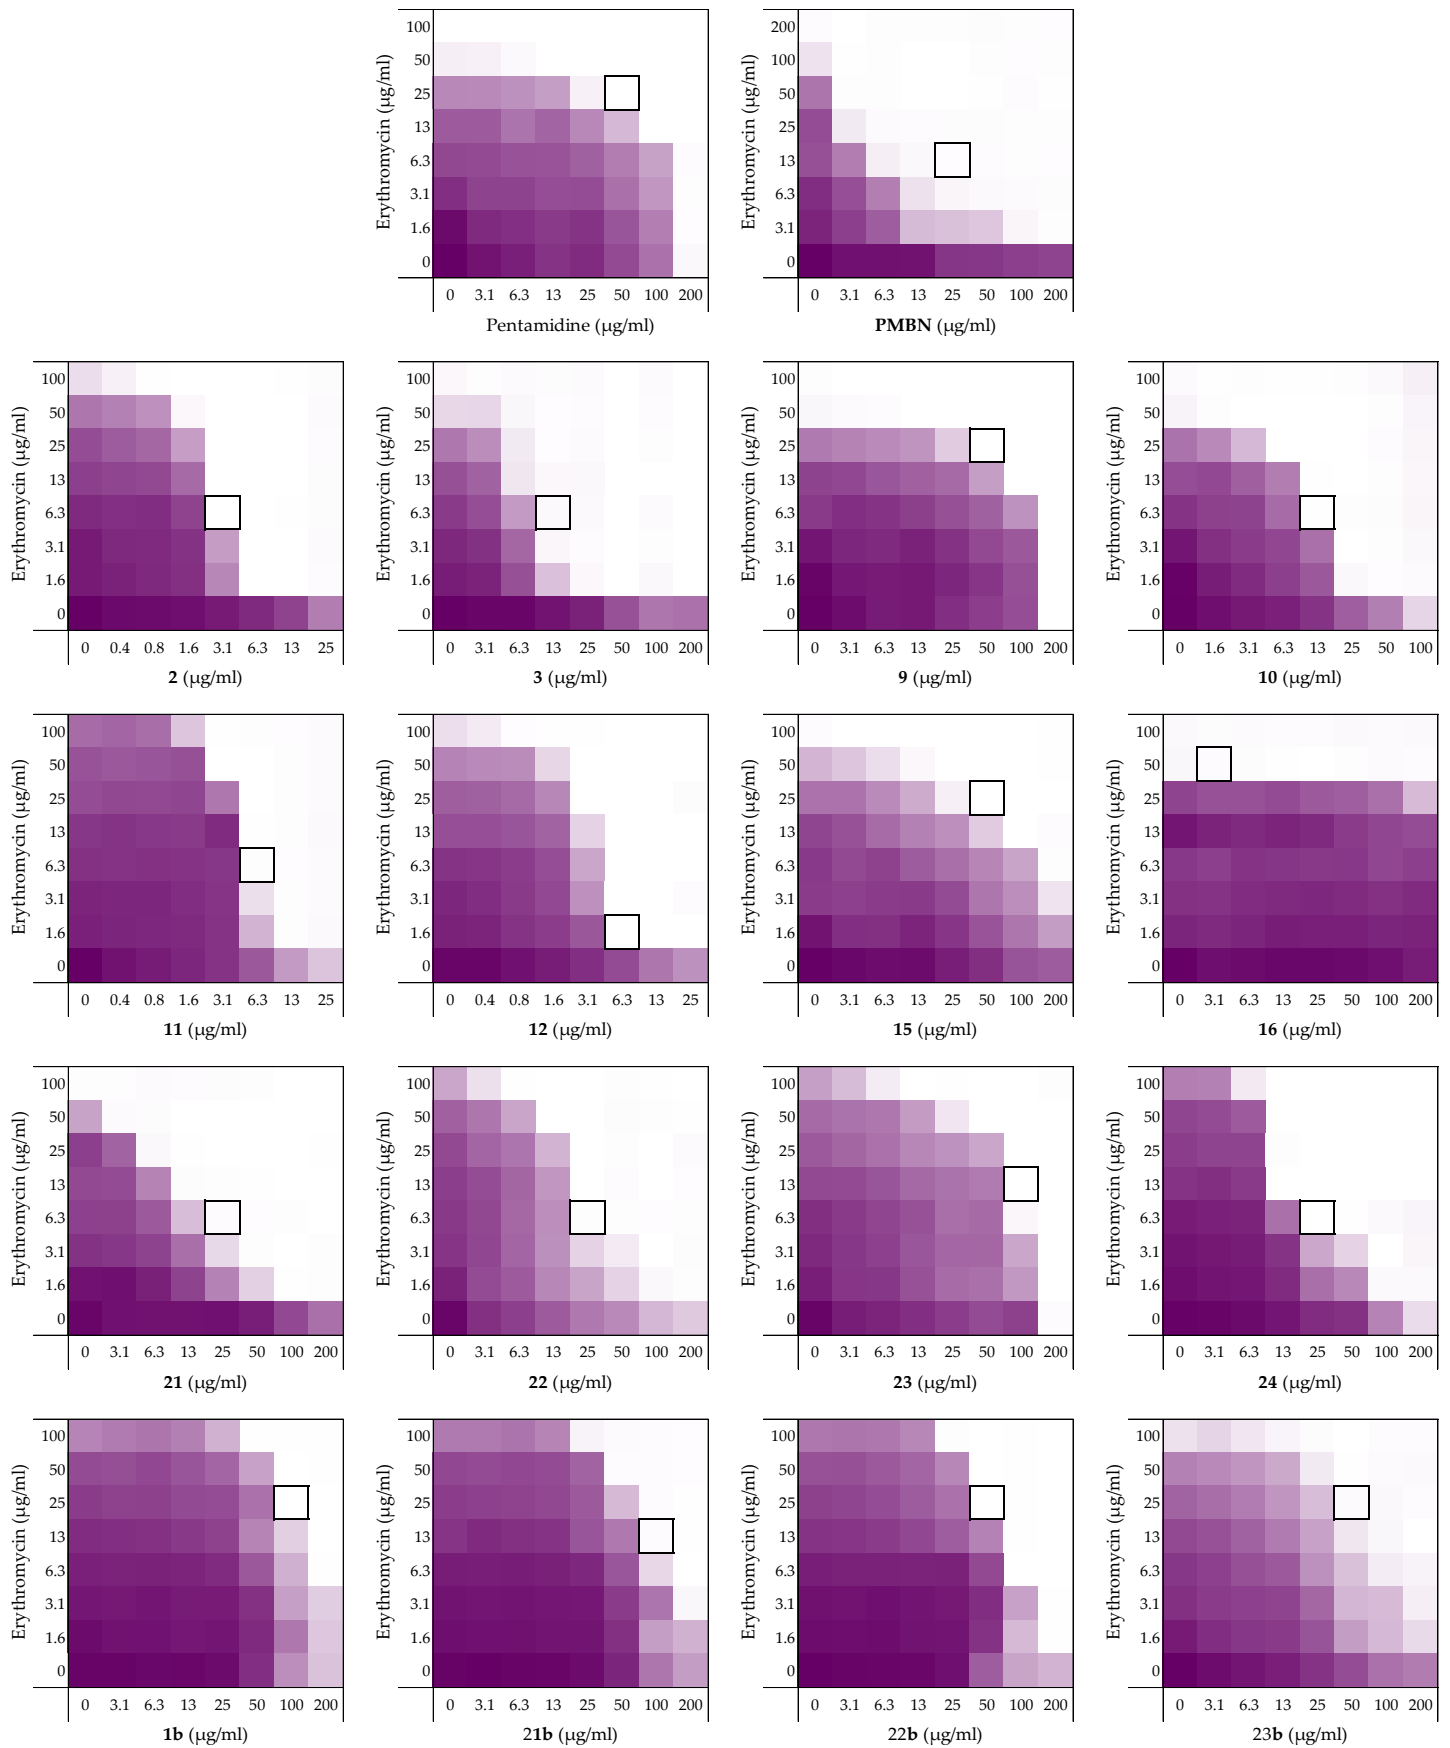

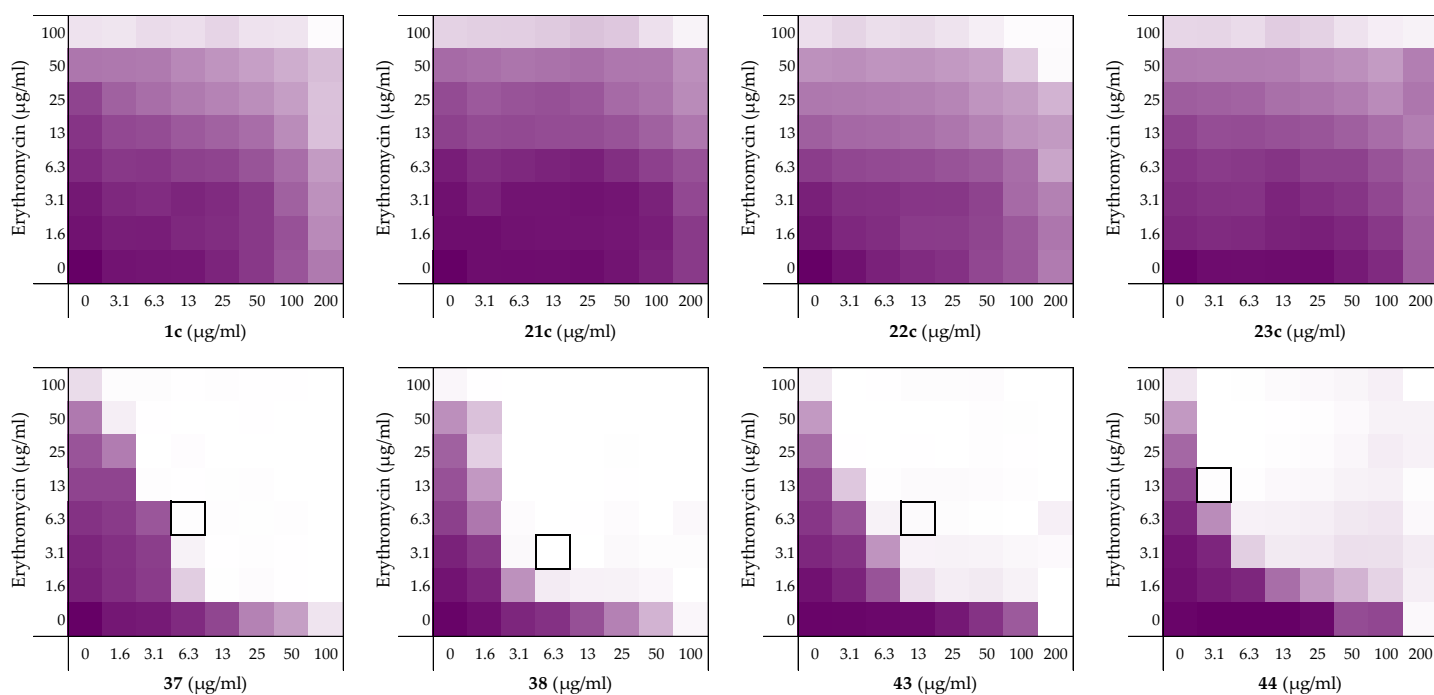

**Figure S1** Checkerboard assays of the compounds and PMBN in combination with erythromycin versus *E. coli* BW25113. OD600 values were measured using a plate reader and transformed to a gradient: purple represents growth, white represents no growth. In each case, the bounded box in the checkerboard assays indicates the minimal synergistic concentration (MSC) of compound and antibiotic resulting in the lowest FICI.

**Table S1** Synergistic data of compounds and PMBN of the checkerboard assays with erythromycin as shown in Figure S1. All minimal inhibitory concentrations (MICs) and minimal synergistic concentrations (MSCs) are in  $\mu\text{g/mL}$ .

|     | Structures | MIC  | MSC  | MIC ery | MSC ery | FICI         |
|-----|------------|------|------|---------|---------|--------------|
| 1   |            | 200  | 50   | 100     | 25      | 0.500        |
| 2   |            | >25  | 3.13 | >100    | 6.25    | $\leq 0.094$ |
| 3   |            | >200 | 12.5 | >100    | 6.25    | $\leq 0.063$ |
| 9   |            | 200  | 50   | 100     | 25      | 0.500        |
| 10  |            | >100 | 12.5 | 100     | 6.25    | $\leq 0.125$ |
| 11  |            | >25  | 6.25 | >100    | 6.25    | $\leq 0.156$ |
| 12  |            | >25  | 6.25 | >100    | 1.56    | $\leq 0.133$ |
| 15  |            | >200 | 50   | 100     | 25      | $\leq 0.375$ |
| 16  |            | >200 | 3.13 | 50      | 50      | $> 0.5^a$    |
| 21  |            | >200 | 25   | 100     | 6.25    | $\leq 0.125$ |
| 22  |            | >200 | 25   | >100    | 6.25    | $\leq 0.094$ |
| 23  |            | >200 | 100  | >100    | 12.5    | $\leq 0.313$ |
| 24  |            | >200 | 25   | >100    | 6.25    | $\leq 0.094$ |
| 1b  |            | >200 | 100  | >100    | 25      | $\leq 0.375$ |
| 21b |            | >200 | 100  | >100    | 12.5    | $\leq 0.313$ |

|             |                                                                                     |      |      |      |      |                   |
|-------------|-------------------------------------------------------------------------------------|------|------|------|------|-------------------|
| <b>22b</b>  | 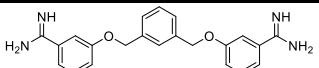   | >200 | 50   | >100 | 25   | $\leq 0.250$      |
| <b>23b</b>  |    | >200 | 50   | >100 | 25   | $\leq 0.250$      |
| <b>1c</b>   |    | >200 | nd.  | >100 | nd.  | >0.5 <sup>a</sup> |
| <b>21c</b>  |    | >200 | nd.  | >100 | nd.  | >0.5 <sup>a</sup> |
| <b>22c</b>  |    | >200 | nd.  | >100 | nd.  | >0.5 <sup>a</sup> |
| <b>23c</b>  |    | >200 | nd.  | >100 | nd.  | >0.5 <sup>a</sup> |
| <b>37</b>   |    | >100 | 6.25 | >100 | 6.25 | $\leq 0.063$      |
| <b>38</b>   |   | >100 | 6.25 | >100 | 3.13 | $\leq 0.047$      |
| <b>43</b>   |  | 200  | 12.5 | >100 | 6.25 | $\leq 0.094$      |
| <b>44</b>   |  | 200  | 3.13 | >100 | 12.5 | $\leq 0.078$      |
| <b>PMBN</b> |                                                                                     | >200 | 25   | 200  | 12.5 | $\leq 0.125$      |

<sup>a</sup> Synergy is defined as FICI  $\leq 0.5$ .<sup>5</sup>

## Checkerboard assays and FICI data against *E.coli* BW25113 with rifampicin

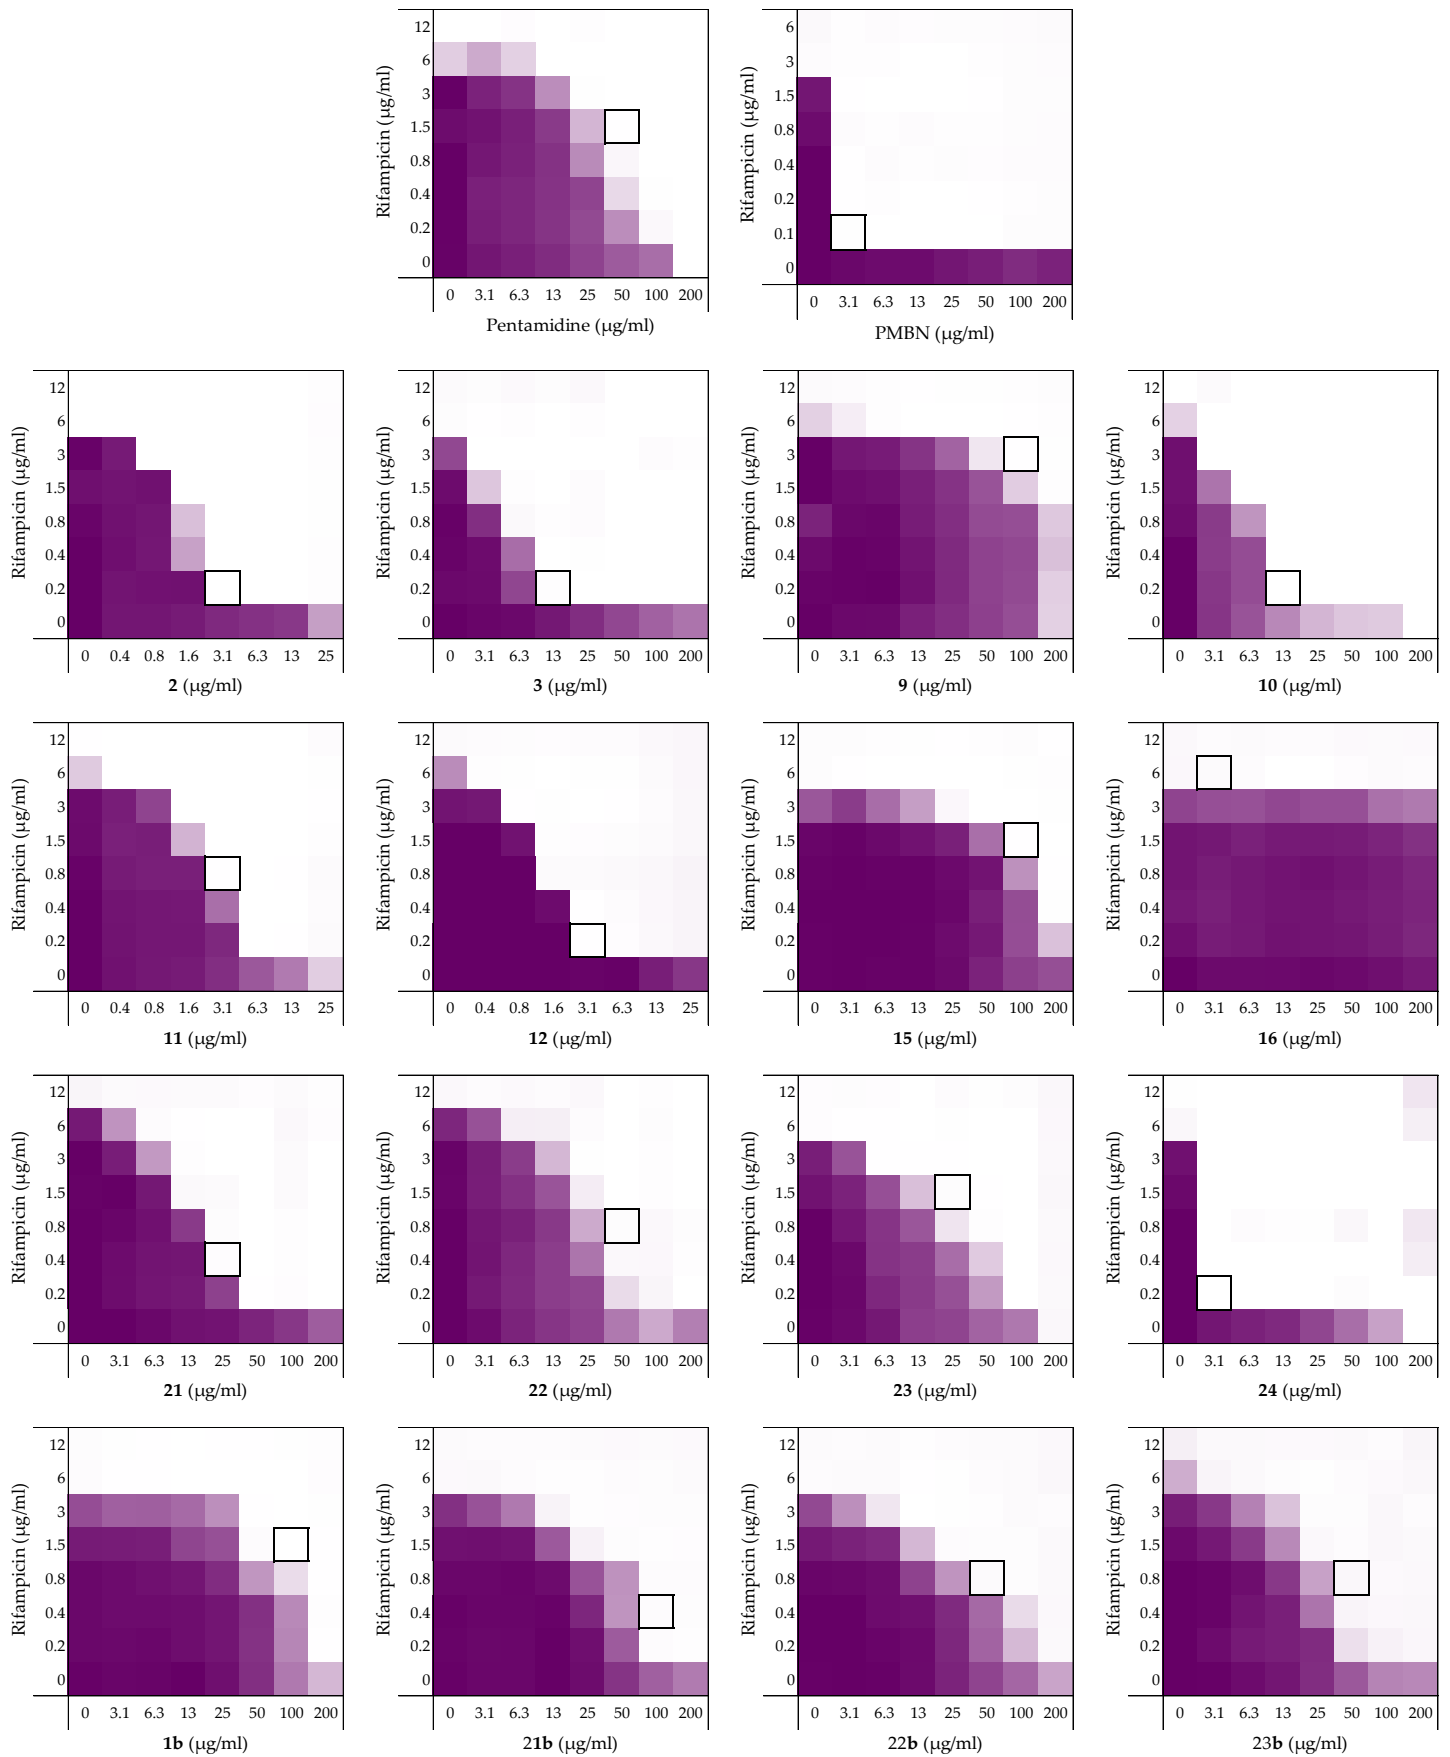

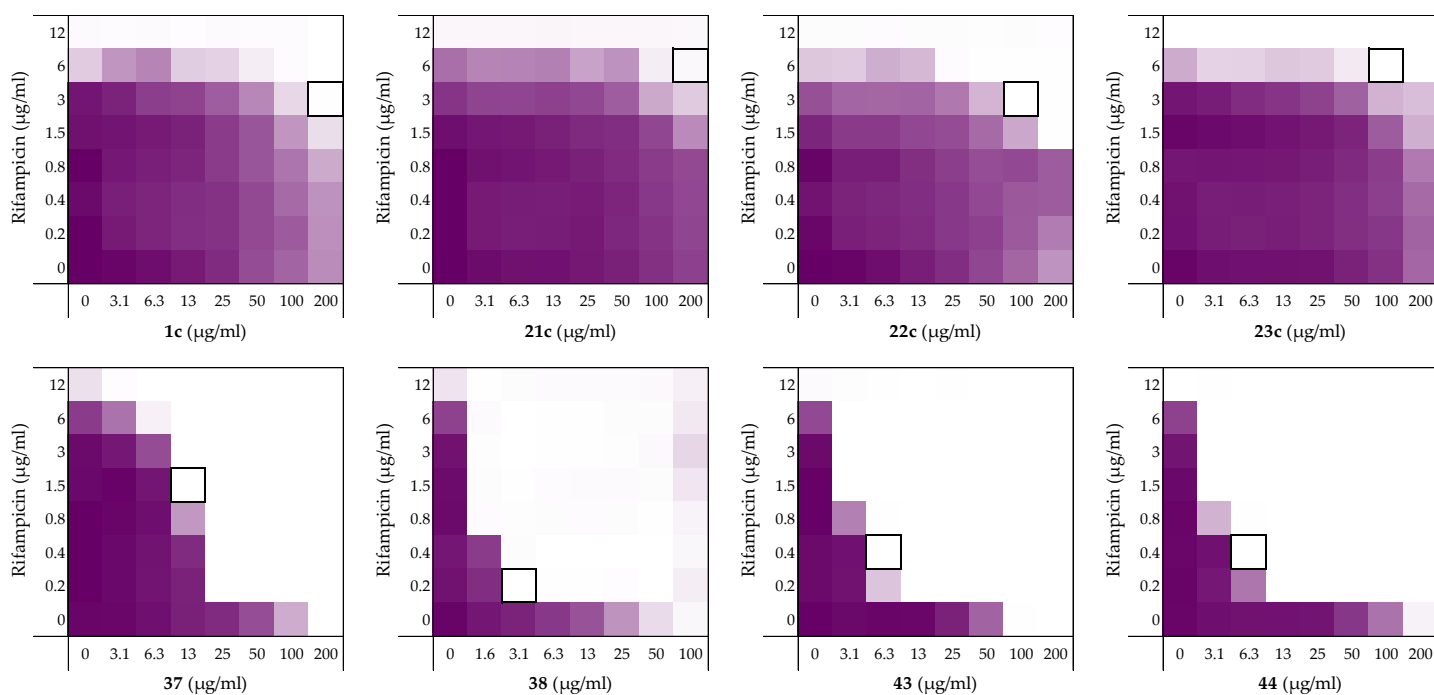

**Figure S2** Checkerboard assays of the compounds and PMBN in combination with rifampicin versus *E. coli* BW25113. OD600 values were measured using a plate reader and transformed to a gradient: purple represents growth, white represents no growth. In each case, the bounded box in the checkerboard assays indicates the minimal synergistic concentration (MSC) of compound and antibiotic resulting in the lowest FICI.

**Table S2** Synergistic data of compounds and PMBN of the checkerboard assays with rifampicin as shown in Figure S2. All minimal inhibitory concentrations (MICs) and minimal synergistic concentrations (MSCs) are in  $\mu\text{g/mL}$ .

|     | Structures | MIC  | MSC  | MIC rif | MSC rif | FICI         |
|-----|------------|------|------|---------|---------|--------------|
| 1   |            | 200  | 50   | 12      | 1.5     | 0.375        |
| 2   |            | >25  | 3.13 | 6       | 0.19    | $\leq 0.094$ |
| 3   |            | >200 | 12.5 | 6       | 0.19    | $\leq 0.063$ |
| 9   |            | >200 | 100  | 12      | 3       | $\leq 0.500$ |
| 10  |            | 200  | 12.5 | 12      | 0.19    | 0.078        |
| 11  |            | >25  | 3.13 | 12      | 0.75    | $\leq 0.125$ |
| 12  |            | >25  | 3.13 | 12      | 0.19    | $\leq 0.078$ |
| 15  |            | >200 | 100  | 6       | 1.5     | $\leq 0.500$ |
| 16  |            | >200 | 3.13 | 6       | 6       | $> 0.5^a$    |
| 21  |            | >200 | 25   | 12      | 0.38    | $\leq 0.094$ |
| 22  |            | >200 | 50   | 12      | 0.75    | $\leq 0.188$ |
| 23  |            | 200  | 25   | 6       | 1.5     | 0.375        |
| 24  |            | 200  | 3.13 | 12      | 0.19    | 0.031        |
| 1b  |            | >200 | 100  | 12      | 1.5     | $\leq 0.375$ |
| 21b |            | >200 | 100  | 6       | 0.38    | $\leq 0.313$ |

|             |  |      |       |     |      |                   |
|-------------|--|------|-------|-----|------|-------------------|
| <b>22b</b>  |  | >200 | 50    | 6   | 0.75 | ≤0.250            |
| <b>23b</b>  |  | >200 | 50    | >12 | 0.75 | ≤0.156            |
| <b>1c</b>   |  | >200 | nd.   | 12  | nd.  | >0.5 <sup>a</sup> |
| <b>21c</b>  |  | >200 | nd.   | 12  | nd.  | >0.5 <sup>a</sup> |
| <b>22c</b>  |  | >200 | nd.   | 12  | nd.  | >0.5 <sup>a</sup> |
| <b>23c</b>  |  | >200 | nd.   | 12  | nd.  | >0.5 <sup>a</sup> |
| <b>37</b>   |  | 200  | 12.5  | >12 | 1.5  | ≤0.125            |
| <b>38</b>   |  | 100  | 3.13  | >12 | 0.19 | ≤0.039            |
| <b>43</b>   |  | 100  | 6.25  | 12  | 0.38 | 0.094             |
| <b>44</b>   |  | >200 | 6.25  | 12  | 0.38 | ≤0.047            |
| <b>PMBN</b> |  | >200 | 3.125 | 3   | 0.09 | ≤0.039            |

<sup>a</sup> Synergy is defined as FICI ≤ 0.5.<sup>5</sup>



## Synergy data of compounds 1, 3, 21, 22, 23b, 37, 38, 43, 44, and PMBN

### Checkerboard assays and FICI data against *E.coli* BW25113 with novobiocin

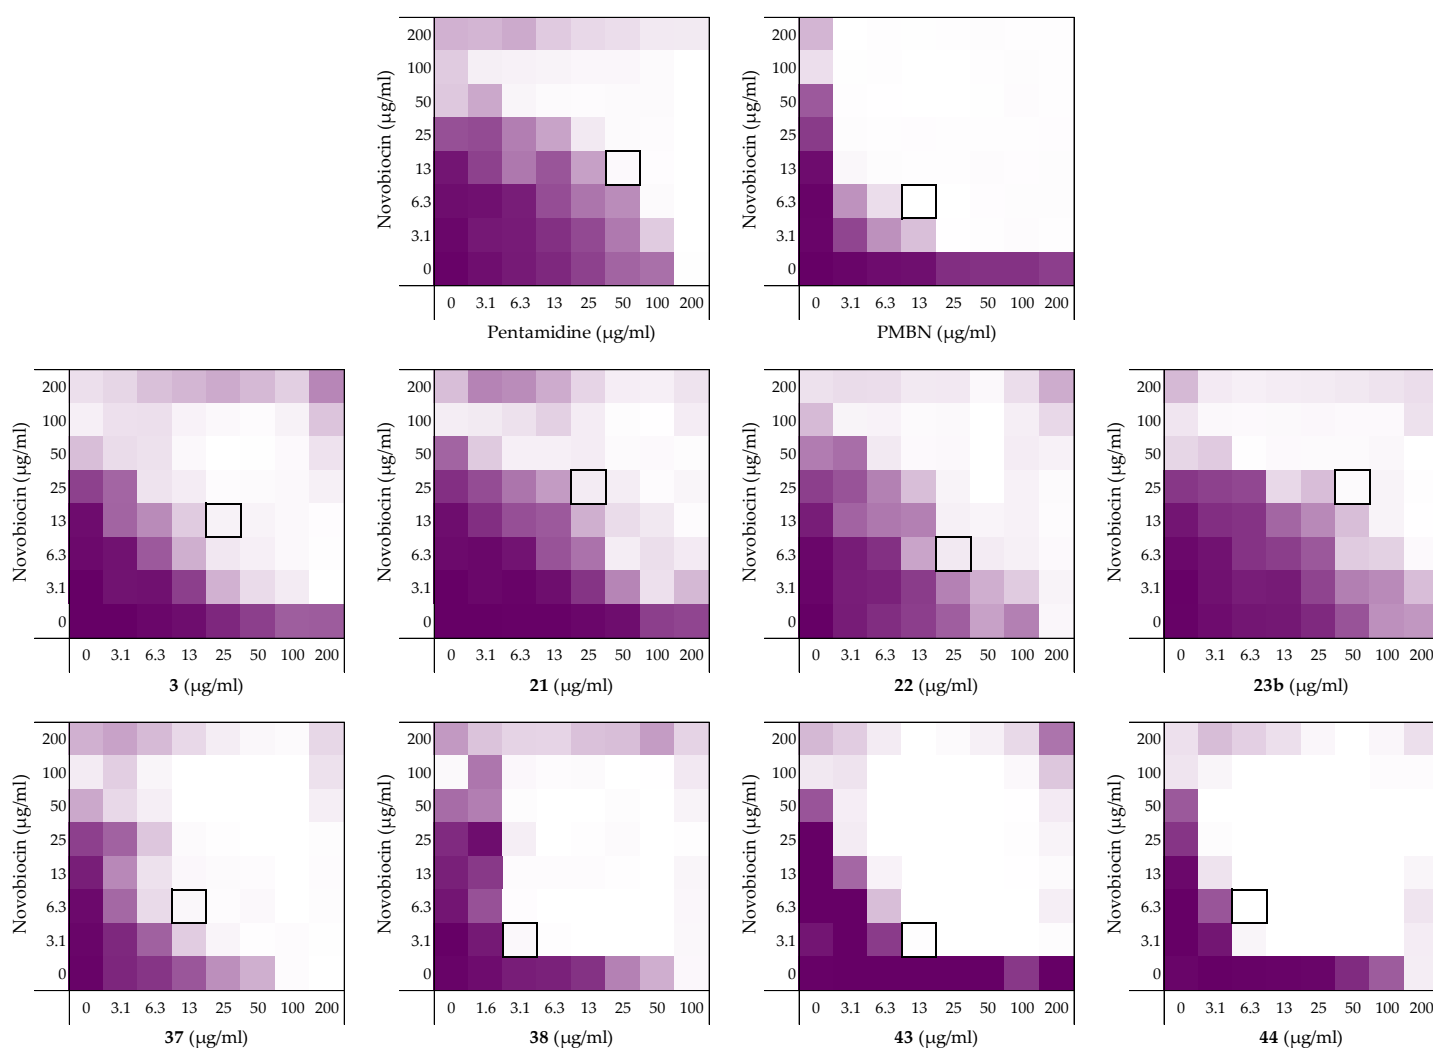

**Figure S3** Checkerboard assays of compounds 1, 3, 21, 22, 23b, 37, 38, 43, 44, and PMBN in combination with novobiocin versus *E. coli* BW25113. OD<sub>600</sub> values were measured using a plate reader and transformed to a gradient: purple represents growth, white represents no growth. In each case, the bounded box in the checkerboard assays indicates the minimal synergistic concentration (MSC) of compound and antibiotic resulting in the lowest FICI.

**Table S3** Synergistic data of compounds **1**, **3**, **21**, **22**, **23b**, **37**, **38**, **43**, **44**, and PMBN of the checkerboard results for *E.coli* BW25113 with novobiocin as shown in Figure S3. All minimal inhibitory concentrations (MICs) and minimal synergistic concentrations (MSCs) are in  $\mu\text{g/mL}$ .

|             | Structures                                                                          | MIC  | MSC  | MIC nov | MSC nov | FICI         |
|-------------|-------------------------------------------------------------------------------------|------|------|---------|---------|--------------|
| <b>1</b>    | 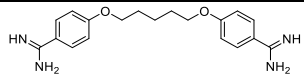   | 200  | 50   | >200    | 12.5    | $\leq 0.281$ |
| <b>3</b>    |    | >200 | 25   | >200    | 12.5    | $\leq 0.094$ |
| <b>21</b>   |    | >200 | 25   | >200    | 25      | $\leq 0.125$ |
| <b>22</b>   |    | >200 | 25   | >200    | 6.25    | $\leq 0.078$ |
| <b>23b</b>  |    | >200 | 50   | >200    | 25      | $\leq 0.188$ |
| <b>37</b>   |   | 200  | 12.5 | >200    | 6.25    | $\leq 0.078$ |
| <b>38</b>   |  | 100  | 3.13 | >200    | 3.13    | $\leq 0.039$ |
| <b>43</b>   |  | >200 | 12.5 | >200    | 3.13    | $\leq 0.039$ |
| <b>44</b>   |  | >200 | 6.25 | >200    | 6.25    | $\leq 0.031$ |
| <b>PMBN</b> |                                                                                     | >200 | 12.5 | >200    | 6.25    | $\leq 0.047$ |

## Checkerboard assays and FICI data against *E.coli* BW25113 with vancomycin

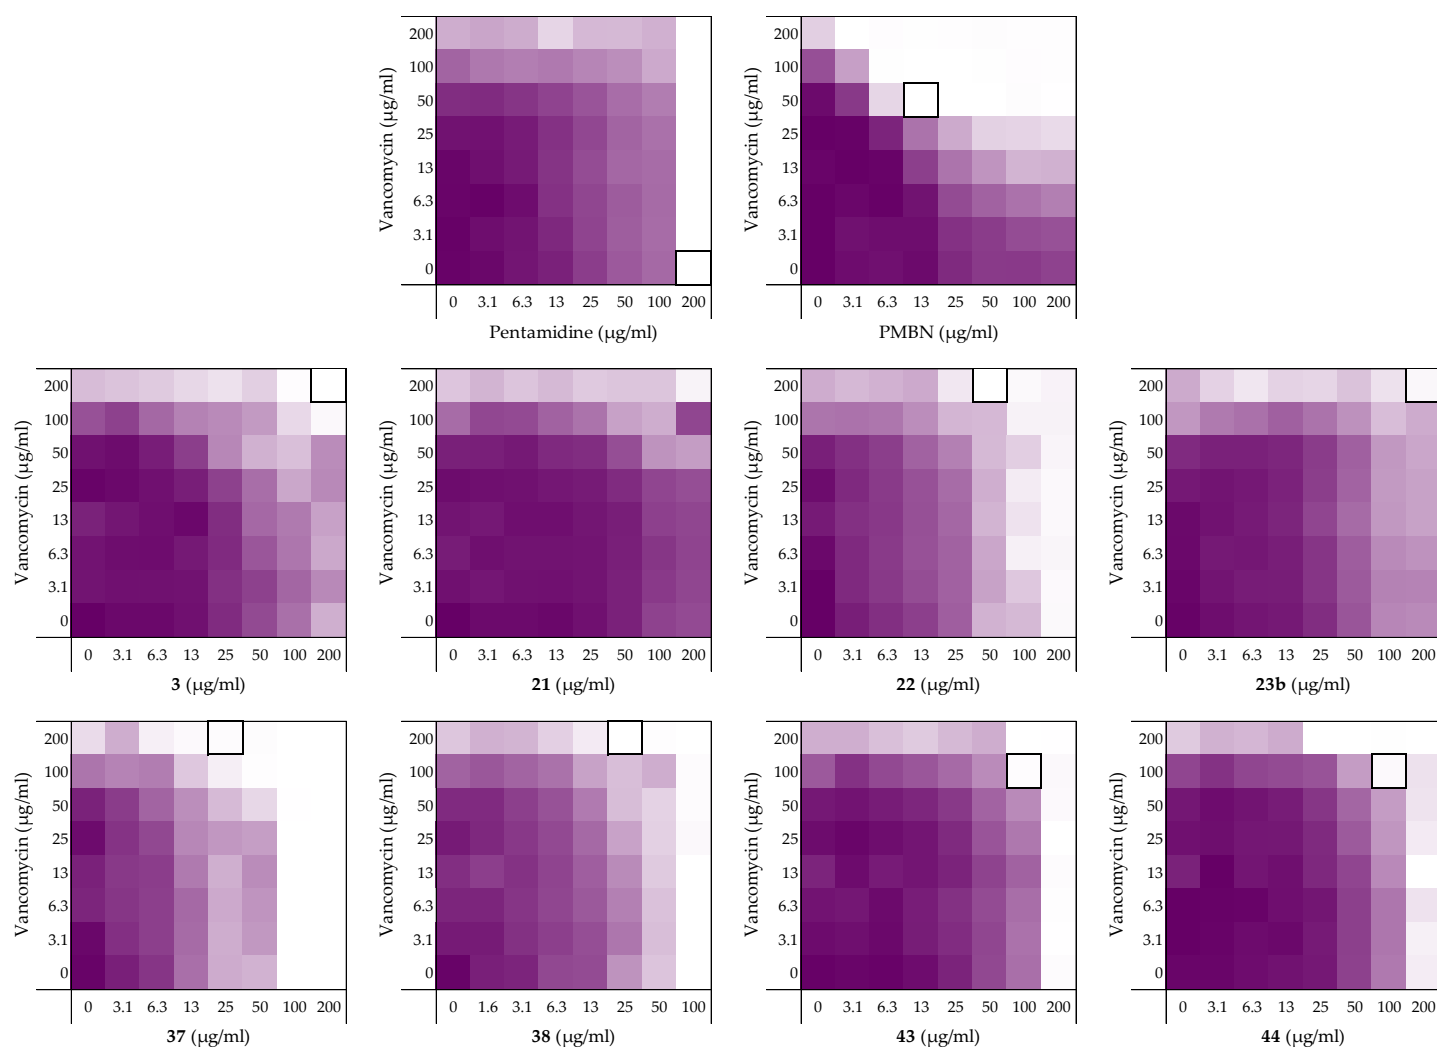

**Figure S4** Checkerboard assays of compounds **1**, **3**, **21**, **22**, **23b**, **37**, **38**, **43**, **44**, and PMBN in combination with vancomycin versus *E.coli* BW25113. OD<sub>600</sub> values were measured using a plate reader and transformed to a gradient: purple represents growth, white represents no growth. In each case, the bounded box in the checkerboard assays indicates the minimal synergistic concentration (MSC) of compound and antibiotic resulting in the lowest FICI.

**Table S4** Synergistic data of compounds **1**, **3**, **21**, **22**, **23b**, **37**, **38**, **43**, **44**, and PMBN of the checkerboard results for *E.coli* BW25113 with vancomycin as shown in Figure S4. All minimal inhibitory concentrations (MICs) and minimal synergistic concentrations (MSCs) are in  $\mu\text{g/mL}$ .

|             | Structures                                                                          | MIC  | MSC  | MIC van | MSC van | FICI              |
|-------------|-------------------------------------------------------------------------------------|------|------|---------|---------|-------------------|
| <b>1</b>    | 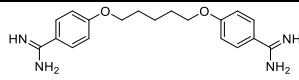   | 200  | 200  | >200    | -       | >0.5 <sup>a</sup> |
| <b>3</b>    |    | >200 | 200  | >200    | 200     | >0.5 <sup>a</sup> |
| <b>21</b>   |    | >200 | >200 | >200    | >200    | >0.5 <sup>a</sup> |
| <b>22</b>   |    | >200 | 50   | >200    | 200     | >0.5 <sup>a</sup> |
| <b>23b</b>  |    | >200 | 200  | >200    | 200     | >0.5 <sup>a</sup> |
| <b>37</b>   |   | 100  | 25   | >200    | 200     | >0.5 <sup>a</sup> |
| <b>38</b>   |  | 100  | 25   | >200    | 200     | >0.5 <sup>a</sup> |
| <b>43</b>   |  | 200  | 100  | >200    | 100     | >0.5 <sup>a</sup> |
| <b>44</b>   |  | >200 | 100  | >200    | 100     | $\leq 0.500$      |
| <b>PMBN</b> |                                                                                     | >200 | 12.5 | >200    | 50      | $\leq 0.156$      |

<sup>a</sup>Synergy is defined as  $\text{FICI} \leq 0.5$ .<sup>5</sup>

## Synergy data of compounds 1, 3, 21, 22, 23b, 37, 38, 43, 44, and PMBN with rifampicin

*E. coli* ATCC25922

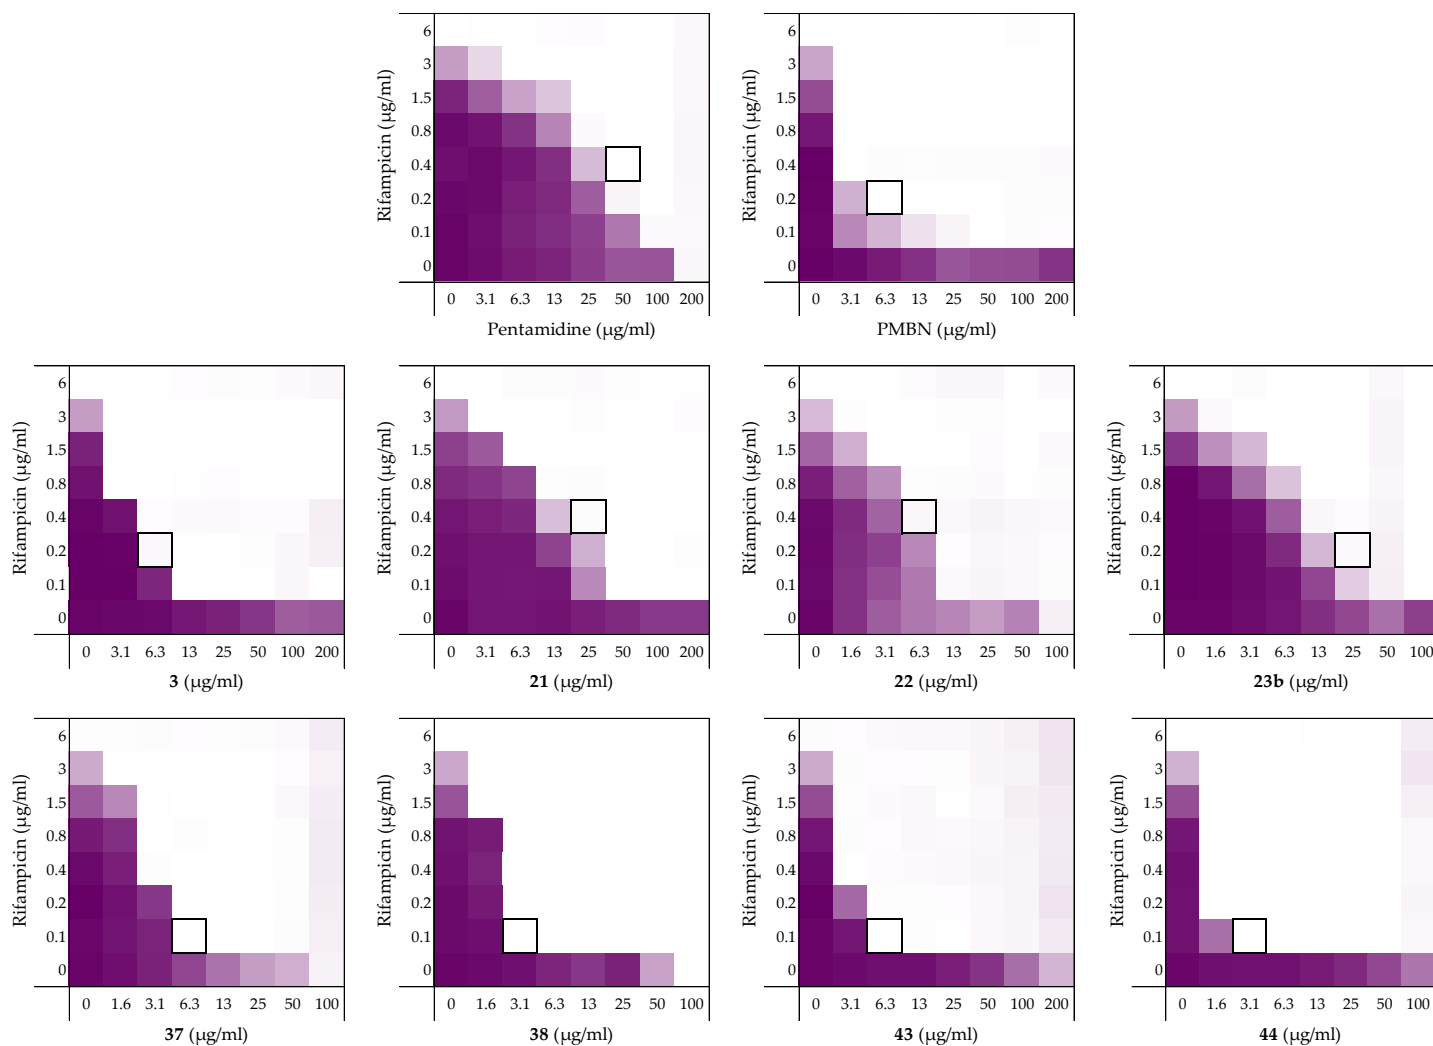

**Figure S5** Checkerboard assays of compounds 1, 3, 21, 22, 23b, 37, 38, 43, 44, and PMBN in combination with rifampicin versus *E. coli* ATCC25922. OD<sub>600</sub> values were measured using a plate reader and transformed to a gradient: purple represents growth, white represents no growth. In each case, the bounded box in the checkerboard assays indicates the minimal synergistic concentration (MSC) of compound and antibiotic resulting in the lowest FICI.

**Table S5** Synergistic data of compounds **1**, **3**, **21**, **22**, **23b**, **37**, **38**, **43**, **44**, and PMBN of the checkerboard results for *E.coli* ATCC25922 with rifampicin as shown in Figure S5. All minimal inhibitory concentrations (MICs) and minimal synergistic concentrations (MSCs) are in  $\mu\text{g/mL}$ .

|             | Structures                                                                          | MIC  | MSC  | MIC rif | MSC rif | FICI         |
|-------------|-------------------------------------------------------------------------------------|------|------|---------|---------|--------------|
| <b>1</b>    | 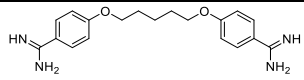   | 200  | 50   | 6       | 0.38    | 0.313        |
| <b>3</b>    |    | >200 | 6.25 | 6       | 0.19    | $\leq 0.047$ |
| <b>21</b>   |    | >200 | 25   | 6       | 0.38    | $\leq 0.125$ |
| <b>22</b>   |    | 200  | 6.25 | 6       | 0.38    | 0.094        |
| <b>23b</b>  |    | 200  | 25   | 6       | 0.19    | 0.156        |
| <b>37</b>   |   | 100  | 6.25 | 6       | 0.09    | 0.078        |
| <b>38</b>   |  | 100  | 3.13 | 6       | 0.09    | 0.047        |
| <b>43</b>   |  | >200 | 6.25 | 6       | 0.09    | $\leq 0.031$ |
| <b>44</b>   |  | 200  | 3.13 | 6       | 0.09    | 0.031        |
| <b>PMBN</b> |                                                                                     | >200 | 6.25 | 6       | 0.19    | $\leq 0.047$ |

*E. coli* W3110

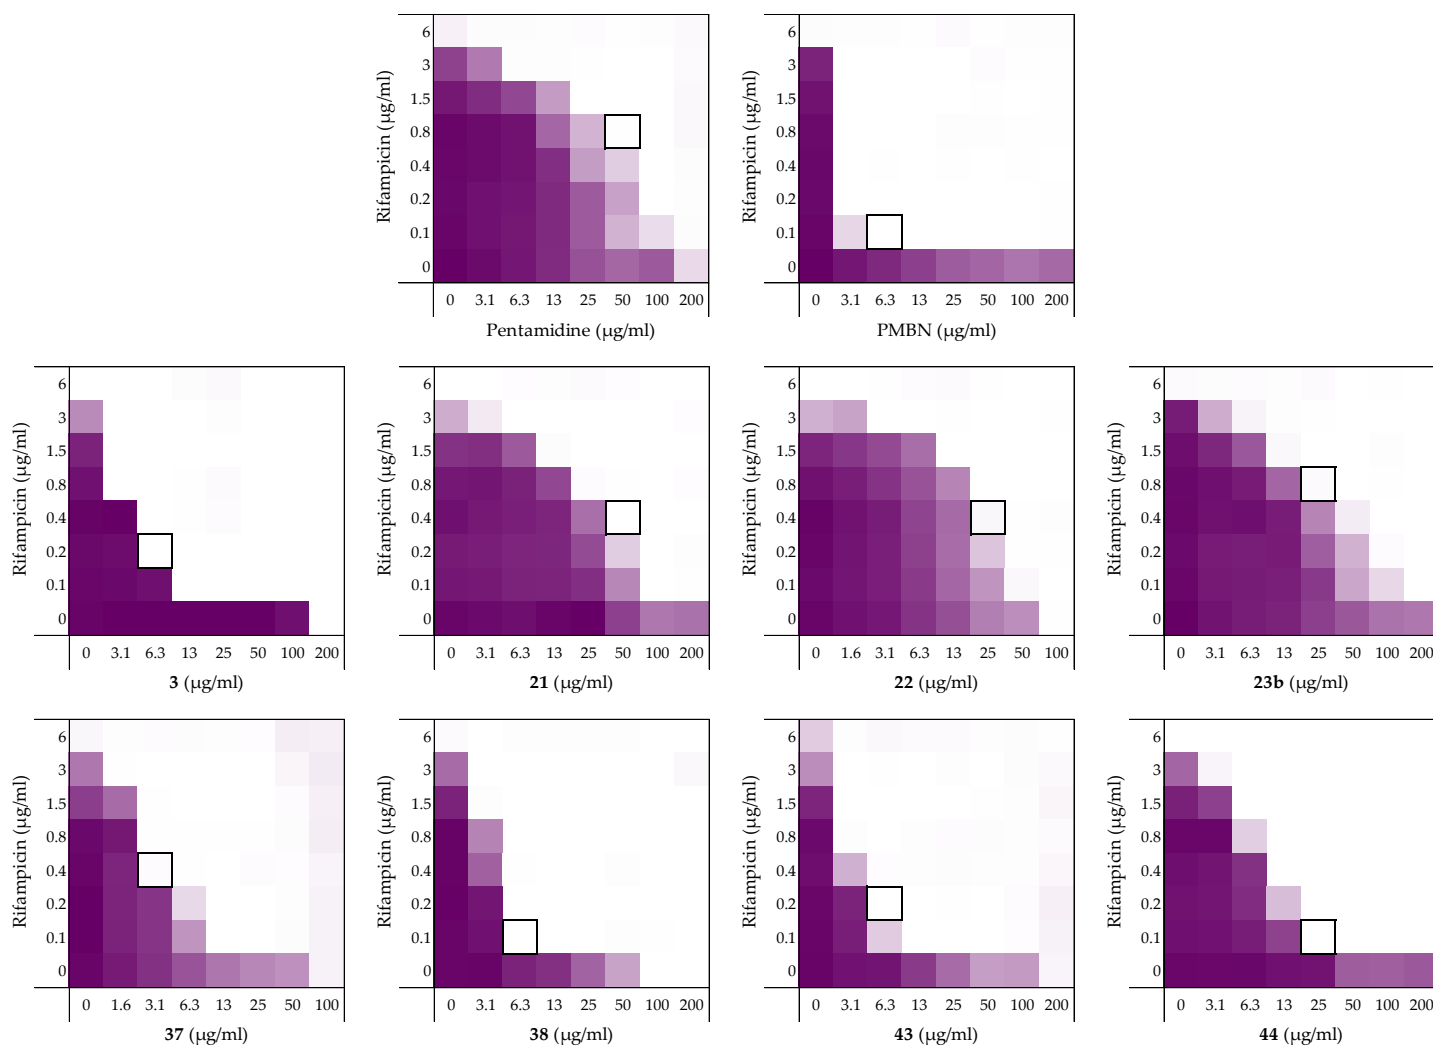

**Figure S6** Checkerboard assays of compounds **1**, **3**, **21**, **22**, **23b**, **37**, **38**, **43**, **44**, and PMBN in combination with rifampicin versus *E. coli* W3110. OD<sub>600</sub> values were measured using a plate reader and transformed to a gradient: purple represents growth, white represents no growth. In each case, the bounded box in the checkerboard assays indicates the minimal synergistic concentration (MSC) of compound and antibiotic resulting in the lowest FICI.

**Table S6** Synergistic data of compounds **1**, **3**, **21**, **22**, **23b**, **37**, **38**, **43**, **44**, and PMBN of the checkerboard results for *E.coli* W3110 with rifampicin as shown in Figure S6. All minimal inhibitory concentrations (MICs) and minimal synergistic concentrations (MSCs) are in  $\mu\text{g/mL}$ .

|             | Structures                                                                          | MIC  | MSC  | MIC rif | MSC rif | FICI         |
|-------------|-------------------------------------------------------------------------------------|------|------|---------|---------|--------------|
| <b>1</b>    | 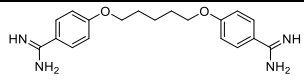   | >200 | 50   | >6      | 0.75    | $\leq 0.188$ |
| <b>3</b>    |    | 200  | 6.25 | 6       | 0.19    | 0.063        |
| <b>21</b>   |    | >200 | 50   | 6       | 0.38    | $\leq 0.188$ |
| <b>22</b>   |    | 100  | 25   | 6       | 0.38    | 0.313        |
| <b>23b</b>  |    | >200 | 25   | 6       | 0.75    | $\leq 0.188$ |
| <b>37</b>   |   | 100  | 3.13 | >6      | 0.38    | $\leq 0.063$ |
| <b>38</b>   |  | 100  | 6.25 | >6      | 0.09    | $\leq 0.070$ |
| <b>43</b>   |  | 200  | 6.25 | >6      | 0.19    | $\leq 0.047$ |
| <b>44</b>   |  | >200 | 25   | 6       | 0.09    | $\leq 0.078$ |
| <b>PMBN</b> |                                                                                     | >200 | 6.25 | 6       | 0.09    | $\leq 0.031$ |



*E. coli* 552060.1

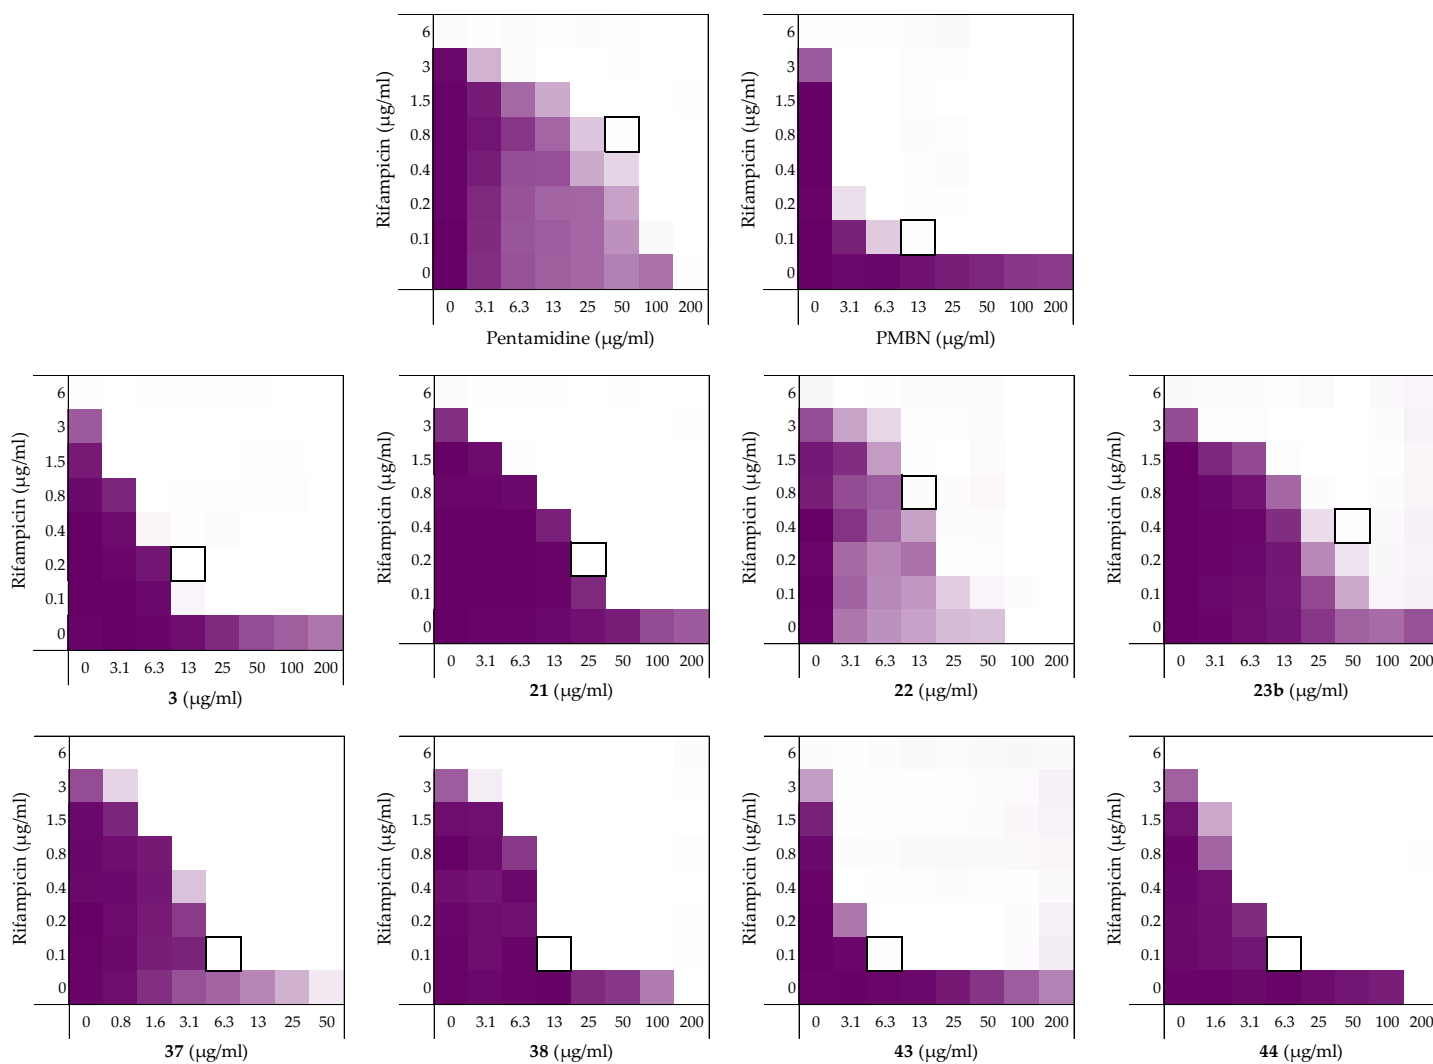

**Figure S7** Checkerboard assays of compounds **1**, **3**, **21**, **22**, **23b**, **37**, **38**, **43**, **44**, and PMBN in combination with rifampicin versus *E. coli* 552060.1. OD<sub>600</sub> values were measured using a plate reader and transformed to a gradient: purple represents growth, white represents no growth. In each case, the bounded box in the checkerboard assays indicates the minimal synergistic concentration (MSC) of compound and antibiotic resulting in the lowest FICI.

**Table S7** Synergistic data of compounds **1**, **3**, **21**, **22**, **23b**, **37**, **38**, **43**, **44**, and PMBN of the checkerboard results for *E.coli* 5552060.1 with rifampicin as shown in Figure S7. All minimal inhibitory concentrations (MICs) and minimal synergistic concentrations (MSCs) are in  $\mu\text{g/mL}$ .

|             | Structures                                                                          | MIC  | MSC  | MIC rif | MSC rif | FICI         |
|-------------|-------------------------------------------------------------------------------------|------|------|---------|---------|--------------|
| <b>1</b>    | 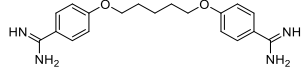   | 200  | 50   | 6       | 0.75    | 0.375        |
| <b>3</b>    |    | >200 | 12.5 | 6       | 0.19    | $\leq 0.063$ |
| <b>21</b>   |    | >200 | 25   | 6       | 0.19    | $\leq 0.094$ |
| <b>22</b>   |    | 100  | 12.5 | 6       | 0.75    | 0.250        |
| <b>23b</b>  |    | >200 | 50   | 6       | 0.38    | $\leq 0.188$ |
| <b>37</b>   |   | 100  | 6.25 | 6       | 0.09    | 0.078        |
| <b>38</b>   |  | 200  | 12.5 | 6       | 0.09    | 0.078        |
| <b>43</b>   |  | >200 | 6.25 | 6       | 0.09    | $\leq 0.031$ |
| <b>44</b>   |  | 200  | 6.25 | 6       | 0.09    | 0.047        |
| <b>PMBN</b> |                                                                                     | >200 | 12.5 | 6       | 0.09    | $\leq 0.047$ |

*E. coli* BW25113 *mcr-1*

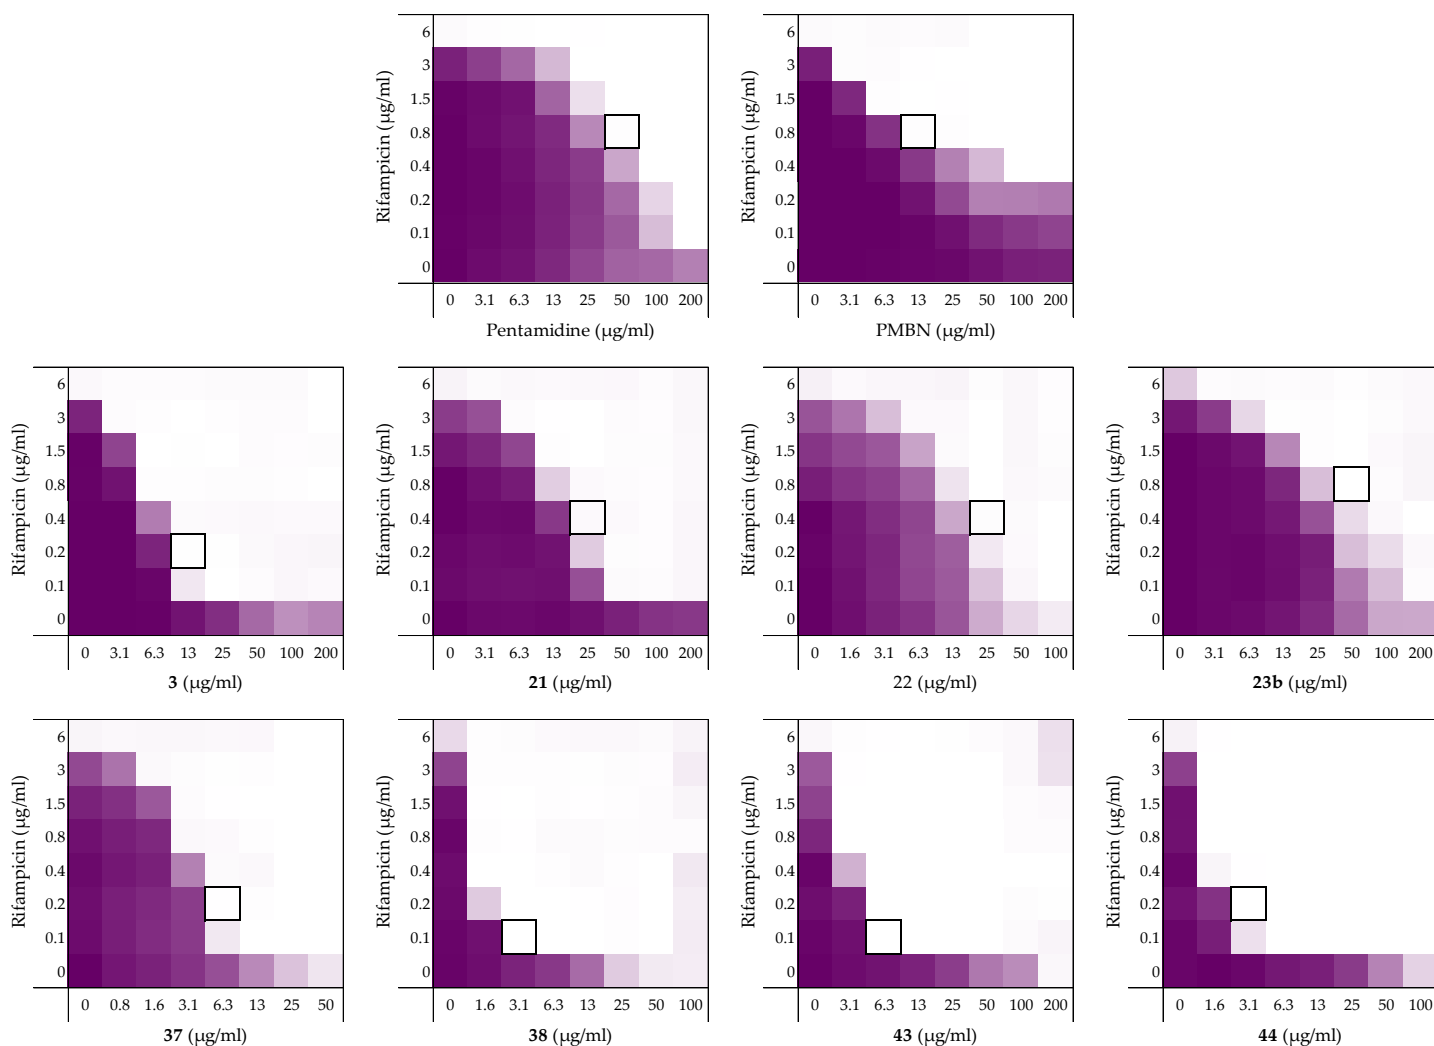

**Figure S8** Checkerboard assays of compounds **1**, **3**, **21**, **22**, **23b**, **37**, **38**, **43**, **44**, and PMBN in combination with rifampicin versus *E. coli* BW25113 *mcr-1*. OD<sub>600</sub> values were measured using a plate reader and transformed to a gradient: purple represents growth, white represents no growth. In each case, the bounded box in the checkerboard assays indicates the minimal synergistic concentration (MSC) of compound and antibiotic resulting in the lowest FICI.

**Table S8** Synergistic data of compounds **1**, **3**, **21**, **22**, **23b**, **37**, **38**, **43**, **44**, and PMBN of the checkerboard results for *E.coli* BW25113 *mcr-1* with rifampicin as shown in Figure S8. All minimal inhibitory concentrations (MICs) and minimal synergistic concentrations (MSCs) are in  $\mu\text{g/mL}$ .

|             | Structures                                                                          | MIC  | MSC  | MIC rif | MSC rif | FICI         |
|-------------|-------------------------------------------------------------------------------------|------|------|---------|---------|--------------|
| <b>1</b>    | 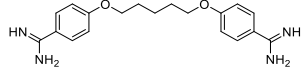   | >200 | 50   | 6       | 0.75    | $\leq 0.250$ |
| <b>3</b>    |    | >200 | 12.5 | 6       | 0.19    | $\leq 0.063$ |
| <b>21</b>   |    | >200 | 25   | >6      | 0.38    | $\leq 0.094$ |
| <b>22</b>   |    | >100 | 25   | >6      | 0.38    | $\leq 0.156$ |
| <b>23b</b>  |    | >200 | 50   | >6      | 0.75    | $\leq 0.188$ |
| <b>37</b>   |   | >50  | 6.25 | >6      | 0.19    | $\leq 0.078$ |
| <b>38</b>   |  | 100  | 3.13 | >6      | 0.09    | $\leq 0.039$ |
| <b>43</b>   |  | 200  | 6.25 | >6      | 0.09    | $\leq 0.039$ |
| <b>44</b>   |  | >100 | 3.13 | >6      | 0.19    | $\leq 0.031$ |
| <b>PMBN</b> |                                                                                     | >200 | 12.5 | 6       | 0.75    | $\leq 0.156$ |

## *E. coli* mcr-1

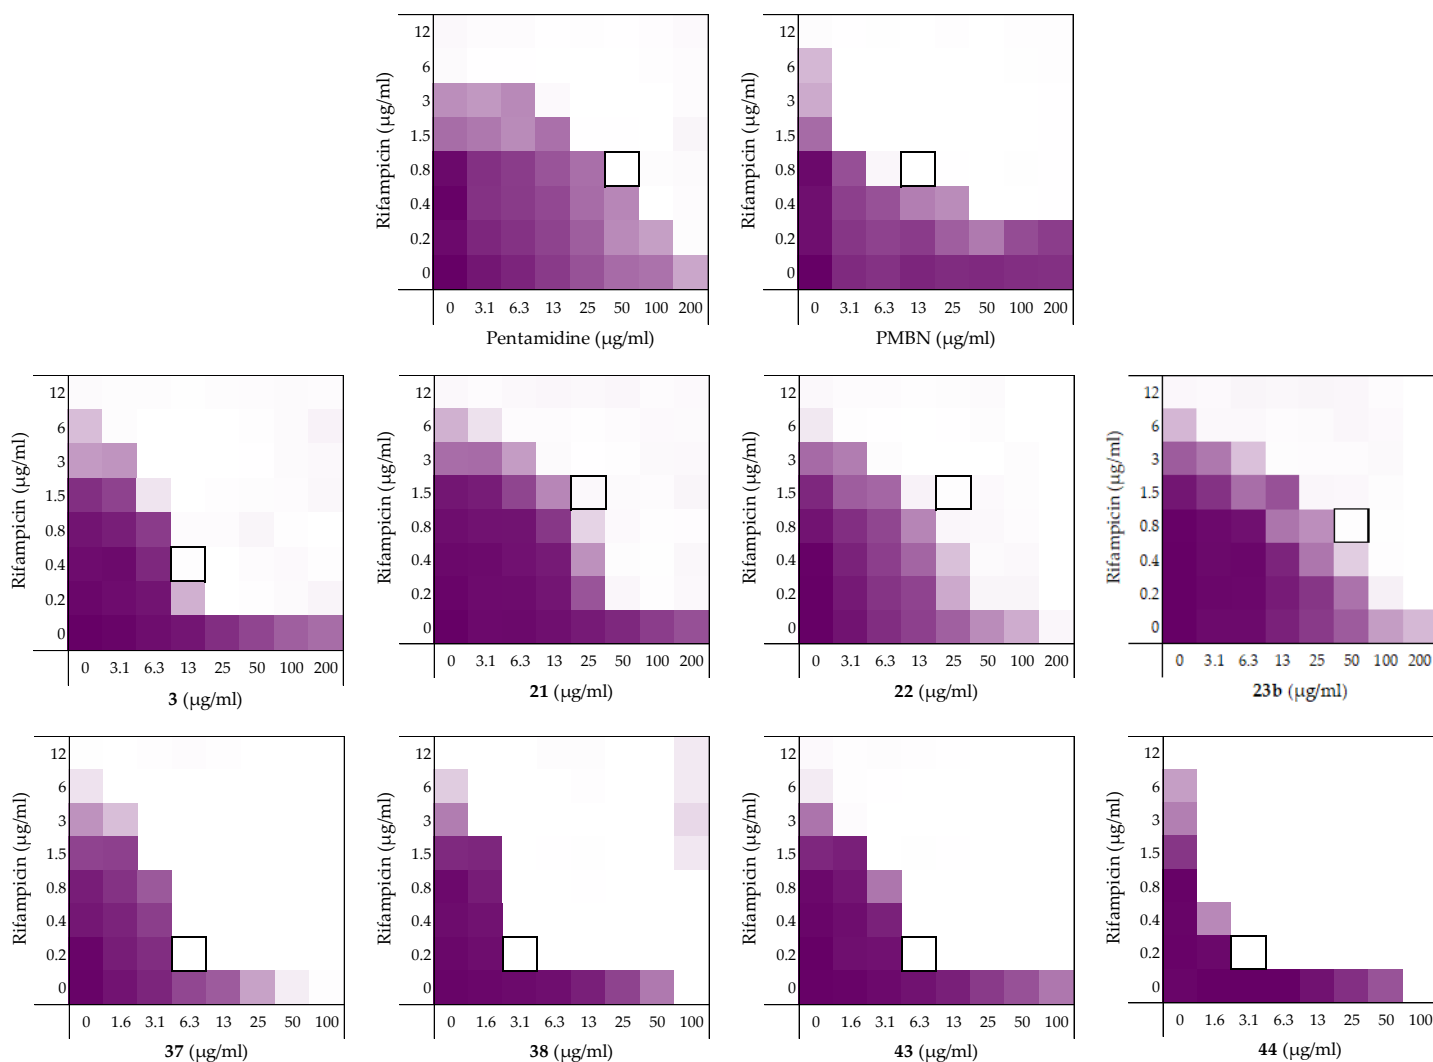

**Figure S9** Checkerboard assays of compounds **1**, **3**, **21**, **22**, **23b**, **37**, **38**, **43**, **44**, and PMBN in combination with rifampicin versus *E. coli* mcr-1. OD<sub>600</sub> values were measured using a plate reader and transformed to a gradient: purple represents growth, white represents no growth. In each case, the bounded box in the checkerboard assays indicates the minimal synergistic concentration (MSC) of compound and antibiotic resulting in the lowest FICI.

**Table S9** Synergistic data of compounds **1**, **3**, **21**, **22**, **23b**, **37**, **38**, **43**, **44**, and PMBN of the checkerboard results for *E.coli* mcr-1 with rifampicin as shown in Figure S9. All minimal inhibitory concentrations (MICs) and minimal synergistic concentrations (MSCs) are in  $\mu\text{g/mL}$ .

|             | Structures                                                                          | MIC  | MSC  | MIC rif | MSC rif | FICI         |
|-------------|-------------------------------------------------------------------------------------|------|------|---------|---------|--------------|
| <b>1</b>    | 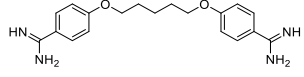   | >200 | 50   | 12      | 0.75    | $\leq 0.188$ |
| <b>3</b>    |    | >200 | 12.5 | 12      | 0.38    | $\leq 0.063$ |
| <b>21</b>   |    | >200 | 25   | 12      | 1.5     | $\leq 0.188$ |
| <b>22</b>   |    | >200 | 25   | 12      | 1.5     | $\leq 0.188$ |
| <b>23b</b>  |    | >200 | 50   | 12      | 0.75    | $\leq 0.188$ |
| <b>37</b>   |   | 100  | 6.25 | 12      | 0.19    | 0.078        |
| <b>38</b>   |  | 100  | 3.13 | 12      | 0.19    | 0.047        |
| <b>43</b>   |  | >100 | 6.25 | 12      | 0.19    | $\leq 0.047$ |
| <b>44</b>   |  | 100  | 3.13 | 12      | 0.19    | 0.047        |
| <b>PMBN</b> |                                                                                     | >200 | 12.5 | 12      | 0.75    | $\leq 0.094$ |

*E. coli* EQASmcr-1/EQAS 2016 412016126

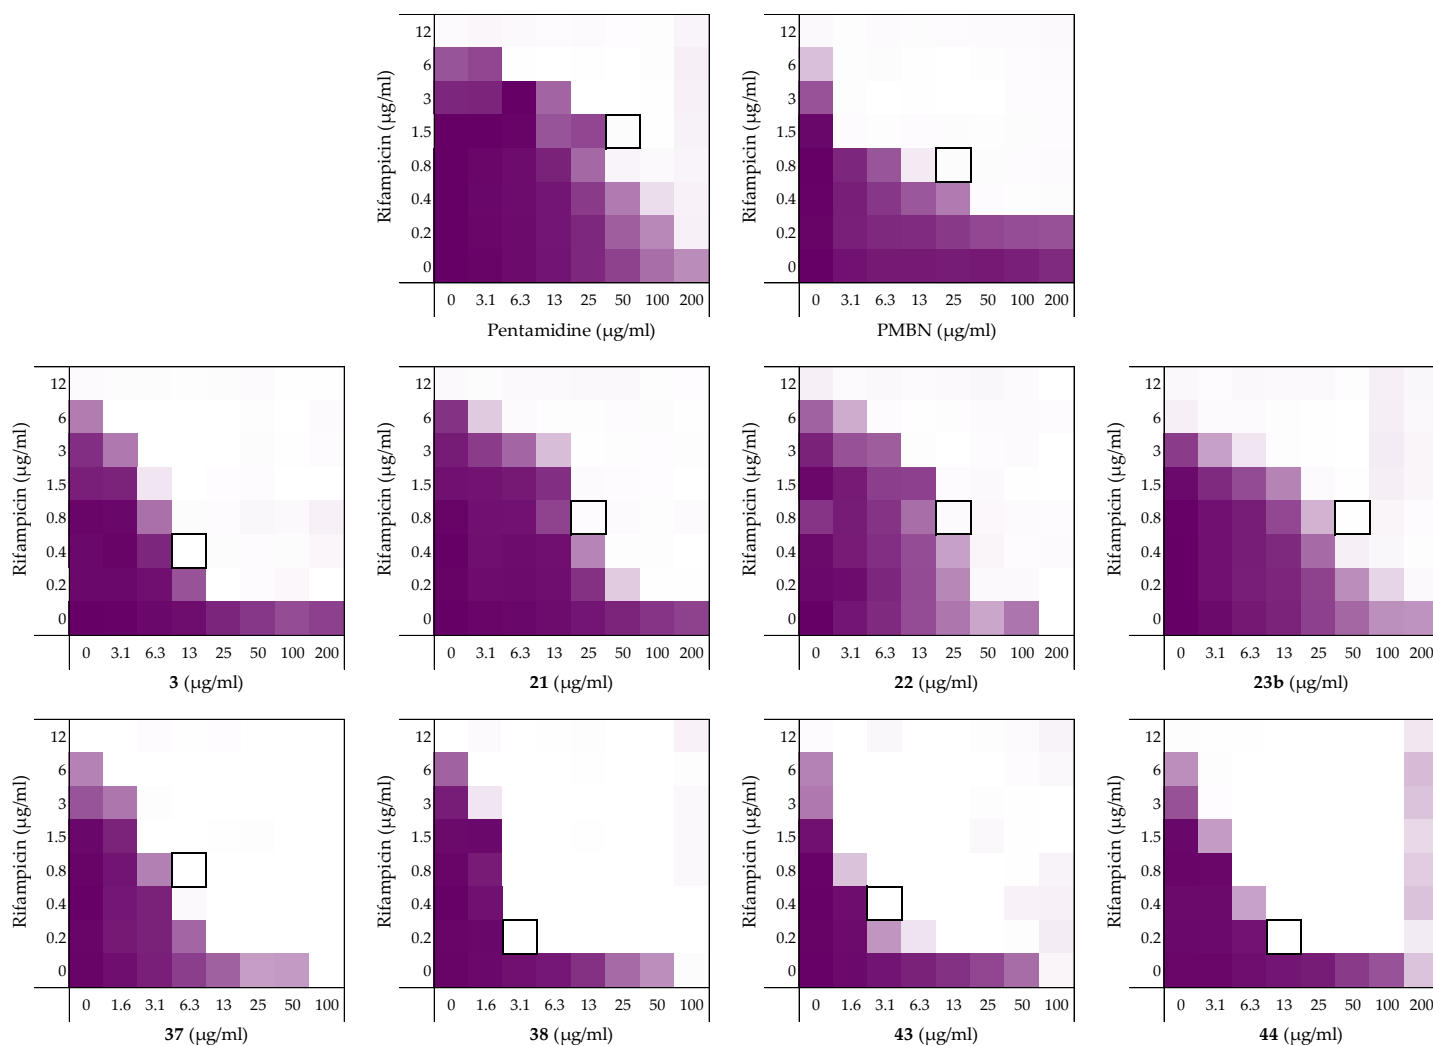

**Figure S10** Checkerboard assays of compounds **1**, **3**, **21**, **22**, **23b**, **37**, **38**, **43**, **44**, and PMBN in combination with rifampicin versus *E. coli* EQASmcr-1/EQAS 2016 412016126. OD<sub>600</sub> values were measured using a plate reader and transformed to a gradient: purple represents growth, white represents no growth. In each case, the bounded box in the checkerboard assays indicates the minimal synergistic concentration (MSC) of compound and antibiotic resulting in the lowest FICI.

**Table S10** Synergistic data of compounds **1**, **3**, **21**, **22**, **23b**, **37**, **38**, **43**, **44**, and PMBN of the checkerboard results for *E.coli* EQASmcr-1/EQAS 2016 412016126 with rifampicin as shown in Figure S10. All minimal inhibitory concentrations (MICs) and minimal synergistic concentrations (MSCs) are in  $\mu\text{g/mL}$ .

|             | Structures                                                                          | MIC  | MSC  | MIC rif | MSC rif | FICI         |
|-------------|-------------------------------------------------------------------------------------|------|------|---------|---------|--------------|
| <b>1</b>    | 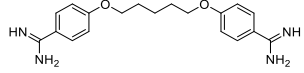   | >200 | 50   | 12      | 1.5     | $\leq 0.250$ |
| <b>3</b>    |    | >200 | 12.5 | 12      | 0.38    | $\leq 0.063$ |
| <b>21</b>   |    | >200 | 25   | 12      | 0.75    | $\leq 0.125$ |
| <b>22</b>   |    | 200  | 25   | 12      | 0.75    | 0.188        |
| <b>23b</b>  |    | >200 | 50   | 12      | 0.75    | $\leq 0.188$ |
| <b>37</b>   |   | 100  | 6.25 | 12      | 0.75    | 0.125        |
| <b>38</b>   |  | 100  | 3.13 | 12      | 0.19    | 0.047        |
| <b>43</b>   |  | 100  | 3.13 | 12      | 0.38    | 0.063        |
| <b>44</b>   |  | 200  | 12.5 | 12      | 0.19    | 0.078        |
| <b>PMBN</b> |                                                                                     | >200 | 25   | 12      | 0.75    | $\leq 0.125$ |



*E. coli* EQASmcr-2/EQAS 2016 KP37

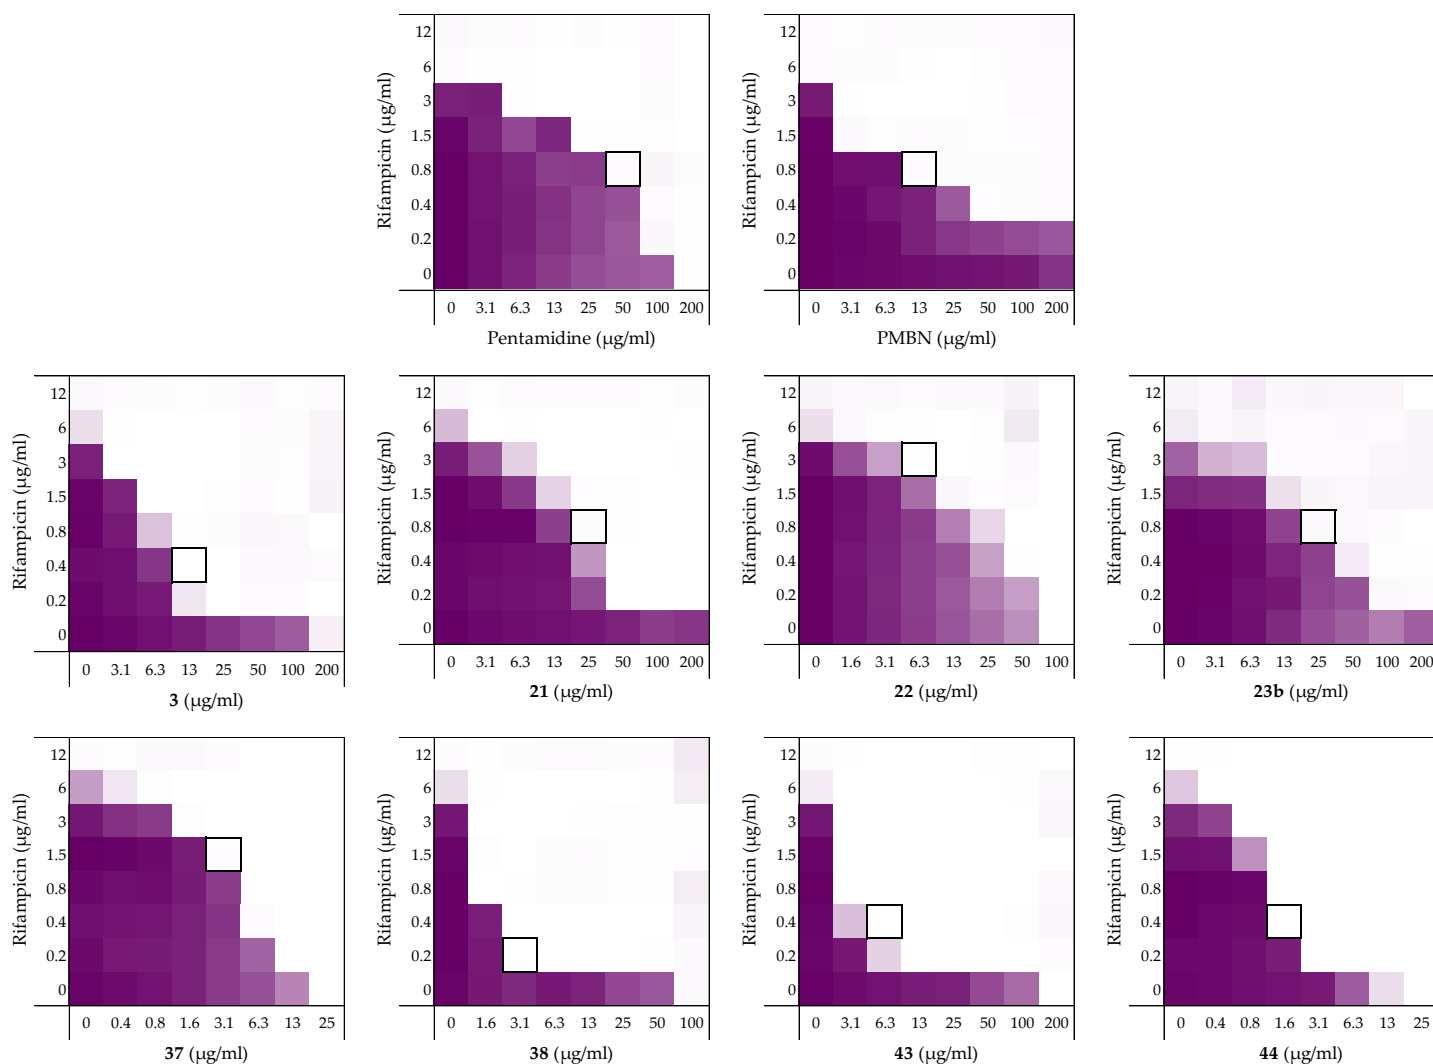

**Figure S11** Checkerboard assays of compounds **1**, **3**, **21**, **22**, **23b**, **37**, **38**, **43**, **44**, and PMBN in combination with rifampicin versus *E. coli* EQASmcr-2/EQAS 2016 KP37. OD<sub>600</sub> values were measured using a plate reader and transformed to a gradient: purple represents growth, white represents no growth. In each case, the bounded box in the checkerboard assays indicates the minimal synergistic concentration (MSC) of compound and antibiotic resulting in the lowest FICI.

**Table S11** Synergistic data compounds **1**, **3**, **21**, **22**, **23b**, **37**, **38**, **43**, **44**, and PMBN of the checkerboard results for *E.coli* EQASmcr-2/EQAS 2016 KP37 with rifampicin as shown in Figure S11. All minimal inhibitory concentrations (MICs) and minimal synergistic concentrations (MSCs) are in  $\mu\text{g/mL}$ .

|             | Structures                                                                          | MIC  | MSC  | MIC rif | MSC rif | FICI         |
|-------------|-------------------------------------------------------------------------------------|------|------|---------|---------|--------------|
| <b>1</b>    | 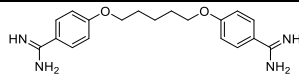   | 200  | 50   | 6       | 0.75    | 0.375        |
| <b>3</b>    |    | >200 | 12.5 | 12      | 0.38    | $\leq 0.063$ |
| <b>21</b>   |    | >200 | 25   | 12      | 0.75    | $\leq 0.125$ |
| <b>22</b>   |    | 100  | 6.25 | 12      | 3       | 0.313        |
| <b>23b</b>  |    | >200 | 25   | 12      | 0.75    | $\leq 0.125$ |
| <b>37</b>   |   | 25   | 3.13 | 12      | 1.5     | 0.250        |
| <b>38</b>   |  | 100  | 3.13 | 12      | 0.19    | 0.047        |
| <b>43</b>   |  | 200  | 6.25 | 12      | 0.38    | 0.063        |
| <b>44</b>   |  | 25   | 1.56 | 12      | 0.38    | 0.094        |
| <b>PMBN</b> |                                                                                     | >200 | 12.5 | 6       | 0.75    | $\leq 0.156$ |

*E. coli* EQASmcr-3/EQAS 2017 2013-SQ352

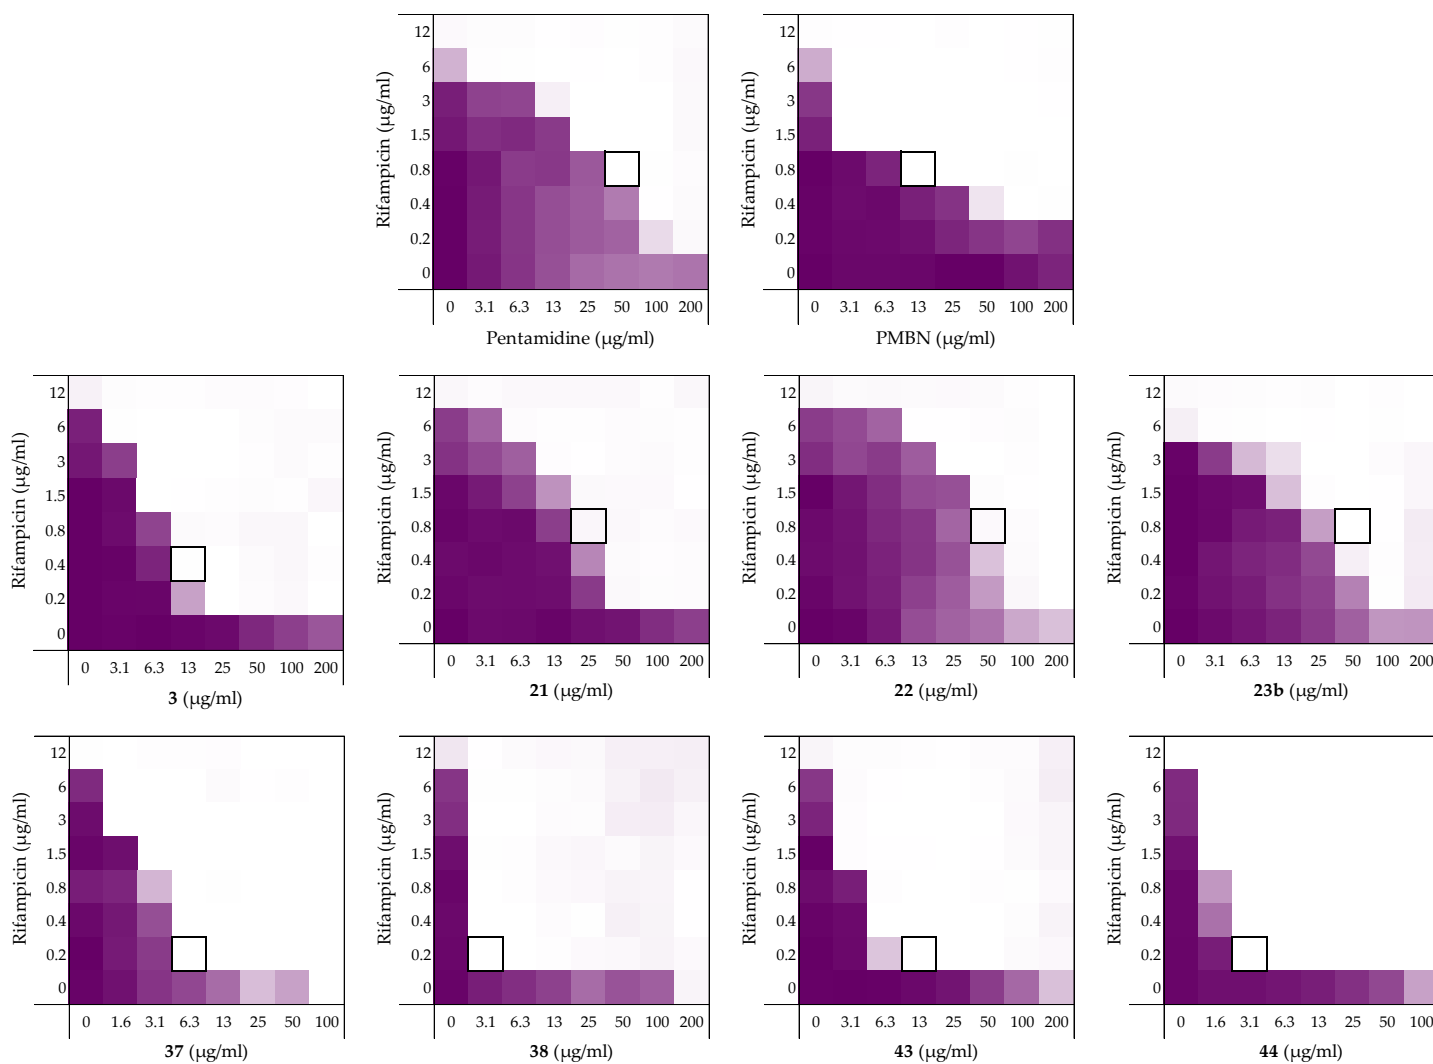

**Figure S12** Checkerboard assays of compounds **1**, **3**, **21**, **22**, **23b**, **37**, **38**, **43**, **44**, and PMBN in combination with rifampicin versus *E. coli* EQASmcr-3/EQAS 2017 2013-SQ352. OD<sub>600</sub> values were measured using a plate reader and transformed to a gradient: purple represents growth, white represents no growth. In each case, the bounded box in the checkerboard assays indicates the minimal synergistic concentration (MSC) of compound and antibiotic resulting in the lowest FICI.

**Table S12** Synergistic data of compounds **1**, **3**, **21**, **22**, **23b**, **37**, **38**, **43**, **44**, and PMBN of the checkerboard results for *E.coli* EQASmcr-3/EQAS 2017 2013-SQ352 with rifampicin as shown in Figure S12. All minimal inhibitory concentrations (MICs) and minimal synergistic concentrations (MSCs) are in  $\mu\text{g/mL}$ .

|             | Structures                                                                          | MIC  | MSC  | MIC rif | MSC rif | FICI         |
|-------------|-------------------------------------------------------------------------------------|------|------|---------|---------|--------------|
| <b>1</b>    | 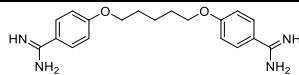   | >200 | 50   | 12      | 0.75    | $\leq 0.188$ |
| <b>3</b>    |    | >200 | 12.5 | 12      | 0.38    | $\leq 0.063$ |
| <b>21</b>   |    | >200 | 25   | 12      | 0.75    | $\leq 0.125$ |
| <b>22</b>   |    | >200 | 50   | 12      | 0.75    | $\leq 0.188$ |
| <b>23b</b>  |    | >200 | 50   | 12      | 0.75    | $\leq 0.188$ |
| <b>37</b>   |   | 100  | 6.25 | 12      | 0.19    | 0.078        |
| <b>38</b>   |  | 200  | 3.13 | 12      | 0.19    | 0.031        |
| <b>43</b>   |  | >200 | 12.5 | 12      | 0.19    | $\leq 0.047$ |
| <b>44</b>   |  | >100 | 3.13 | 12      | 0.19    | $\leq 0.031$ |
| <b>PMBN</b> |                                                                                     | >200 | 12.5 | 12      | 0.75    | $\leq 0.094$ |

*E. coli* RC00089

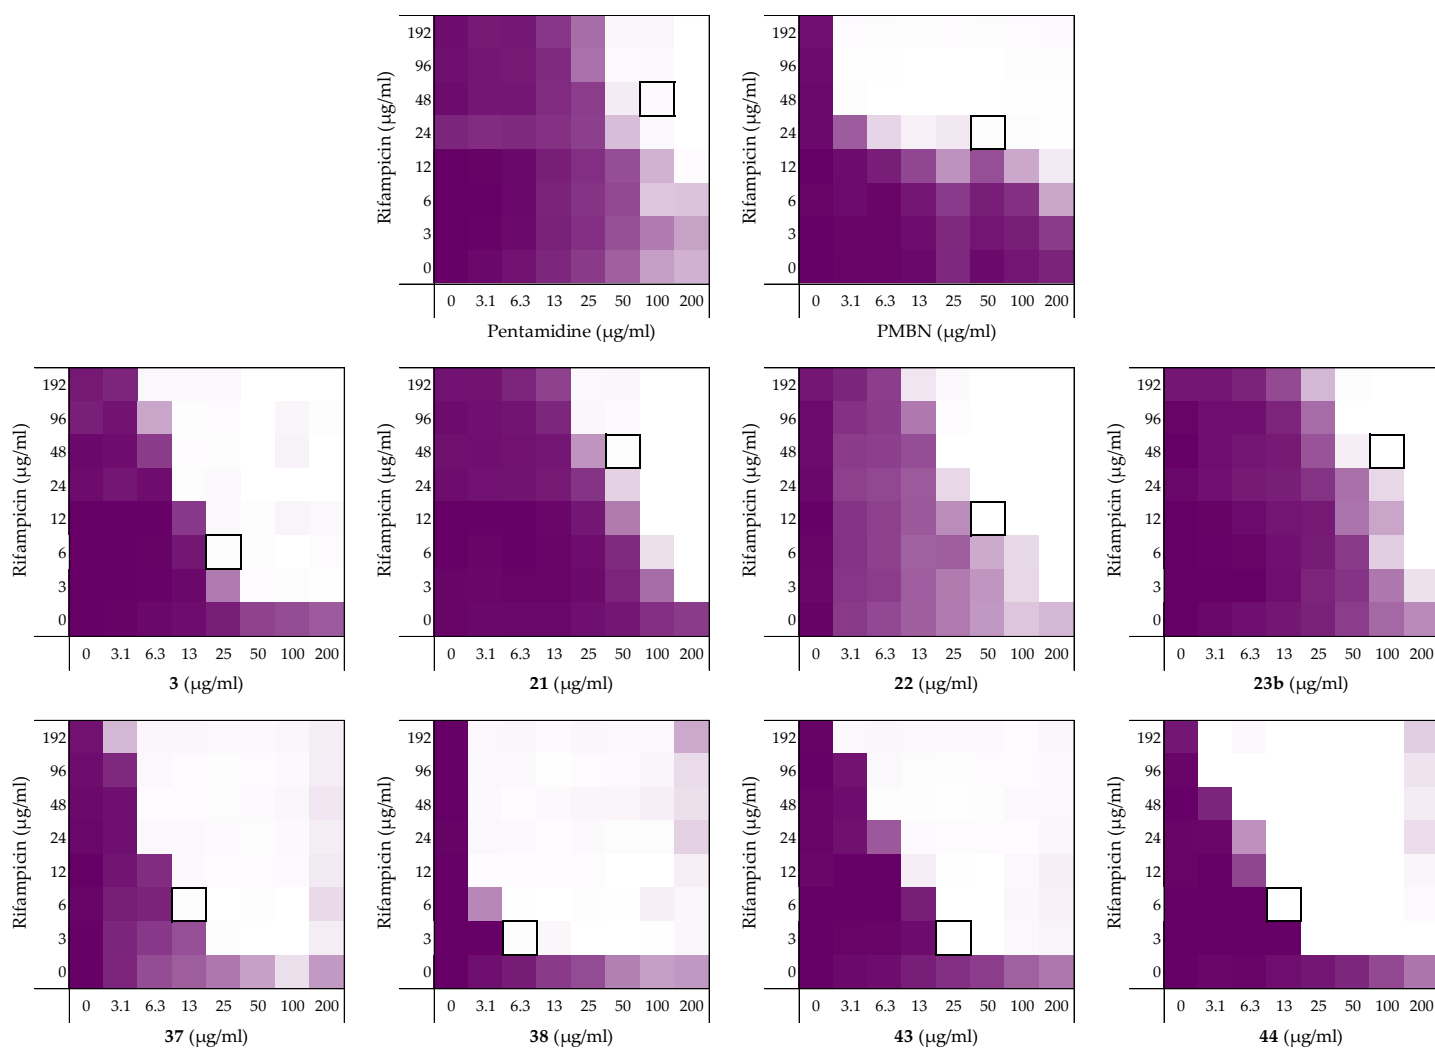

**Figure S13** Checkerboard assays of compounds **1**, **3**, **21**, **22**, **23b**, **37**, **38**, **43**, **44**, and PMBN in combination with rifampicin versus *E. coli* RC00089. OD<sub>600</sub> values were measured using a plate reader and transformed to a gradient: purple represents growth, white represents no growth. In each case, the bounded box in the checkerboard assays indicates the minimal synergistic concentration (MSC) of compound and antibiotic resulting in the lowest FICI.

**Table S13** Synergistic data of compounds **1**, **3**, **21**, **22**, **23b**, **37**, **38**, **43**, **44**, and PMBN of the checkerboard results for *E.coli* RC00089 with rifampicin as shown in Figure S13. All minimal inhibitory concentrations (MICs) and minimal synergistic concentrations (MSCs) are in  $\mu\text{g/mL}$ .

|             | Structures                                                                          | MIC  | MSC  | MIC rif | MSC rif | FICI         |
|-------------|-------------------------------------------------------------------------------------|------|------|---------|---------|--------------|
| <b>1</b>    | 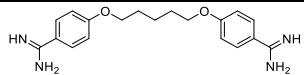   | >200 | 100  | >192    | 48      | $\leq 0.375$ |
| <b>3</b>    |    | >200 | 25   | >192    | 6       | $\leq 0.078$ |
| <b>21</b>   |    | >200 | 50   | >192    | 48      | $\leq 0.250$ |
| <b>22</b>   |    | >200 | 50   | >192    | 12      | $\leq 0.156$ |
| <b>23b</b>  |    | >200 | 100  | >192    | 48      | $\leq 0.375$ |
| <b>37</b>   |   | >200 | 12.5 | >192    | 6       | $\leq 0.047$ |
| <b>38</b>   |  | >200 | 6.25 | >192    | 3       | $\leq 0.023$ |
| <b>43</b>   |  | >200 | 25   | >192    | 3       | $\leq 0.070$ |
| <b>44</b>   |  | >200 | 12.5 | >192    | 6       | $\leq 0.047$ |
| <b>PMBN</b> |                                                                                     | >200 | 50   | >192    | 24      | $\leq 0.188$ |

*A. baumannii* ATCC17978

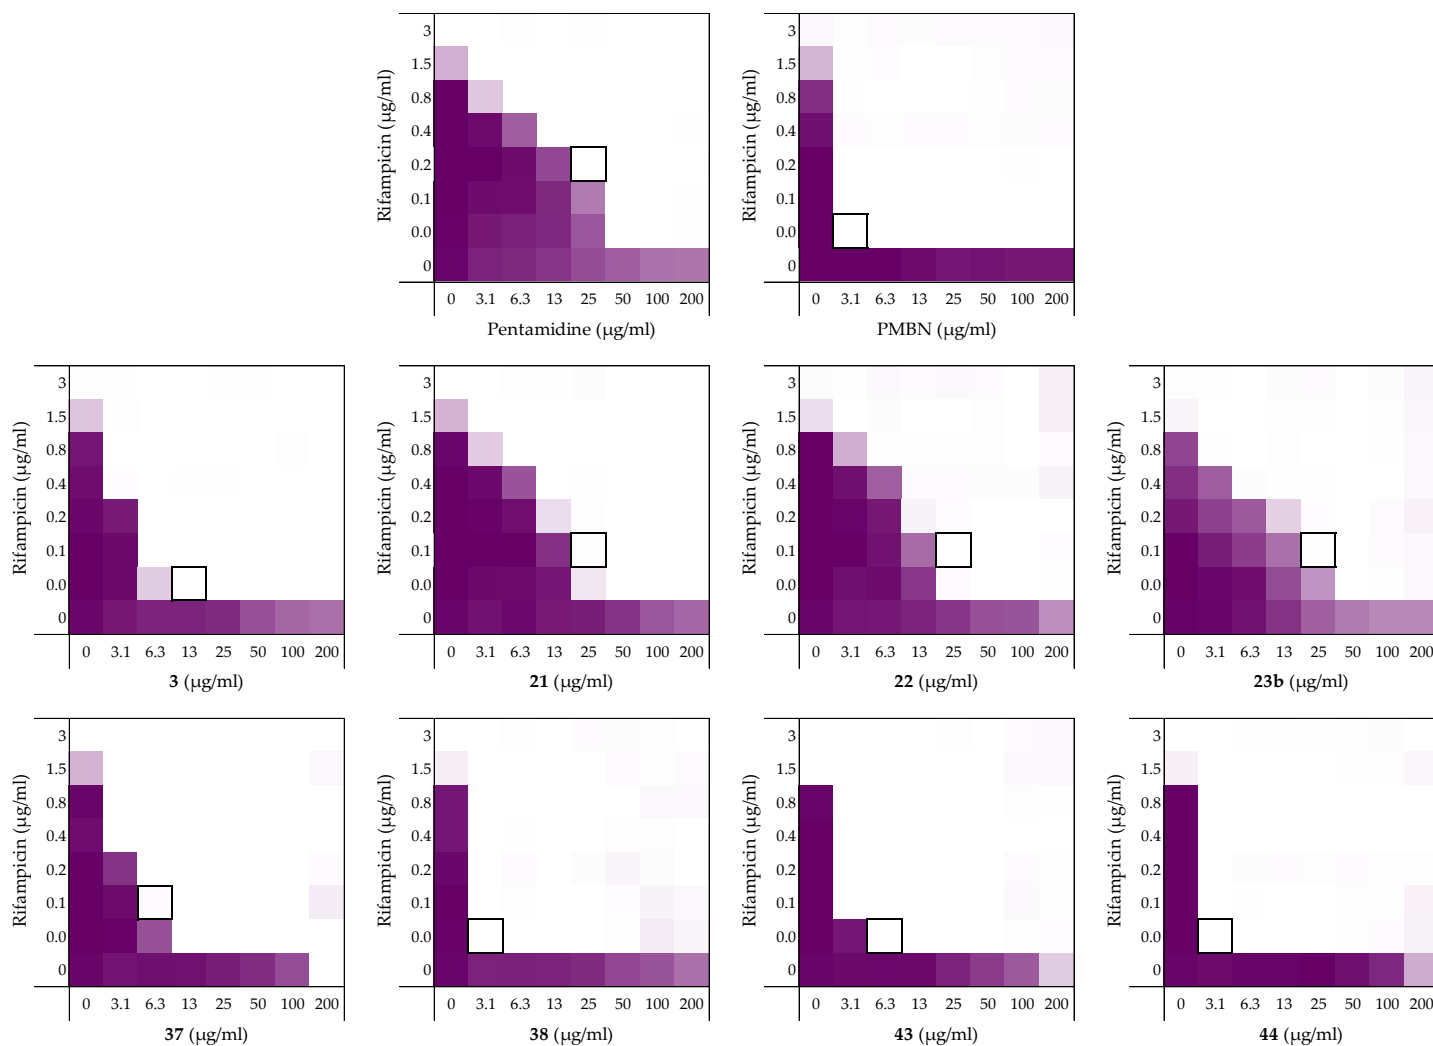

**Figure S14** Checkerboard assays of compounds **1**, **3**, **21**, **22**, **23b**, **37**, **38**, **43**, **44**, and PMBN in combination with rifampicin versus *A. baumannii* ATCC17978. OD<sub>600</sub> values were measured using a plate reader and transformed to a gradient: purple represents growth, white represents no growth. In each case, the bounded box in the checkerboard assays indicates the minimal synergistic concentration (MSC) of compound and antibiotic resulting in the lowest FICI.

**Table S14** Synergistic data of compounds **1**, **3**, **21**, **22**, **23b**, **37**, **38**, **43**, **44**, and PMBN of the checkerboard results for *A. baumannii* ATCC17978 with rifampicin as shown in Figure S14. All minimal inhibitory concentrations (MICs) and minimal synergistic concentrations (MSCs) are in  $\mu\text{g/mL}$ .

|             | Structures                                                                          | MIC  | MSC  | MIC rif | MSC rif | FICI         |
|-------------|-------------------------------------------------------------------------------------|------|------|---------|---------|--------------|
| <b>1</b>    | 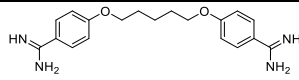   | >200 | 25   | 3       | 0.19    | $\leq 0.125$ |
| <b>3</b>    |    | >200 | 12.5 | 3       | 0.05    | $\leq 0.047$ |
| <b>21</b>   |    | >200 | 25   | 3       | 0.09    | $\leq 0.094$ |
| <b>22</b>   |    | >200 | 25   | 3       | 0.09    | $\leq 0.094$ |
| <b>23b</b>  |    | >200 | 25   | 3       | 0.09    | $\leq 0.094$ |
| <b>37</b>   |   | >200 | 6.25 | 3       | 0.09    | $\leq 0.047$ |
| <b>38</b>   |  | >200 | 3.13 | 3       | 0.05    | $\leq 0.023$ |
| <b>43</b>   |  | >200 | 6.25 | 1.5     | 0.05    | $\leq 0.047$ |
| <b>44</b>   |  | >200 | 3.13 | 3       | 0.05    | $\leq 0.023$ |
| <b>PMBN</b> |                                                                                     | >200 | 3.13 | 3       | 0.05    | $\leq 0.023$ |



*K. pneumoniae* ATCC13883

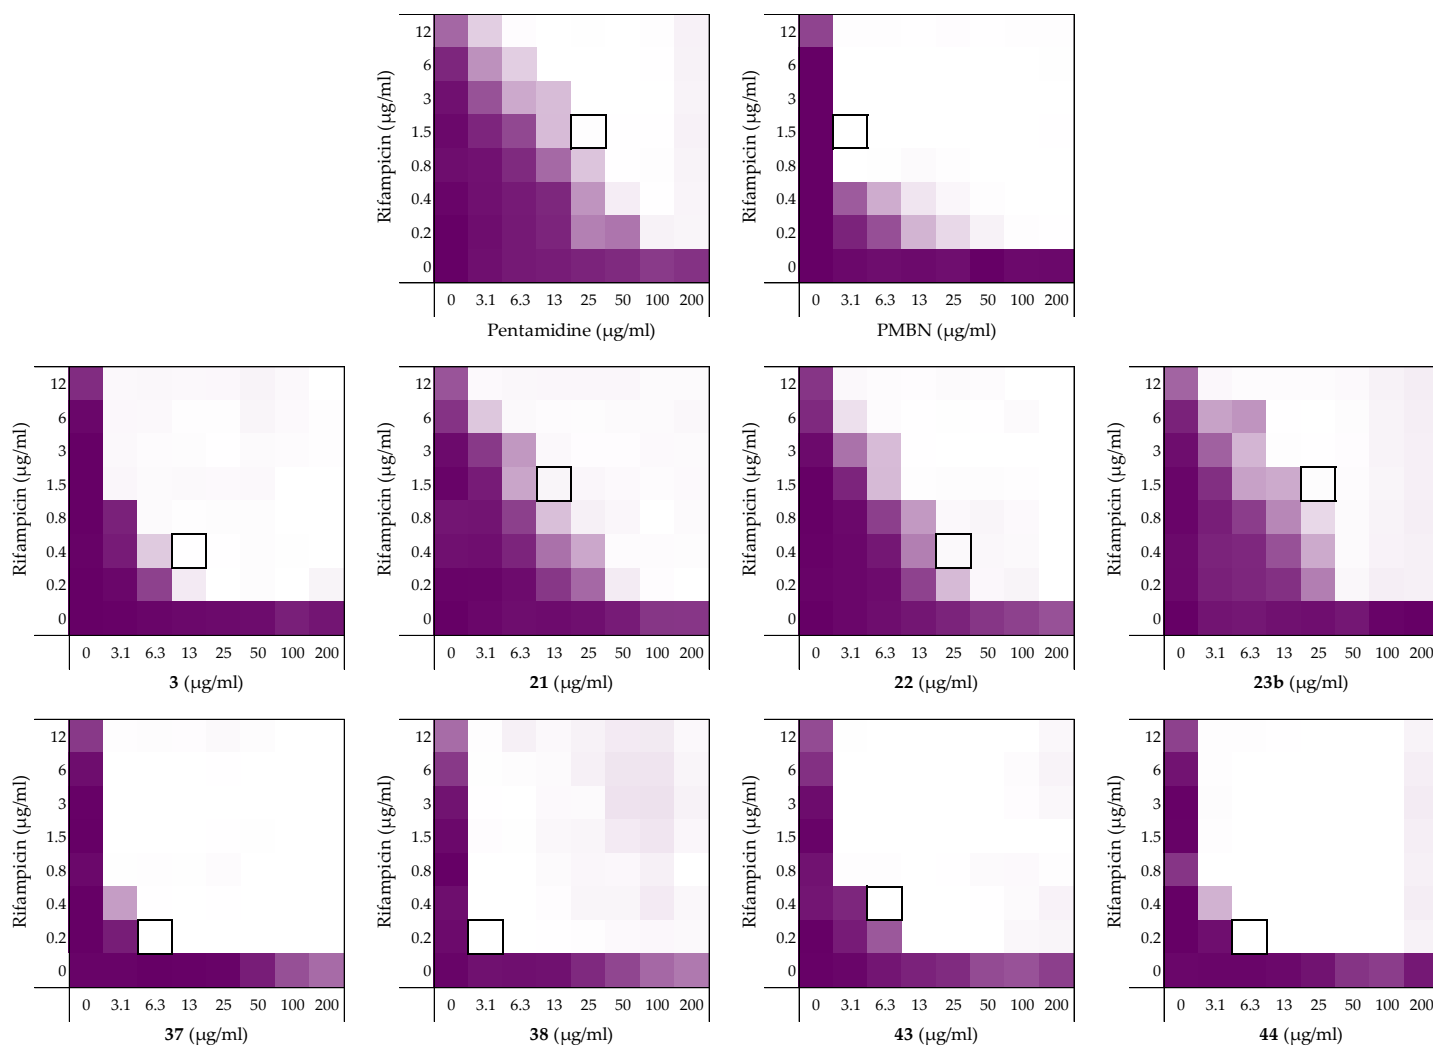

**Figure S15** Checkerboard assays of compounds **1**, **3**, **21**, **22**, **23b**, **37**, **38**, **43**, **44**, and PMBN in combination with rifampicin versus *K. pneumoniae* ATCC13883. OD<sub>600</sub> values were measured using a plate reader and transformed to a gradient: purple represents growth, white represents no growth. In each case, the bounded box in the checkerboard assays indicates the minimal synergistic concentration (MSC) of compound and antibiotic resulting in the lowest FICI.

**Table S15** Synergistic data of compounds **1**, **3**, **21**, **22**, **23b**, **37**, **38**, **43**, **44**, and PMBN of the checkerboard results for *K. pneumoniae* ATCC13883 with rifampicin as shown in Figure S15. All minimal inhibitory concentrations (MICs) and minimal synergistic concentrations (MSCs) are in  $\mu\text{g/mL}$ .

|             | Structures                                                                          | MIC  | MSC  | MIC rif | MSC rif | FICI         |
|-------------|-------------------------------------------------------------------------------------|------|------|---------|---------|--------------|
| <b>1</b>    | 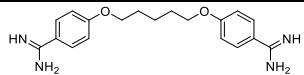   | >200 | 25   | >12     | 1.5     | $\leq 0.125$ |
| <b>3</b>    |    | >200 | 12.5 | >12     | 0.38    | $\leq 0.047$ |
| <b>21</b>   |    | >200 | 12.5 | >12     | 1.5     | $\leq 0.094$ |
| <b>22</b>   |    | >200 | 25   | >12     | 0.38    | $\leq 0.078$ |
| <b>23b</b>  |    | >200 | 25   | >12     | 1.5     | $\leq 0.125$ |
| <b>37</b>   |   | >200 | 6.25 | >12     | 0.19    | $\leq 0.023$ |
| <b>38</b>   |  | >200 | 3.13 | >12     | 0.19    | $\leq 0.016$ |
| <b>43</b>   |  | >200 | 6.25 | >12     | 0.38    | $\leq 0.031$ |
| <b>44</b>   |  | >200 | 6.25 | >12     | 0.19    | $\leq 0.023$ |
| <b>PMBN</b> |                                                                                     | >200 | 3.13 | >12     | 1.5     | $\leq 0.070$ |

*P. aeruginosa* ATCC27853

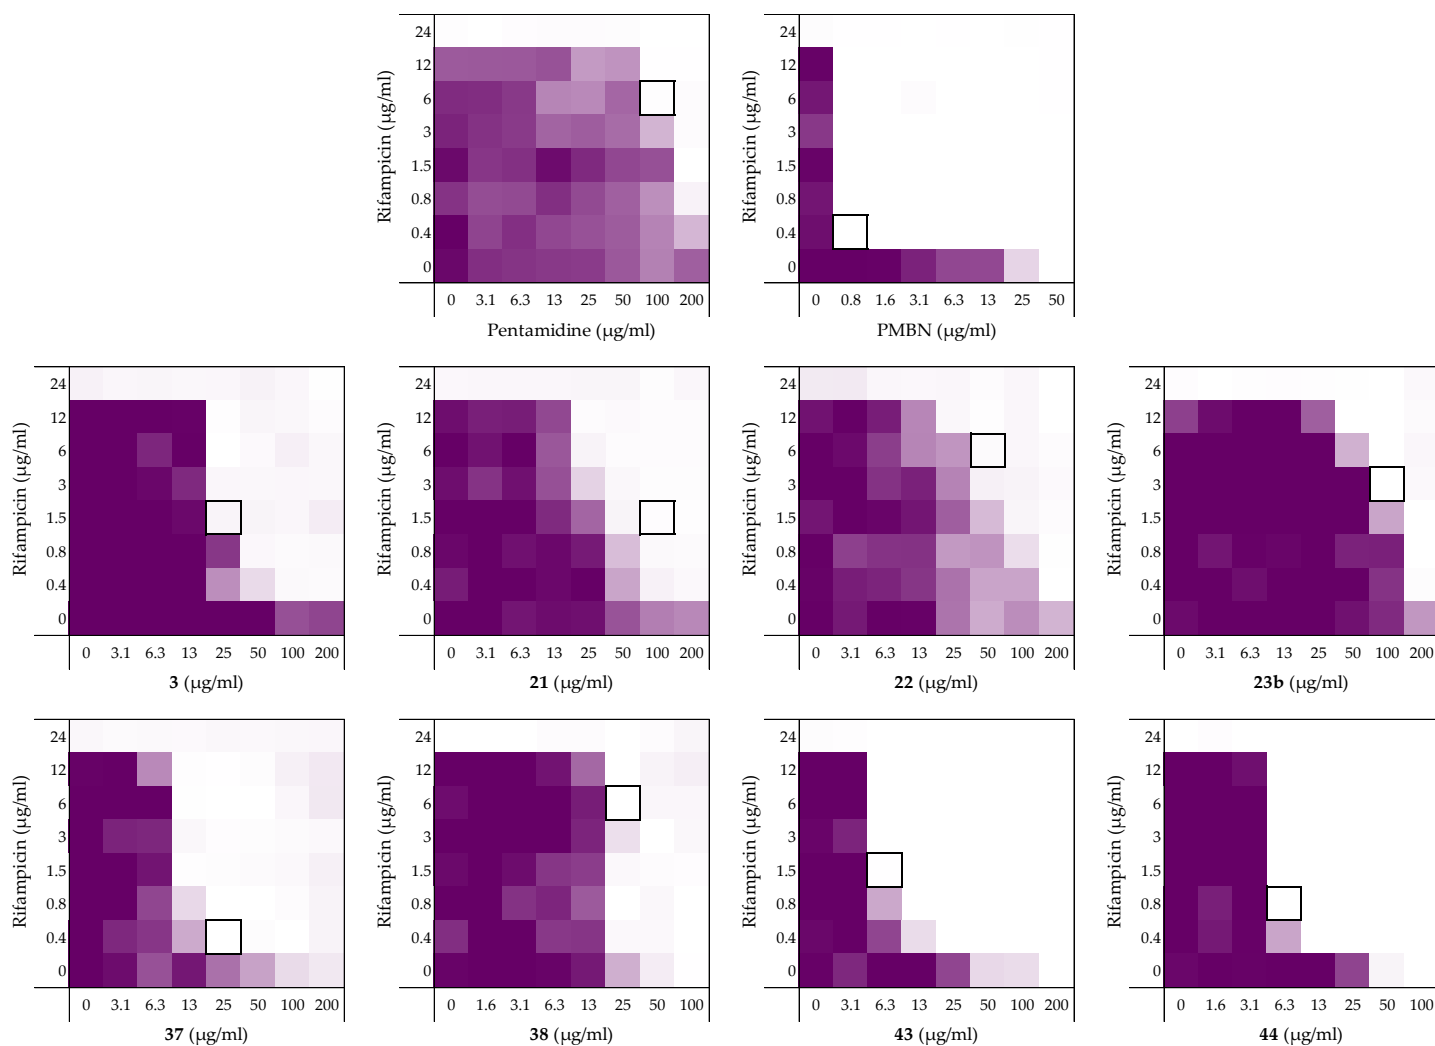

**Figure S16** Checkerboard assays of compounds **1**, **3**, **21**, **22**, **23b**, **37**, **38**, **43**, **44**, and PMBN in combination with rifampicin versus *P. aeruginosa* ATCC27853. OD<sub>600</sub> values were measured using a plate reader and transformed to a gradient: purple represents growth, white represents no growth. In each case, the bounded box in the checkerboard assays indicates the minimal synergistic concentration (MSC) of compound and antibiotic resulting in the lowest FICI.

**Table S16** Synergistic data of compounds **1**, **3**, **21**, **22**, **23b**, **37**, **38**, **43**, **44**, and PMBN of the checkerboard results for *P. aeruginosa* ATCC27853 with rifampicin as shown in Figure S16. All minimal inhibitory concentrations (MICs) and minimal synergistic concentrations (MSCs) are in  $\mu\text{g/mL}$ .

|             | Structures                                                                          | MIC  | MSC  | MIC rif | MSC rif | FICI         |
|-------------|-------------------------------------------------------------------------------------|------|------|---------|---------|--------------|
| <b>1</b>    | 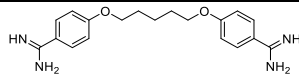   | >200 | 100  | 24      | 6       | $\leq 0.500$ |
| <b>3</b>    |    | >200 | 25   | 24      | 1.5     | $\leq 0.125$ |
| <b>21</b>   |    | >200 | 100  | 24      | 1.5     | $\leq 0.313$ |
| <b>22</b>   |    | >200 | 50   | >24     | 6       | $\leq 0.250$ |
| <b>23b</b>  |    | >200 | 100  | 24      | 3       | $\leq 0.375$ |
| <b>37</b>   |   | >200 | 25   | 24      | 0.38    | $\leq 0.078$ |
| <b>38</b>   |  | 100  | 25   | 24      | 6       | 0.500        |
| <b>43</b>   |  | 200  | 6.25 | 24      | 1.5     | 0.094        |
| <b>44</b>   |  | 100  | 6.25 | 24      | 0.75    | 0.094        |
| <b>PMBN</b> |                                                                                     | 50   | 0.78 | 24      | 0.38    | 0.031        |

## Hemolysis assay

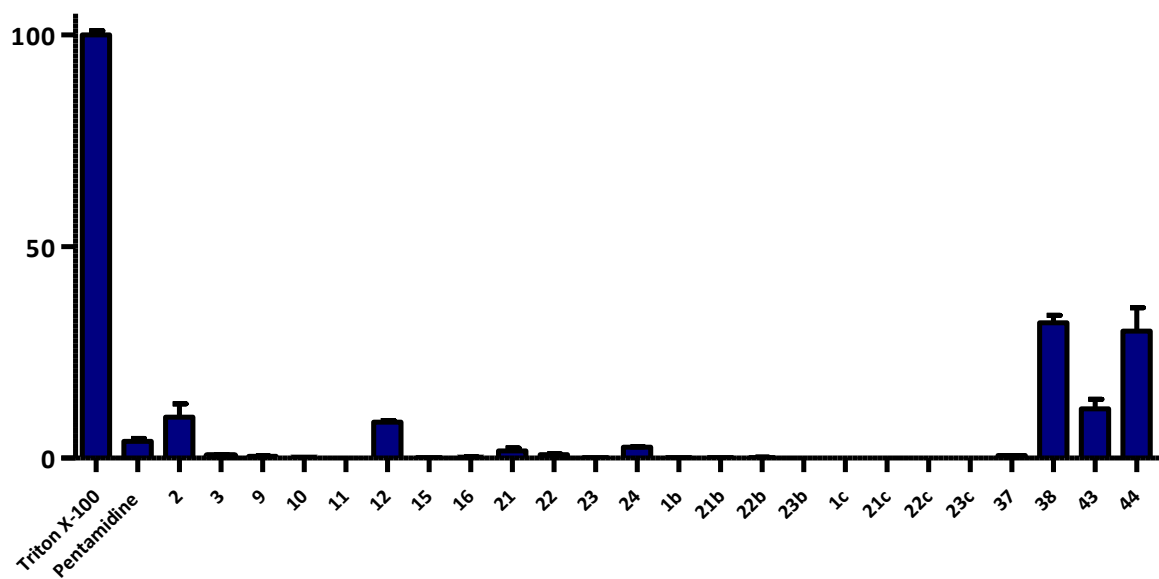

**Figure S17** Hemolytic activity of all compounds (200  $\mu\text{g/mL}$ ) after 1 hour of incubation. The hemolysis assay was performed as described in materials and methods. Values below 10% were defined as non-hemolytic.<sup>6</sup> Error bars represent the standard deviation based on n=3 technical replicates.

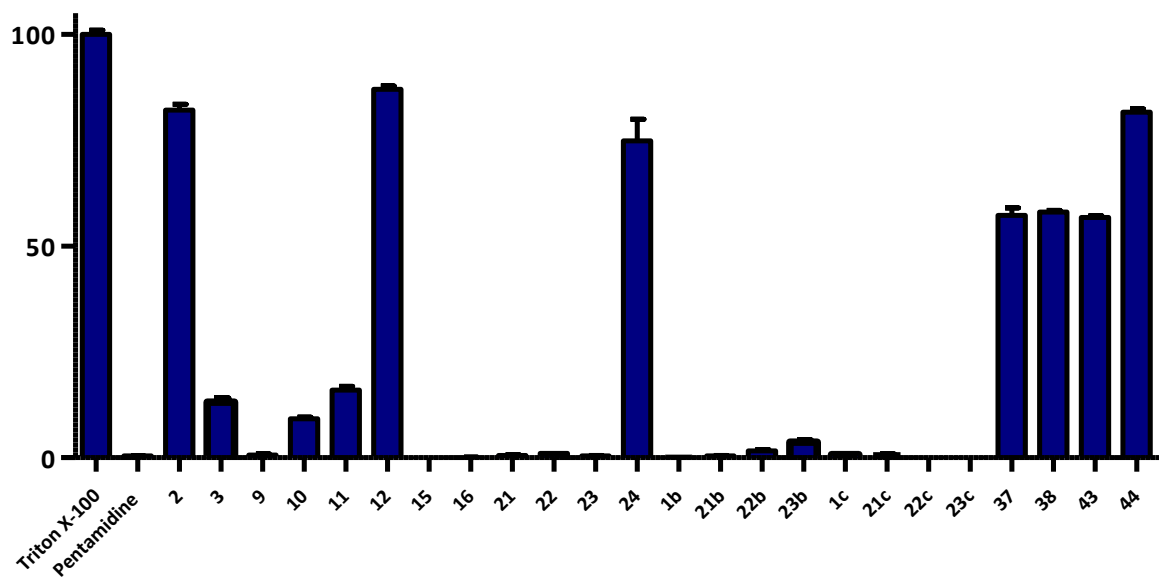

**Figure S18** Hemolytic activity of all compounds (200  $\mu\text{g/mL}$ ) after 20 hours of incubation. The hemolysis assay was performed as described in materials and methods. Values below 10% were defined as non-hemolytic.<sup>6</sup> Error bars represent the standard deviation based on n=3 technical replicates.

**Table S17** Hemolytic activity of all compounds (200  $\mu\text{g/mL}$ ). The hemolysis assay was performed as described in materials and methods. Values below 10% were defined as non-hemolytic.<sup>6</sup>

|     | Structures | Hemolysis 1 hour (%) | Hemolysis 20 hours (%) |
|-----|------------|----------------------|------------------------|
| 1   |            | 4.0                  | 0.4                    |
| 2   |            | 9.7                  | 82                     |
| 3   |            | 0.5                  | 13                     |
| 9   |            | 0.4                  | 0.6                    |
| 10  |            | 0.3                  | 9.2                    |
| 11  |            | 0.0                  | 16                     |
| 12  |            | 8.5                  | 87                     |
| 15  |            | 0.2                  | 0.0                    |
| 16  |            | 0.2                  | 0.1                    |
| 21  |            | 1.7                  | 0.5                    |
| 22  |            | 0.9                  | 1.1                    |
| 23  |            | 0.2                  | 0.4                    |
| 24  |            | 2.6                  | 75                     |
| 1b  |            | 0.1                  | 0.1                    |
| 21b |            | 0.1                  | 0.4                    |

|            |                                                                                     |     |     |
|------------|-------------------------------------------------------------------------------------|-----|-----|
| <b>22b</b> | 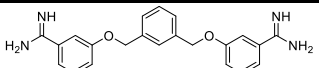   | 0.2 | 1.6 |
| <b>23b</b> |    | 0.0 | 3.7 |
| <b>1c</b>  |    | 0.0 | 0.7 |
| <b>21c</b> |    | 0.0 | 0.4 |
| <b>22c</b> |    | 0.0 | 0.0 |
| <b>23c</b> |    | 0.0 | 0.0 |
| <b>37</b>  |    | 0.6 | 57  |
| <b>38</b>  |   | 32  | 58  |
| <b>43</b>  |  | 12  | 57  |
| <b>44</b>  |  | 30  | 82  |

## Outer membrane permeability assay

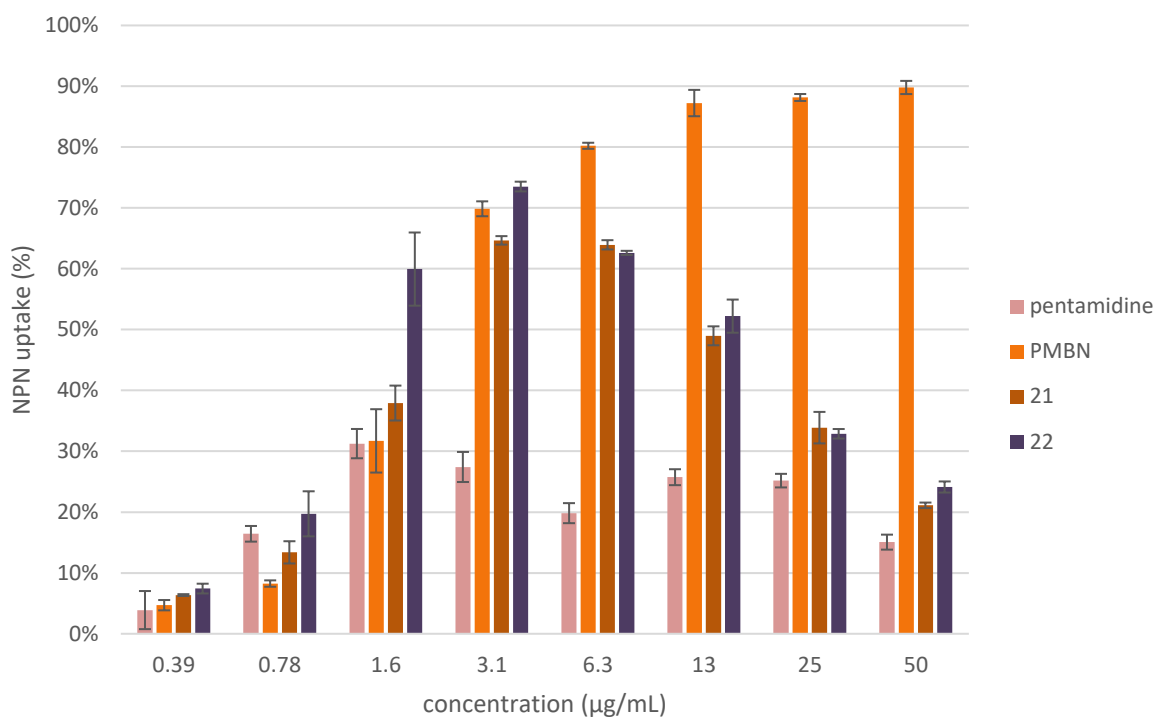

**Figure S19** Outer membrane permeabilization assay of compounds **1**, **21**, **22**, and PMBN with *E.coli* BW25113 using *N*-phenyl-naphthalen-1-amine (NPN) (at 0.01 mM) as fluorescent probe. The read-out was performed using a plate reader with  $\lambda_{\text{ex}}$  355 nm and  $\lambda_{\text{em}}$  420 nm. The NPN uptake values shown are relative to the uptake signal obtained upon treating the cells with 100 µg/mL colistin as previously reported.<sup>7</sup> Error bars represent the standard deviation based on n=3 technical replicates. Of note is the maximum NPN fluorescence measured for pentamidine and bis-amidines **21** and **22** at 3.1 µg/mL (0.01 mM). At higher bis-amidines concentrations, NPN fluorescence decreases, an effect not observed for PMBN.



## Compound characterization and analysis

### HRMS characterization

**Table S18** Overview of the HRMS results obtained using a Shimadzu Nexera X2 UHPLC system with a Waters Acquity HSS C18 column (2.1 × 100 mm, 1.8 μm) at 30 °C and equipped with a diode array detector. This system was connected to a Shimadzu 9030 QTOF mass spectrometer (ESI ionisation) calibrated internally with Agilent's API-TOF reference mass solution kit (5.0 mM purine, 100.0 mM ammonium trifluoroacetate and 2.5 mM hexakis(1H,1H,3H-tetrafluoropropoxy)phosphazine) diluted to achieve a mass count of 10000.

|    | Structures |                                                                 | [M+H] <sup>+</sup> calculated | [M+H] <sup>+</sup> found |
|----|------------|-----------------------------------------------------------------|-------------------------------|--------------------------|
| 1  |            | C <sub>19</sub> H <sub>24</sub> N <sub>4</sub> O <sub>2</sub>   | 341.1977                      | 341.1977                 |
| 2  |            | C <sub>23</sub> H <sub>32</sub> N <sub>4</sub> O <sub>2</sub>   | 397.2604                      | 397.2597                 |
| 3  |            | C <sub>25</sub> H <sub>28</sub> N <sub>4</sub> O <sub>2</sub>   | 417.2291                      | 417.2287                 |
| 9  |            | C <sub>17</sub> H <sub>20</sub> N <sub>4</sub> O <sub>2</sub>   | 313.1664                      | 313.1662                 |
| 10 |            | C <sub>21</sub> H <sub>28</sub> N <sub>4</sub> O                | 369.2290                      | 369.2290                 |
| 11 |            | C <sub>22</sub> H <sub>30</sub> N <sub>4</sub> O <sub>2</sub>   | 383.2447                      | 383.2446                 |
| 12 |            | C <sub>25</sub> H <sub>36</sub> N <sub>4</sub> O <sub>2</sub>   | 425.2916                      | 425.2919                 |
| 15 |            | C <sub>18</sub> H <sub>22</sub> N <sub>4</sub> O <sub>2</sub> S | 359.1541                      | 359.1541                 |
| 16 |            | C <sub>18</sub> H <sub>22</sub> N <sub>4</sub> O <sub>4</sub> S | 391.1441                      | 391.1434                 |
| 21 |            | C <sub>22</sub> H <sub>22</sub> N <sub>4</sub> O <sub>2</sub>   | 375.1821                      | 375.1821                 |
| 22 |            | C <sub>22</sub> H <sub>22</sub> N <sub>4</sub> O <sub>2</sub>   | 375.1821                      | 375.1821                 |
| 23 |            | C <sub>22</sub> H <sub>22</sub> N <sub>4</sub> O <sub>2</sub>   | 375.1821                      | 375.1820                 |
| 24 |            | C <sub>26</sub> H <sub>24</sub> N <sub>4</sub> O <sub>2</sub>   | 425.1977                      | 425.1977                 |

|            |                                                                                     |              |          |          |
|------------|-------------------------------------------------------------------------------------|--------------|----------|----------|
| <b>1b</b>  | 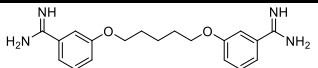   | C19H24N4O2   | 341.1977 | 341.1977 |
| <b>21b</b> |    | C22H22N4O2   | 375.1821 | 375.1821 |
| <b>22b</b> |    | C22H22N4O2   | 375.1821 | 375.1821 |
| <b>23b</b> |    | C22H22N4O2   | 375.1821 | 375.1818 |
| <b>1c</b>  |    | C19H24N4O2   | 341.1977 | 341.1972 |
| <b>21c</b> |    | C22H22N4O2   | 375.1821 | 375.1815 |
| <b>22c</b> |    | C22H22N4O2   | 375.1821 | 375.1816 |
| <b>23c</b> |   | C22H22N4O2   | 375.1821 | 375.1816 |
| <b>37</b>  |  | C22H21BrN4O2 | 453.0926 | 453.0924 |
| <b>38</b>  |  | C28H26N4O2   | 451.2135 | 451.2130 |
| <b>43</b>  |  | C22H21BrN4O2 | 453.0926 | 453.0923 |
| <b>44</b>  |  | C28H26N4O2   | 451.2135 | 451.2129 |

### NMR data Compound 1 <sup>1</sup>H NMR (DMSO)

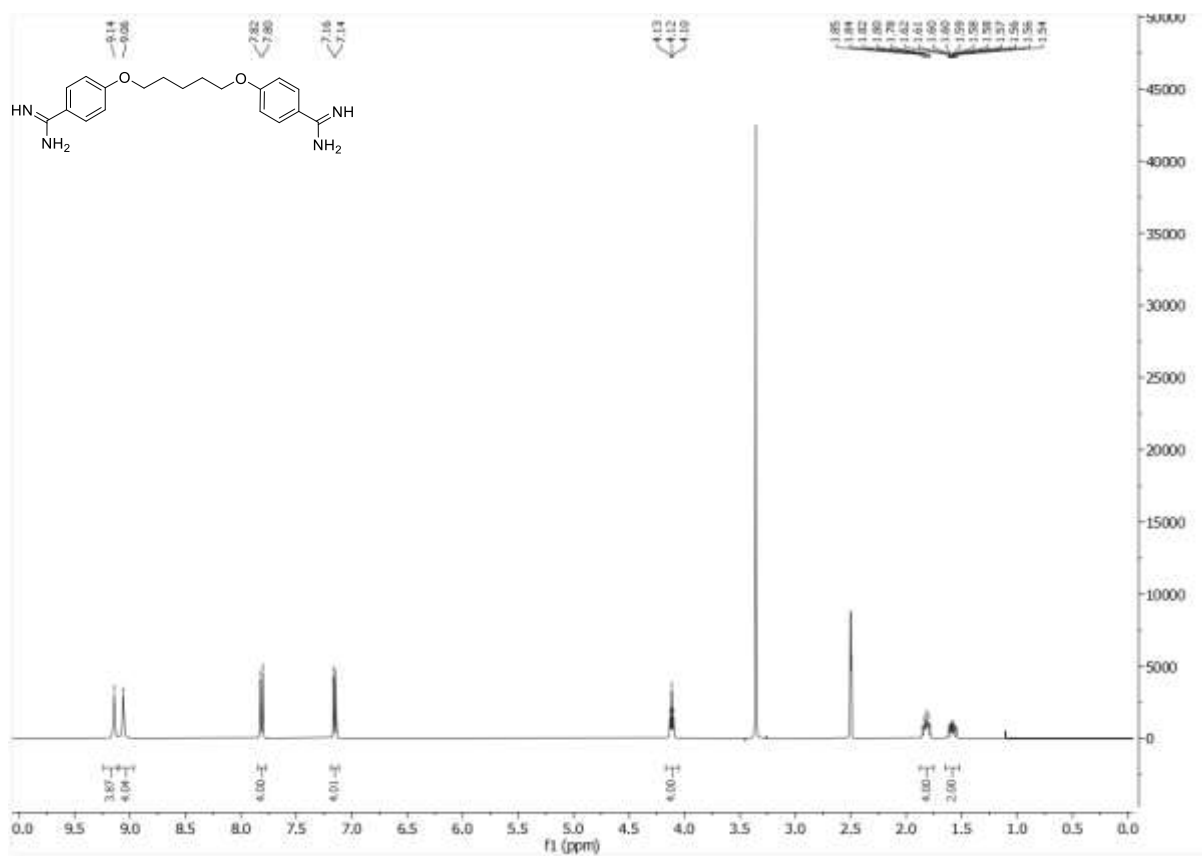

### <sup>13</sup>C NMR (DMSO)

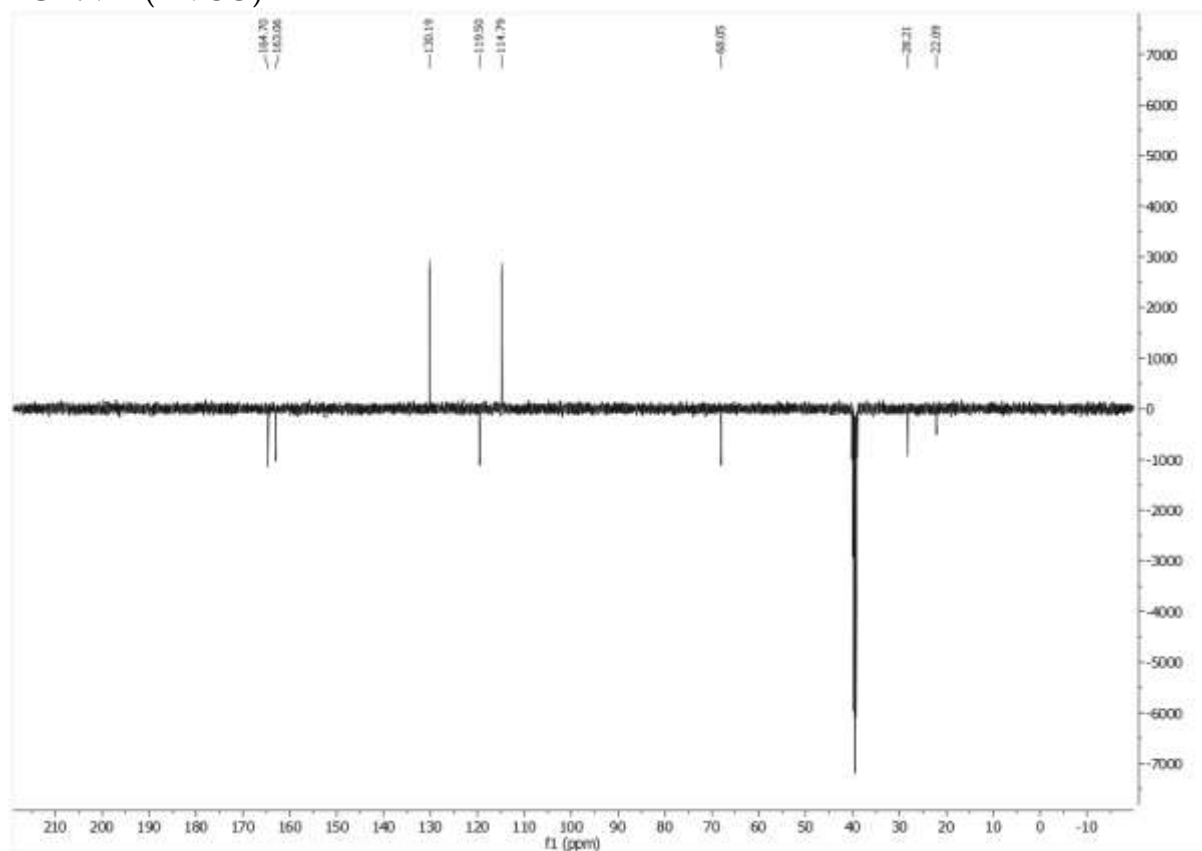

Compound 2 <sup>1</sup>H NMR (DMSO)

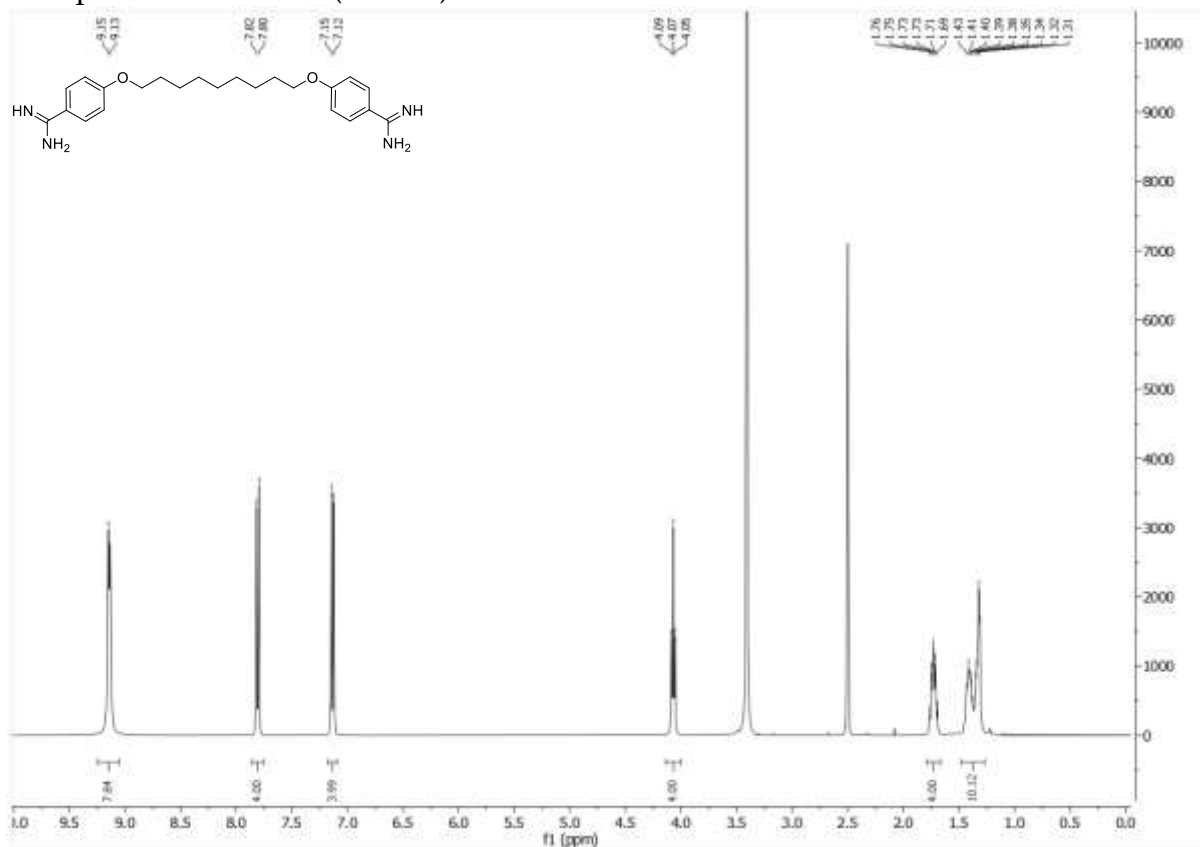

<sup>13</sup>C NMR (DMSO)

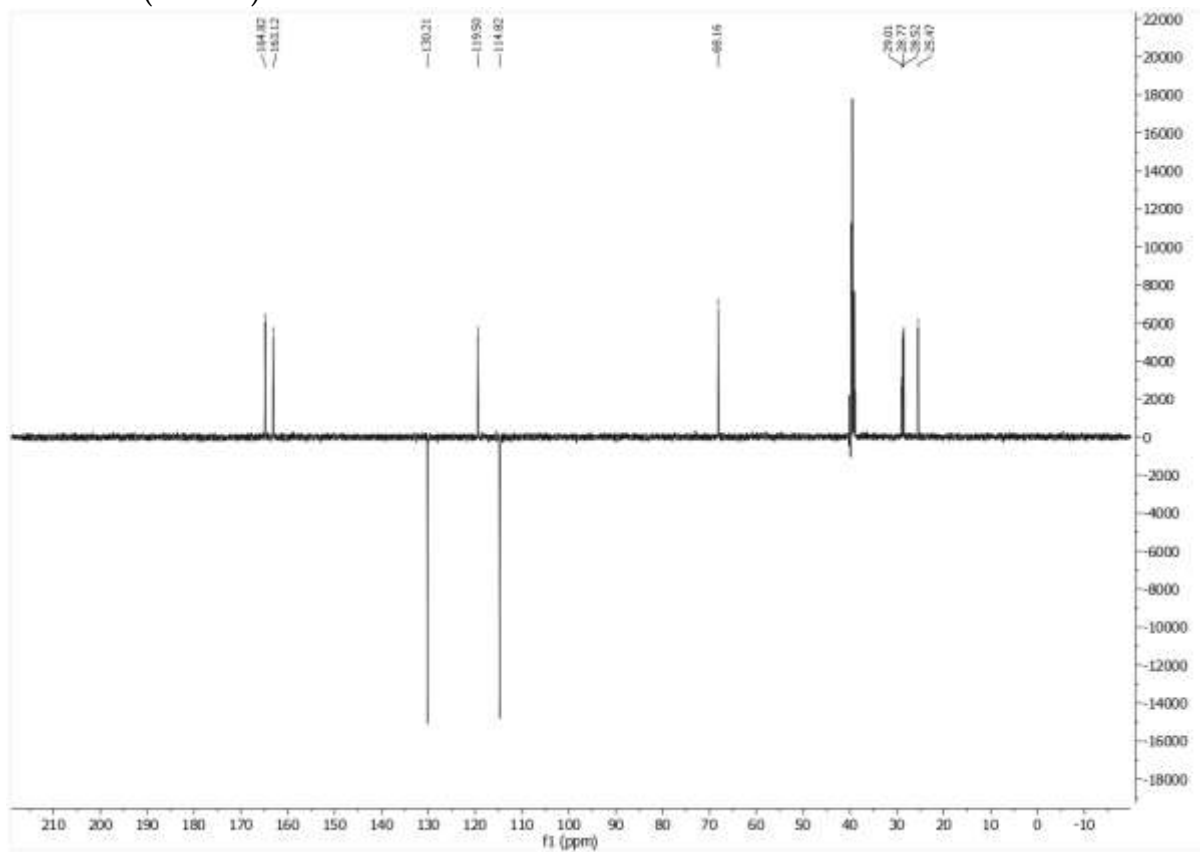

Compound 3 <sup>1</sup>H NMR (DMSO)

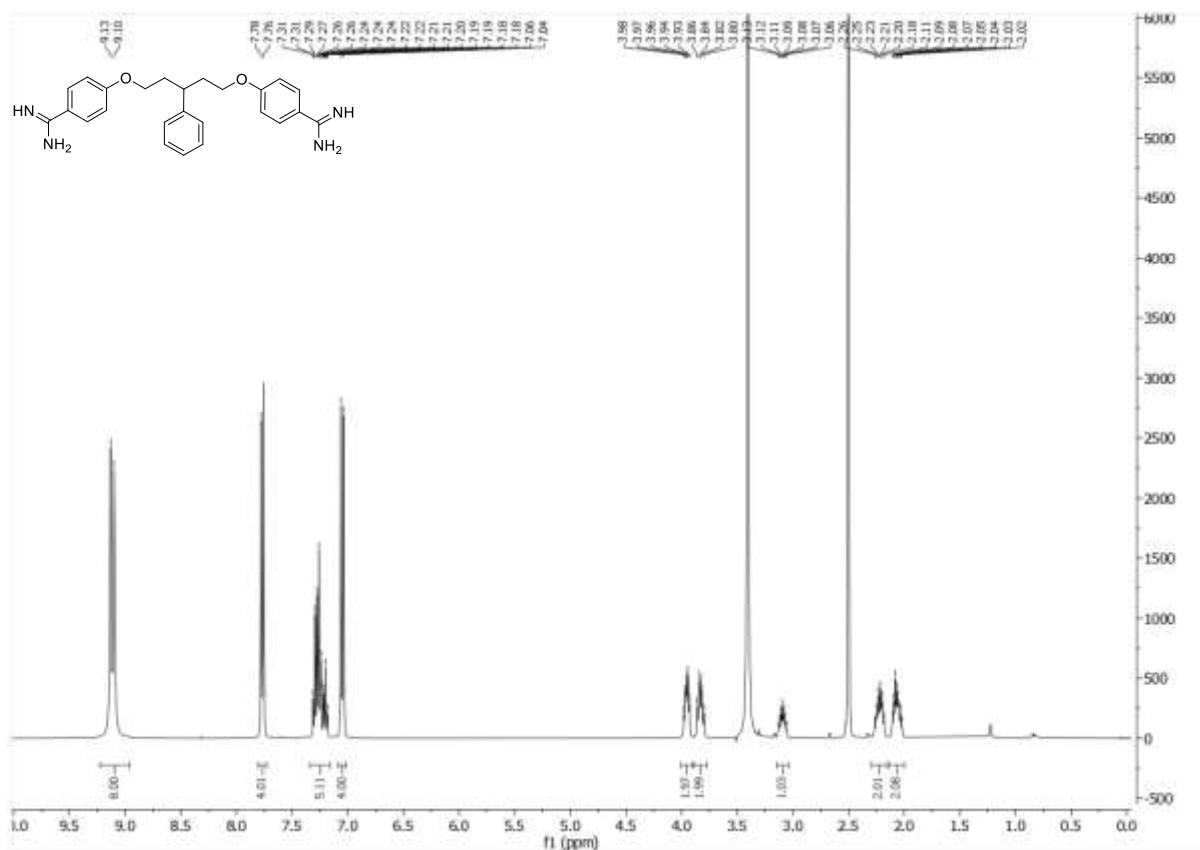

<sup>13</sup>C NMR (DMSO)

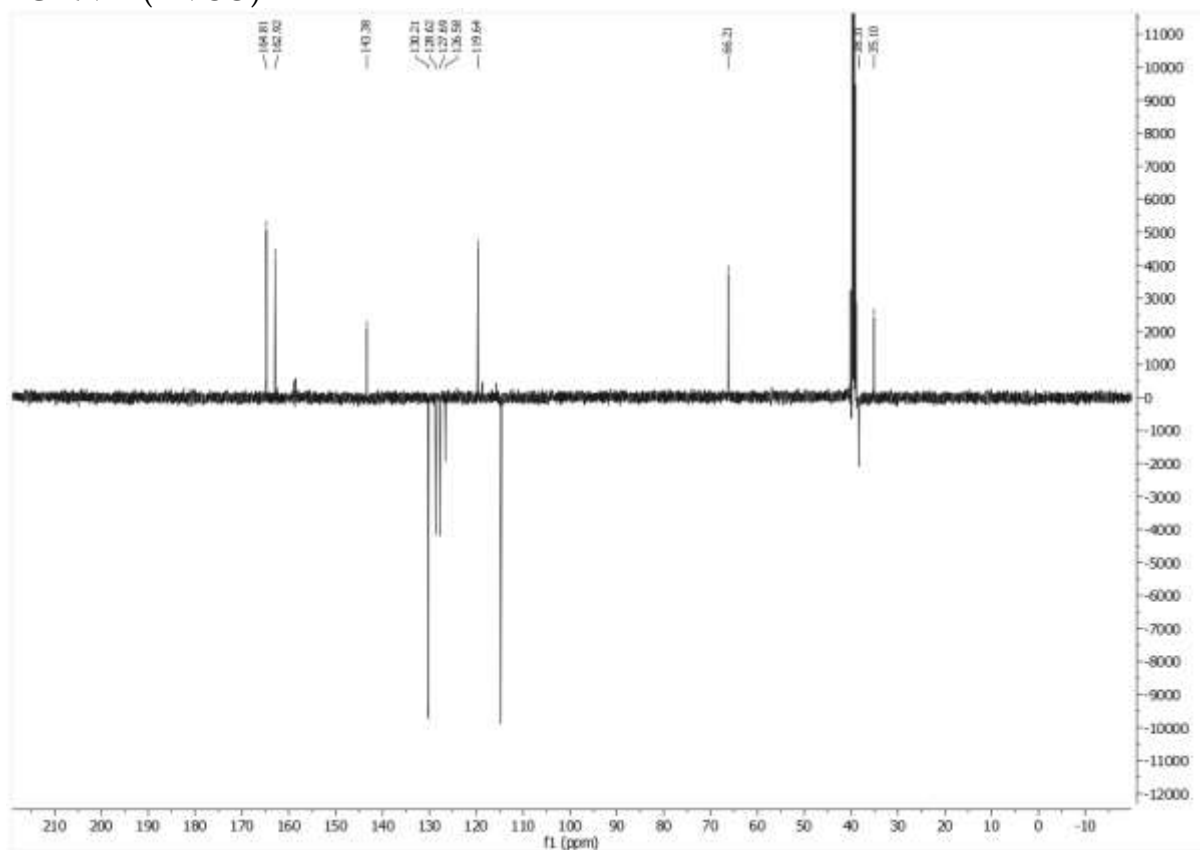

Compound 4  $^1\text{H}$  NMR ( $\text{CDCl}_3$ )

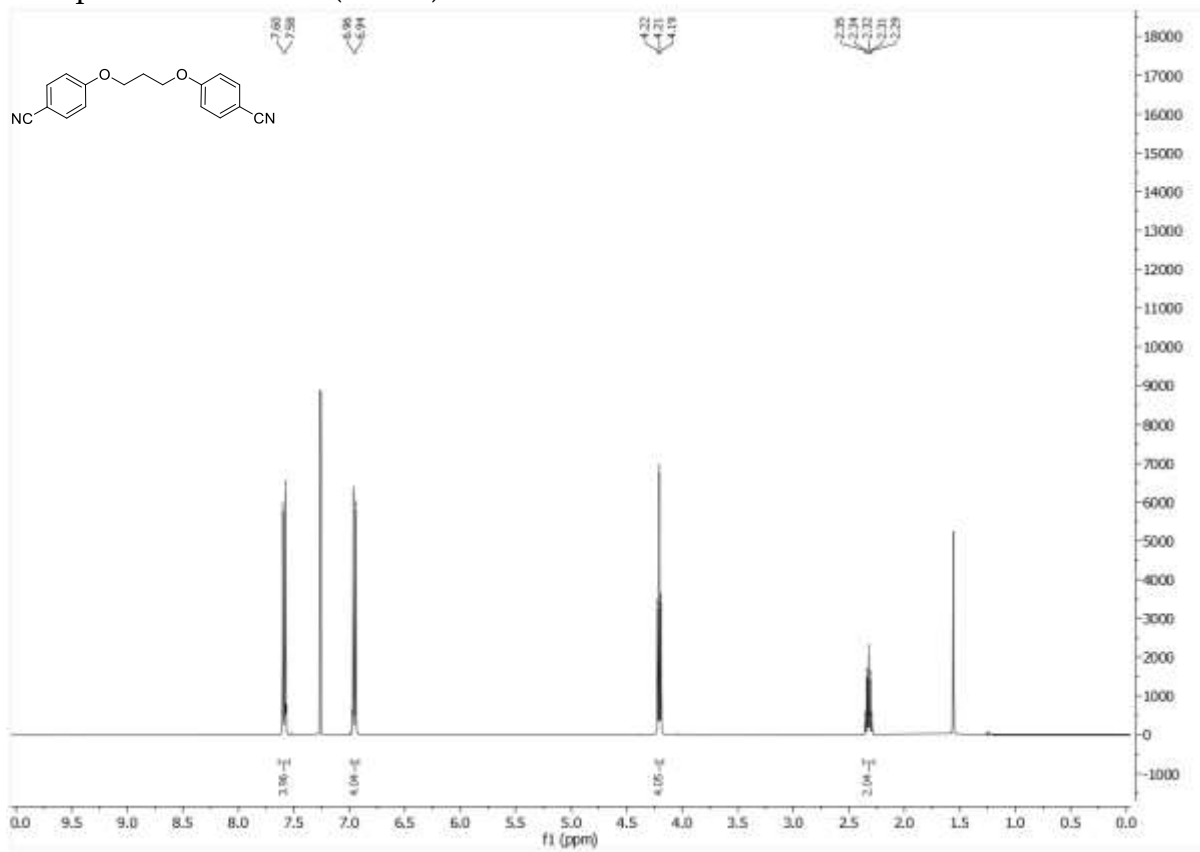

$^{13}\text{C}$  NMR ( $\text{CDCl}_3$ )

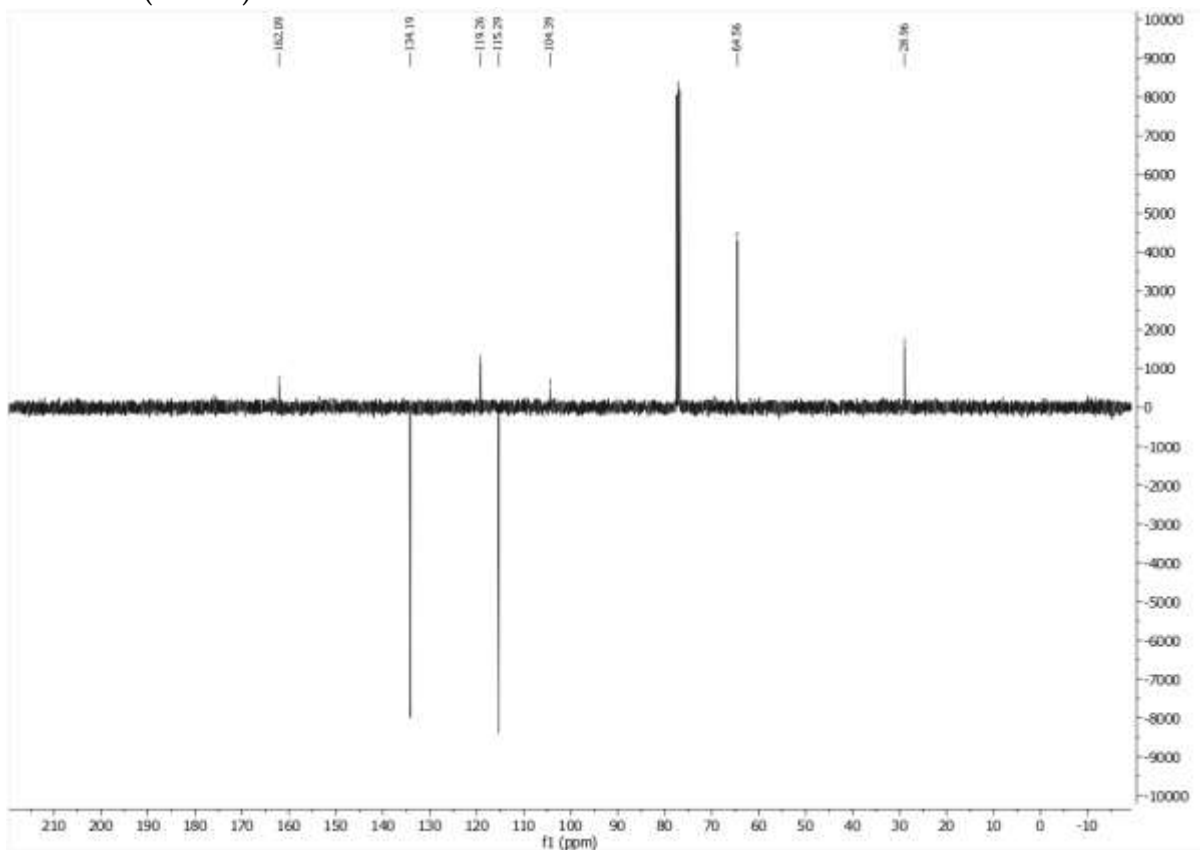

Compound 5 <sup>1</sup>H NMR (CDCl<sub>3</sub>)

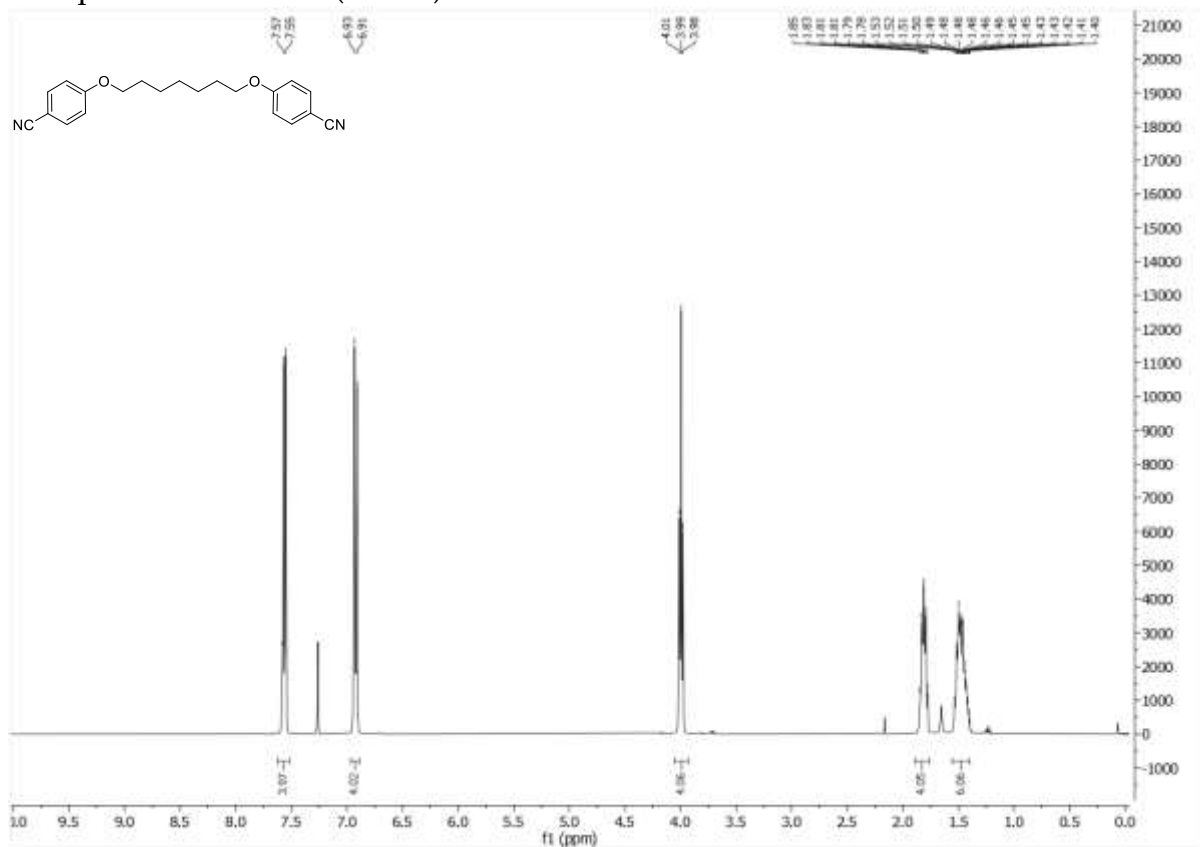

<sup>13</sup>C NMR (CDCl<sub>3</sub>)

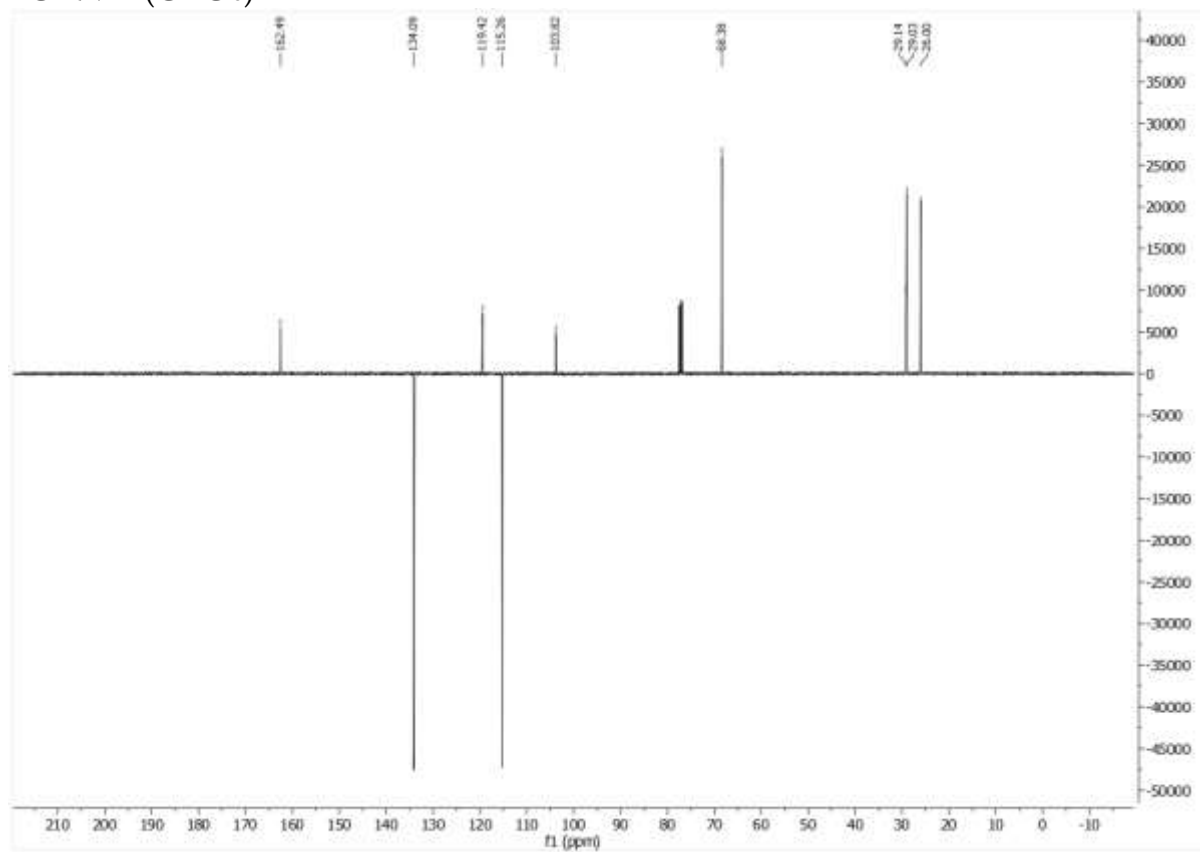

Compound 6  $^1\text{H}$  NMR ( $\text{CDCl}_3$ )

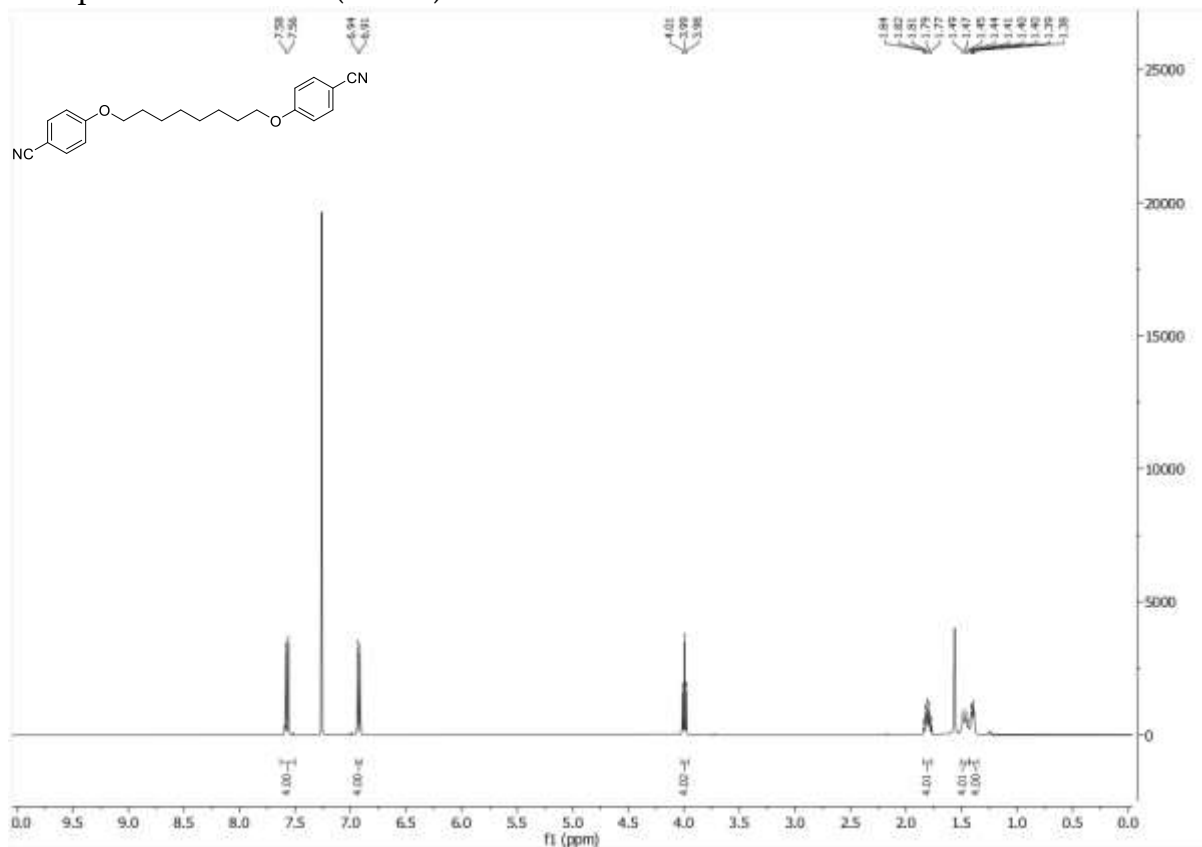

$^{13}\text{C}$  NMR ( $\text{CDCl}_3$ )

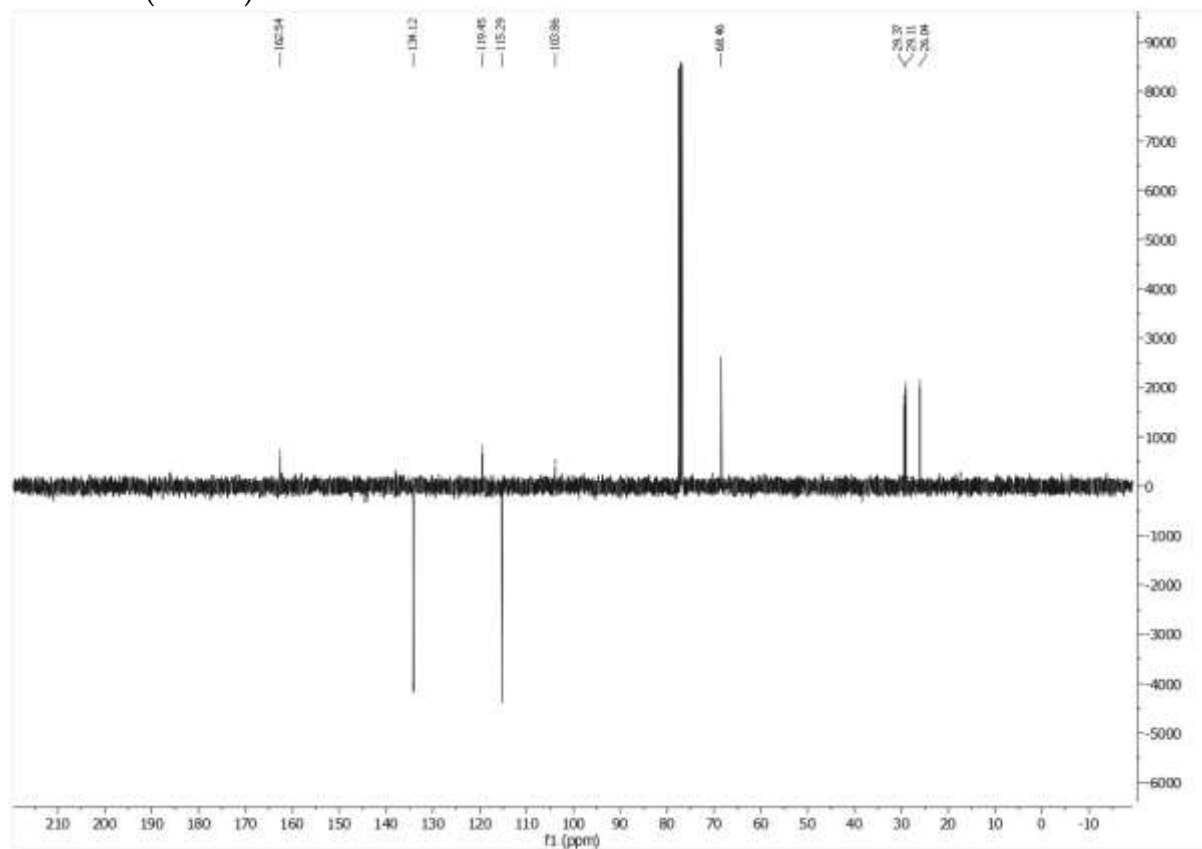



Compound 7 <sup>1</sup>H NMR (CDCl<sub>3</sub>)

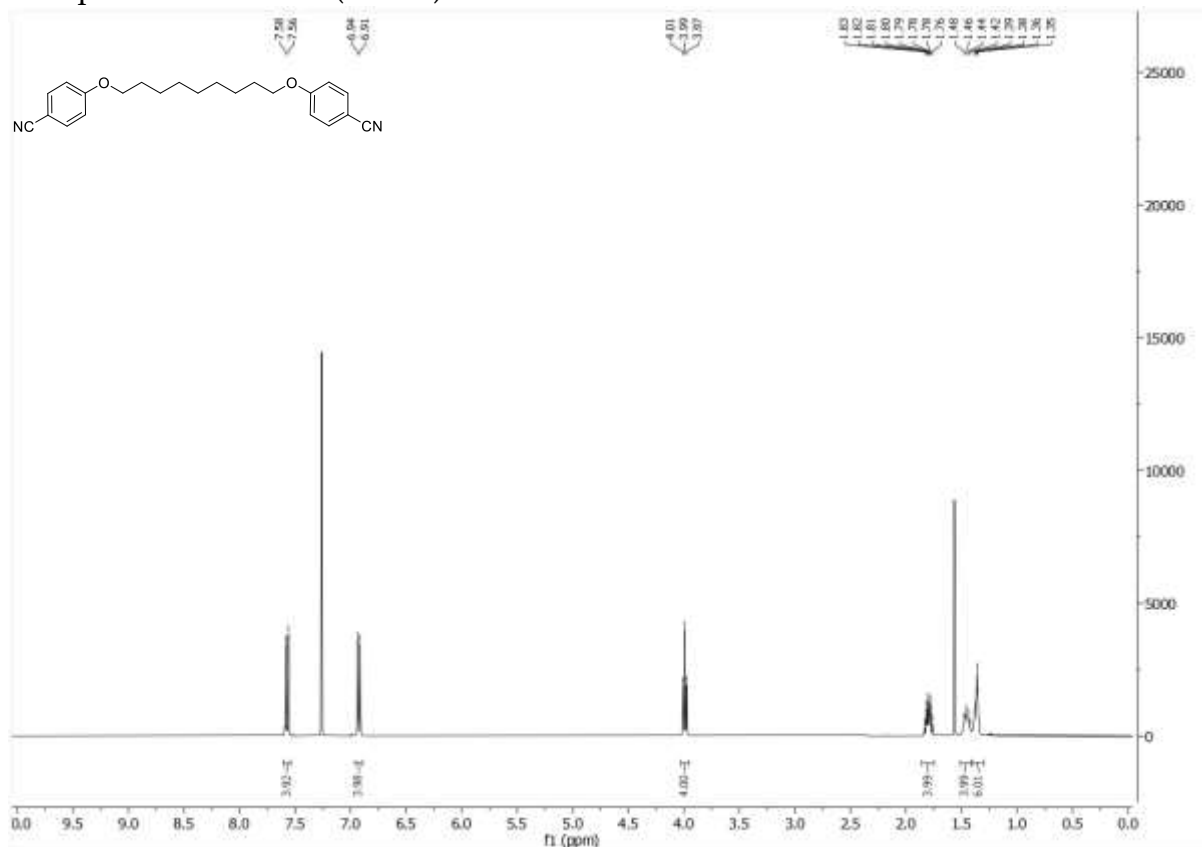

<sup>13</sup>C NMR (CDCl<sub>3</sub>)

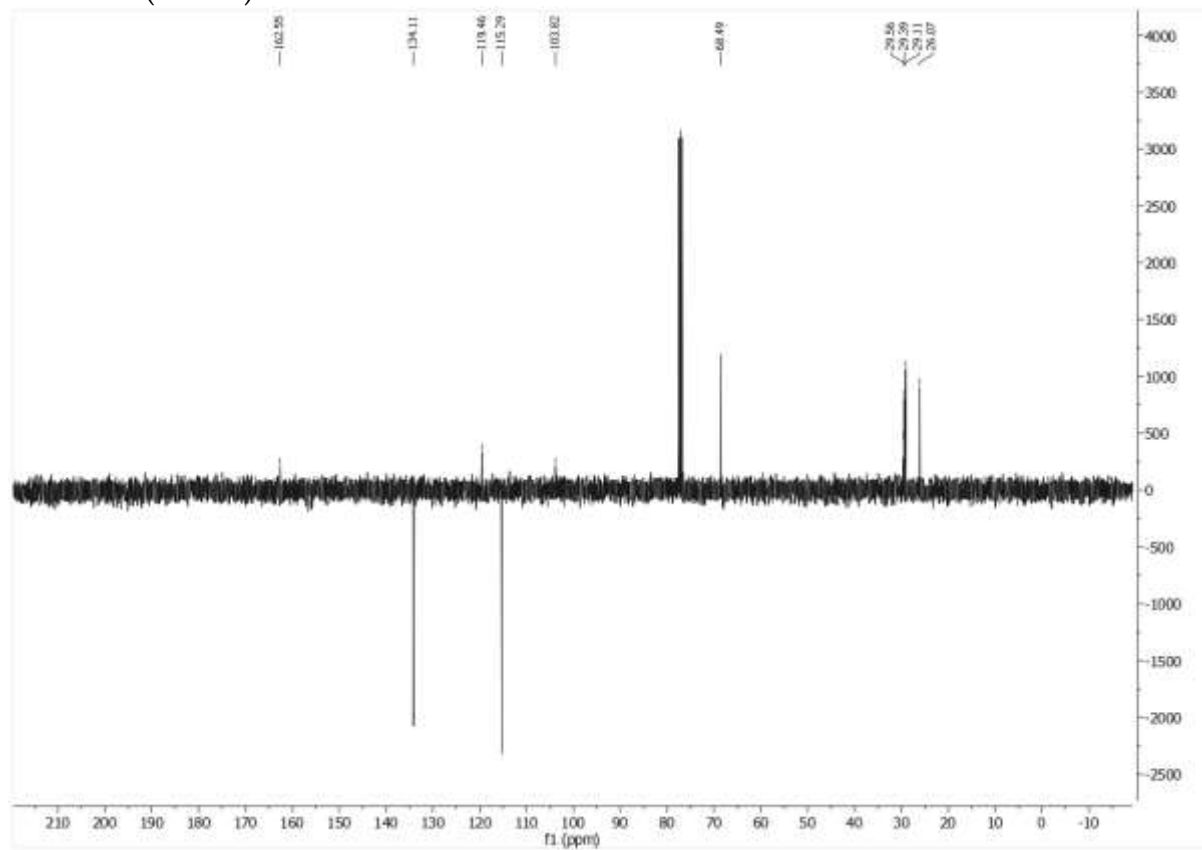

Compound 8 <sup>1</sup>H NMR (CDCl<sub>3</sub>)

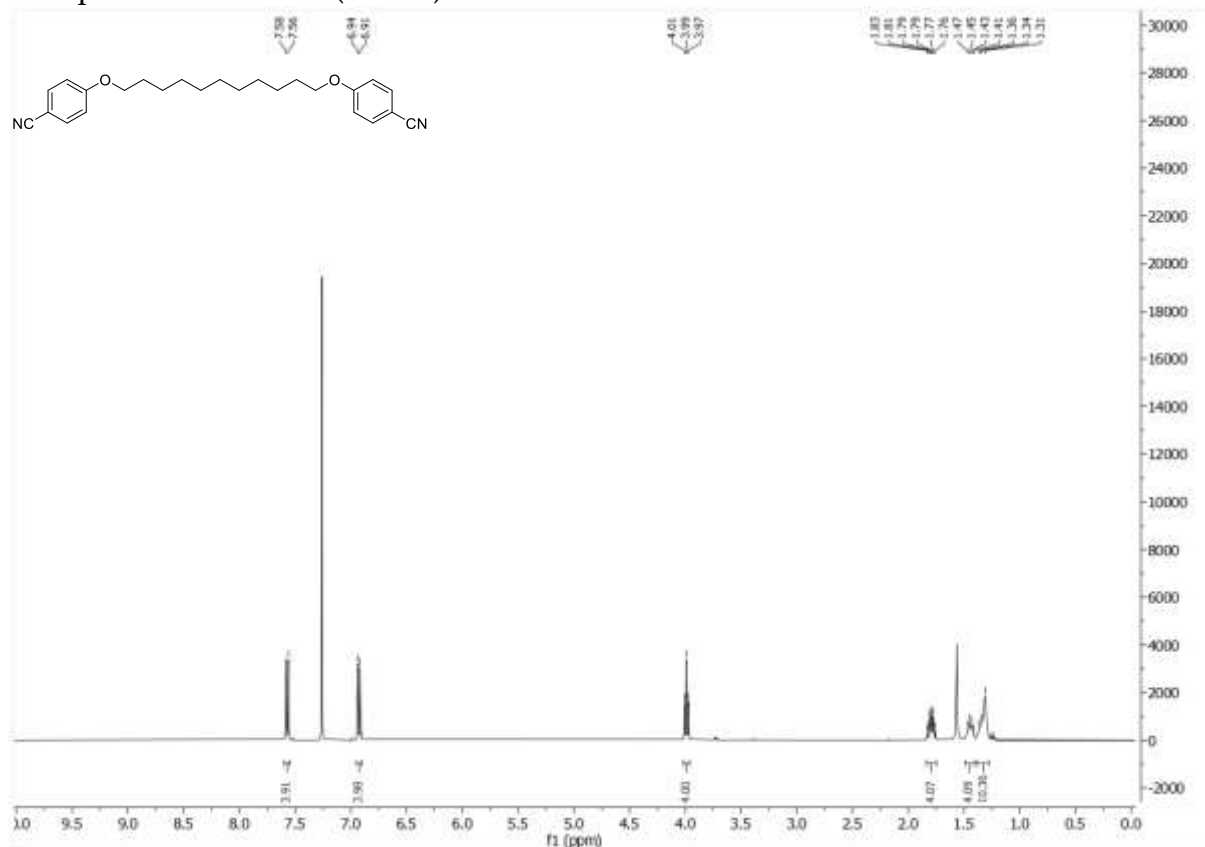

<sup>13</sup>C NMR (CDCl<sub>3</sub>)

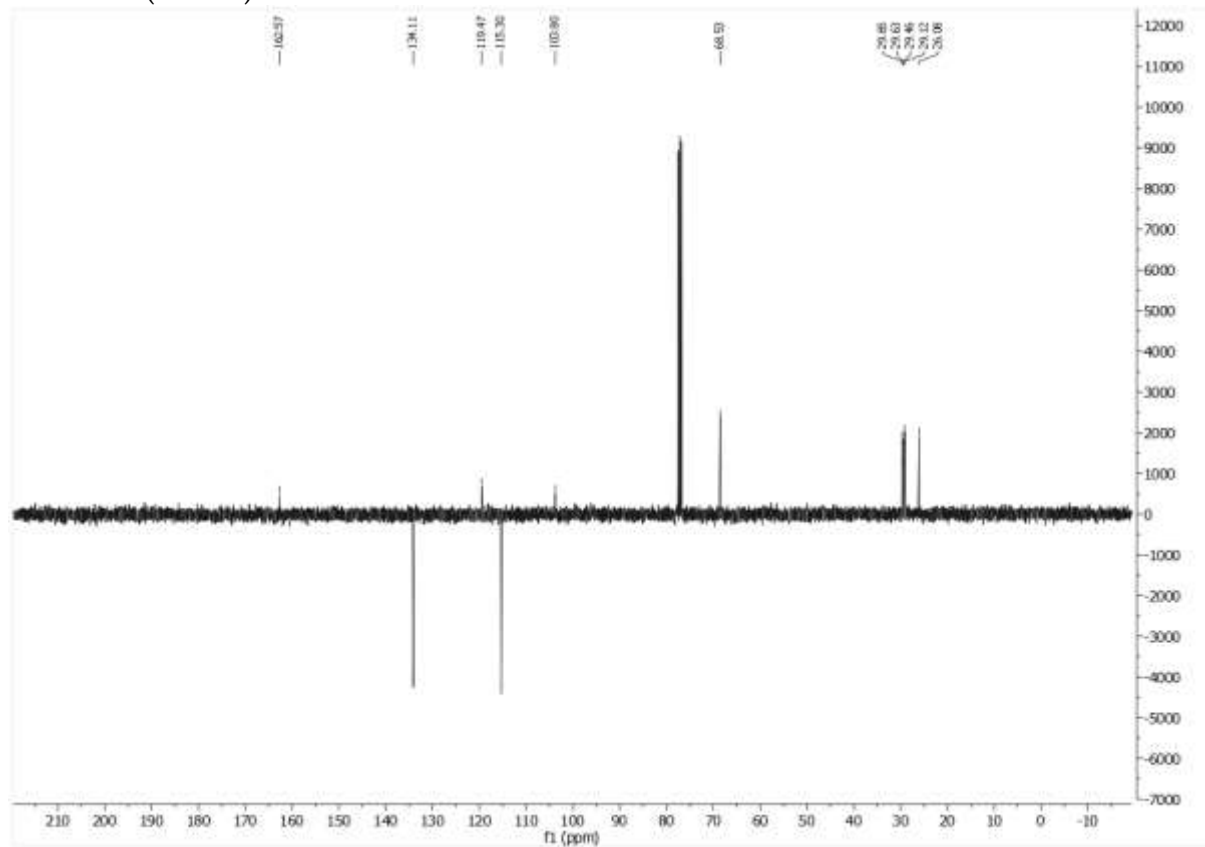

### Compound 9 <sup>1</sup>H NMR (DMSO)

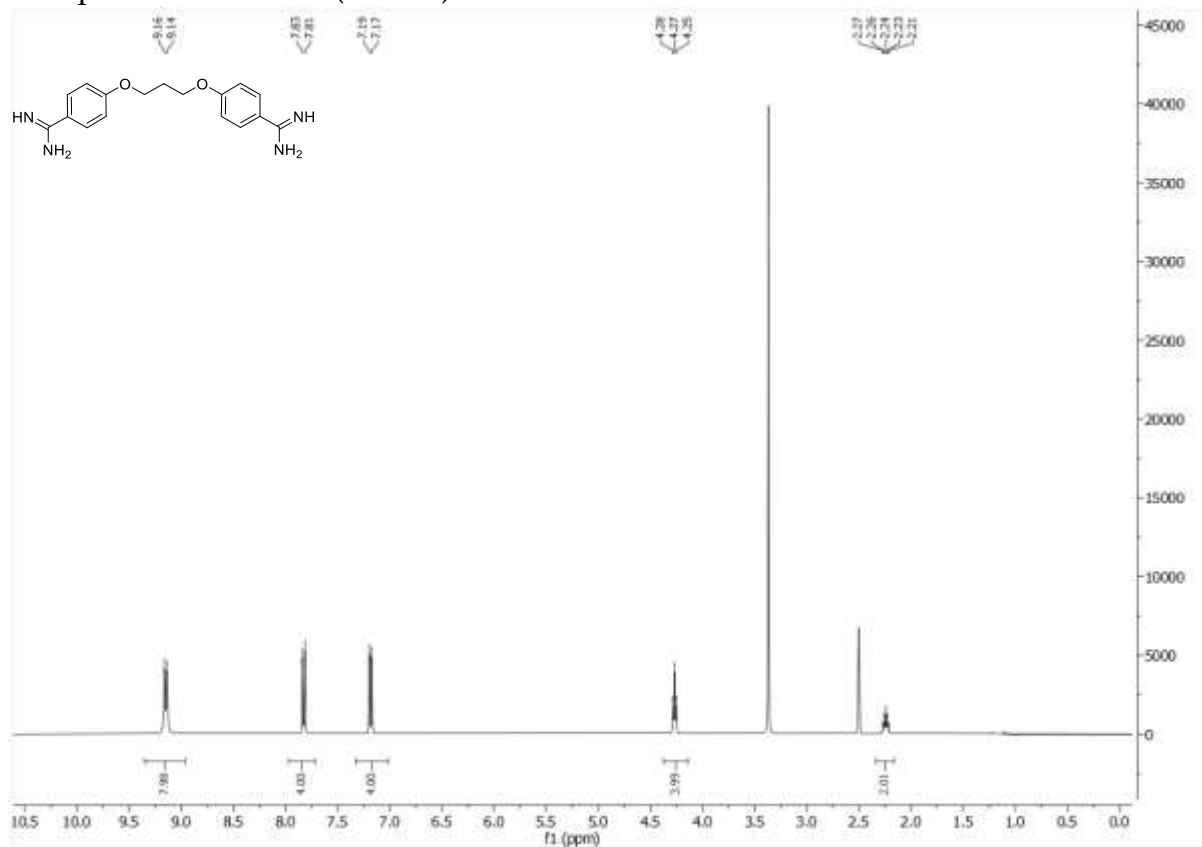

### <sup>13</sup>C NMR (DMSO)

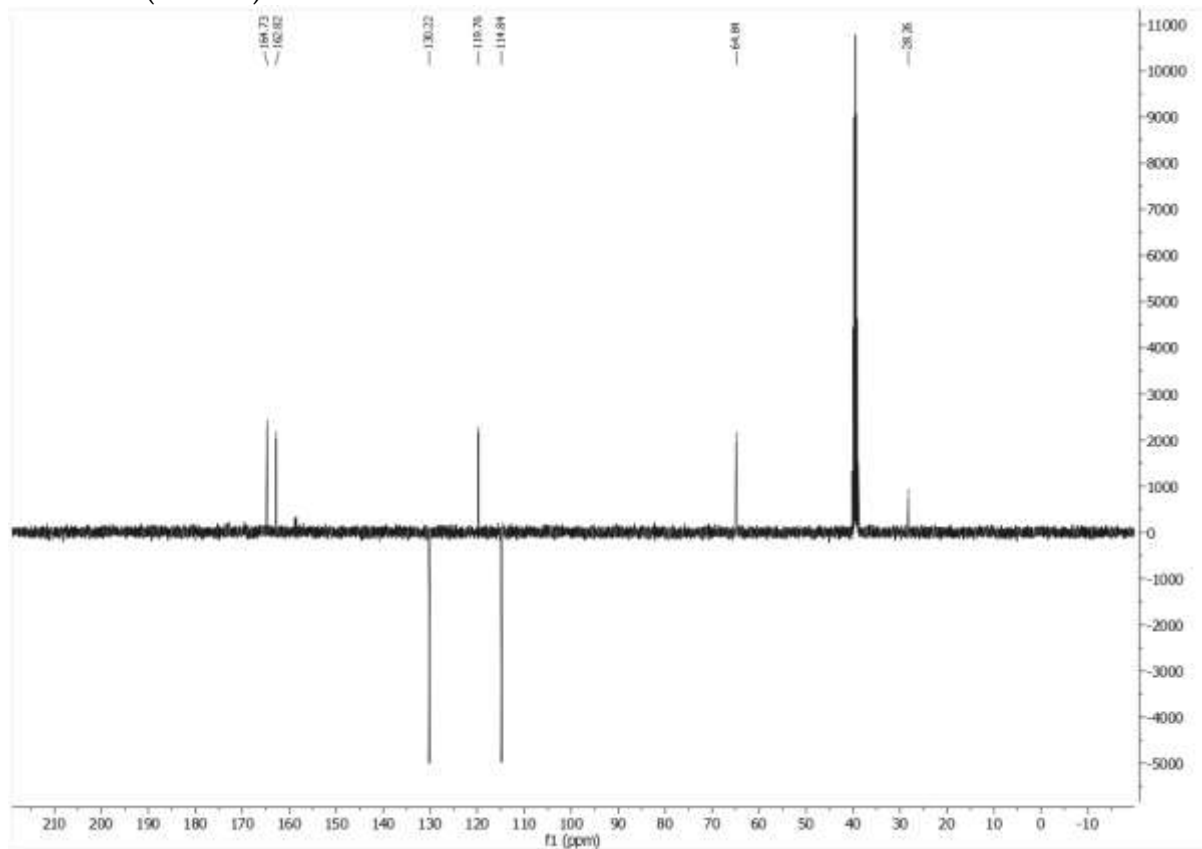

### Compound 10 <sup>1</sup>H NMR (DMSO)

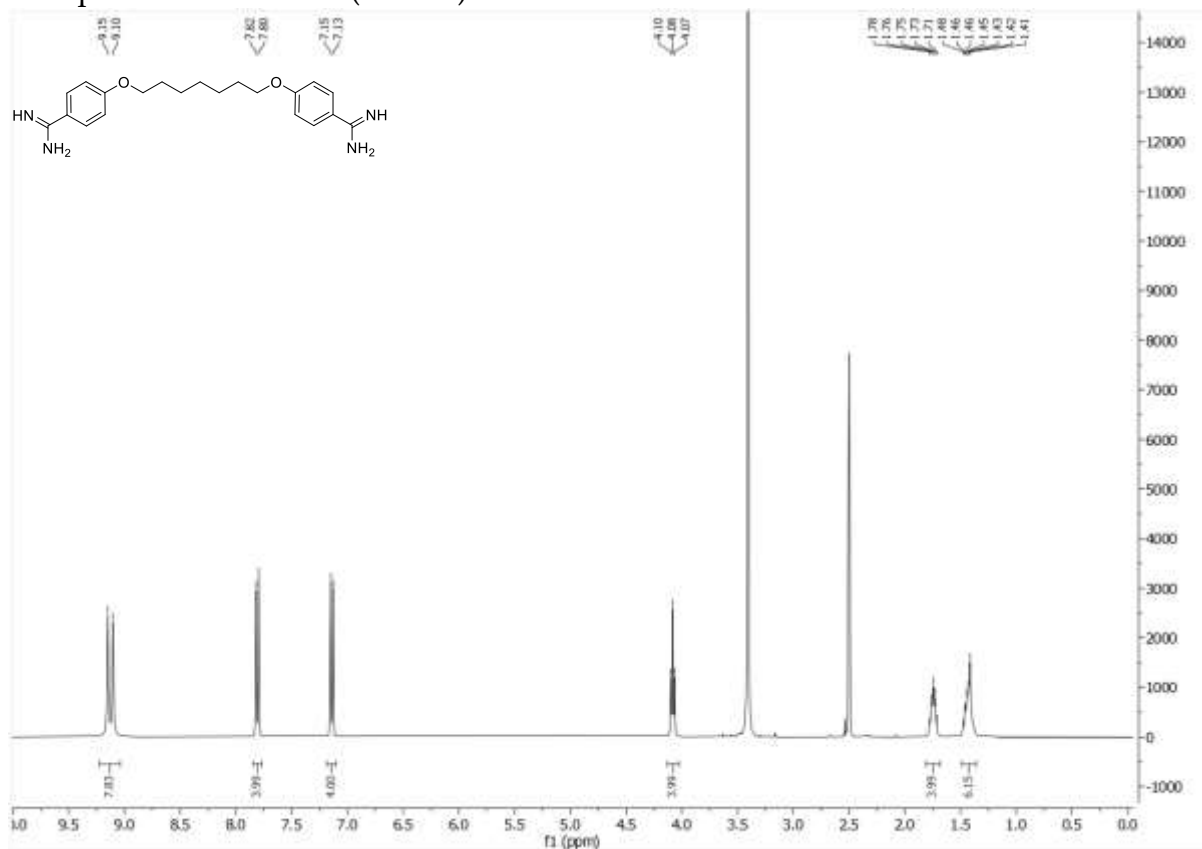

### <sup>13</sup>C NMR (DMSO)

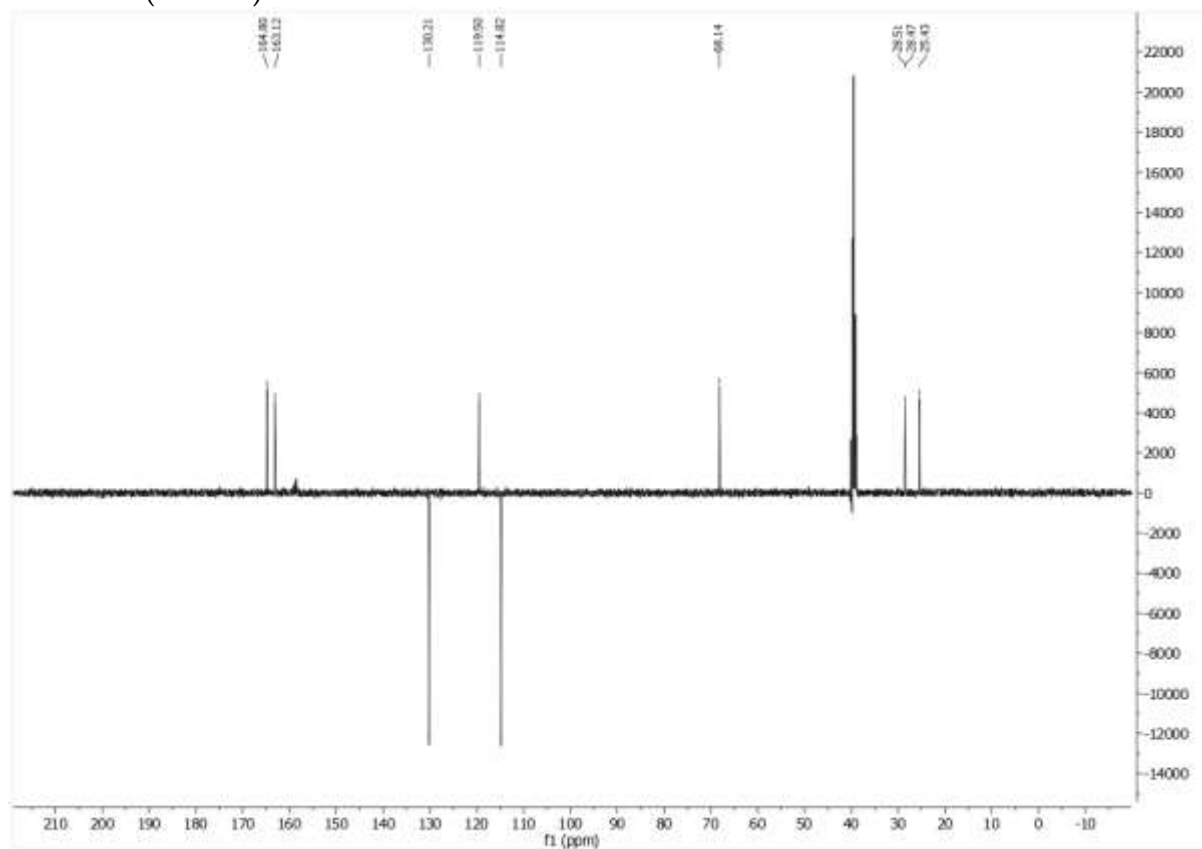

### Compound 11 <sup>1</sup>H NMR (DMSO)

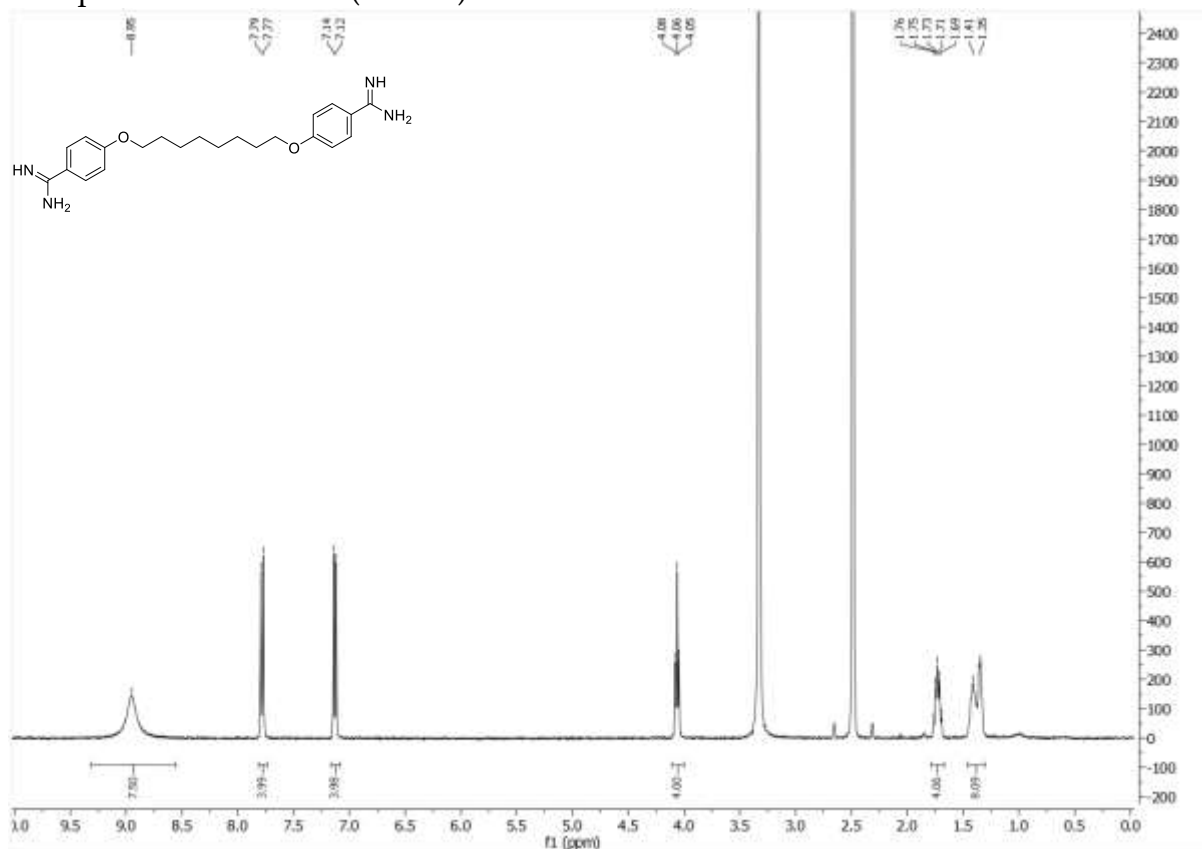

### <sup>13</sup>C NMR (DMSO)

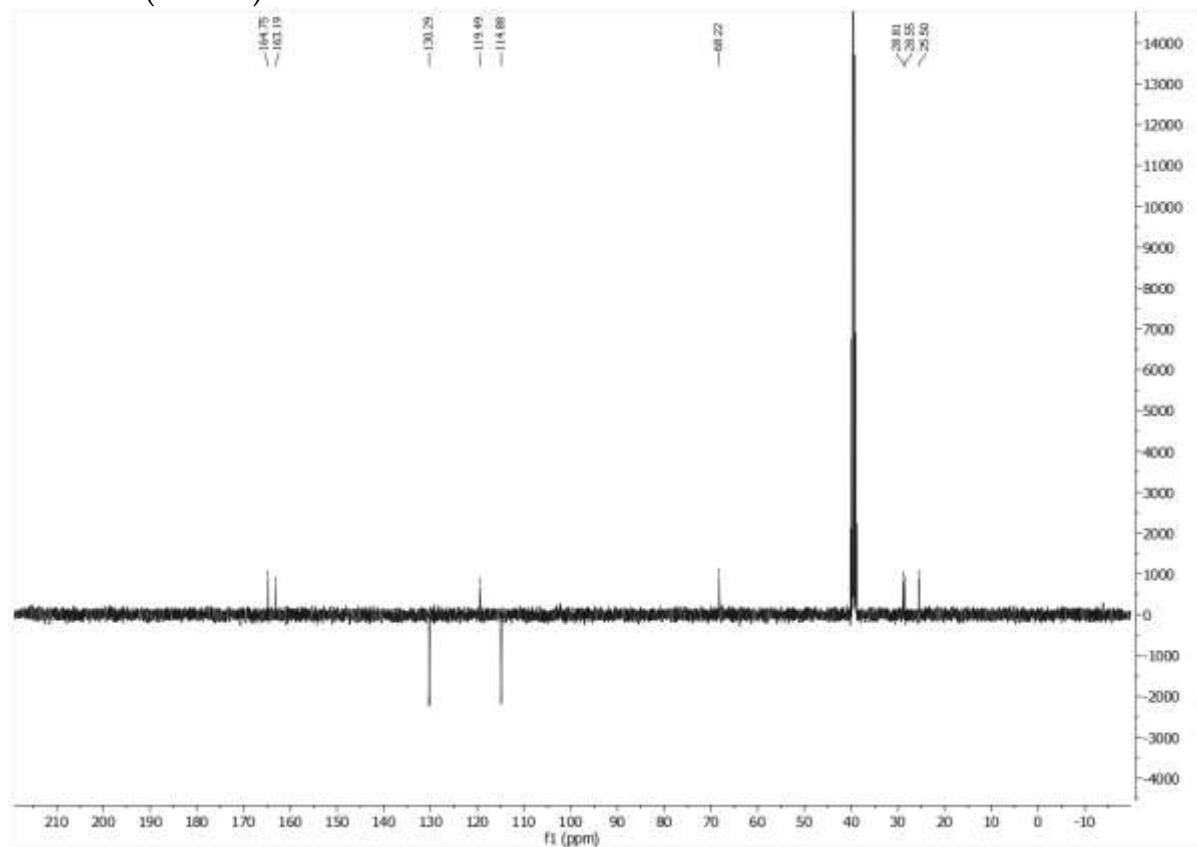

### Compound 12 <sup>1</sup>H NMR (DMSO)

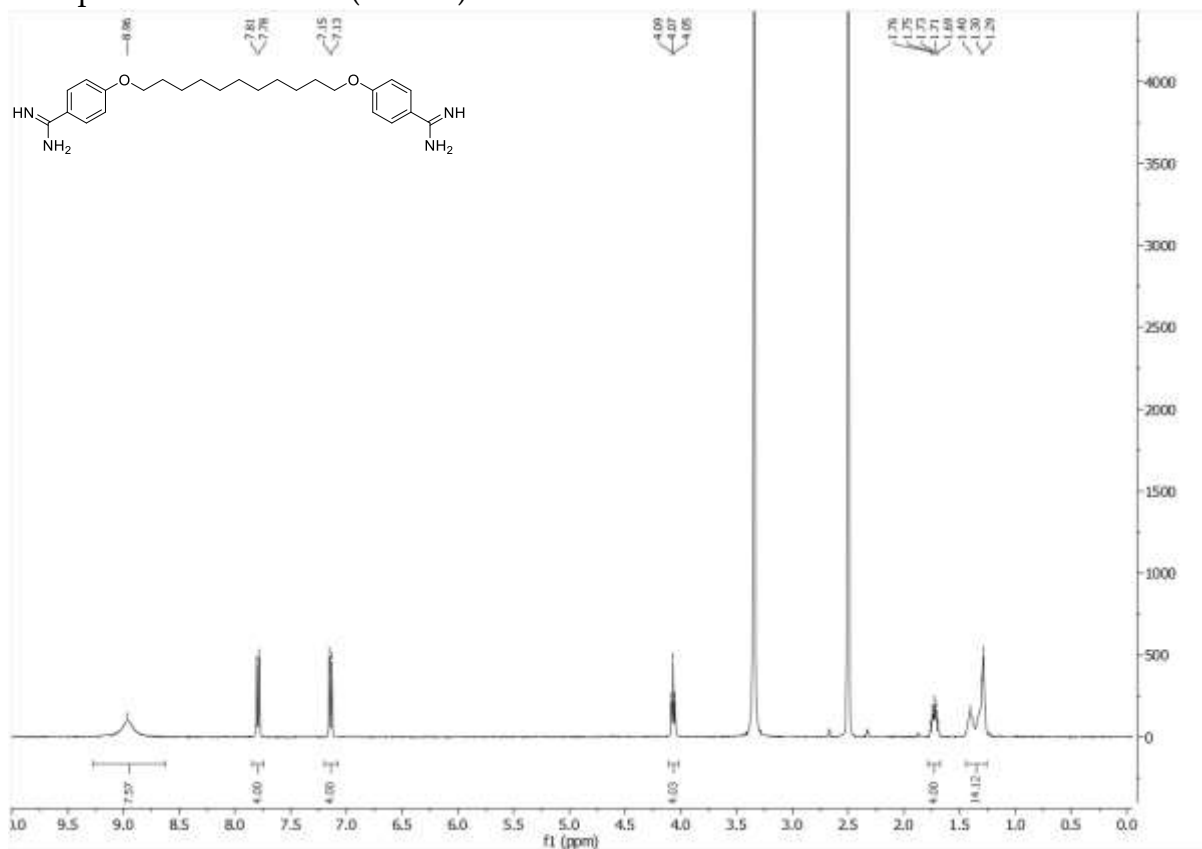

### <sup>13</sup>C NMR (DMSO)

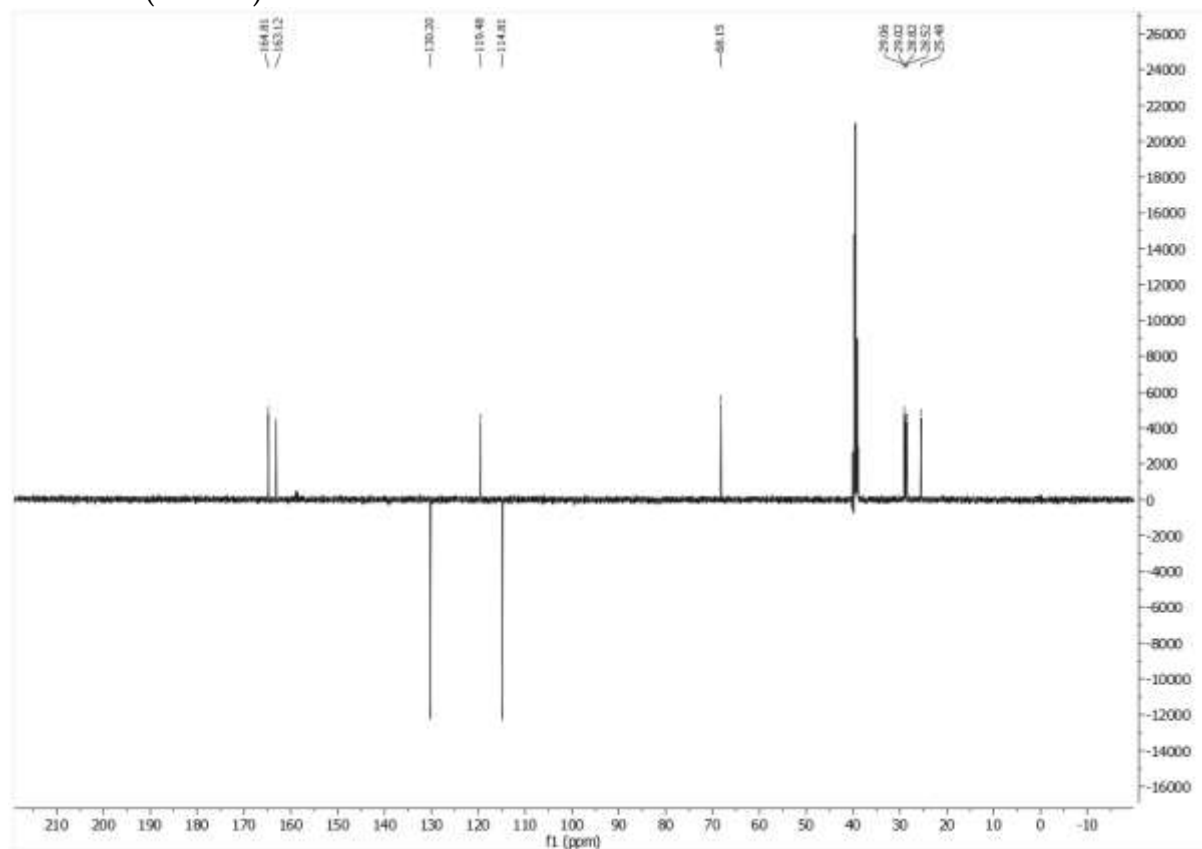

Compound **13**  $^1\text{H}$  NMR ( $\text{CDCl}_3$ )

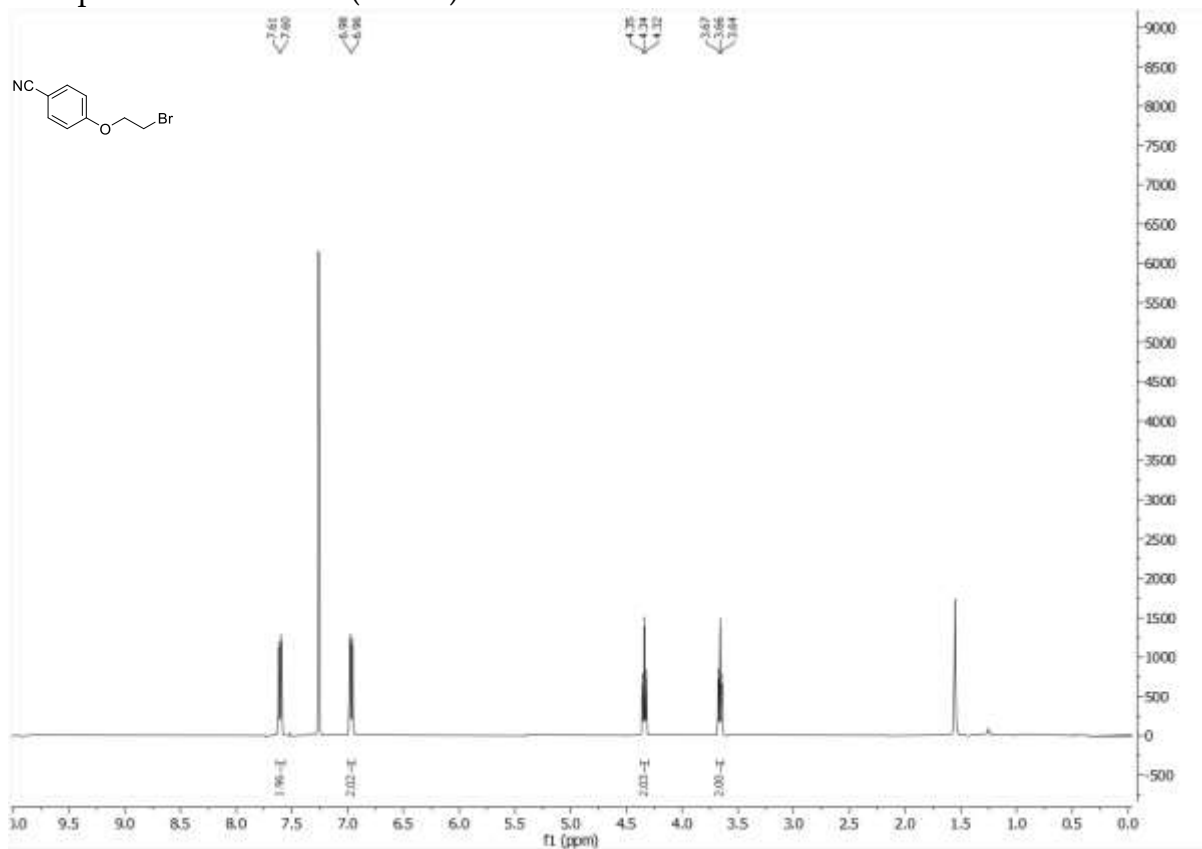

$^{13}\text{C}$  NMR ( $\text{CDCl}_3$ )

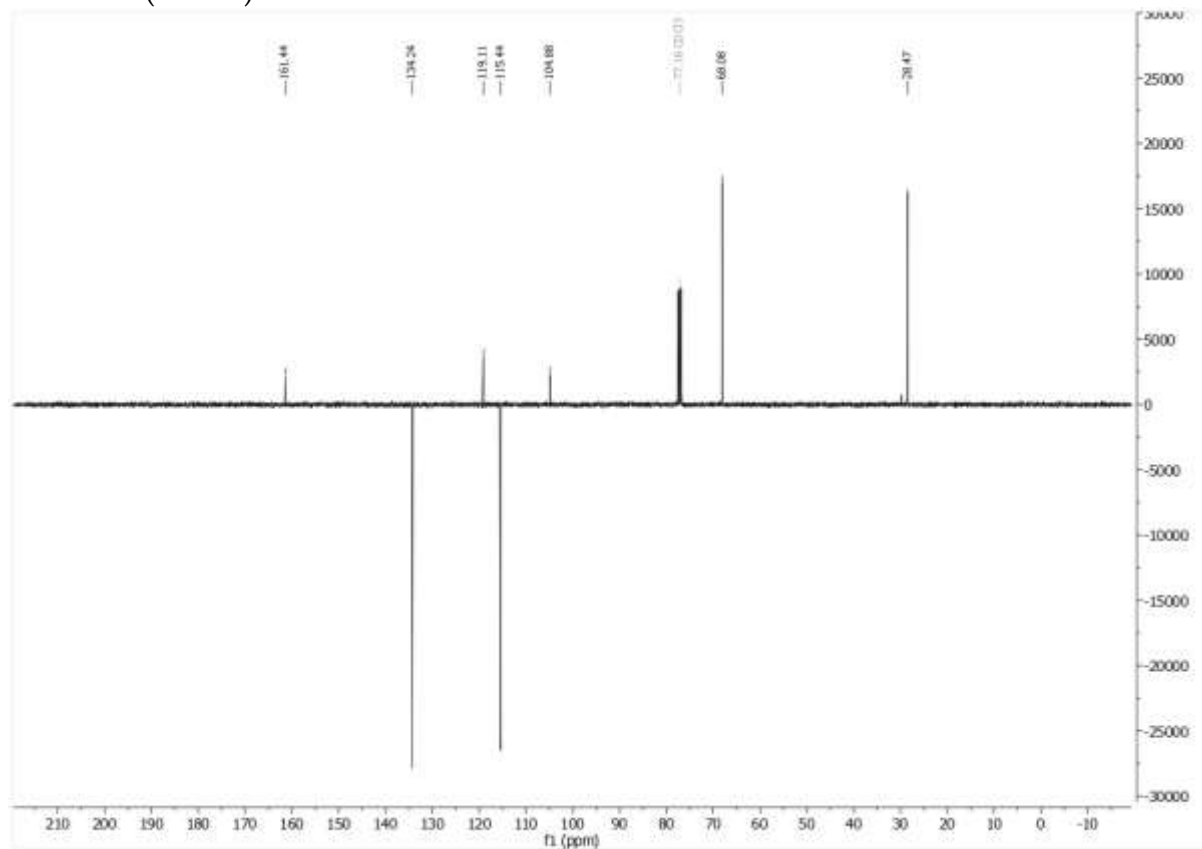

Compound **14**  $^1\text{H}$  NMR ( $\text{CDCl}_3$ )

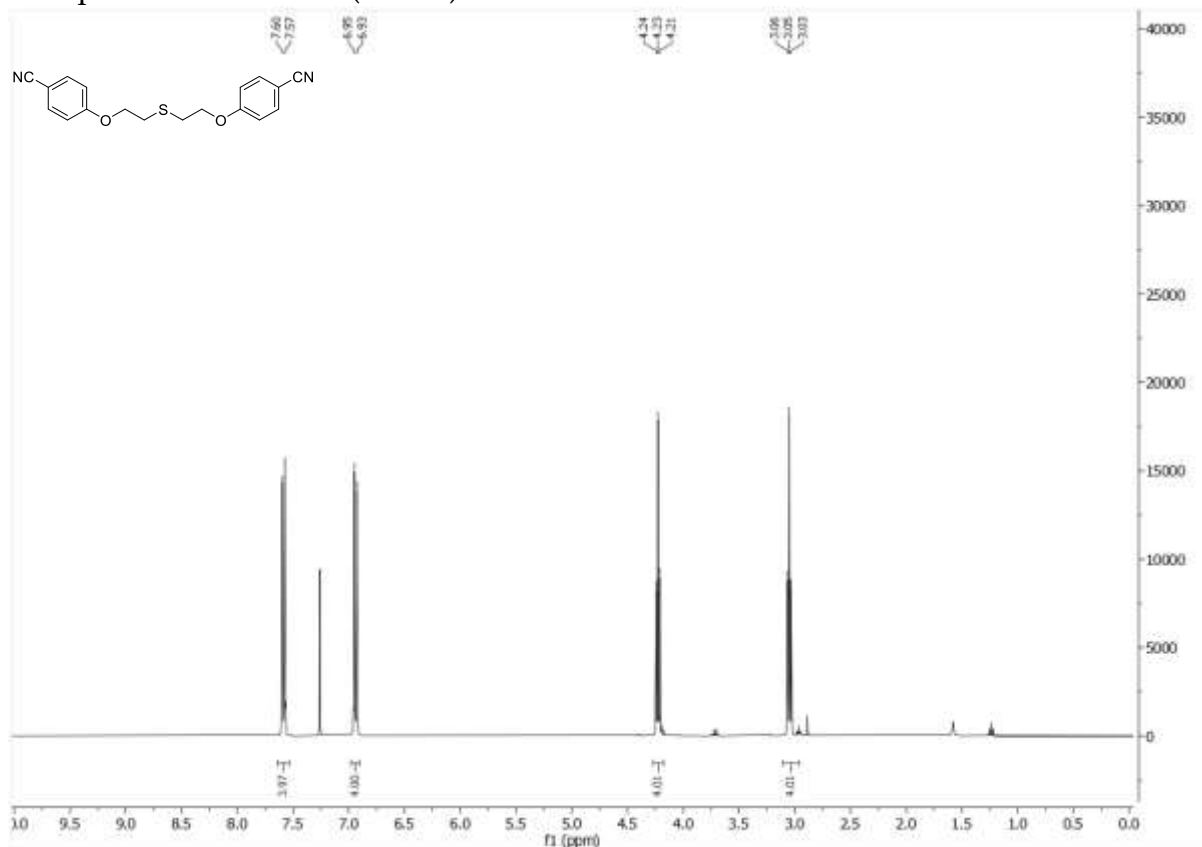

$^{13}\text{C}$  NMR ( $\text{CDCl}_3$ )

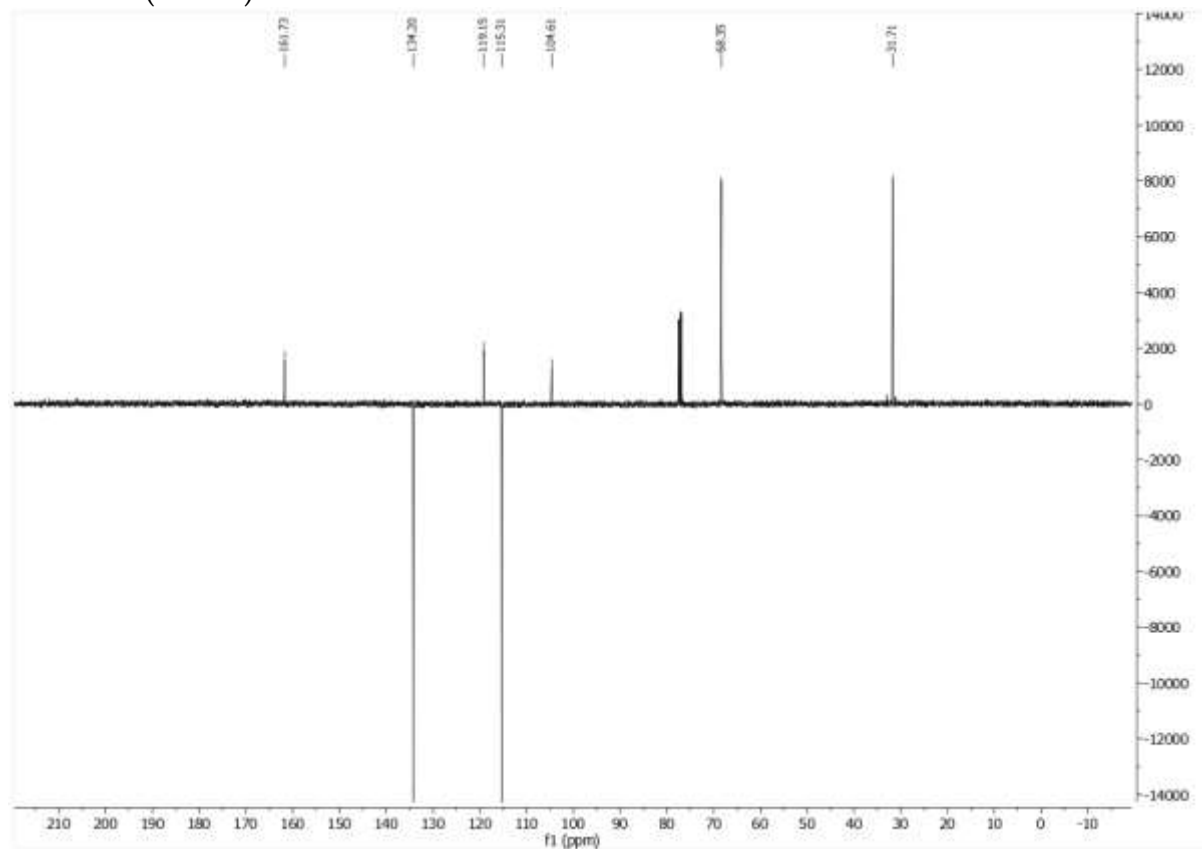



### Compound **15** $^1\text{H}$ NMR (DMSO)

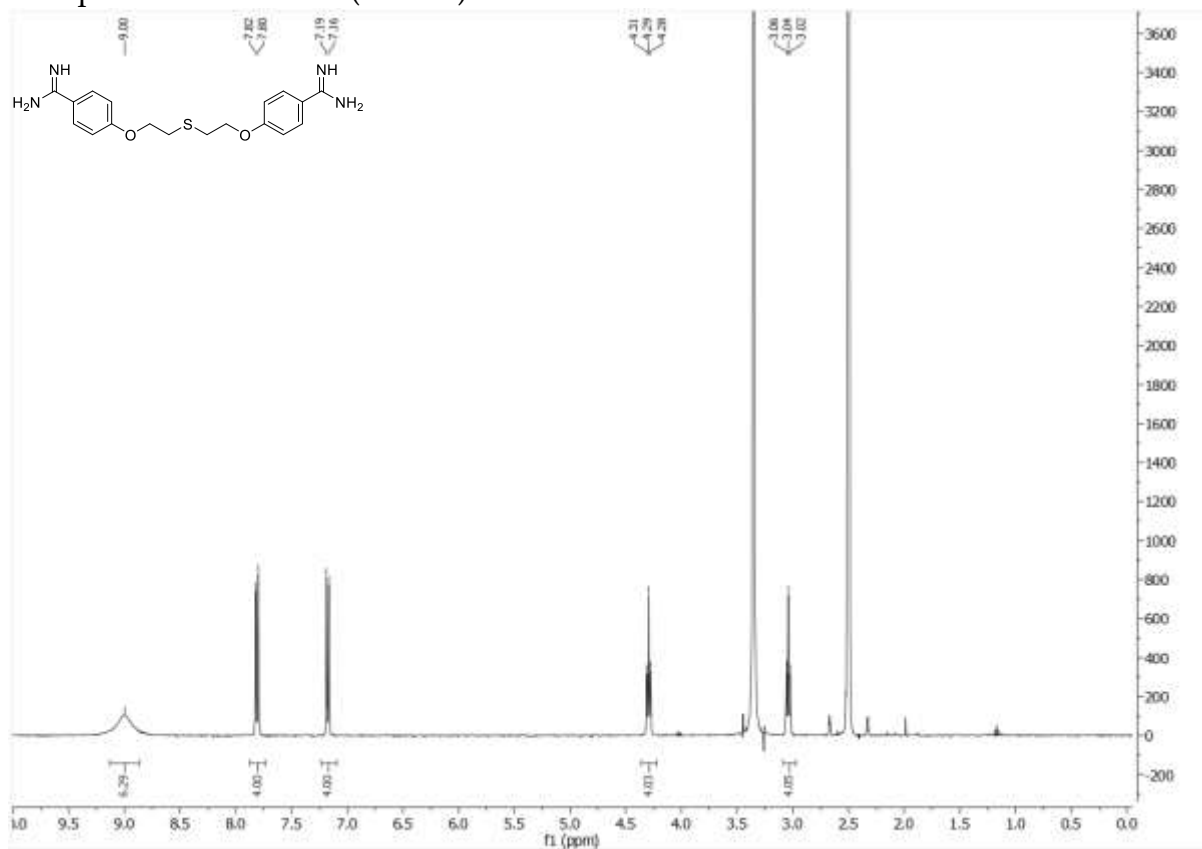

### $^{13}\text{C}$ NMR (DMSO)

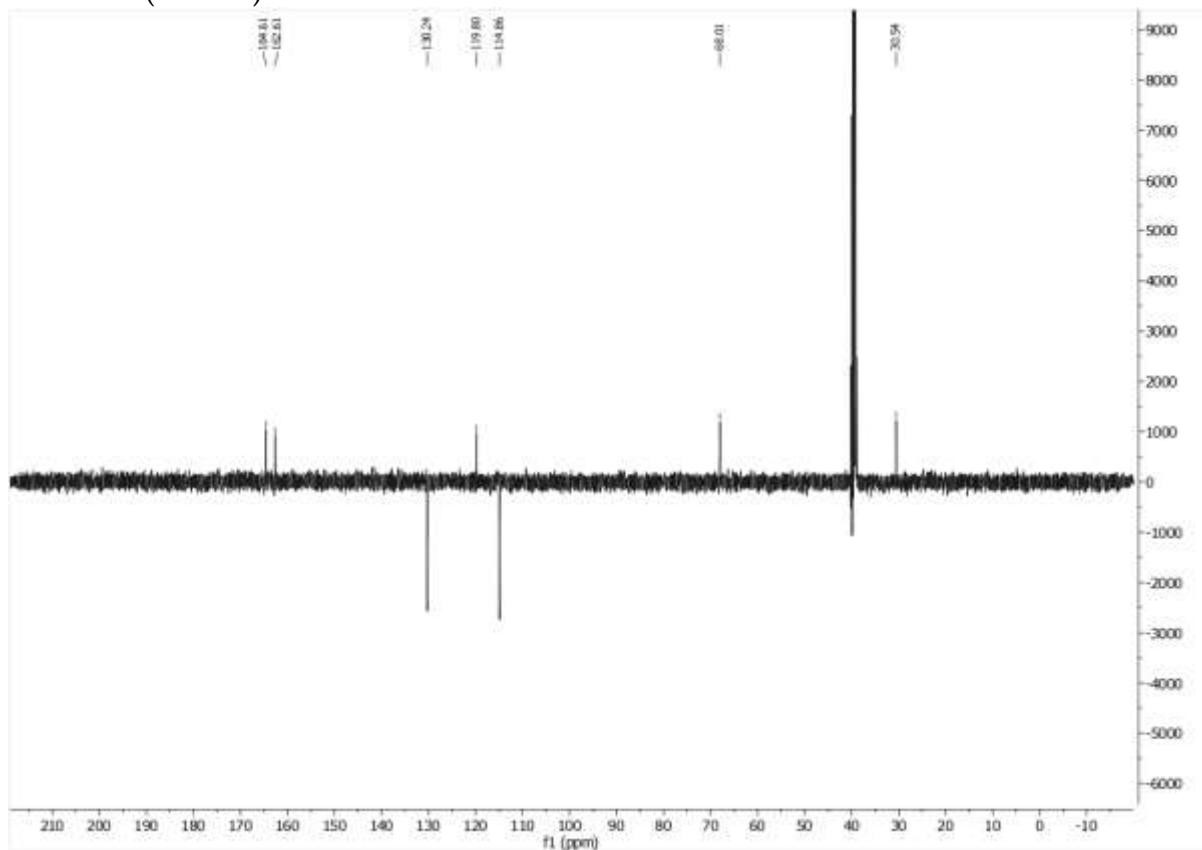

### Compound 16 <sup>1</sup>H NMR (DMSO)

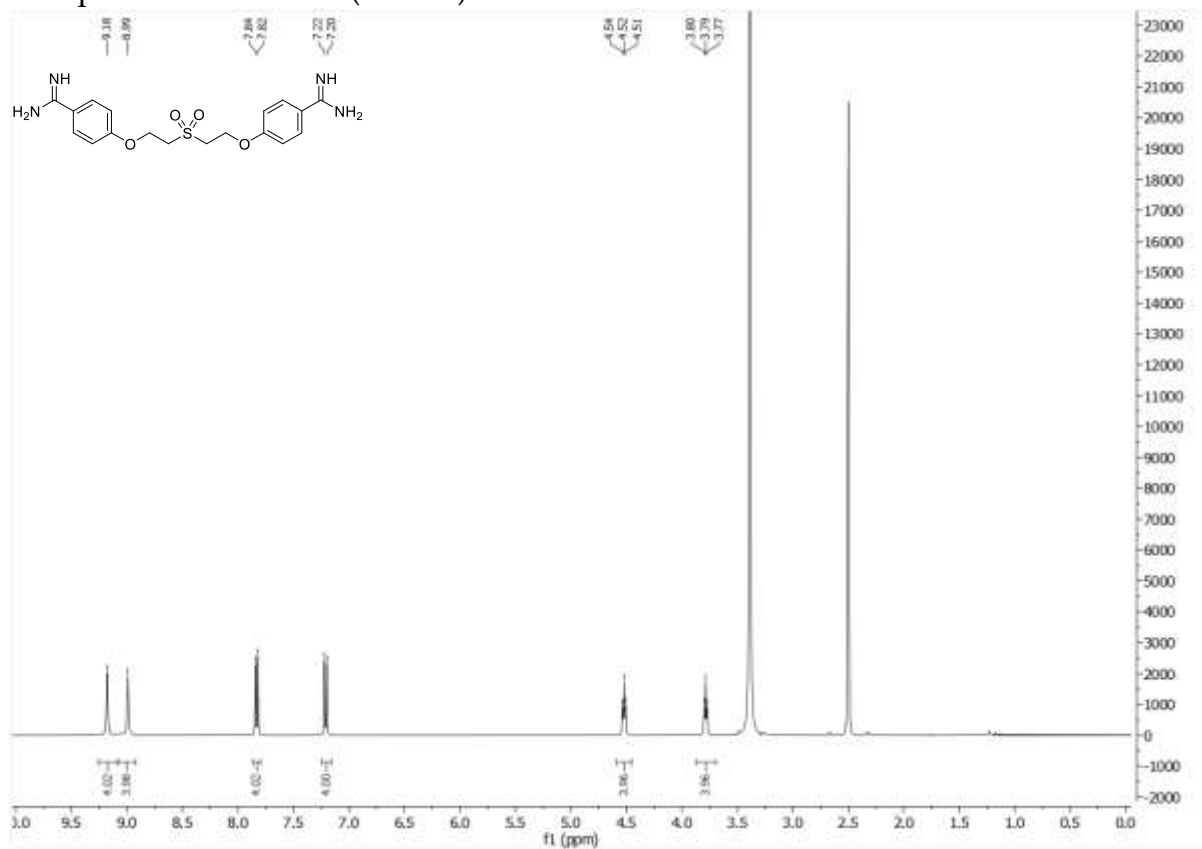

### <sup>13</sup>C NMR (DMSO)

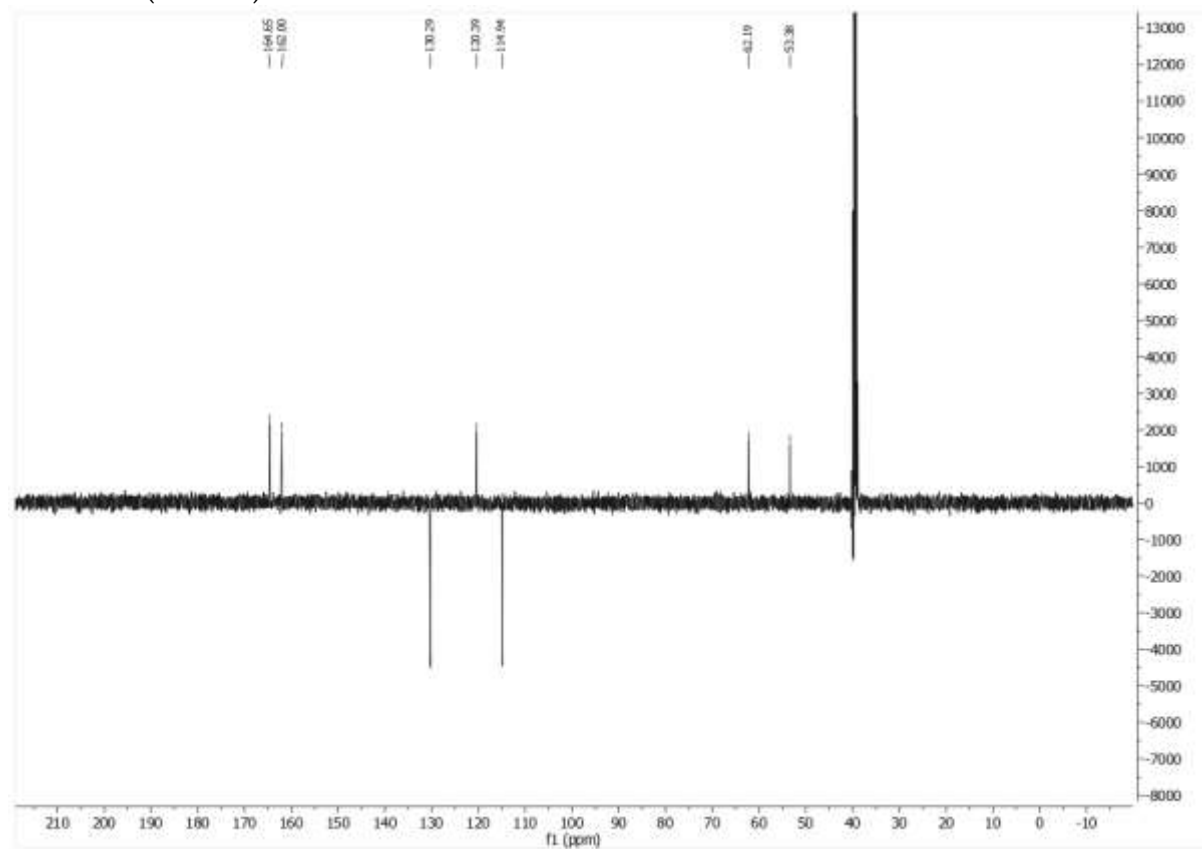

Compound **17**  $^1\text{H}$  NMR ( $\text{CDCl}_3$ )

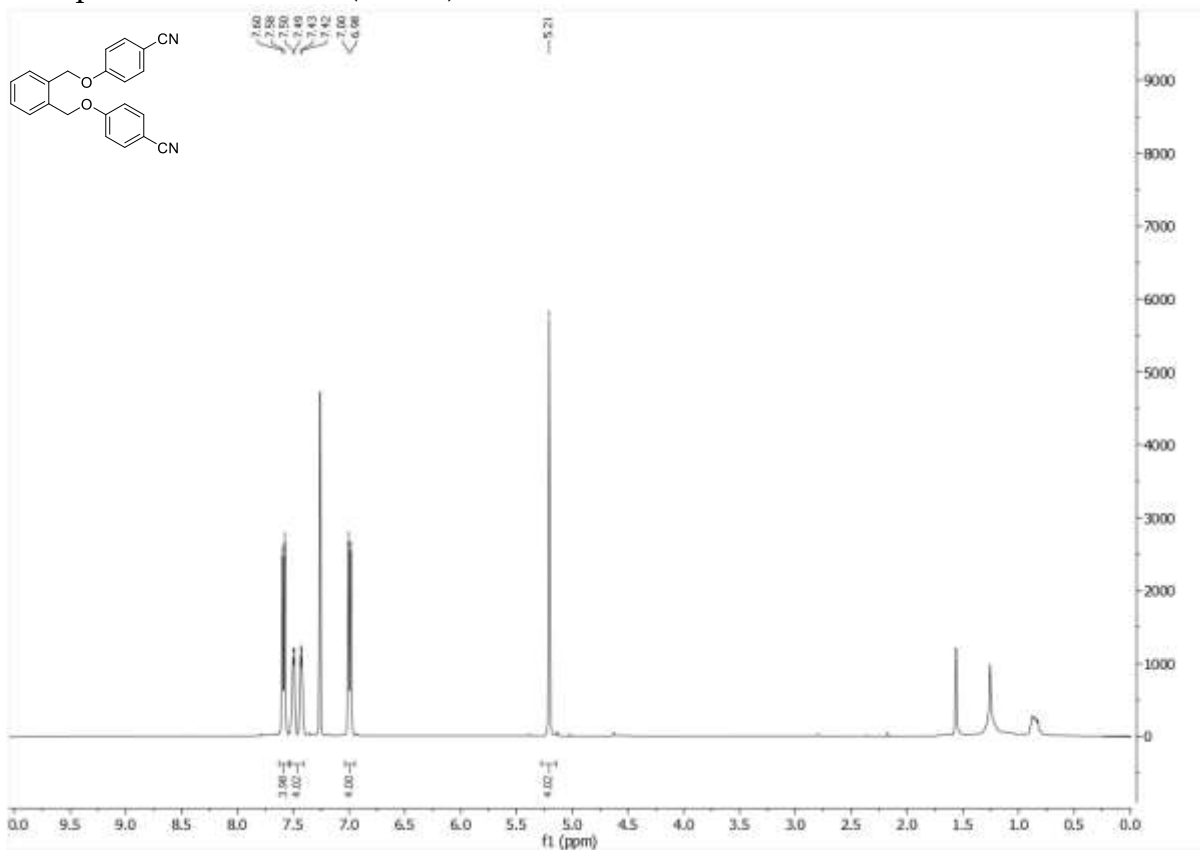

$^{13}\text{C}$  NMR ( $\text{CDCl}_3$ )

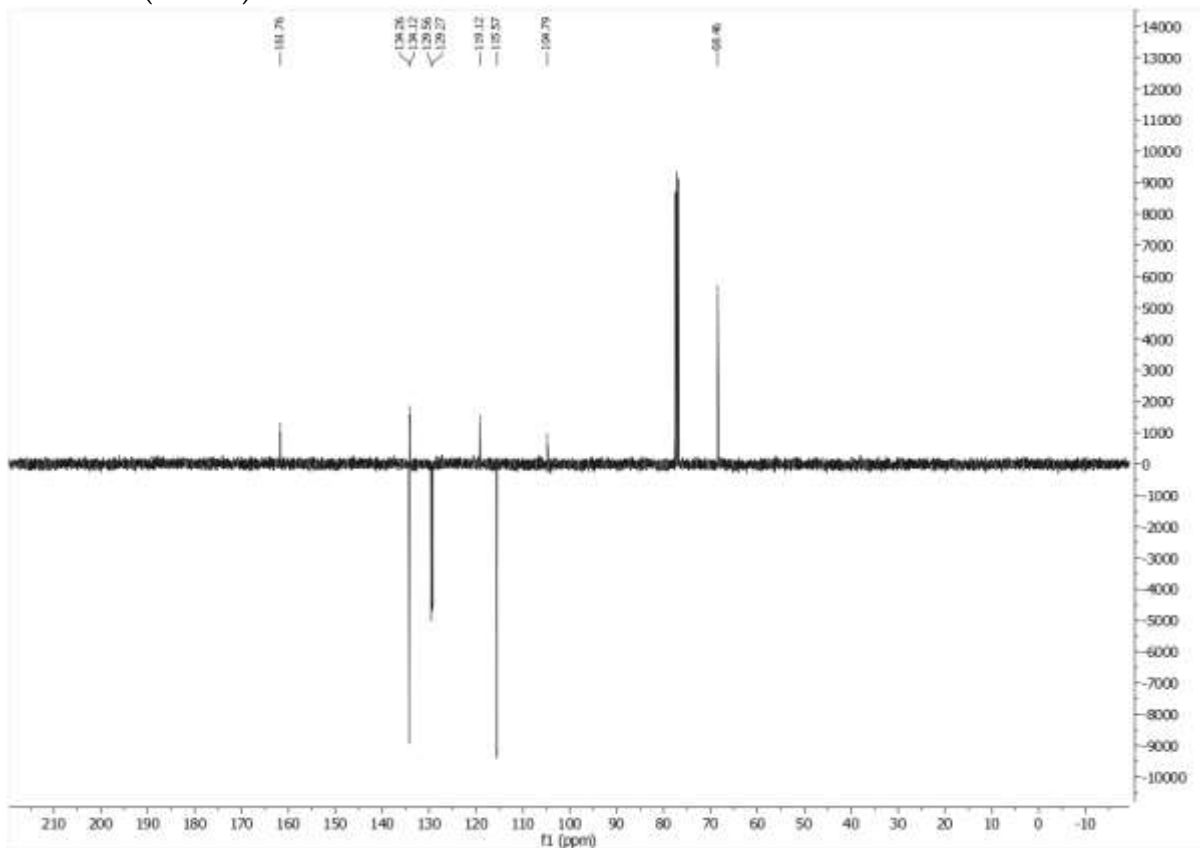

Compound **18**  $^1\text{H}$  NMR ( $\text{CDCl}_3$ )

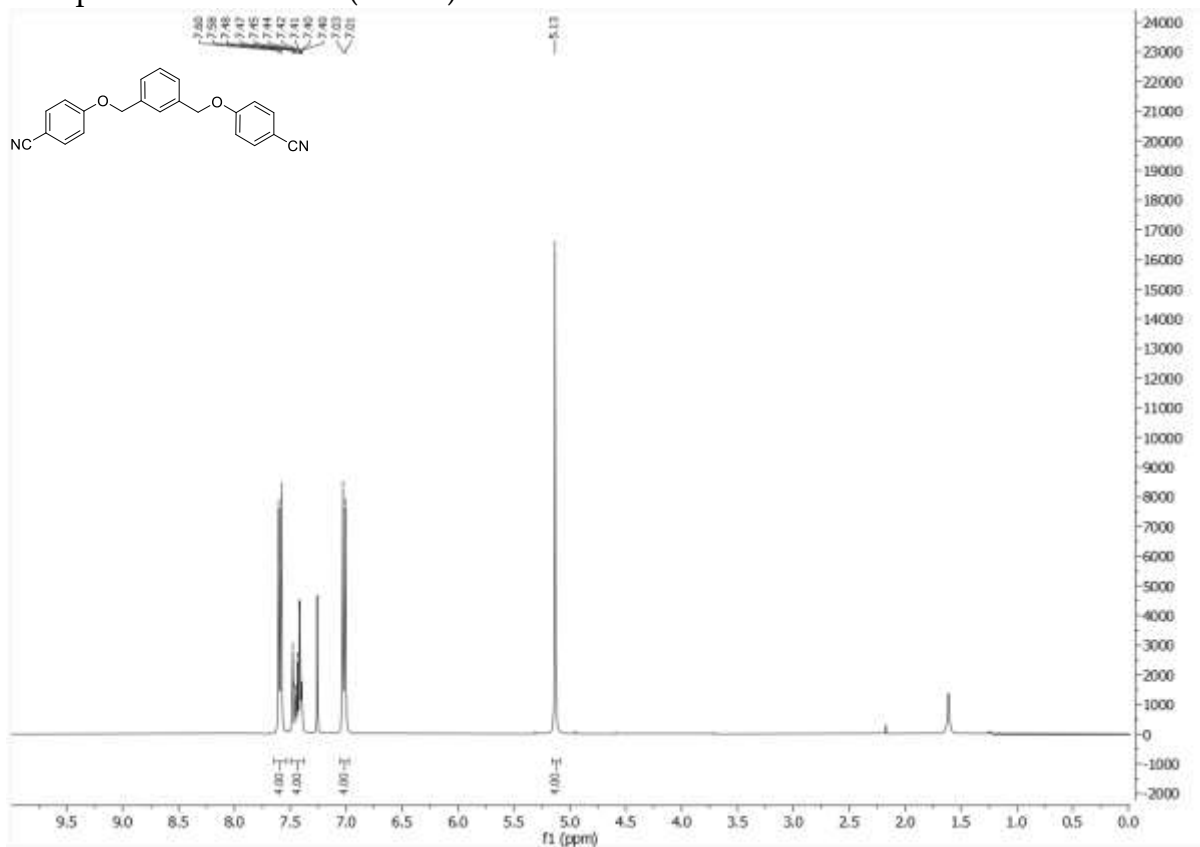

$^{13}\text{C}$  NMR ( $\text{CDCl}_3$ )

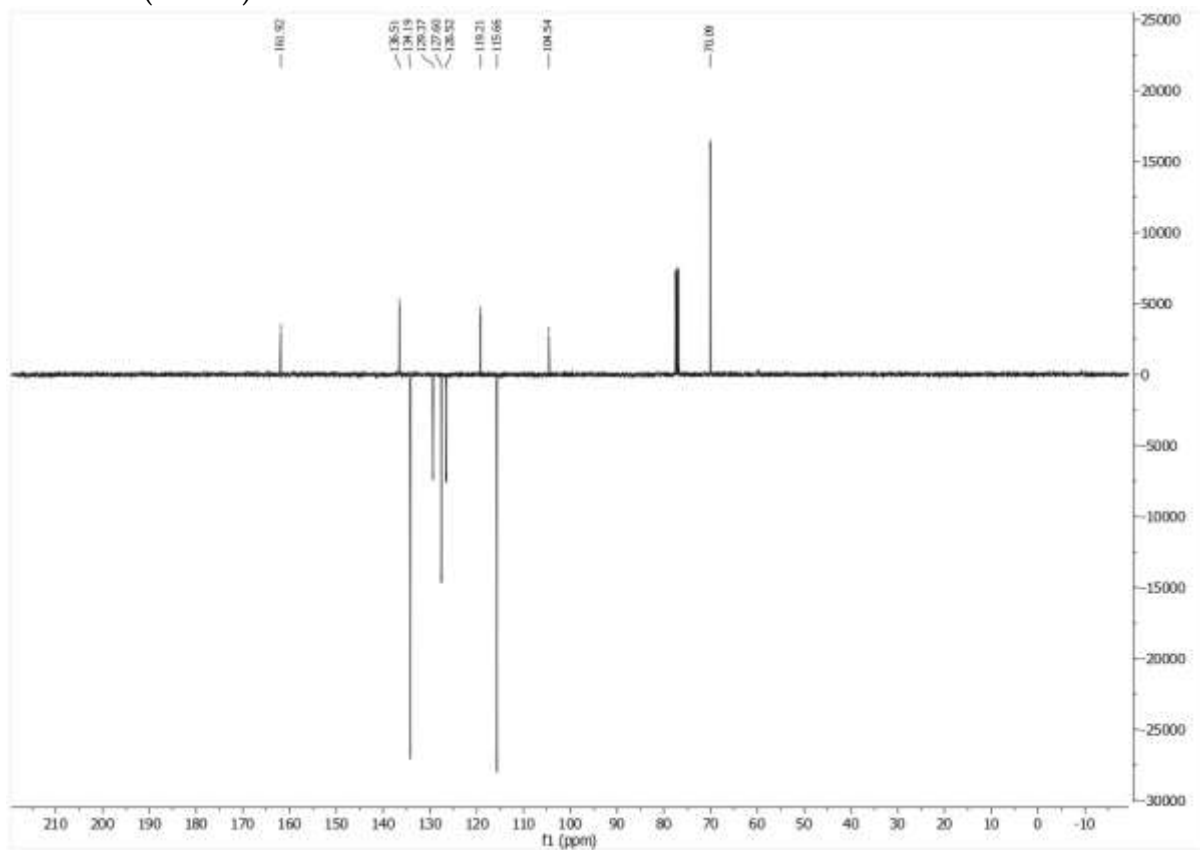

Compound **19**  $^1\text{H}$  NMR ( $\text{CDCl}_3$ )

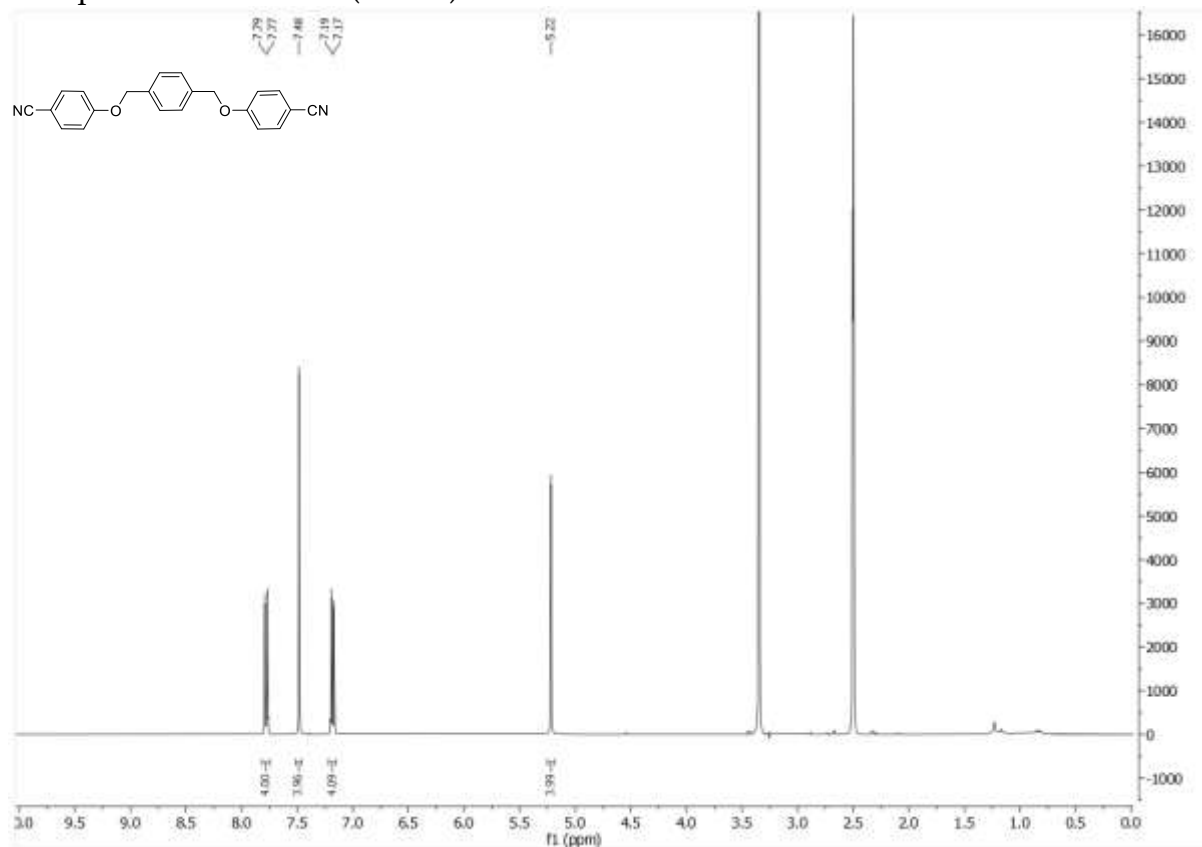

$^{13}\text{C}$  NMR ( $\text{CDCl}_3$ )

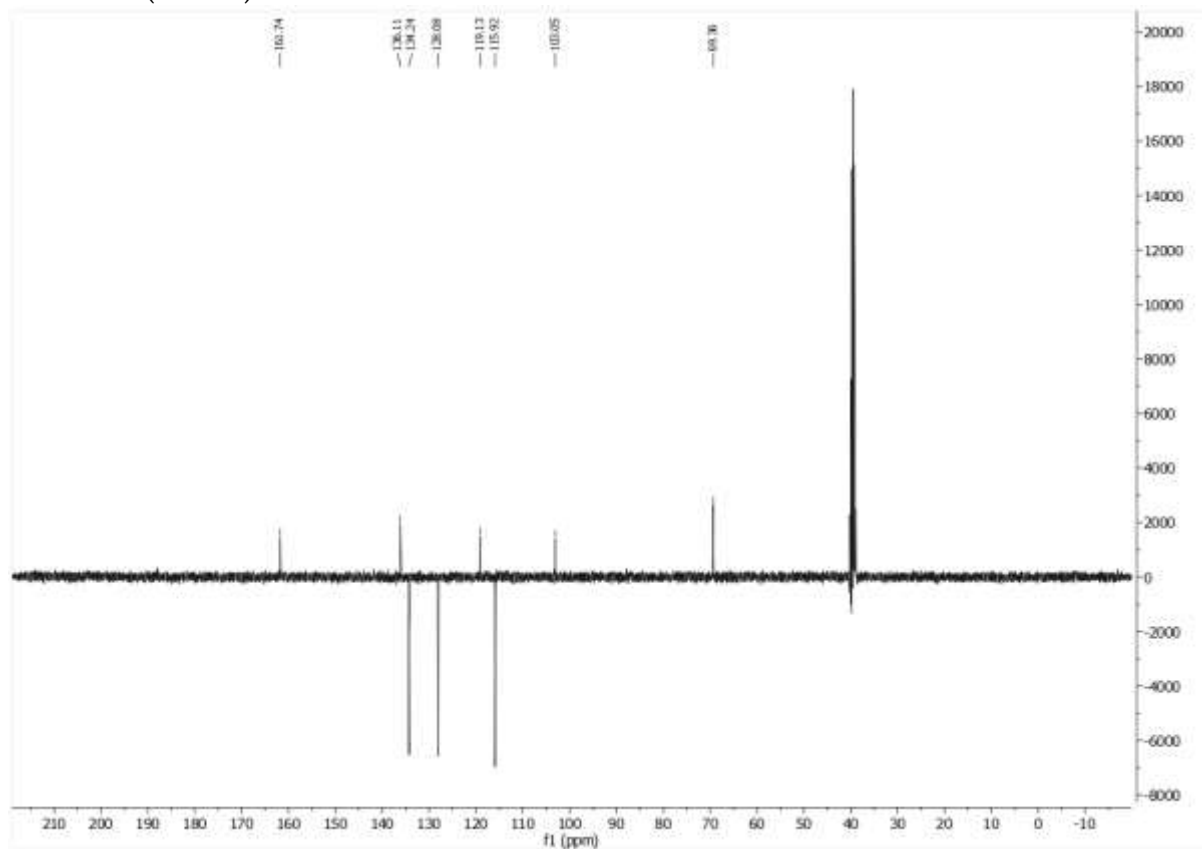

### Compound 20 <sup>1</sup>H NMR (CDCl<sub>3</sub>)

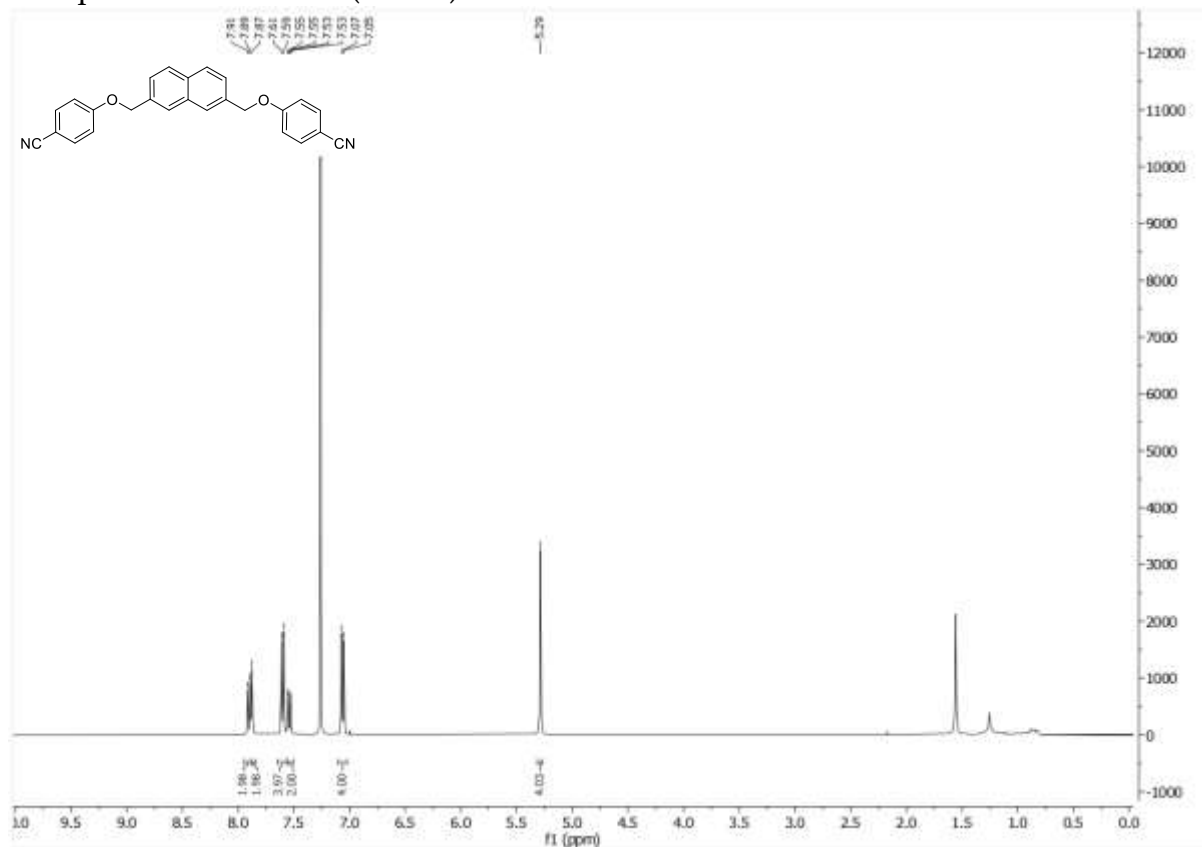

### <sup>13</sup>C NMR (CDCl<sub>3</sub>)

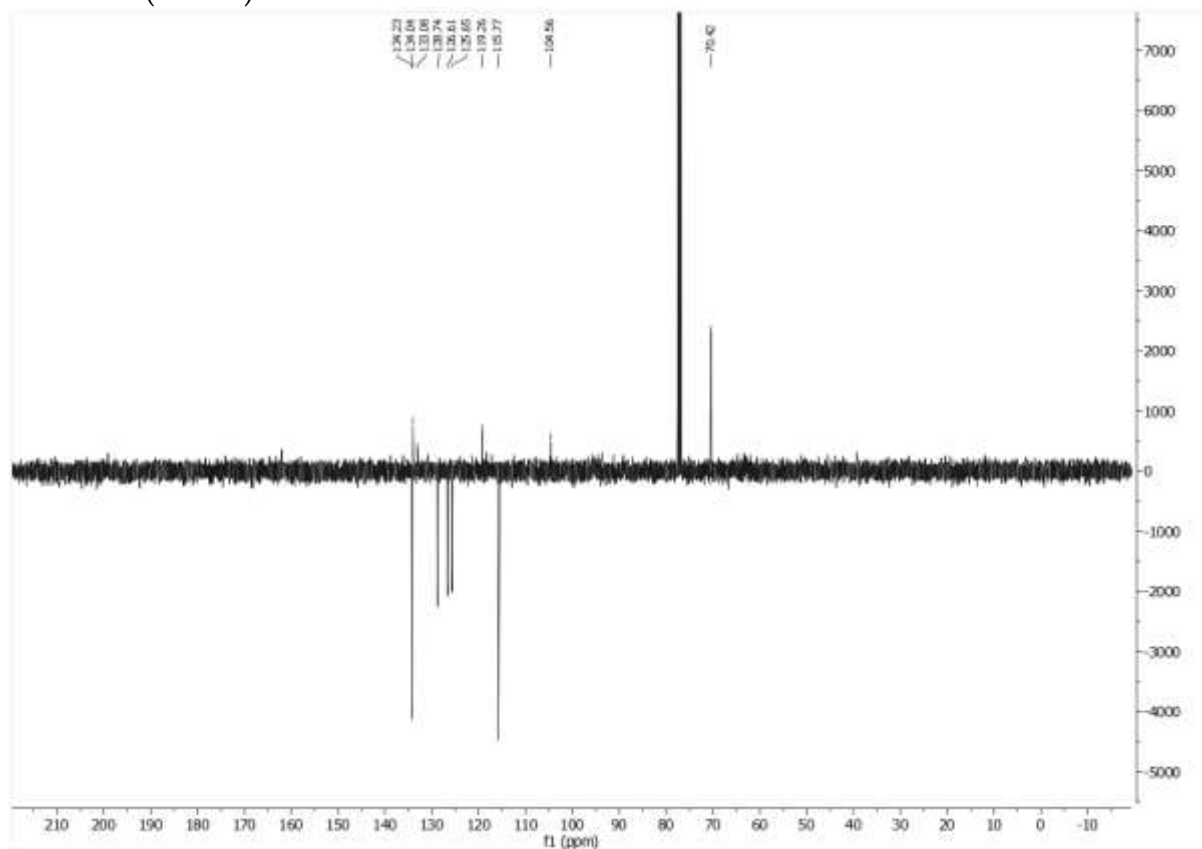

### Compound 21 <sup>1</sup>H NMR (DMSO)

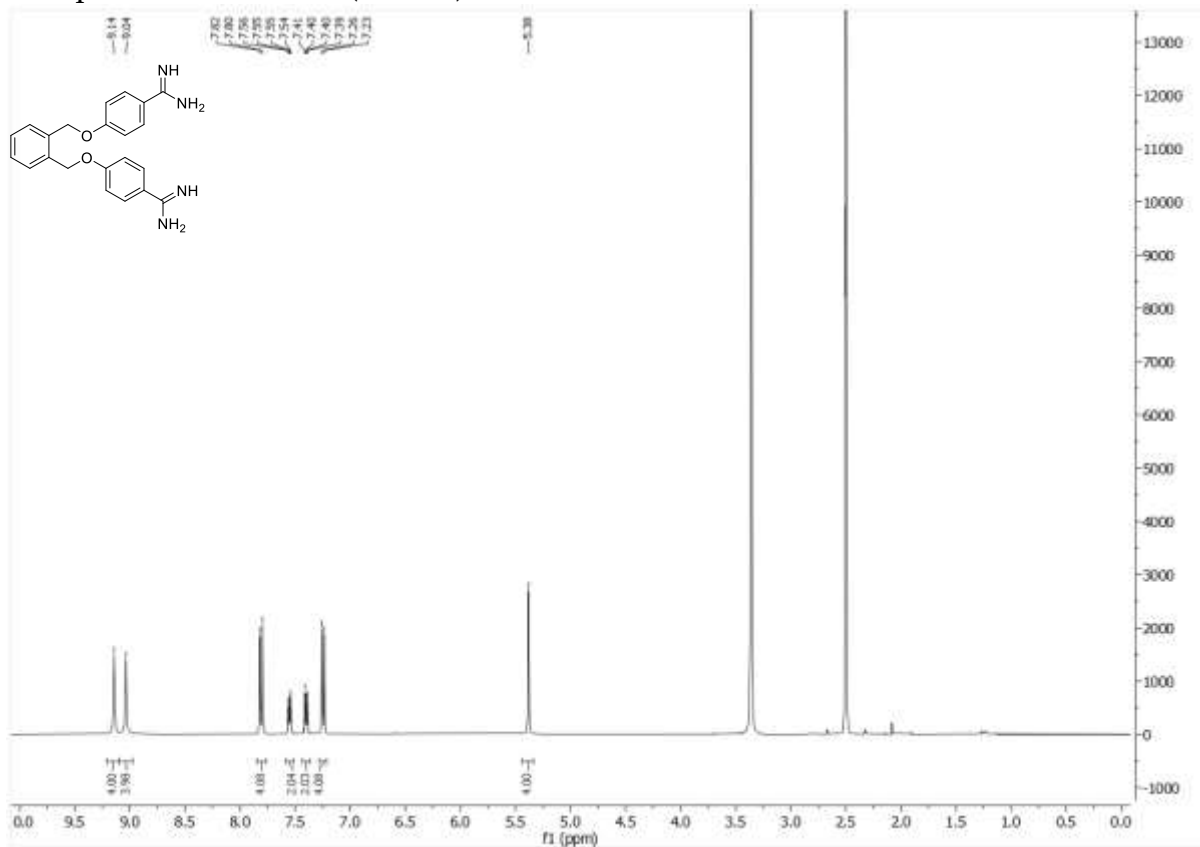

### <sup>13</sup>C NMR (DMSO)

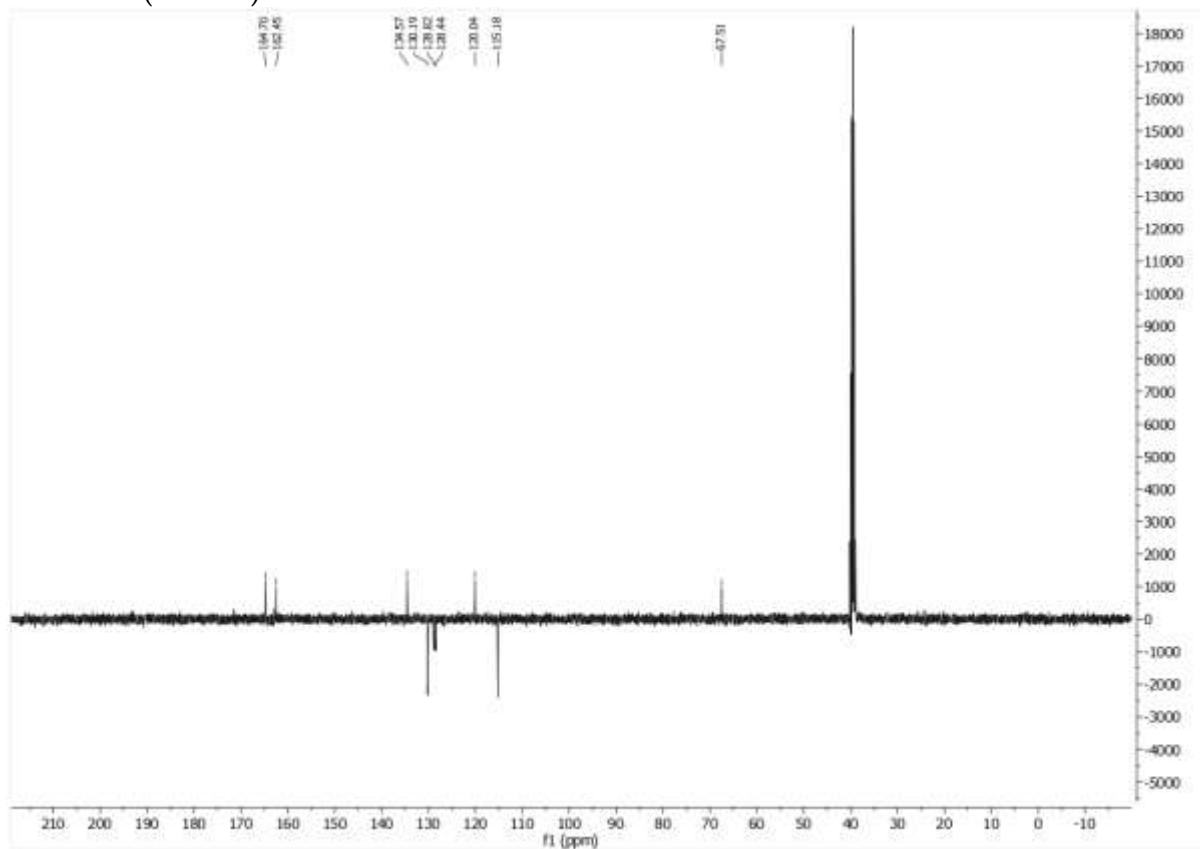

### Compound 22 <sup>1</sup>H NMR (DMSO)

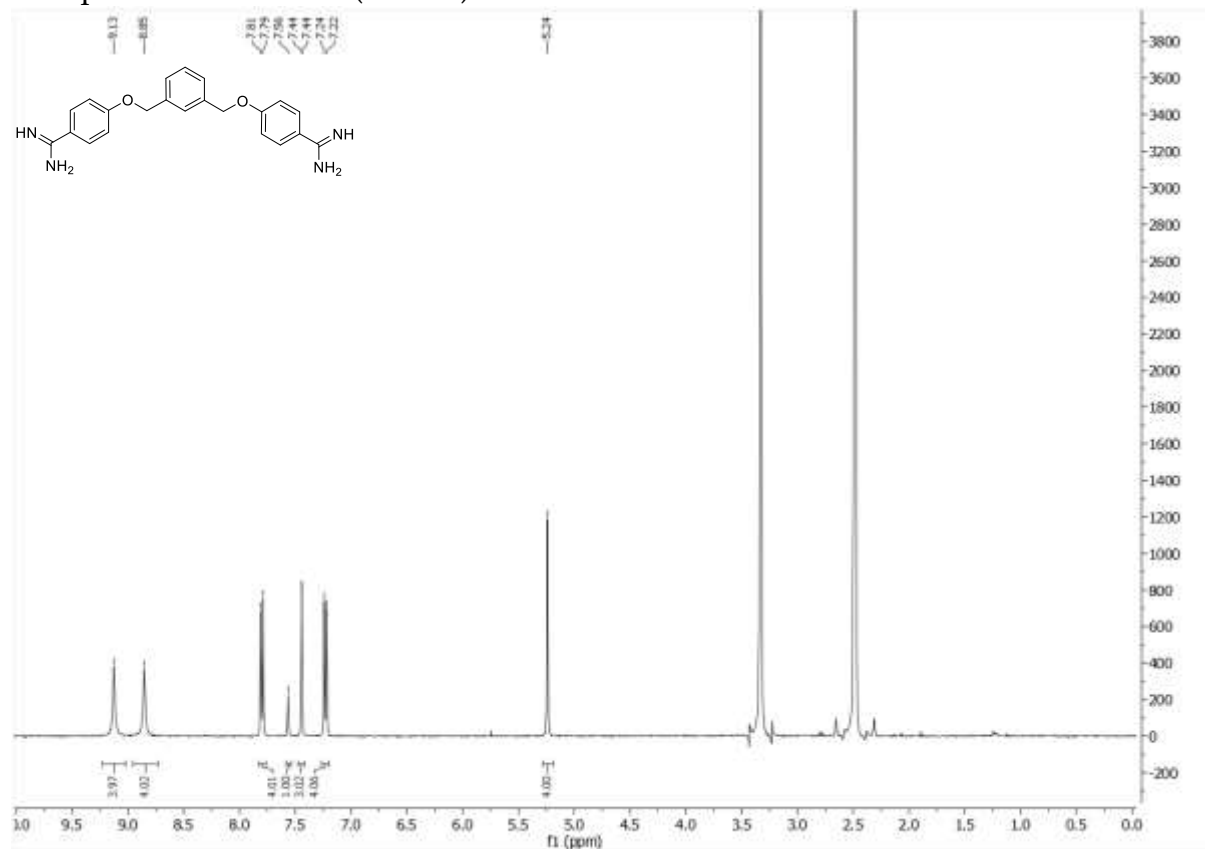

### <sup>13</sup>C NMR (DMSO)

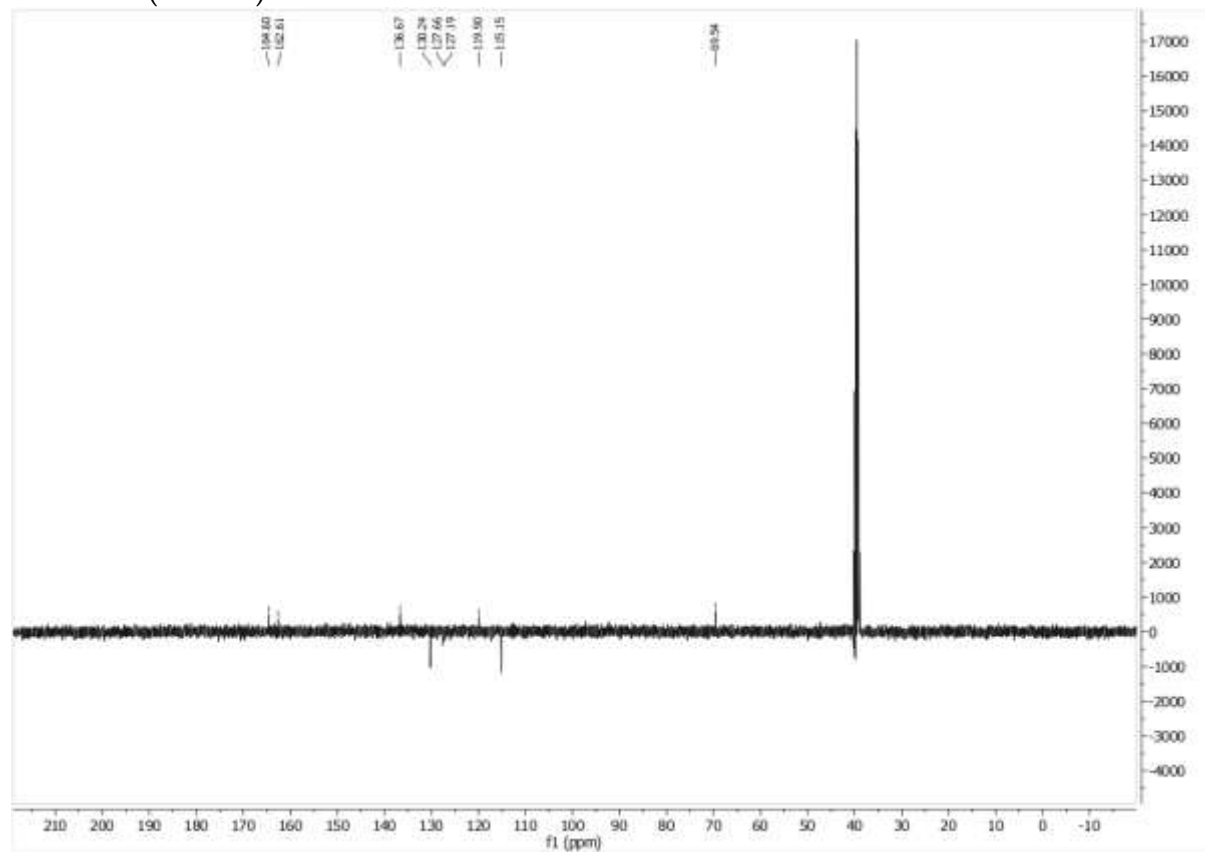



### Compound 23 <sup>1</sup>H NMR (DMSO)

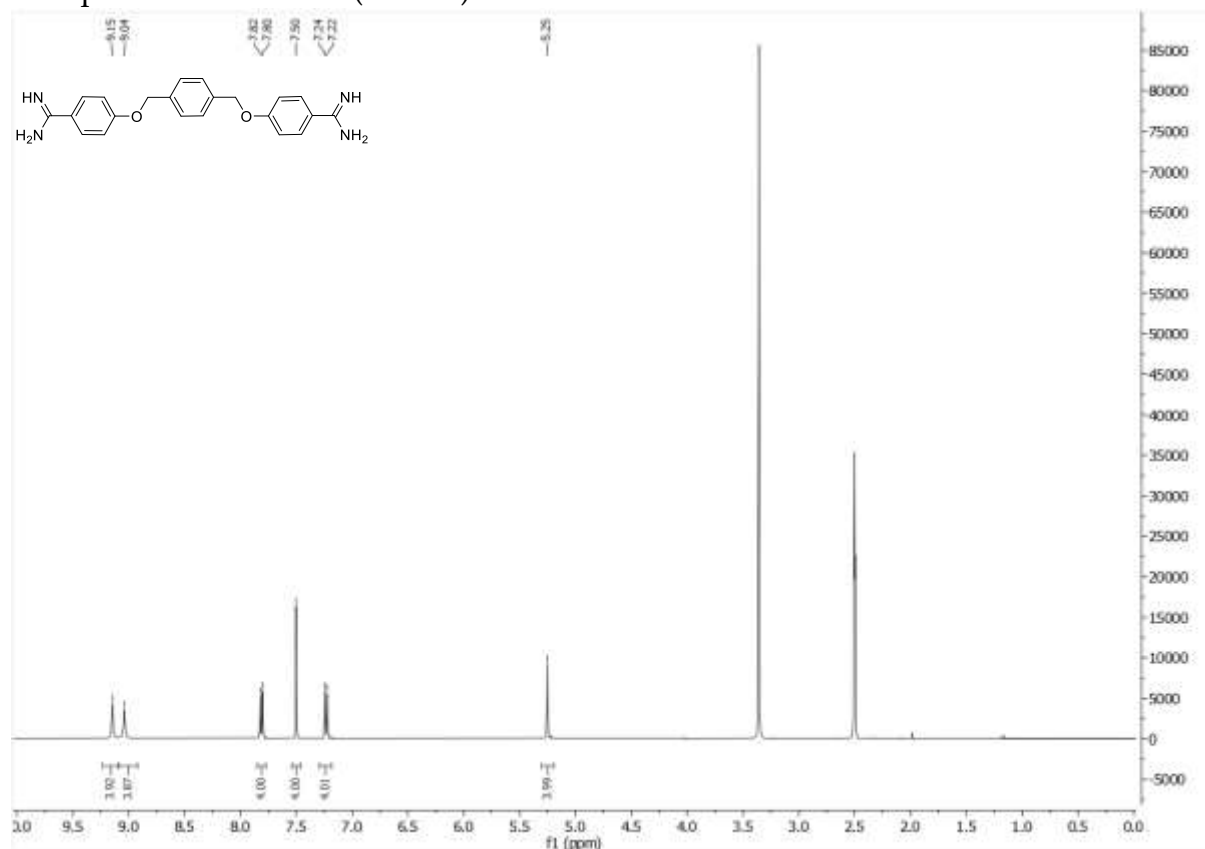

### <sup>13</sup>C NMR (DMSO)

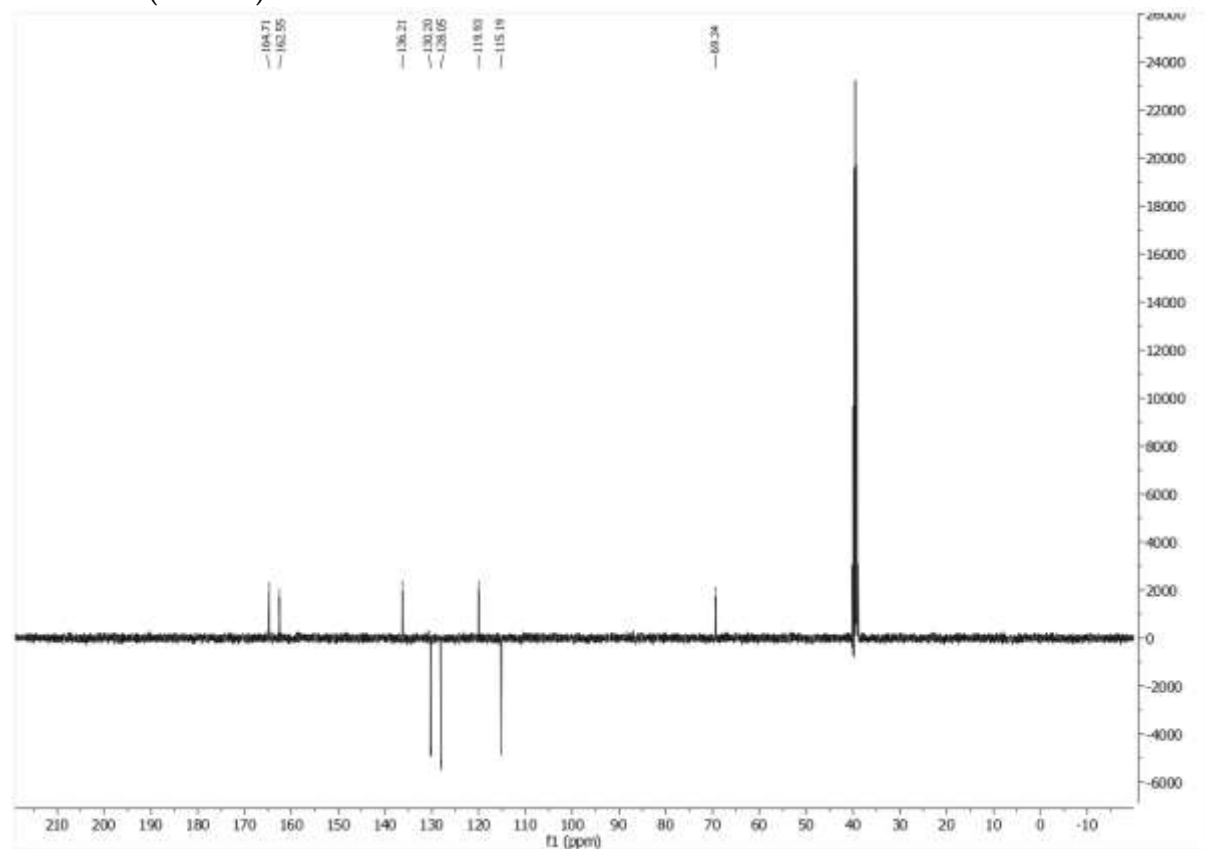

### Compound 24 <sup>1</sup>H NMR (DMSO)

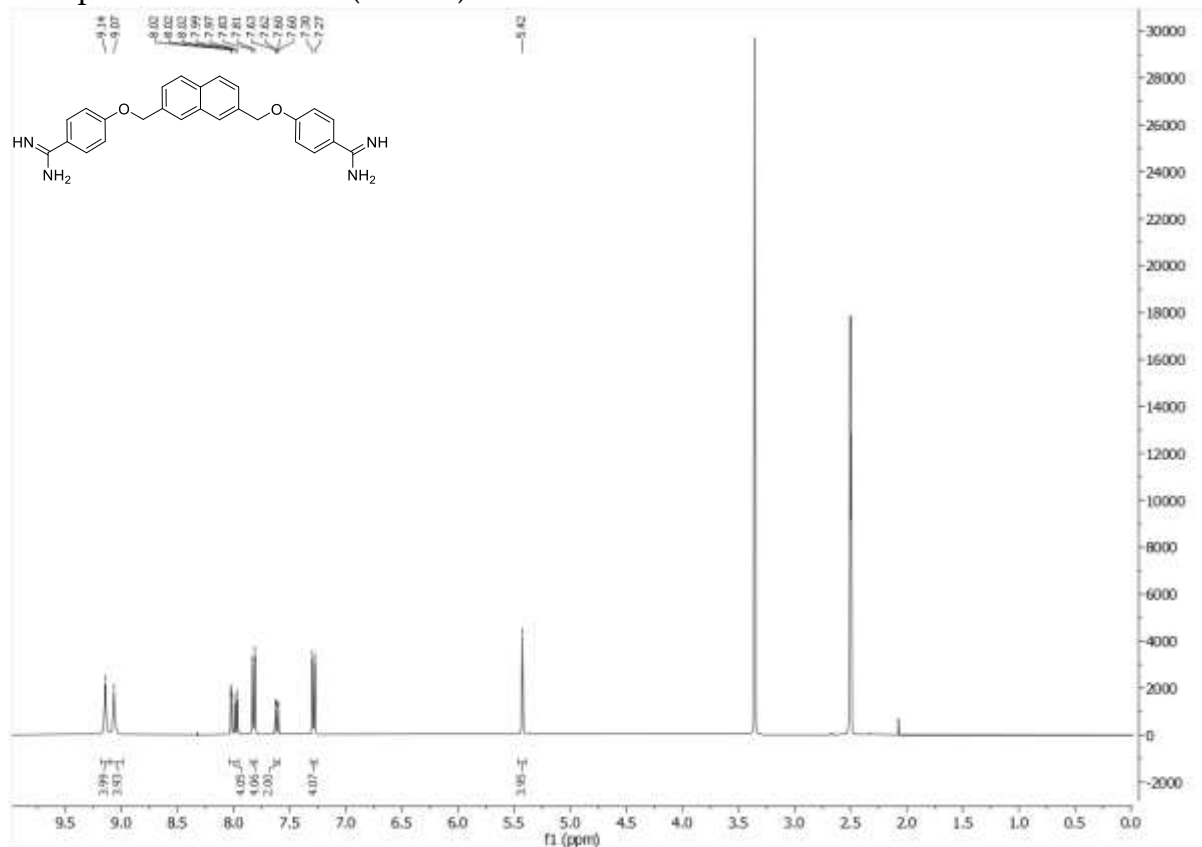

### <sup>13</sup>C NMR (DMSO)

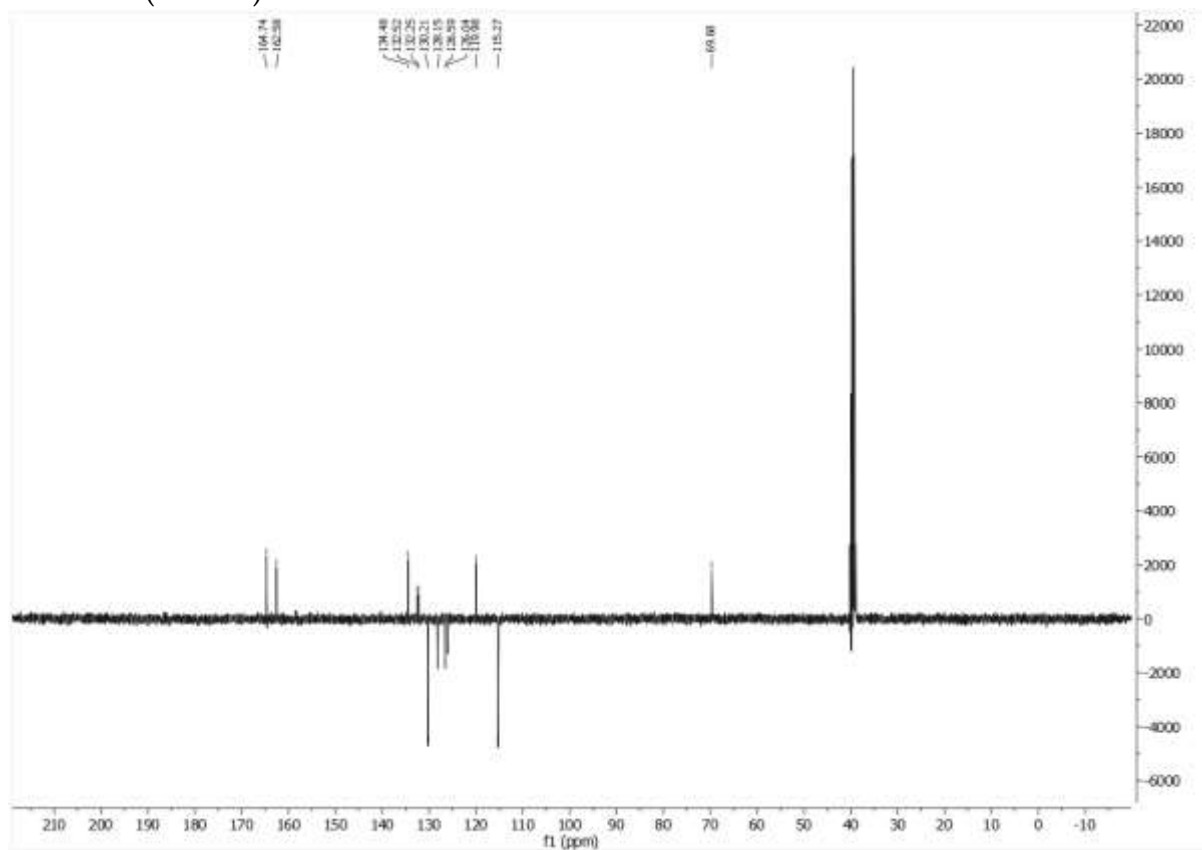

Compound 25 <sup>1</sup>H NMR (CDCl<sub>3</sub>)

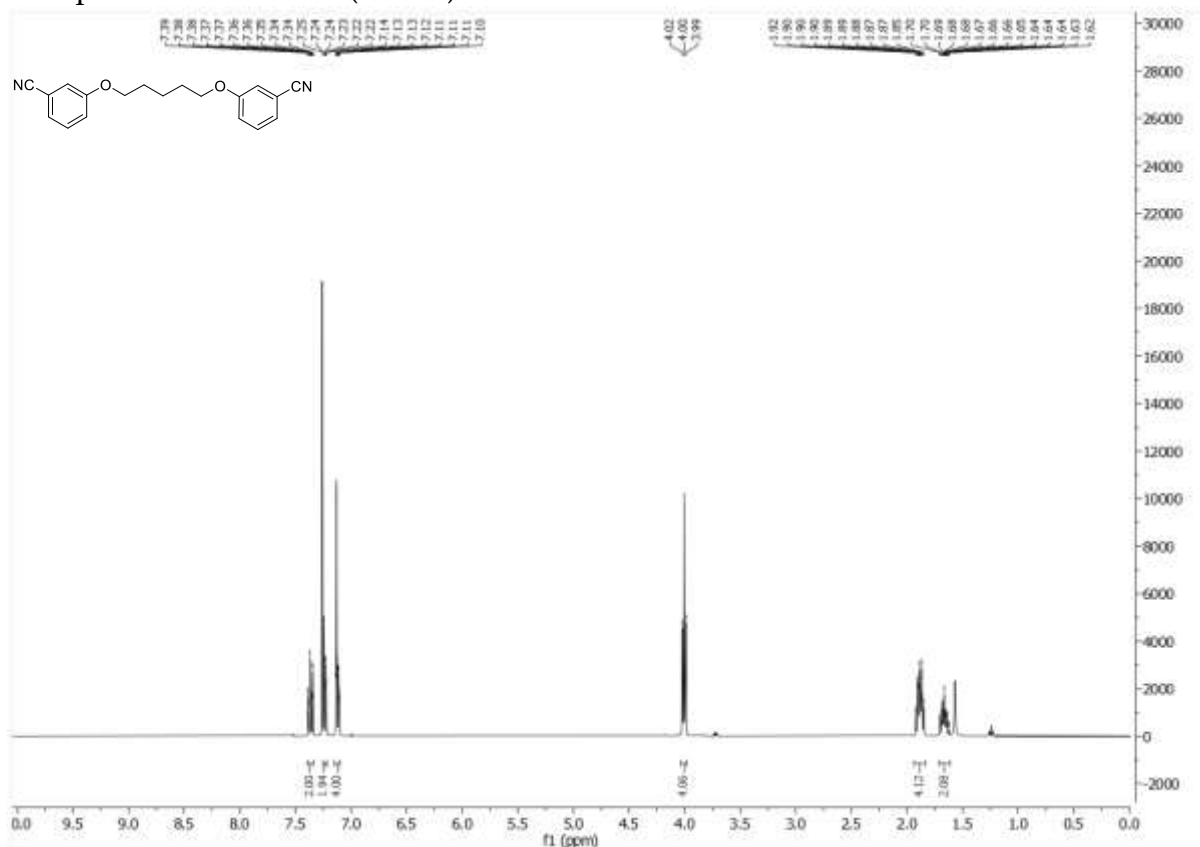

<sup>13</sup>C NMR (CDCl<sub>3</sub>)

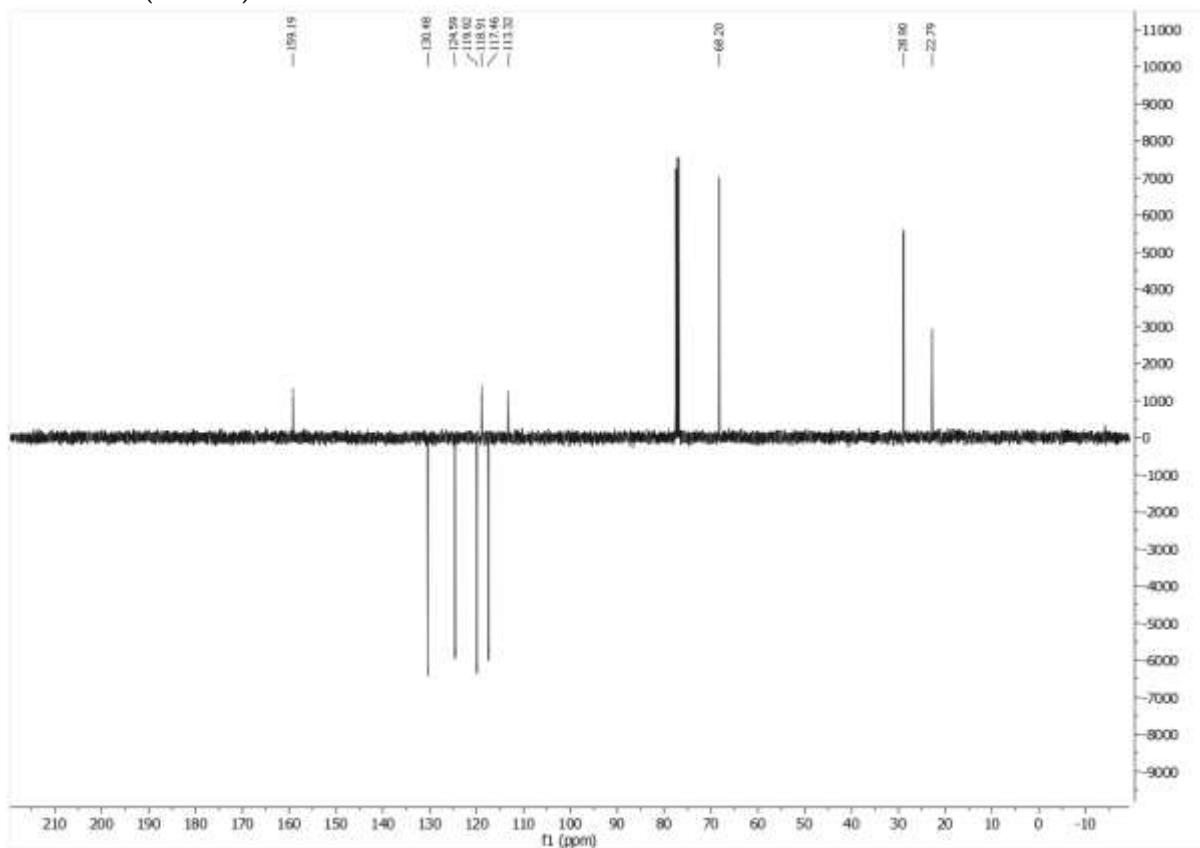

Compound **26**  $^1\text{H}$  NMR ( $\text{CDCl}_3$ )

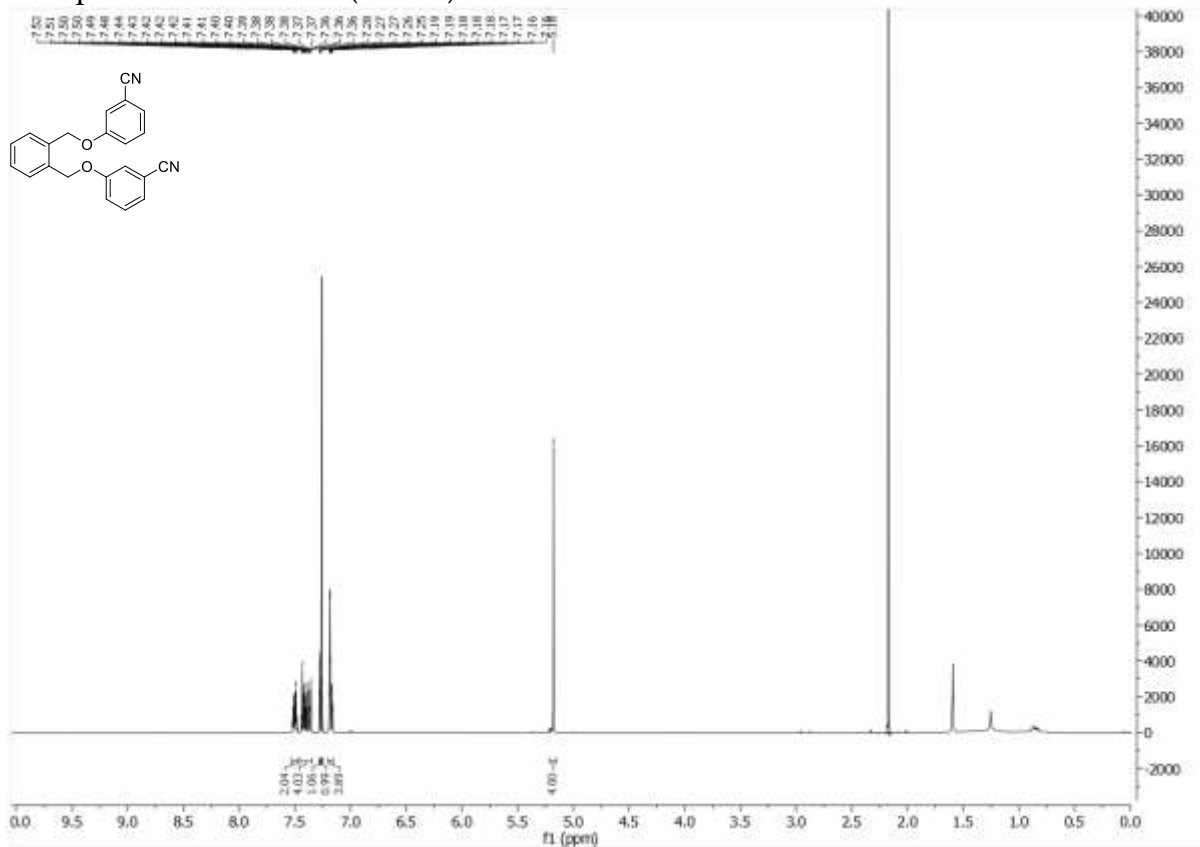

$^{13}\text{C}$  NMR ( $\text{CDCl}_3$ )

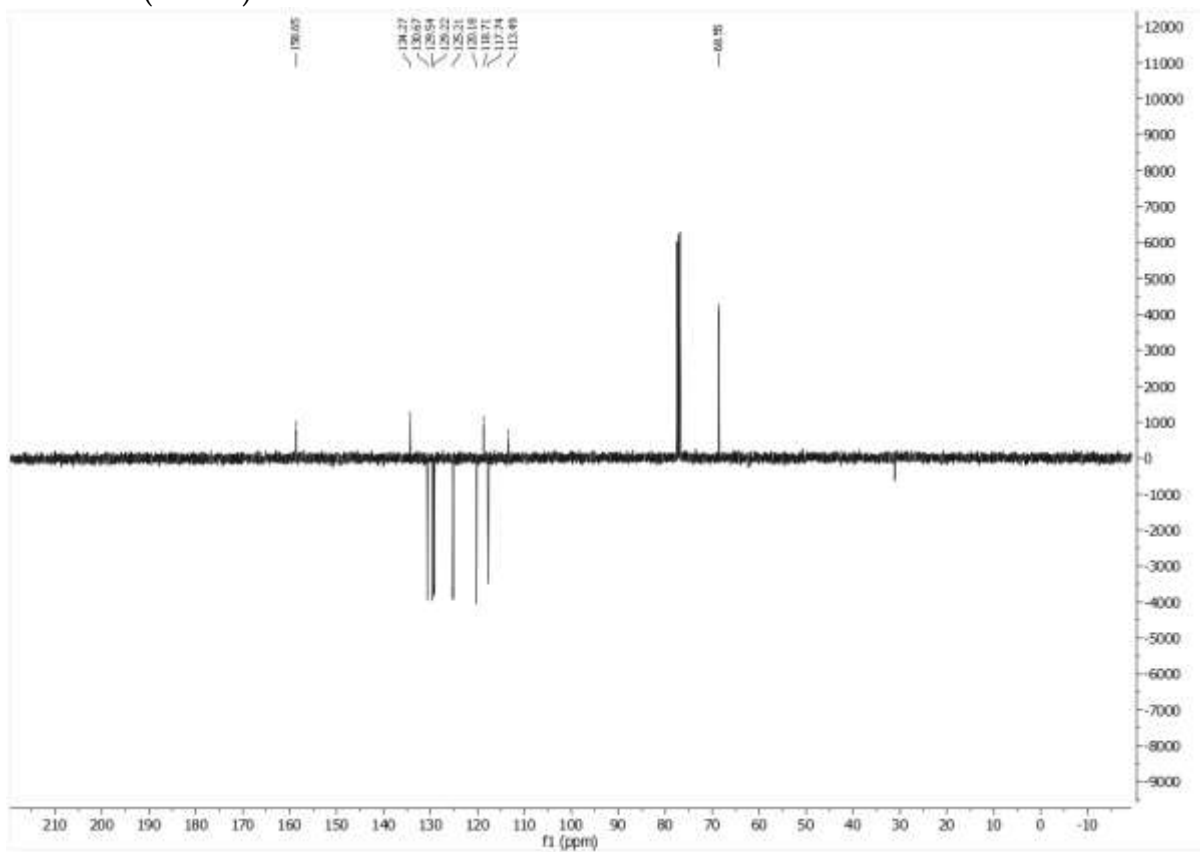

Compound **27**  $^1\text{H}$  NMR ( $\text{CDCl}_3$ )

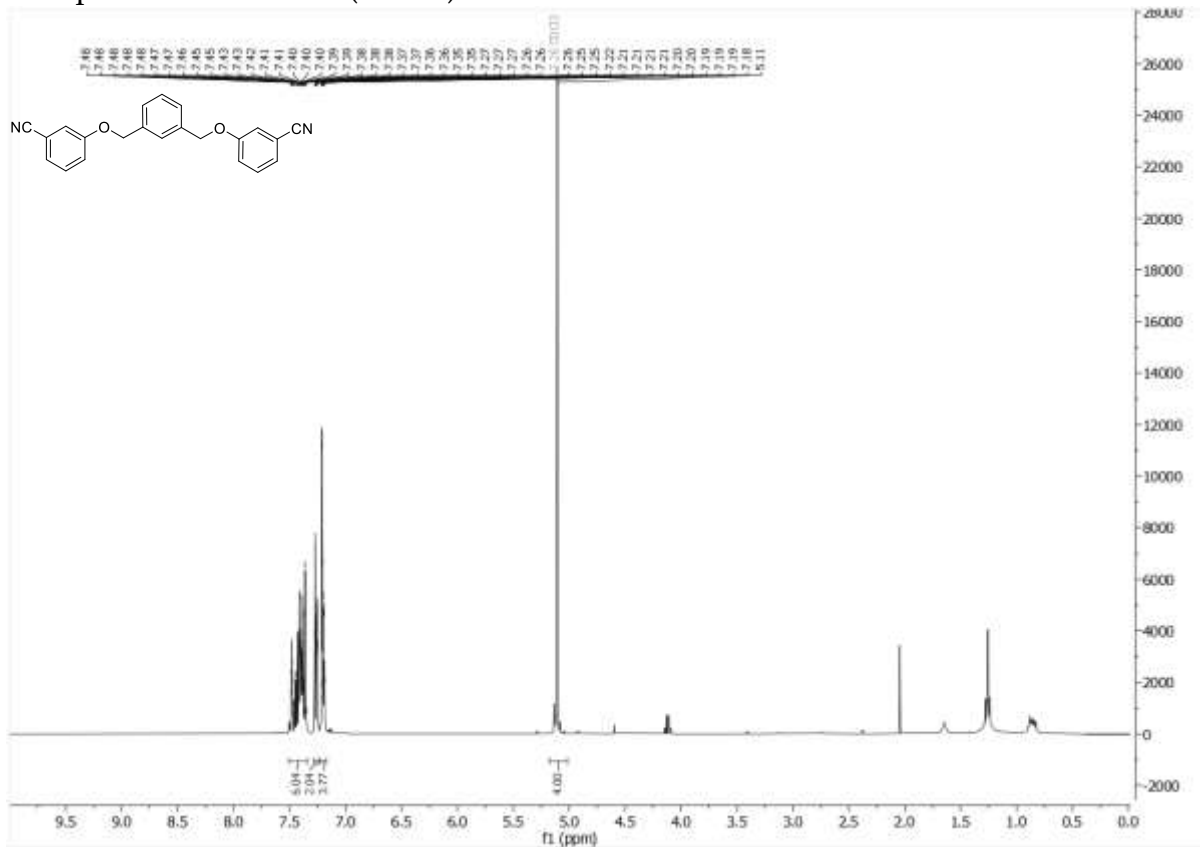

$^{13}\text{C}$  NMR ( $\text{CDCl}_3$ )

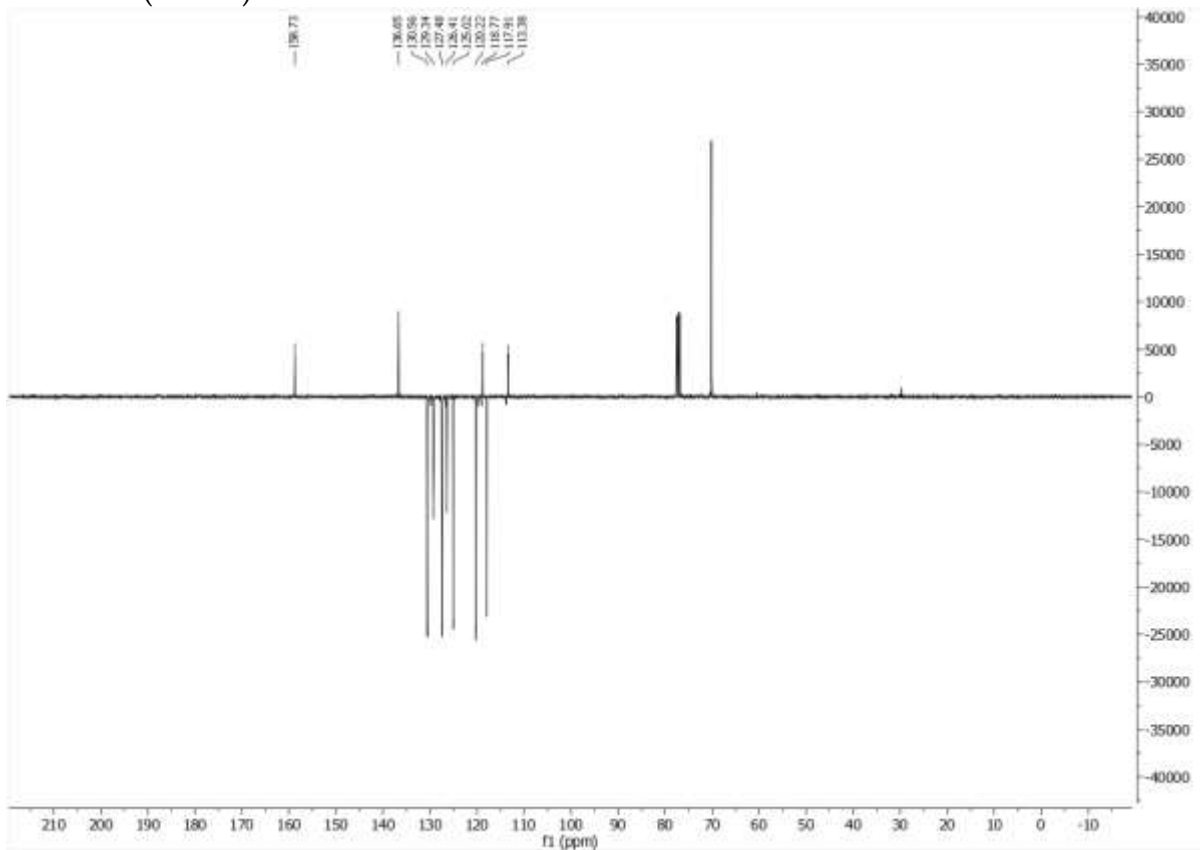

Compound **28**  $^1\text{H}$  NMR ( $\text{CDCl}_3$ )

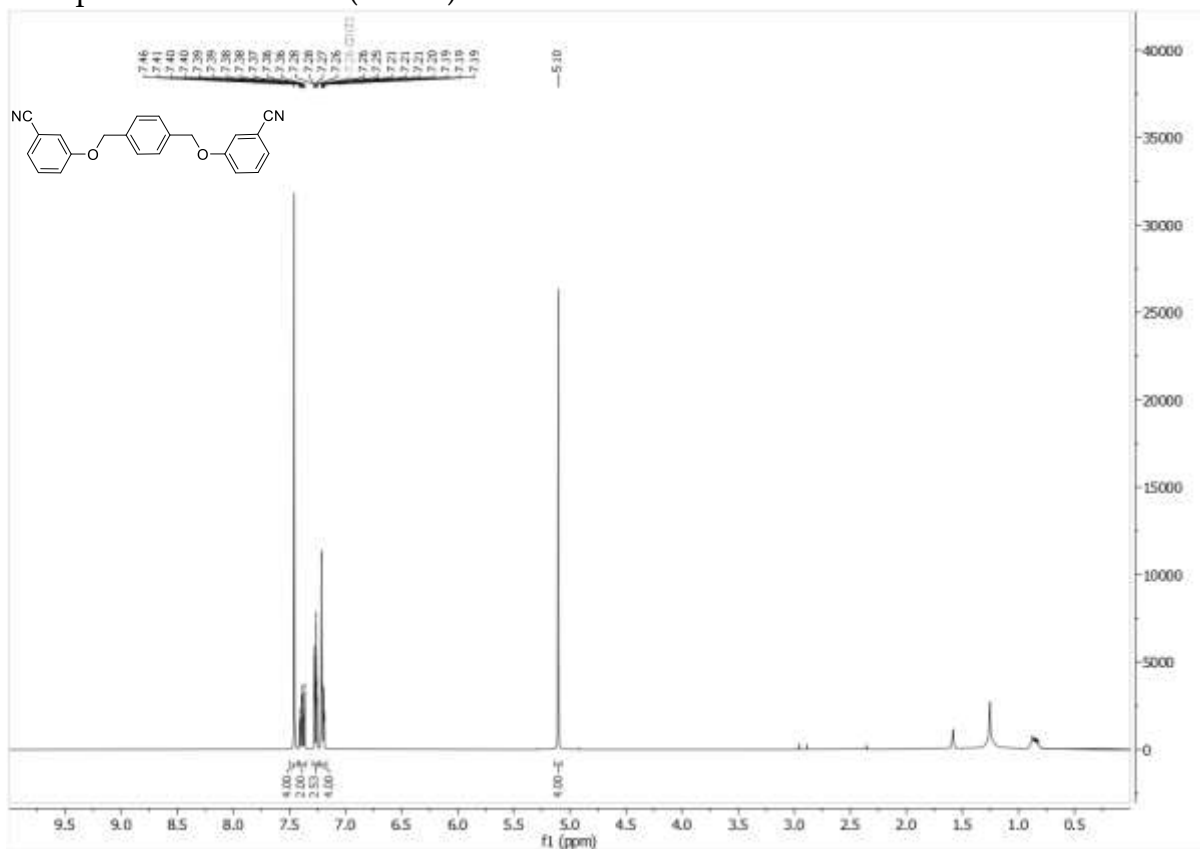

$^{13}\text{C}$  NMR ( $\text{CDCl}_3$ )

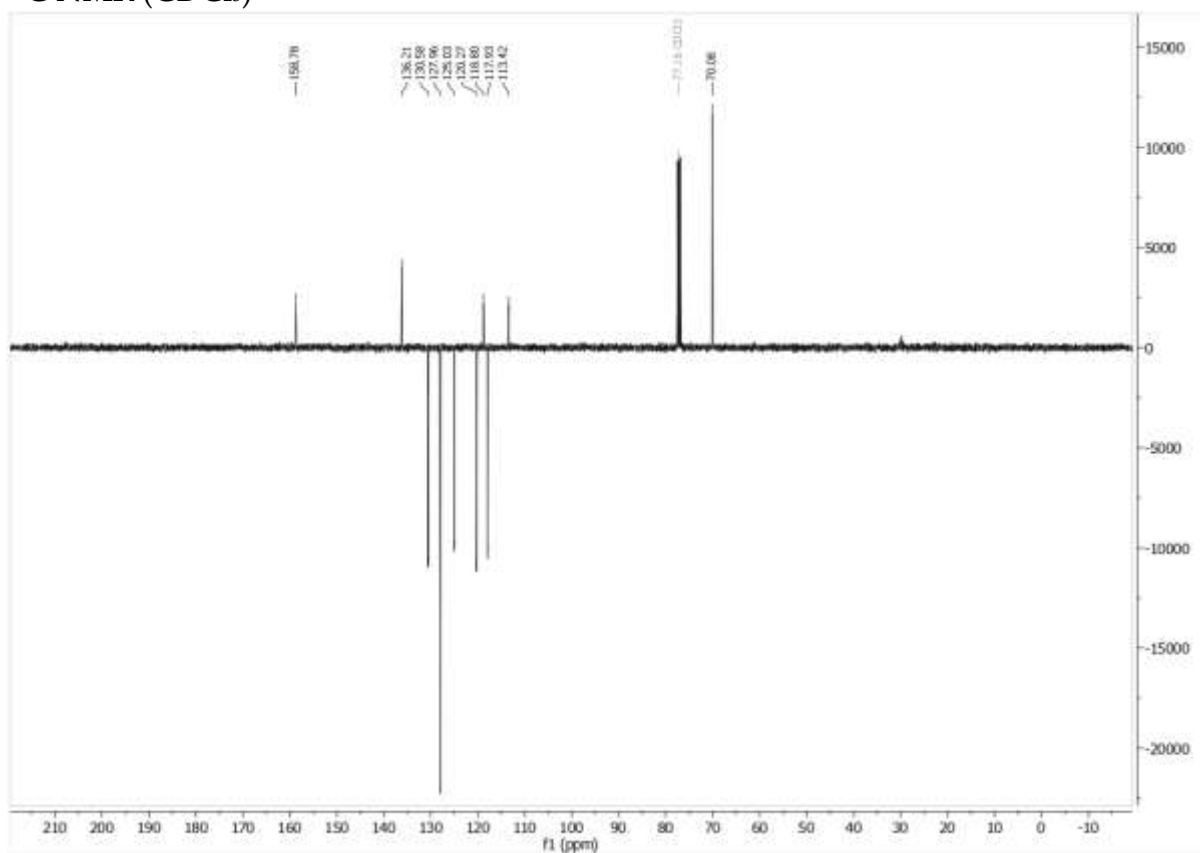

Compound **1b** <sup>1</sup>H NMR (DMSO)

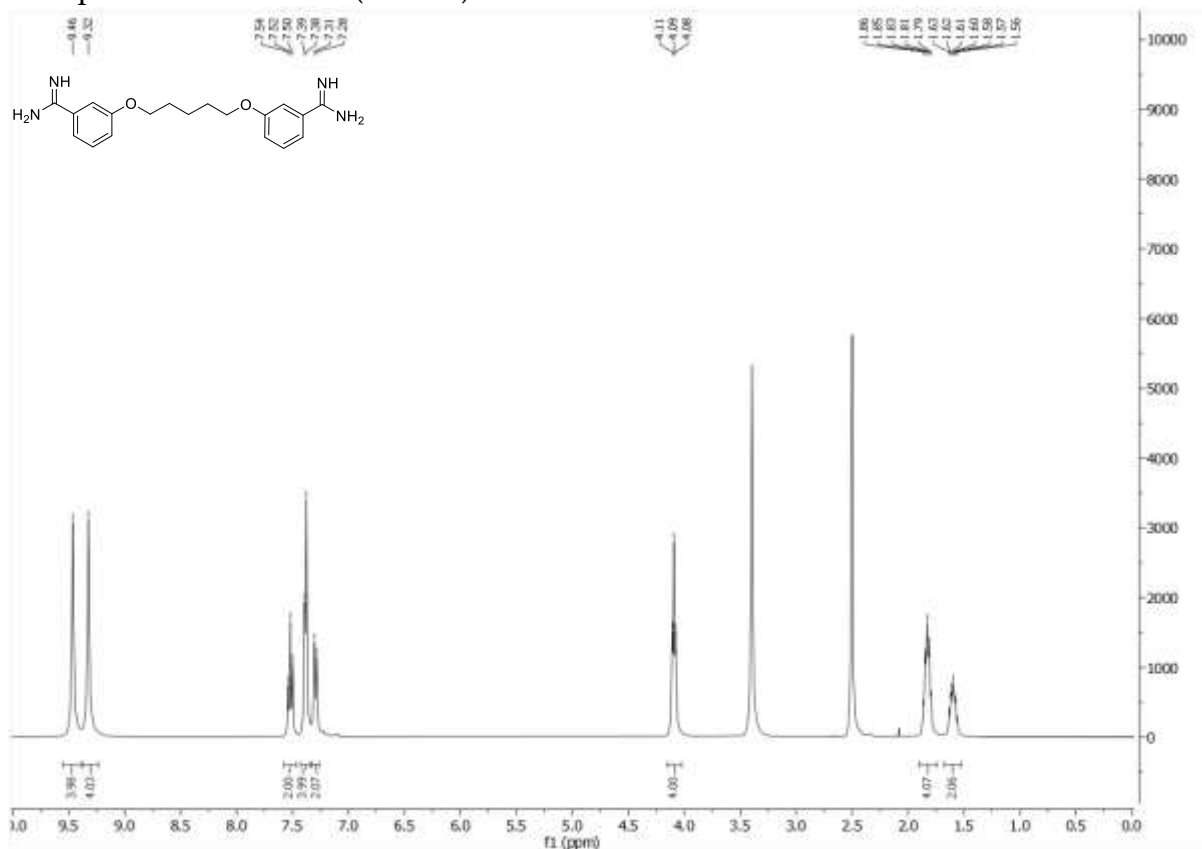

<sup>13</sup>C NMR (DMSO)

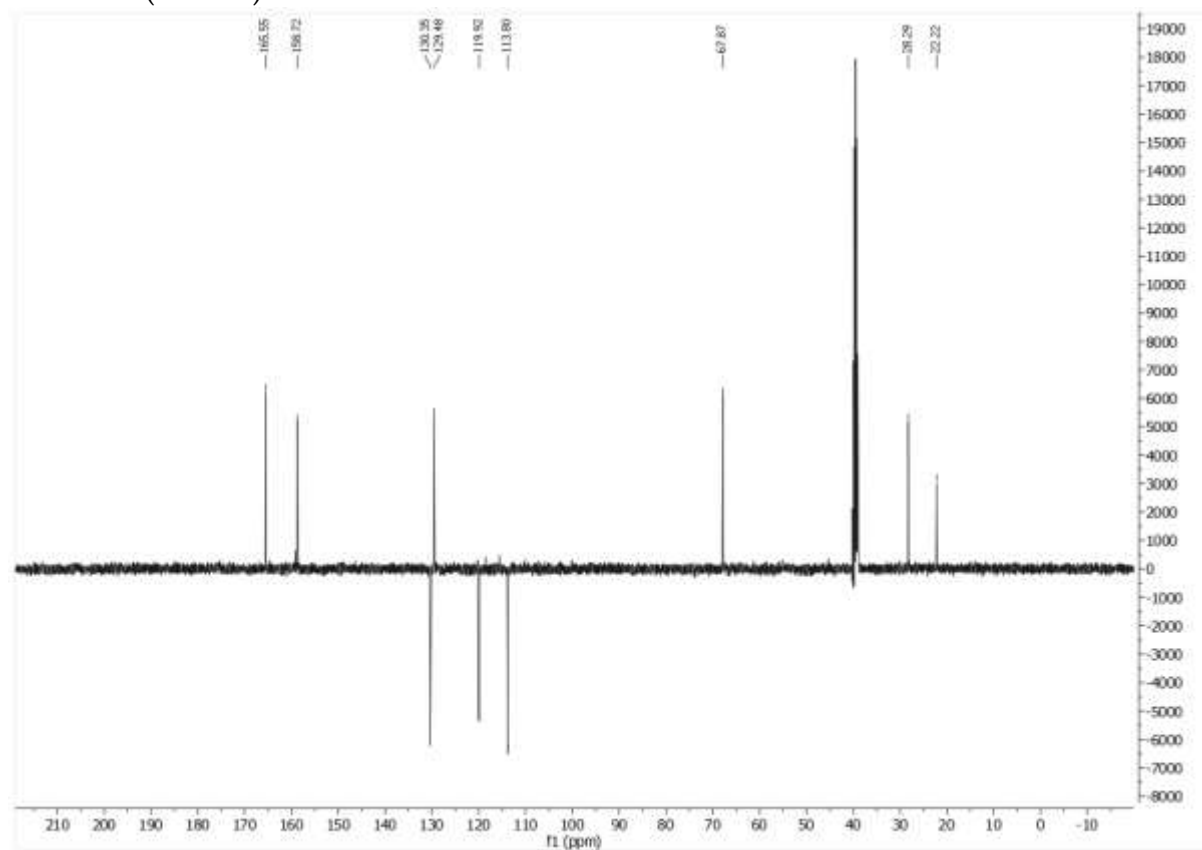

Compound **21b**  $^1\text{H}$  NMR (DMSO)

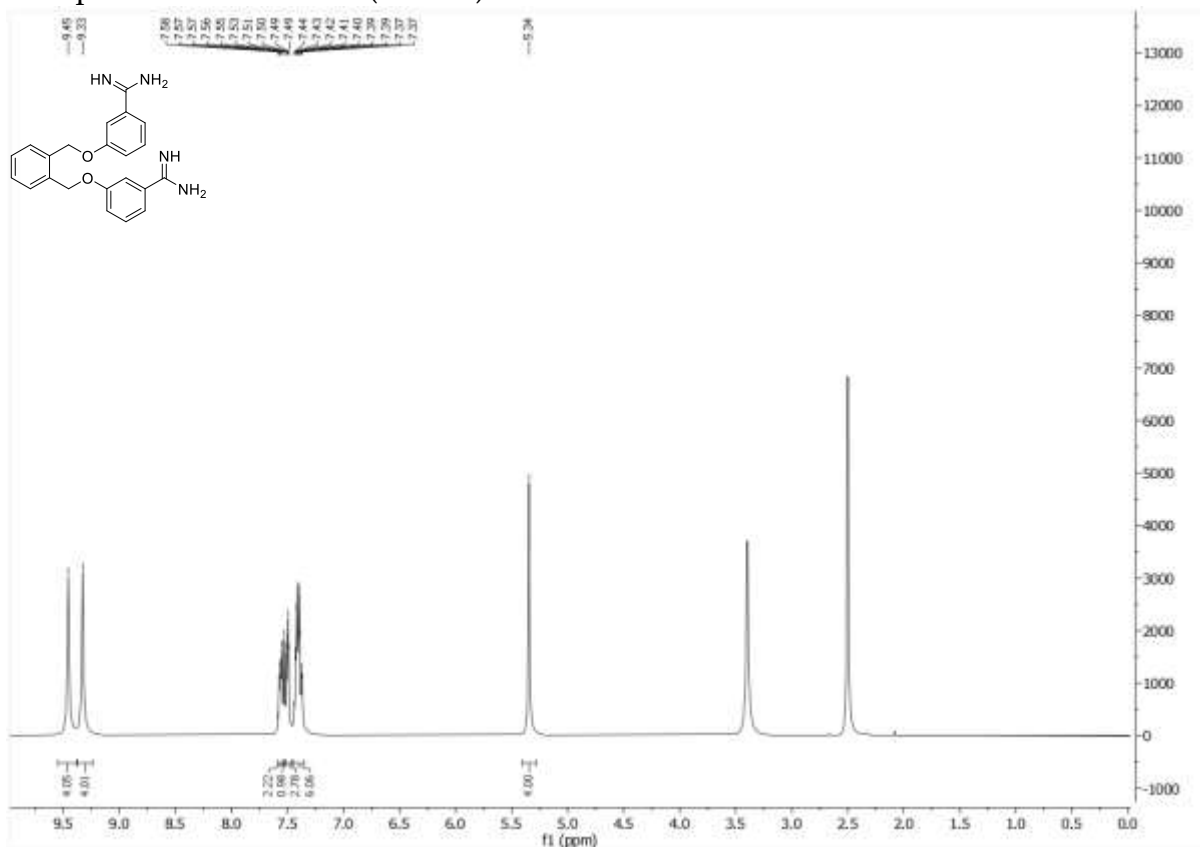

$^{13}\text{C}$  NMR (DMSO)

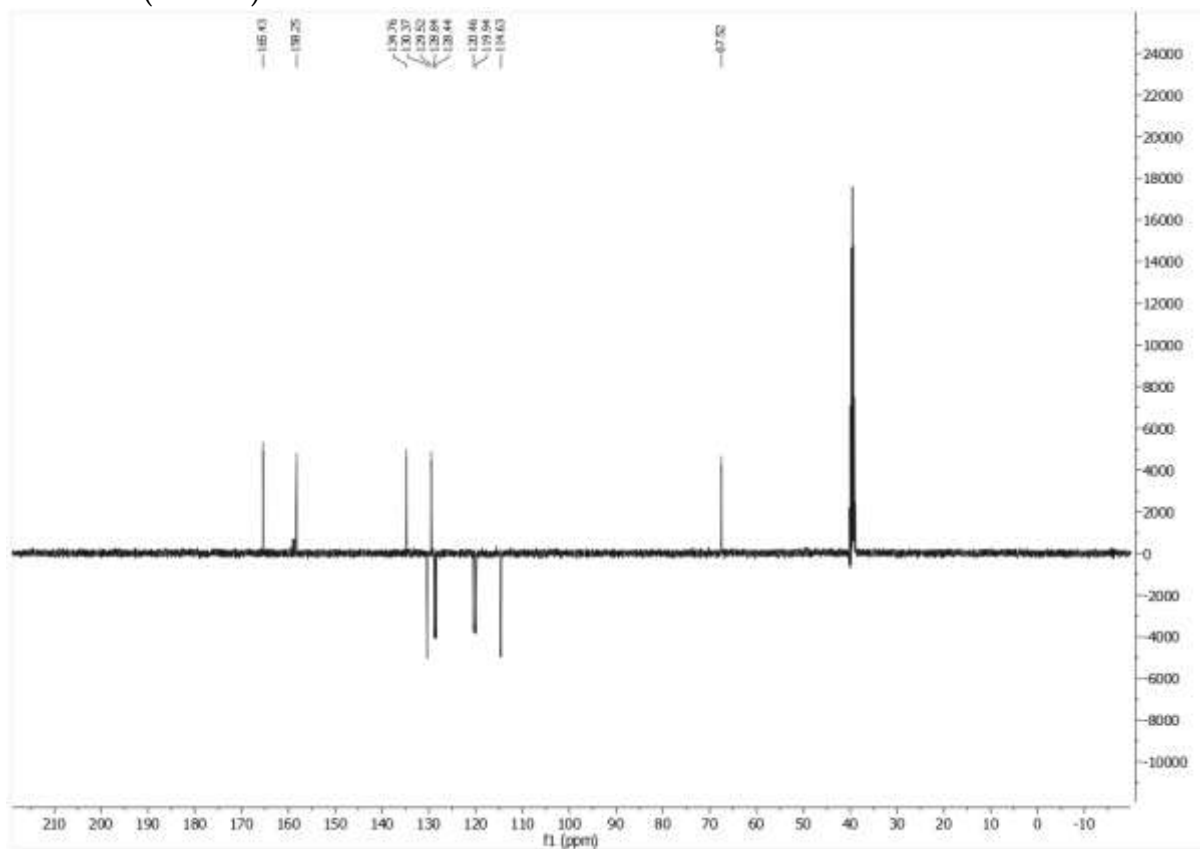



Compound **22b** <sup>1</sup>H NMR (DMSO)

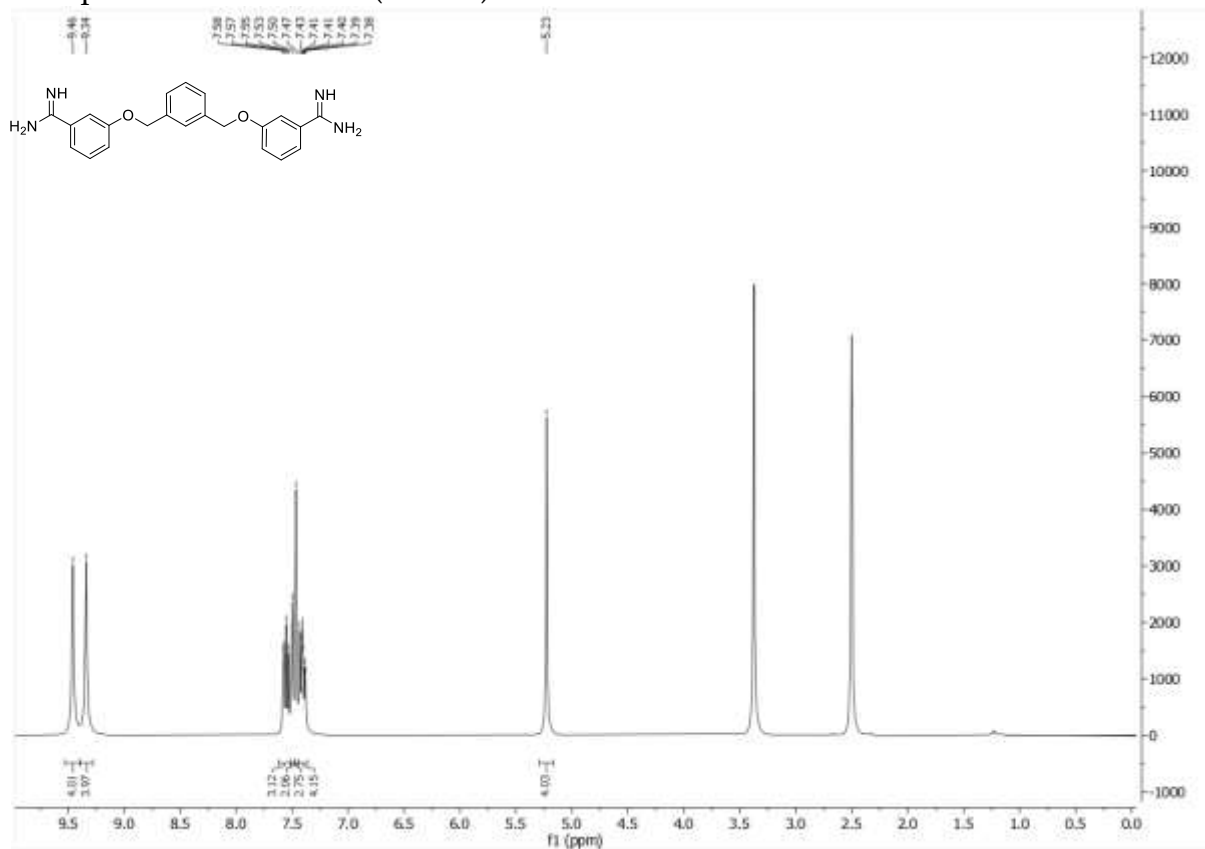

<sup>13</sup>C NMR (DMSO)

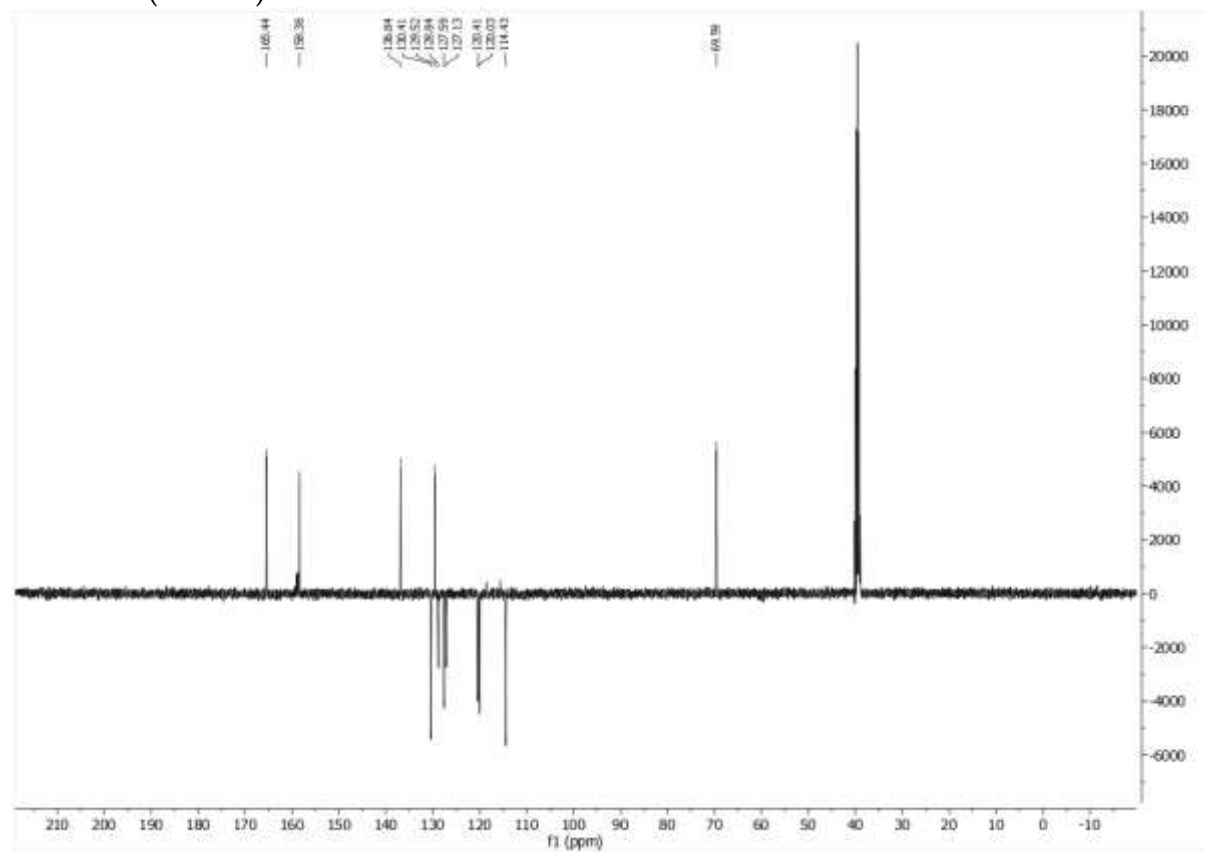

### Compound 23b <sup>1</sup>H NMR (DMSO)

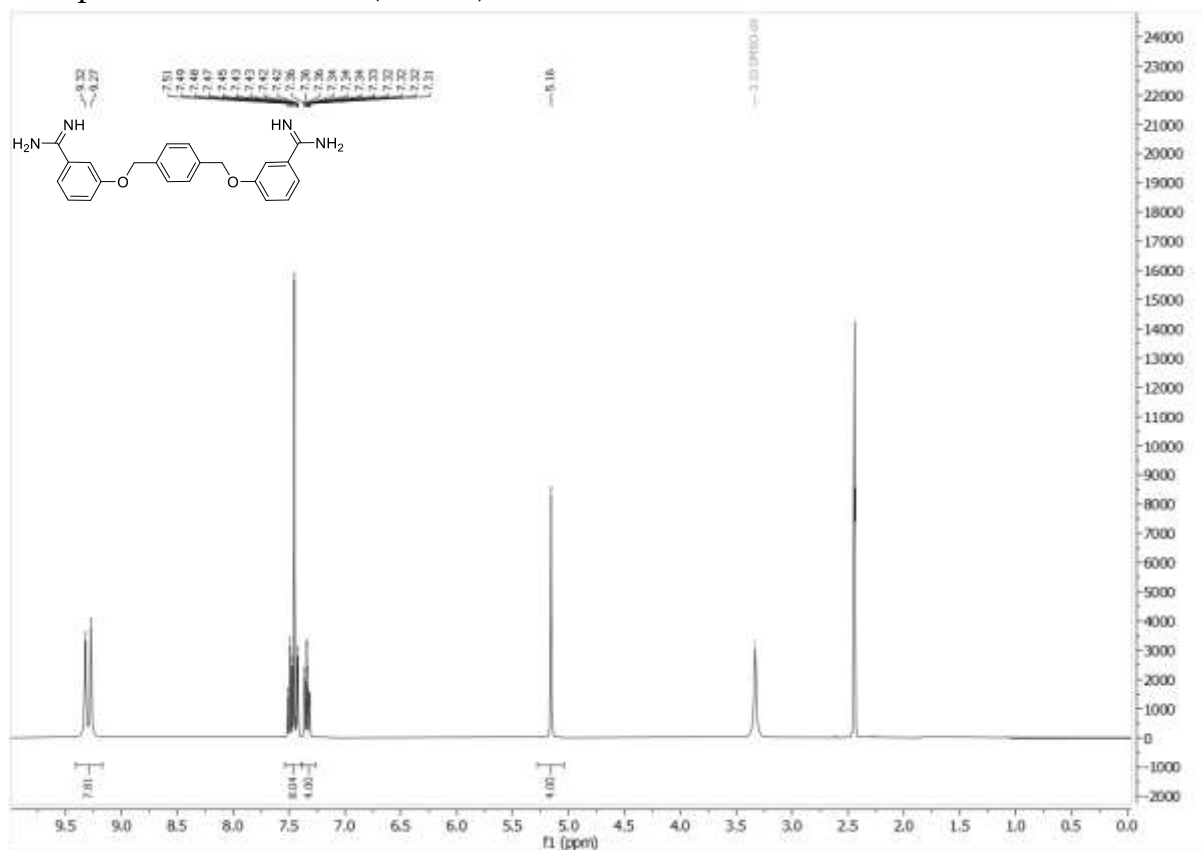

### <sup>13</sup>C NMR (DMSO)

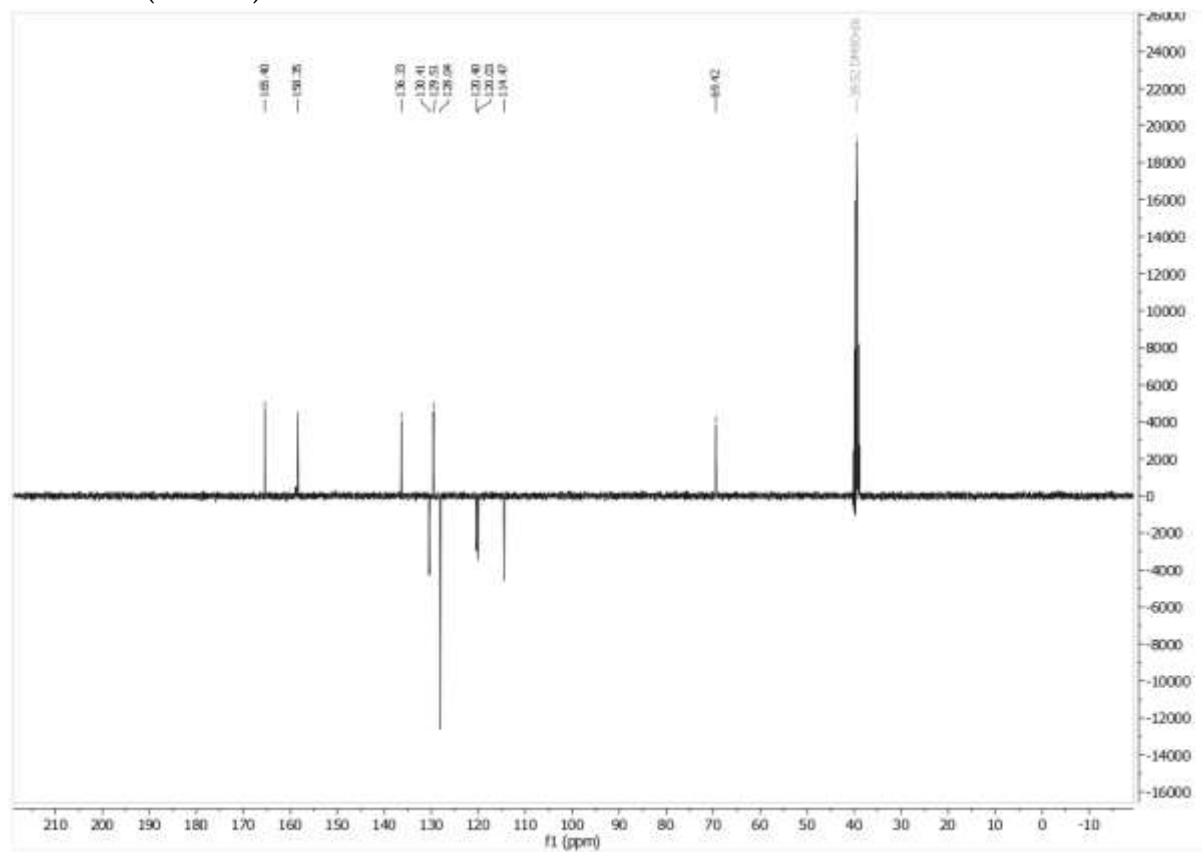

Compound **29**  $^1\text{H}$  NMR ( $\text{CDCl}_3$ )

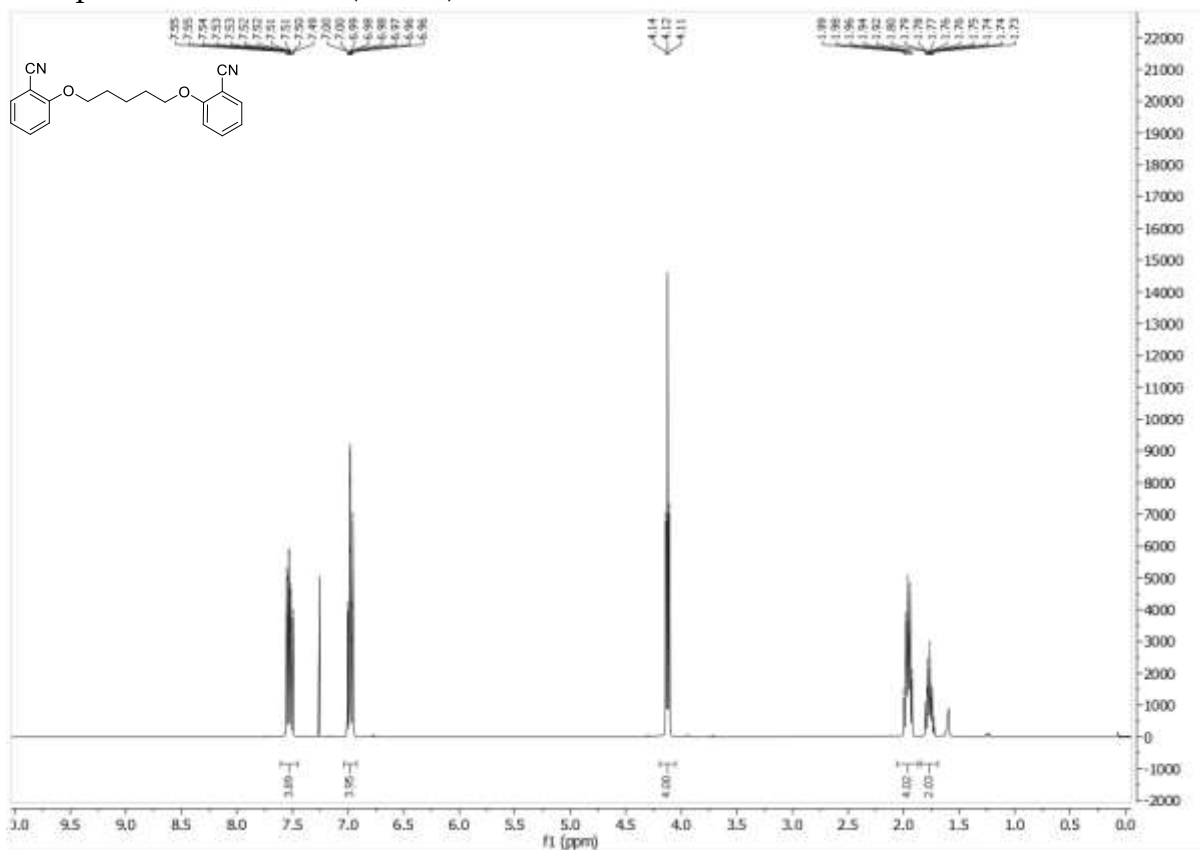

$^{13}\text{C}$  NMR ( $\text{CDCl}_3$ )

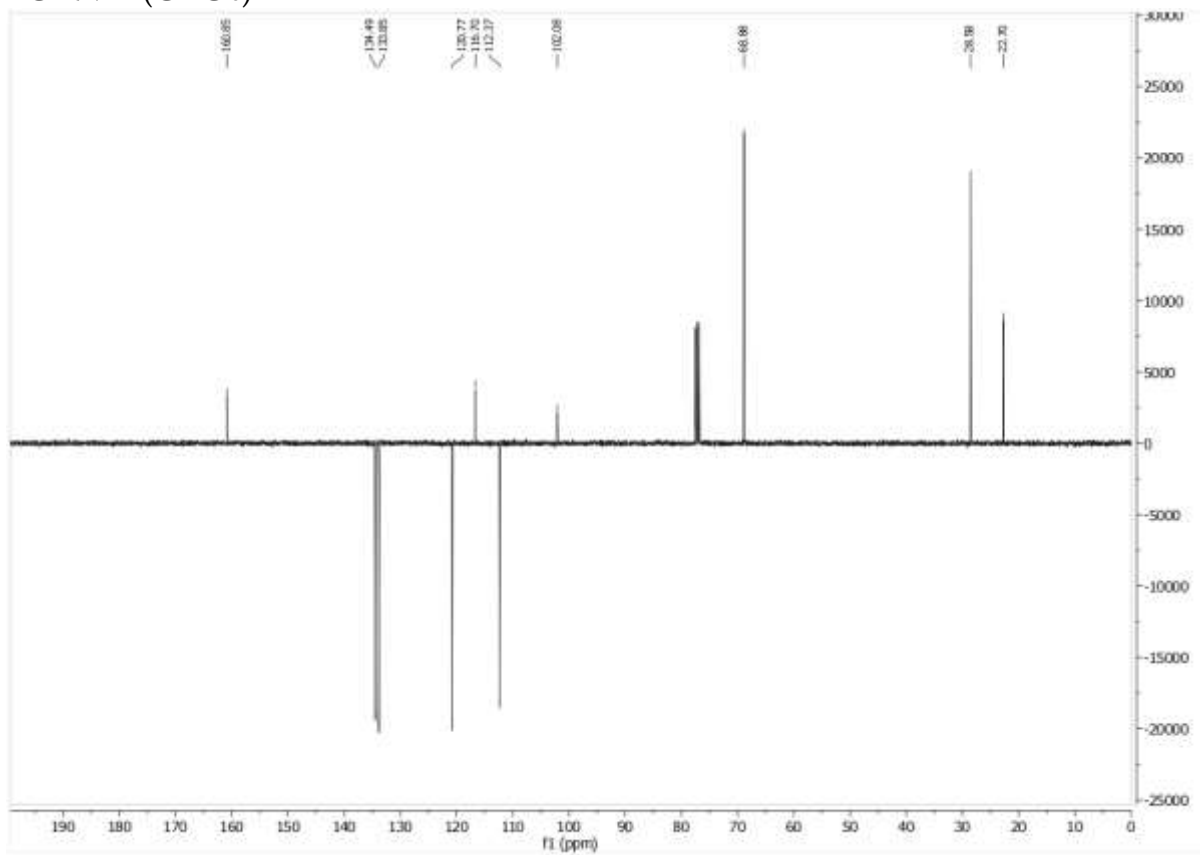

Compound **30**  $^1\text{H}$  NMR ( $\text{CDCl}_3$ )

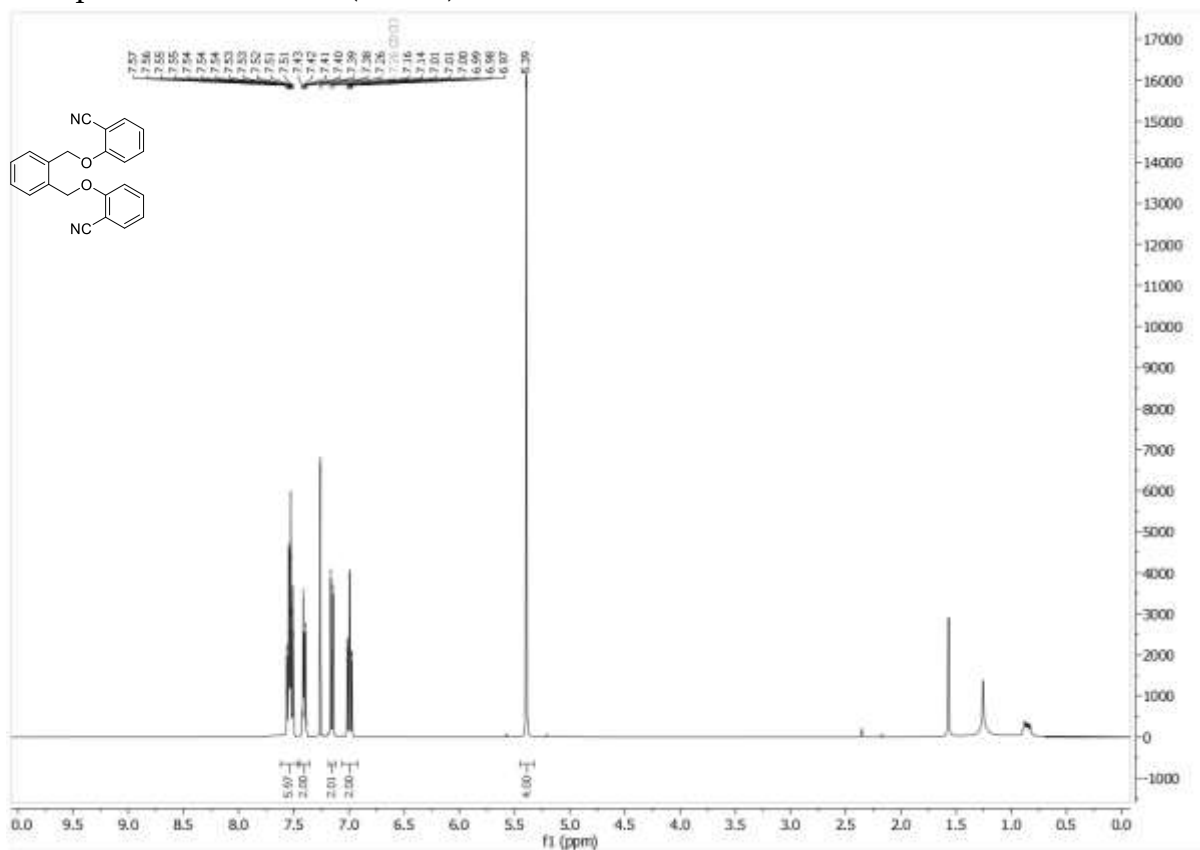

$^{13}\text{C}$  NMR ( $\text{CDCl}_3$ )

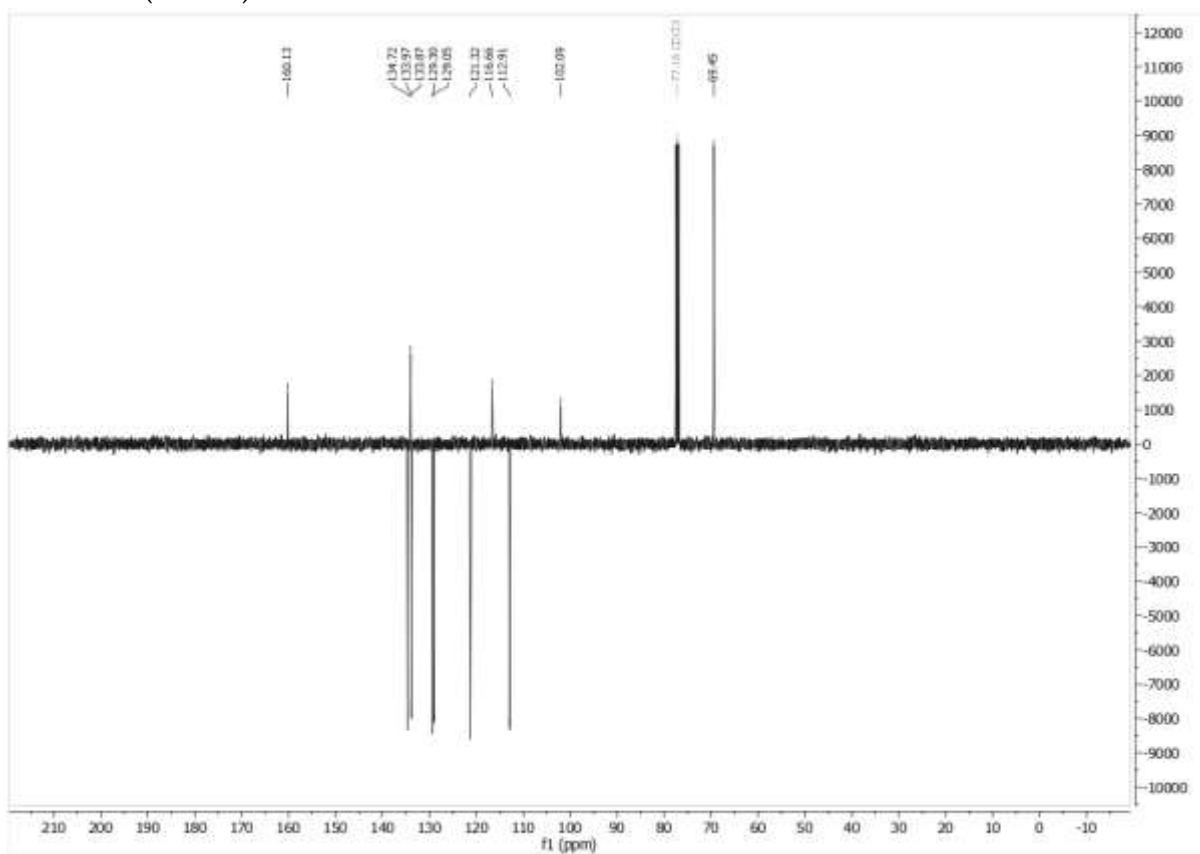

Compound **31**  $^1\text{H}$  NMR ( $\text{CDCl}_3$ )

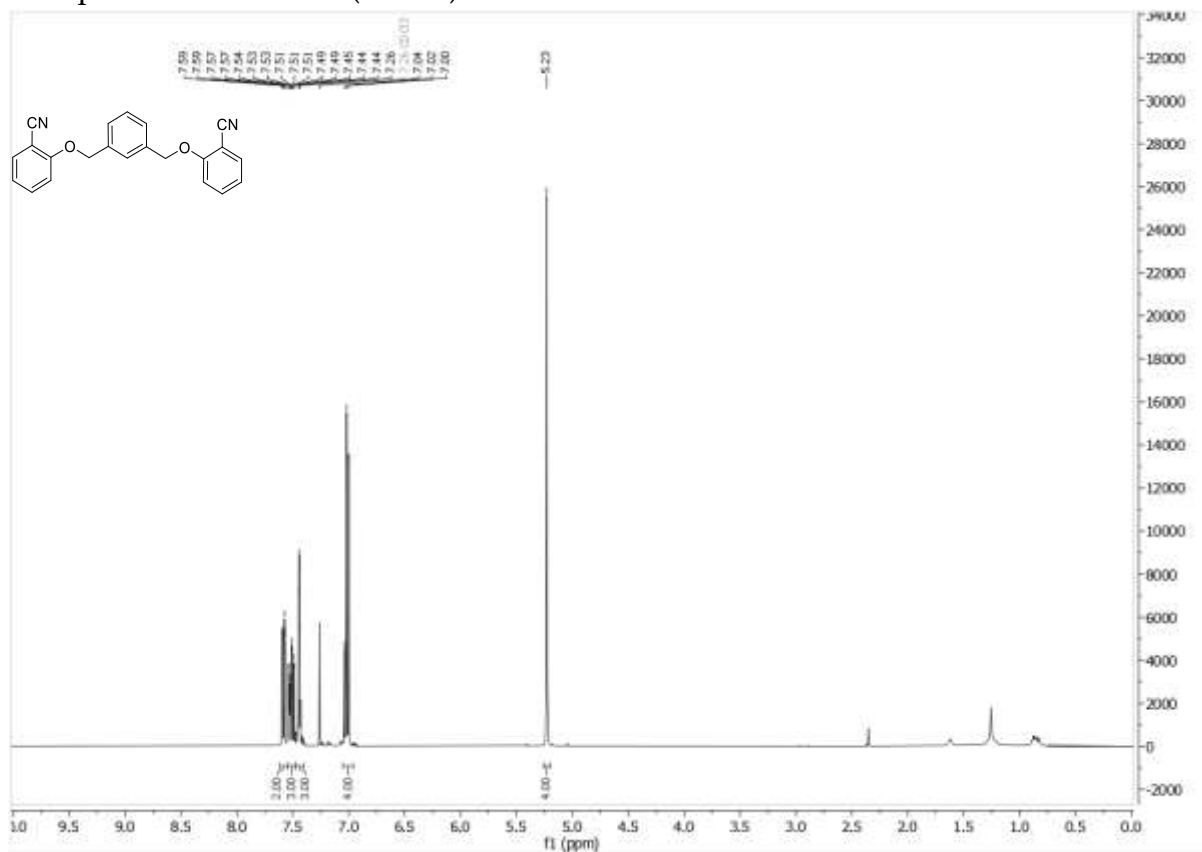

$^{13}\text{C}$  NMR ( $\text{CDCl}_3$ )

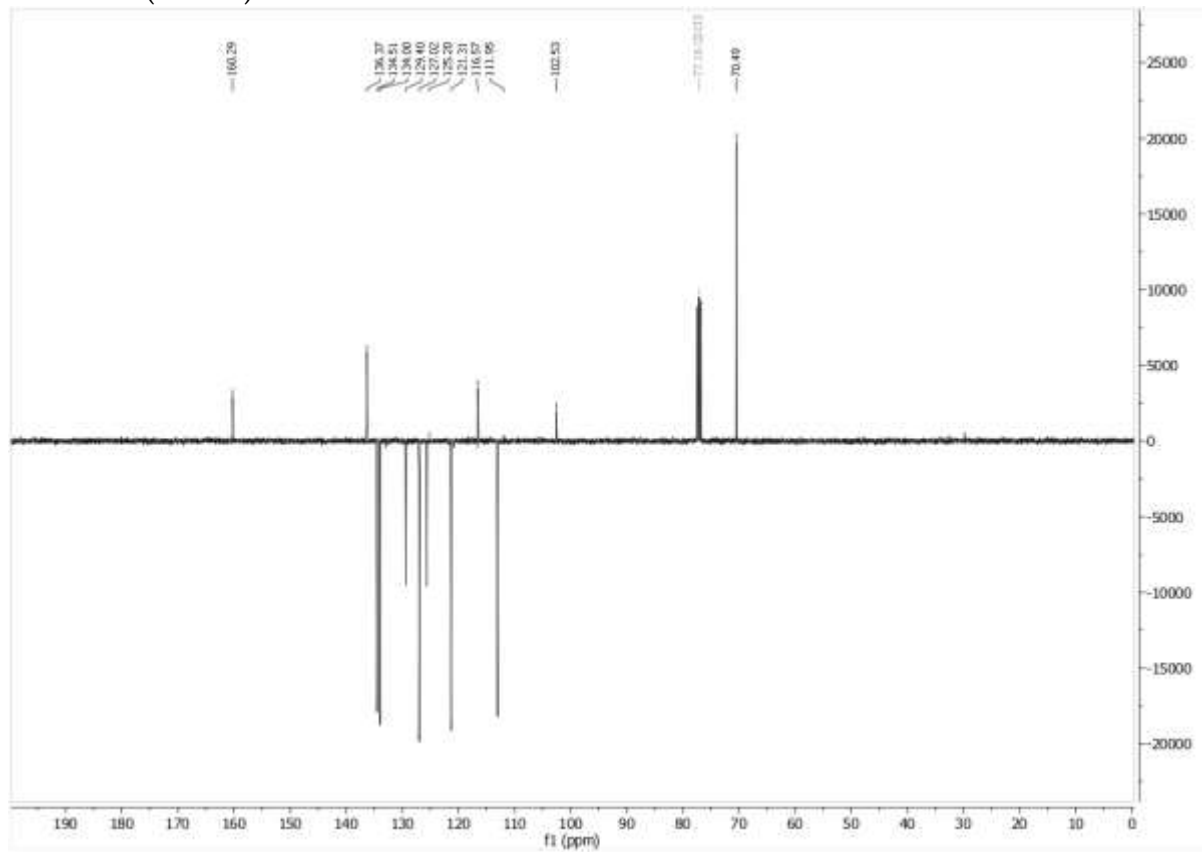

Compound **32**  $^1\text{H}$  NMR ( $\text{CDCl}_3$ )

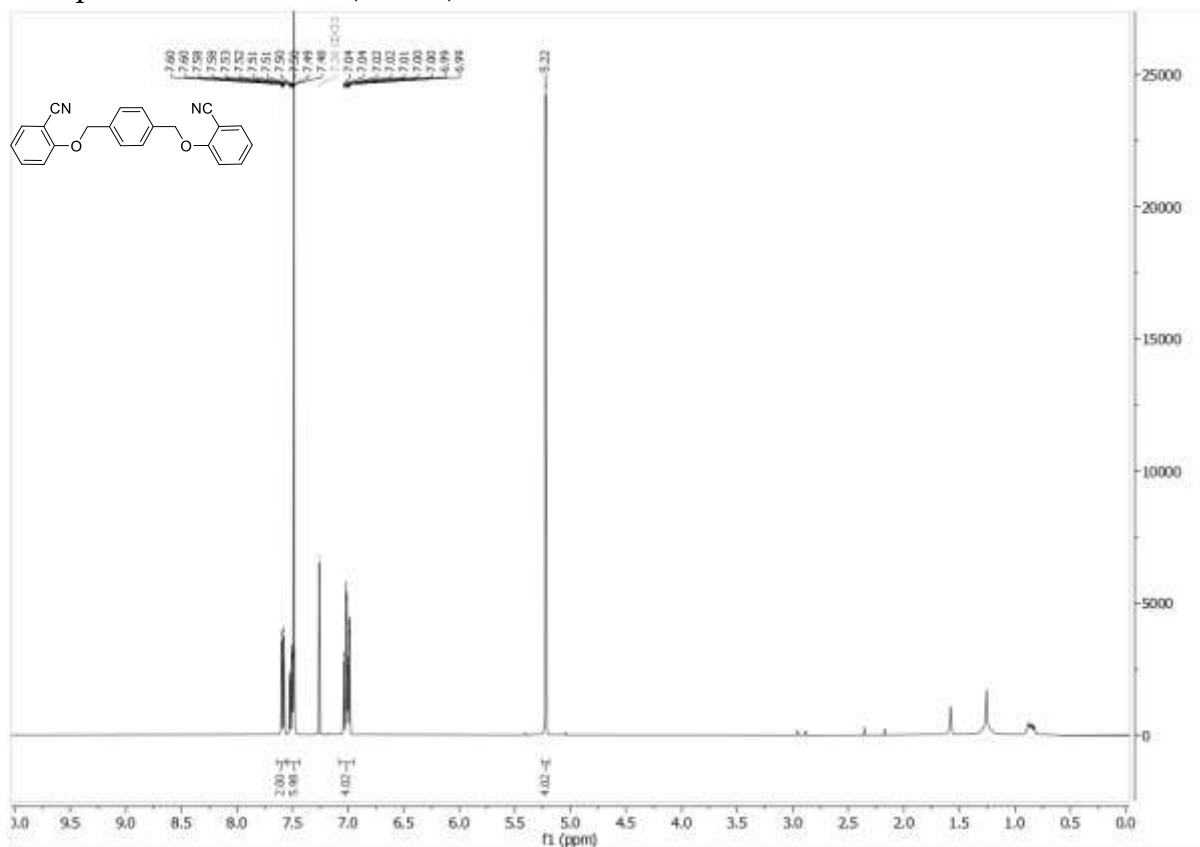

$^{13}\text{C}$  NMR ( $\text{CDCl}_3$ )

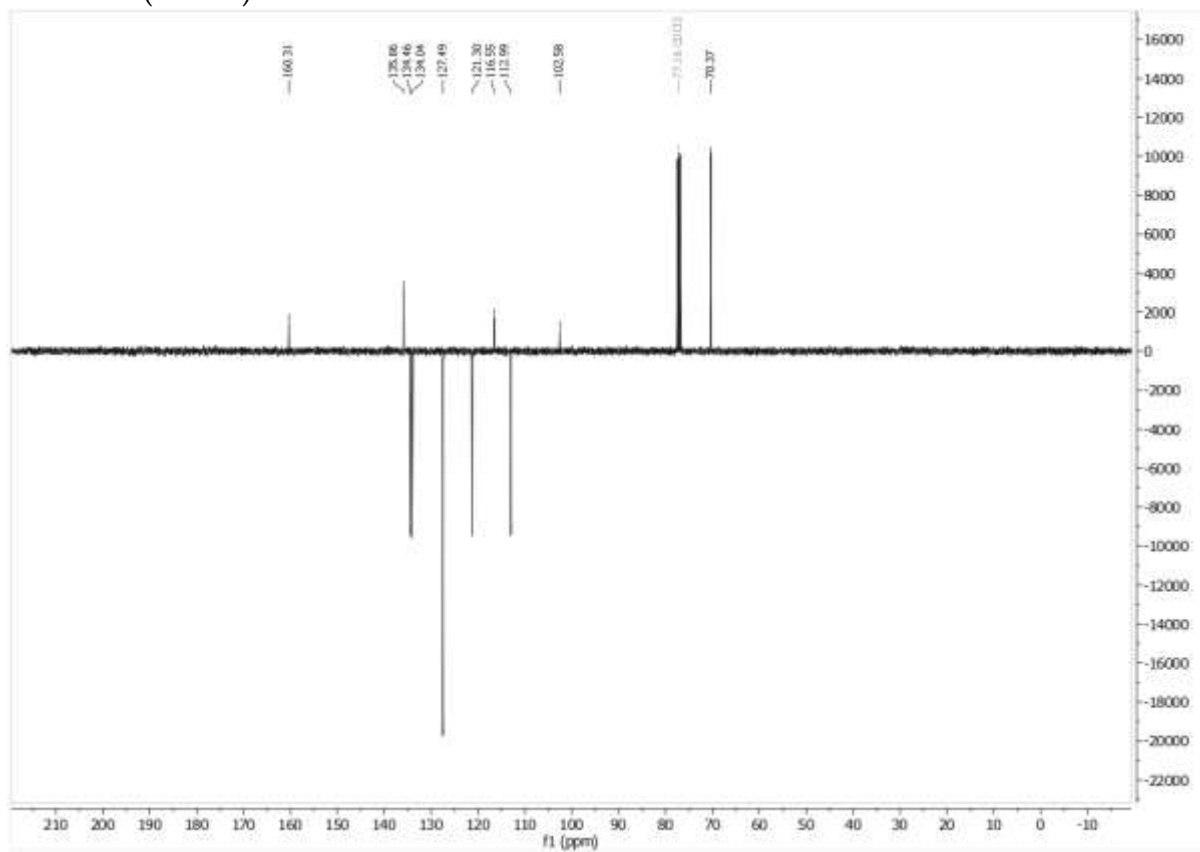

### Compound 1c <sup>1</sup>H NMR (DMSO)

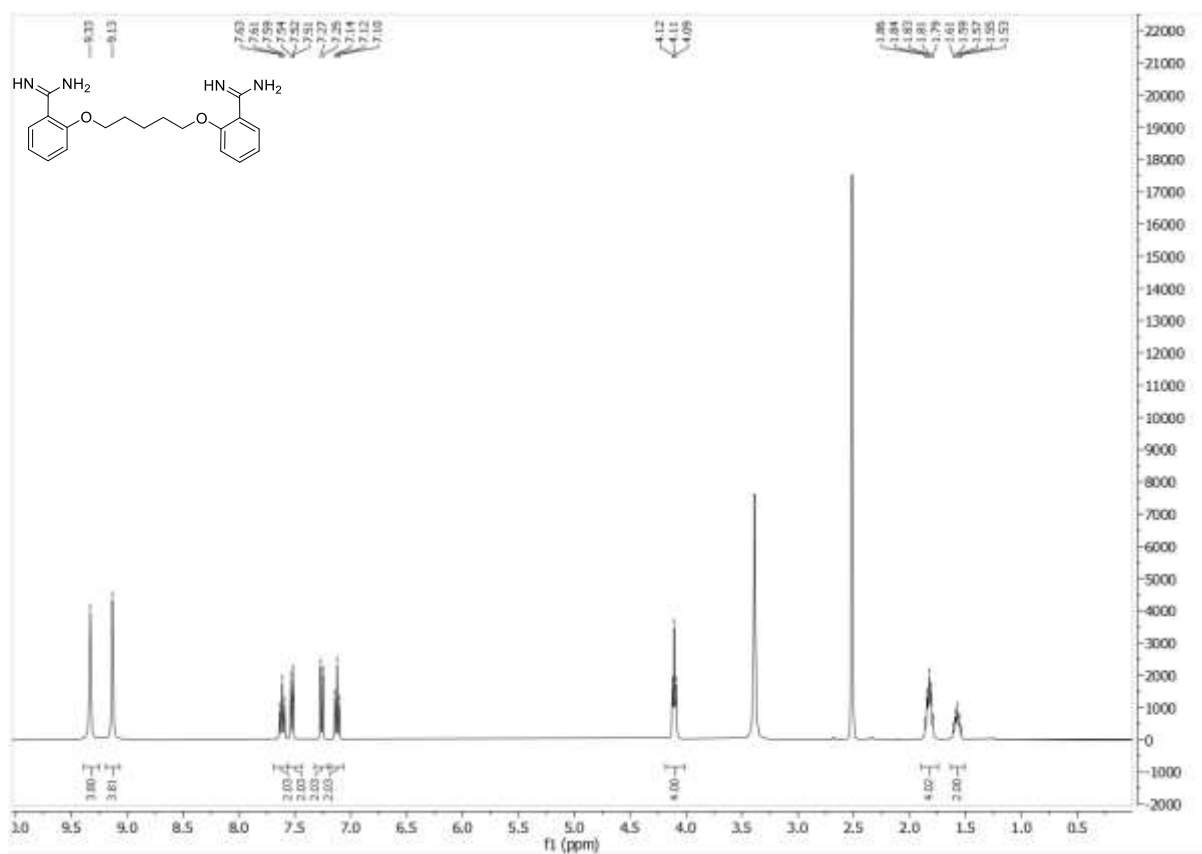

### <sup>13</sup>C NMR (DMSO)

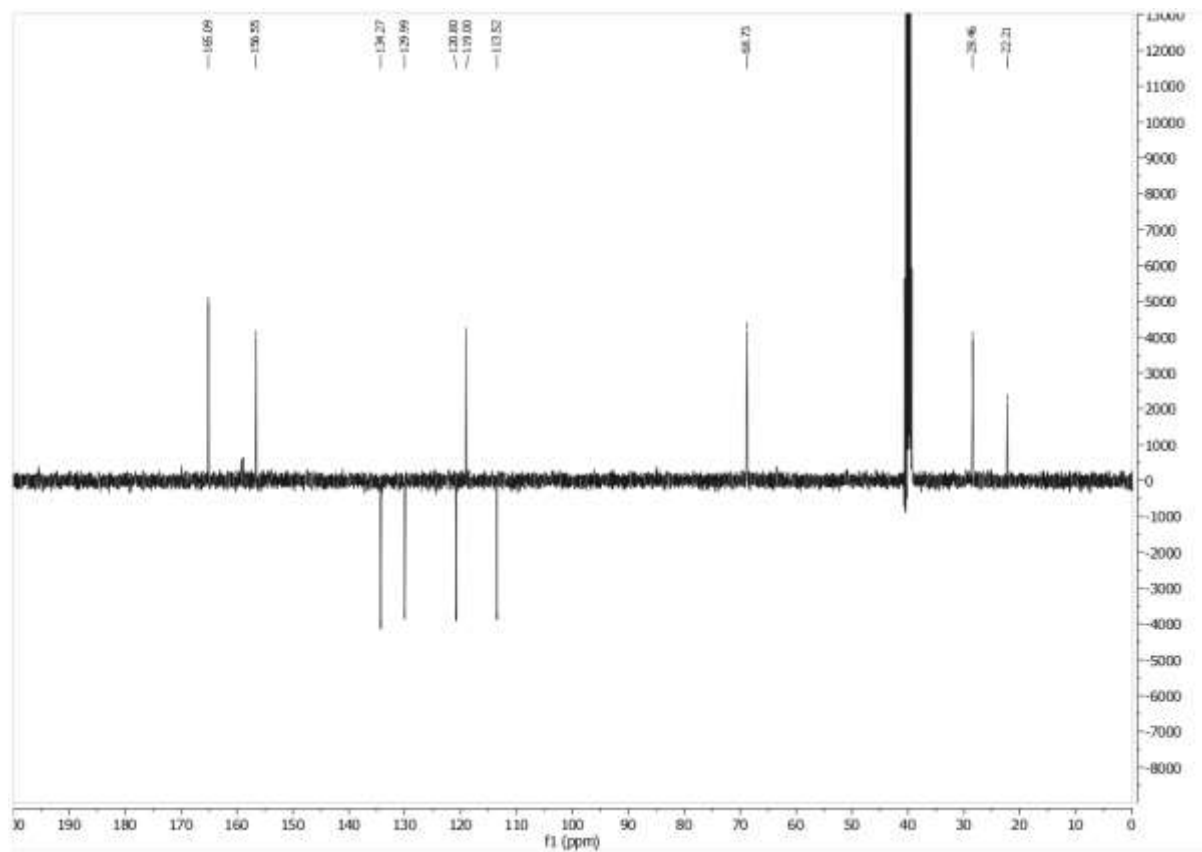

Compound **21c**  $^1\text{H}$  NMR (DMSO)

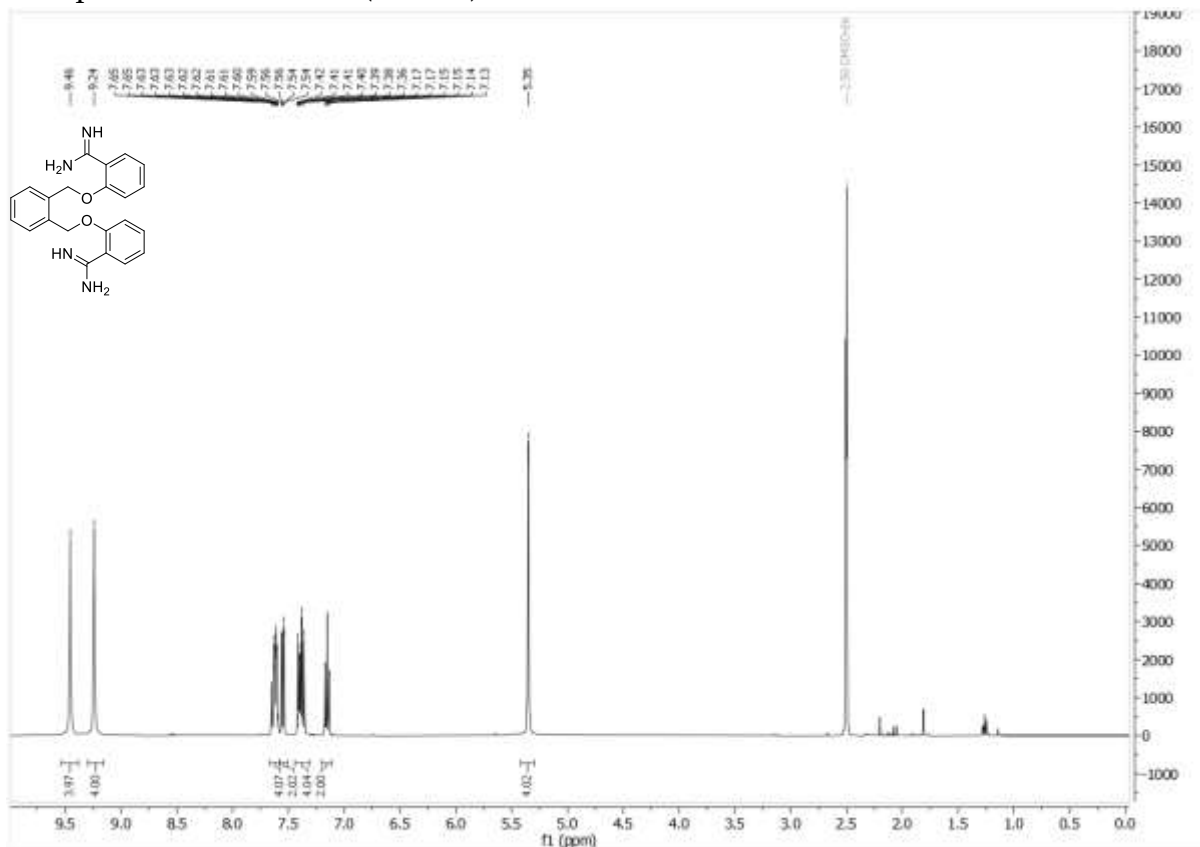

$^{13}\text{C}$  NMR (DMSO)

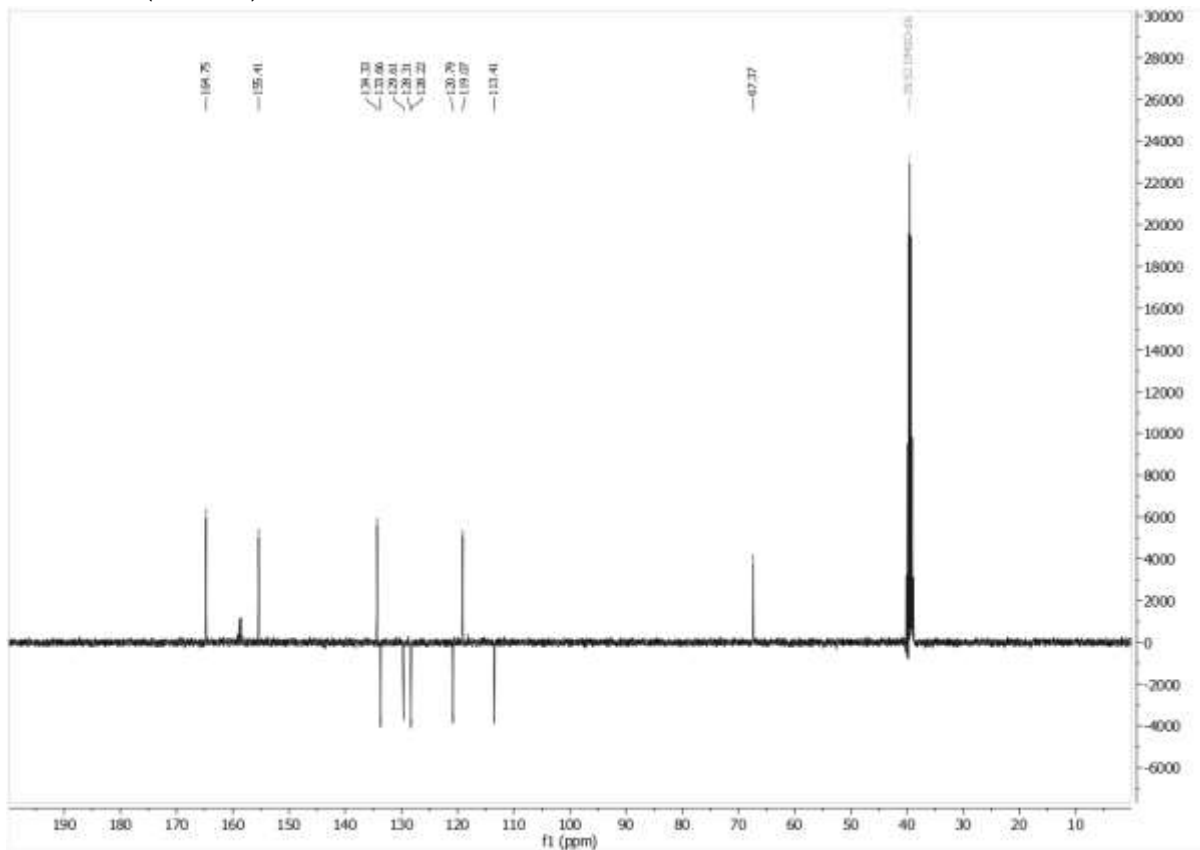



Compound **22c**  $^1\text{H}$  NMR (DMSO)

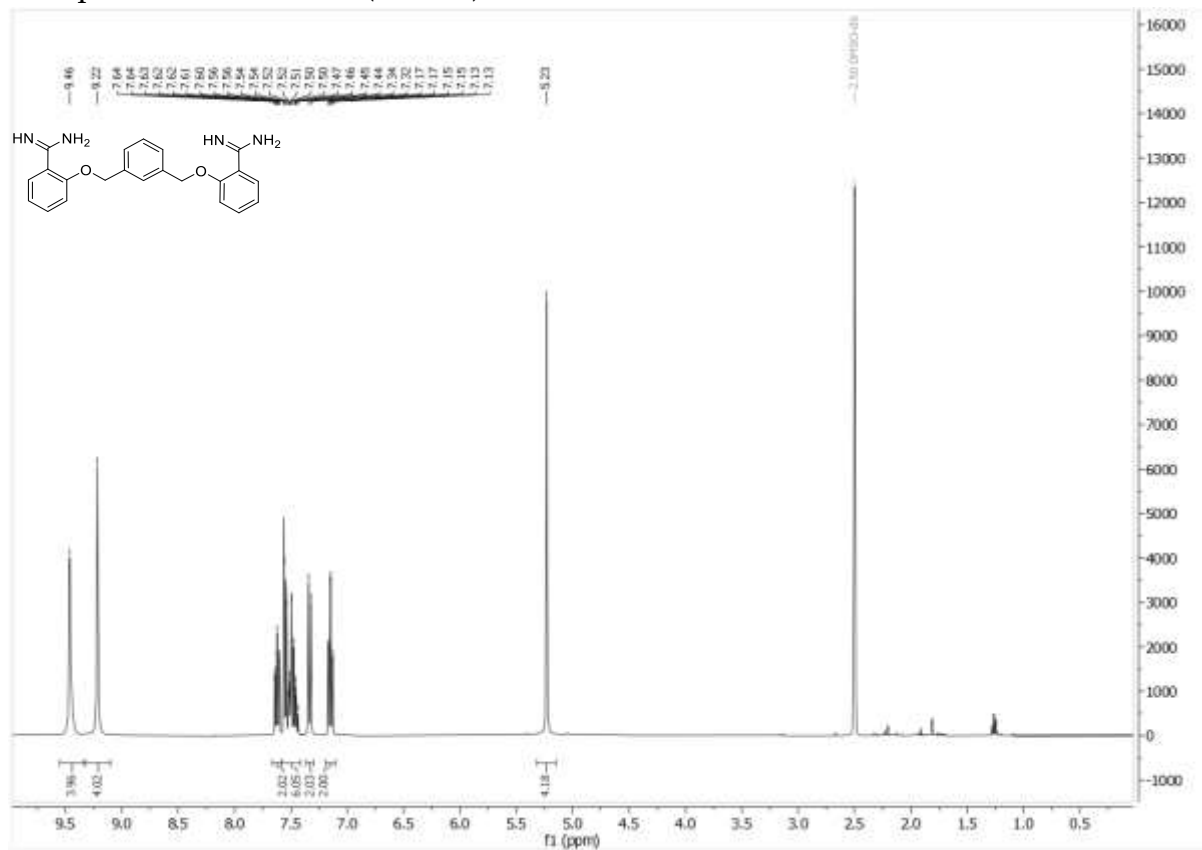

$^{13}\text{C}$  NMR (DMSO)

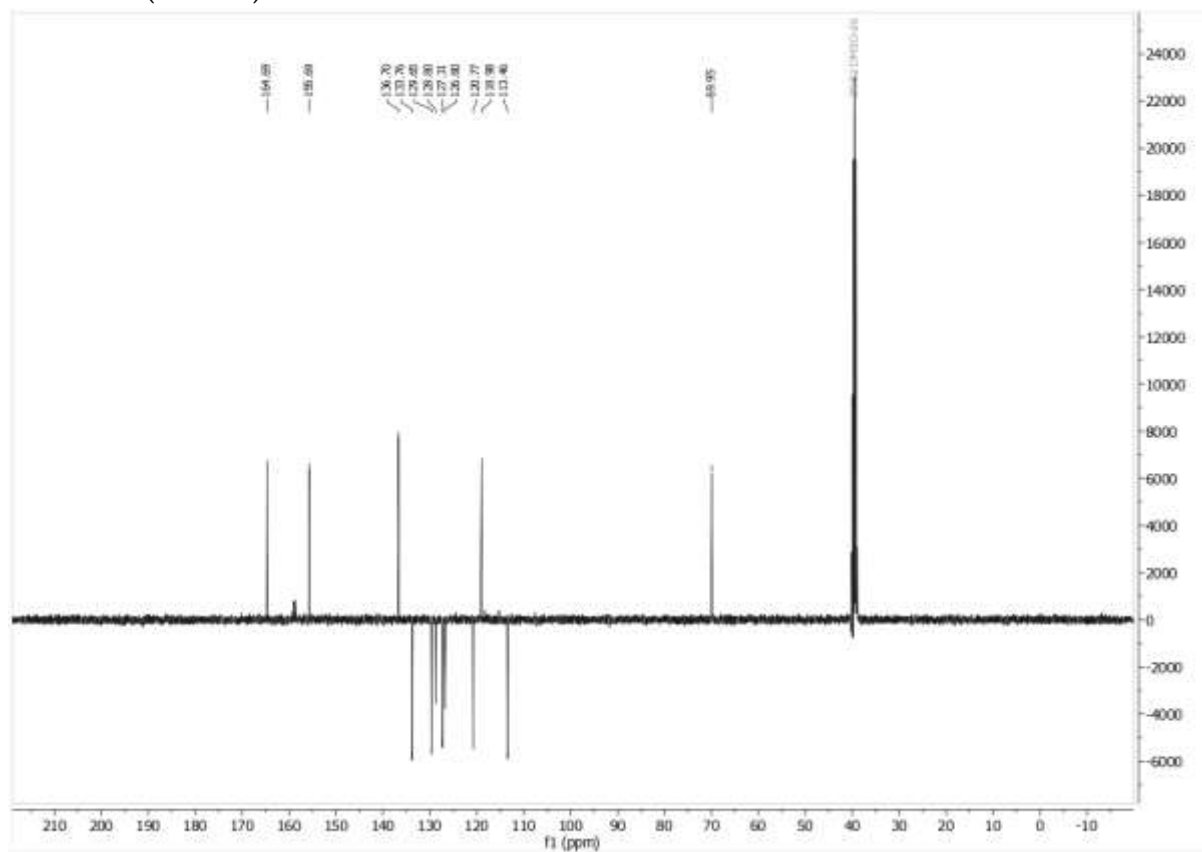

Compound **23c**  $^1\text{H}$  NMR (DMSO)

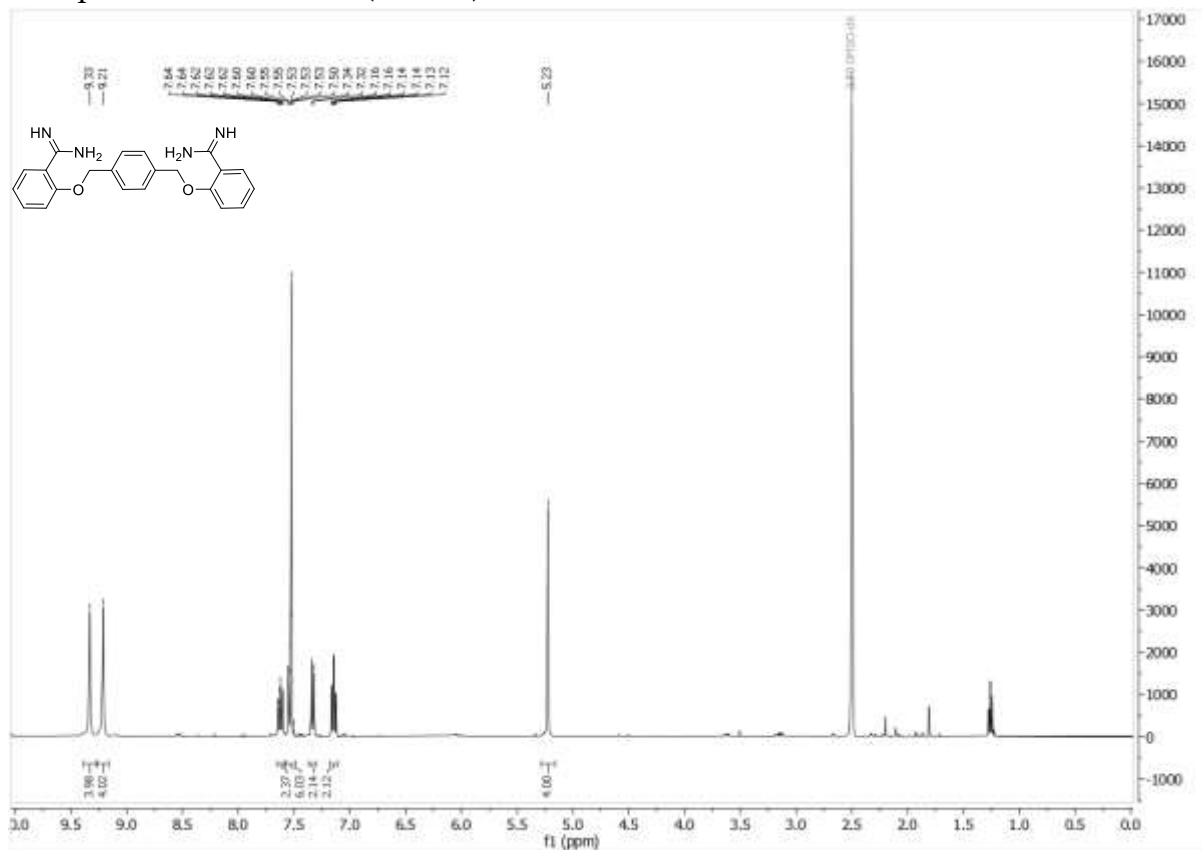

$^{13}\text{C}$  NMR (DMSO)

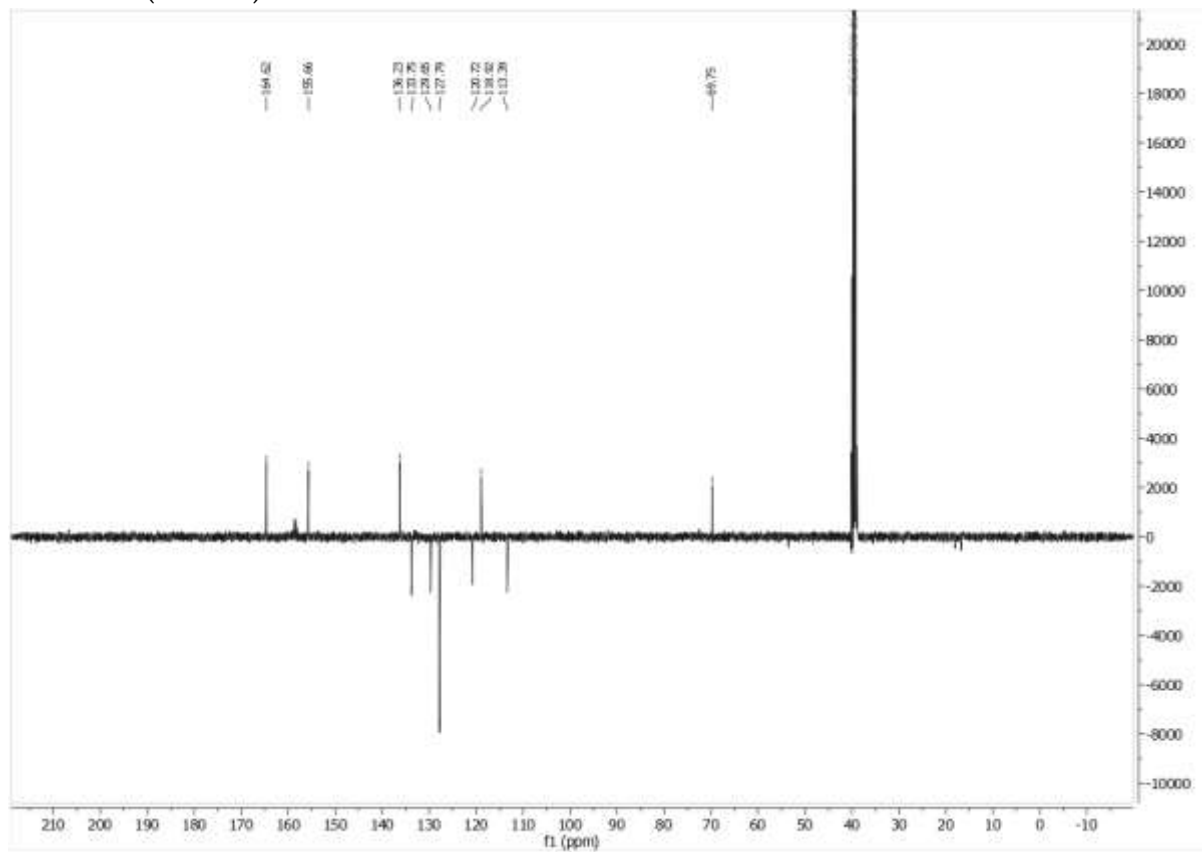

### Compound **33** $^1\text{H}$ NMR (MeOD)

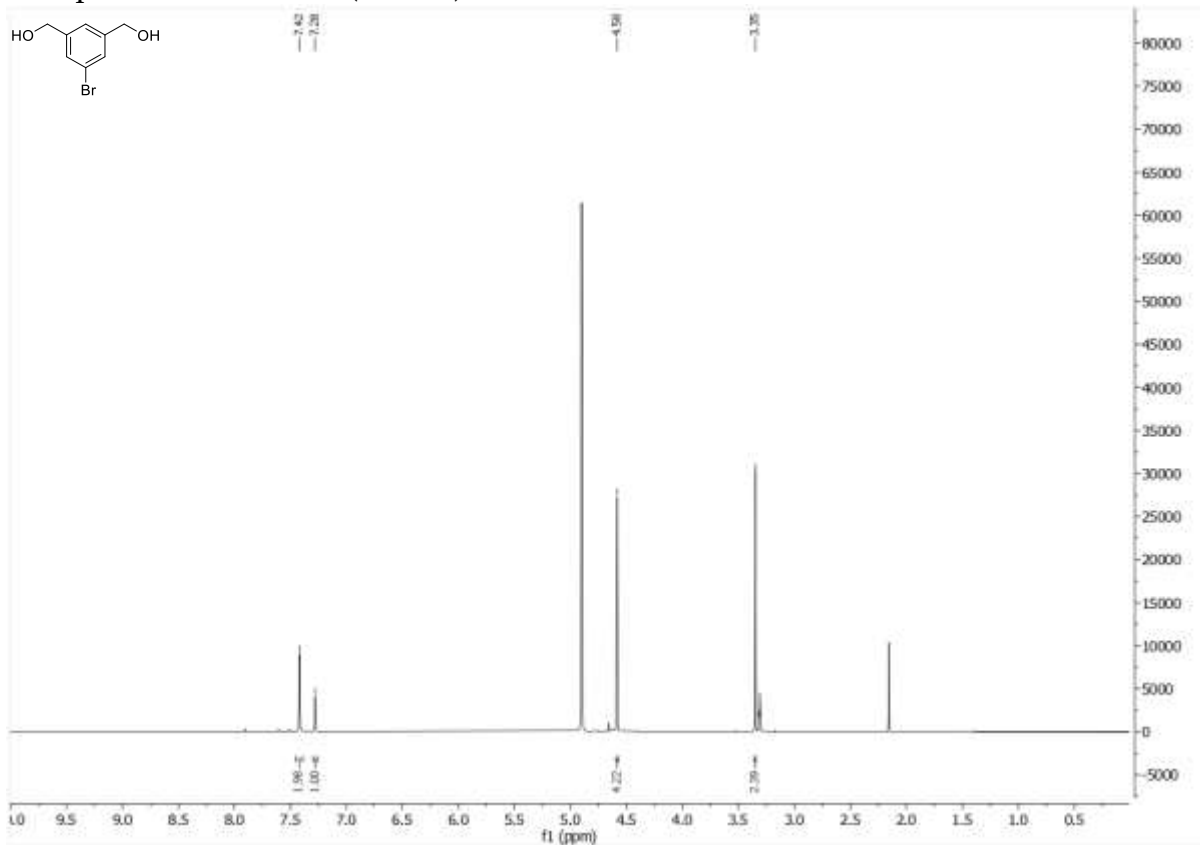

### $^{13}\text{C}$ NMR (MeOD)

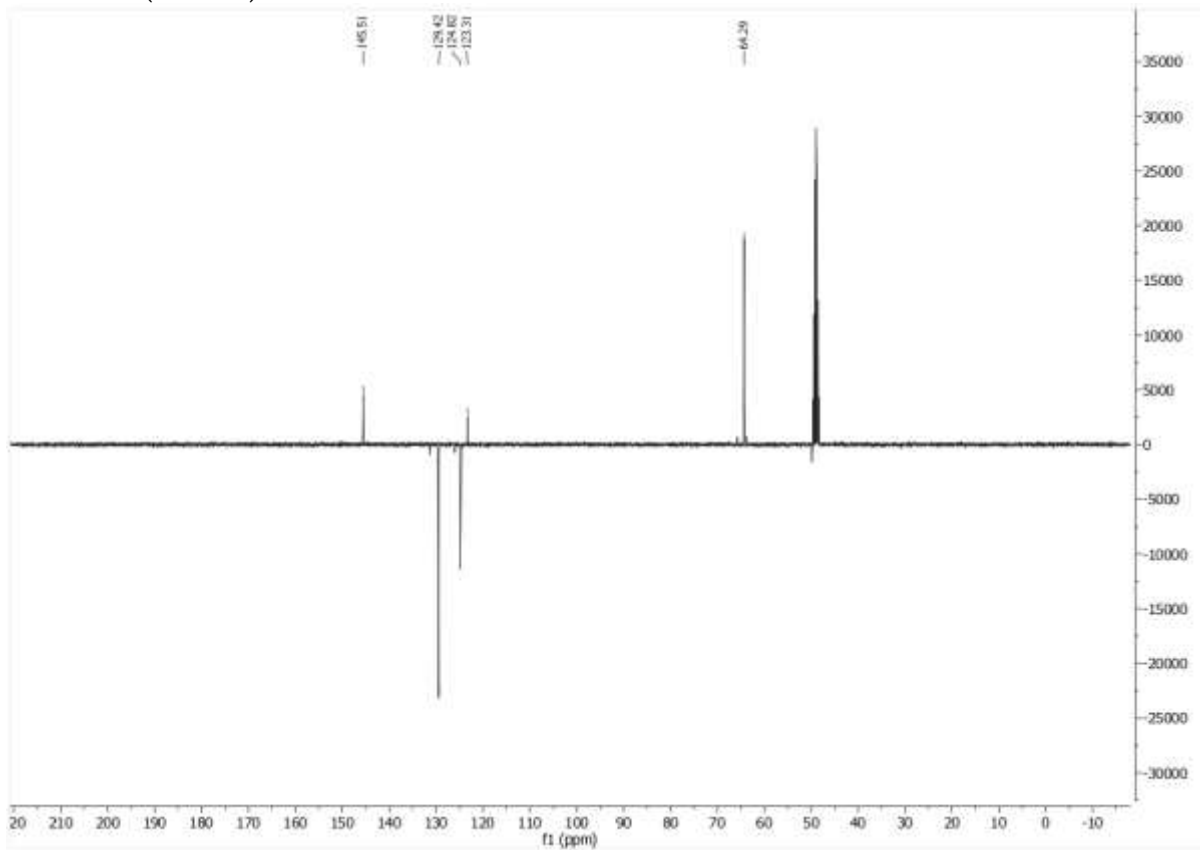

Compound **34**  $^1\text{H}$  NMR ( $\text{CDCl}_3$ )

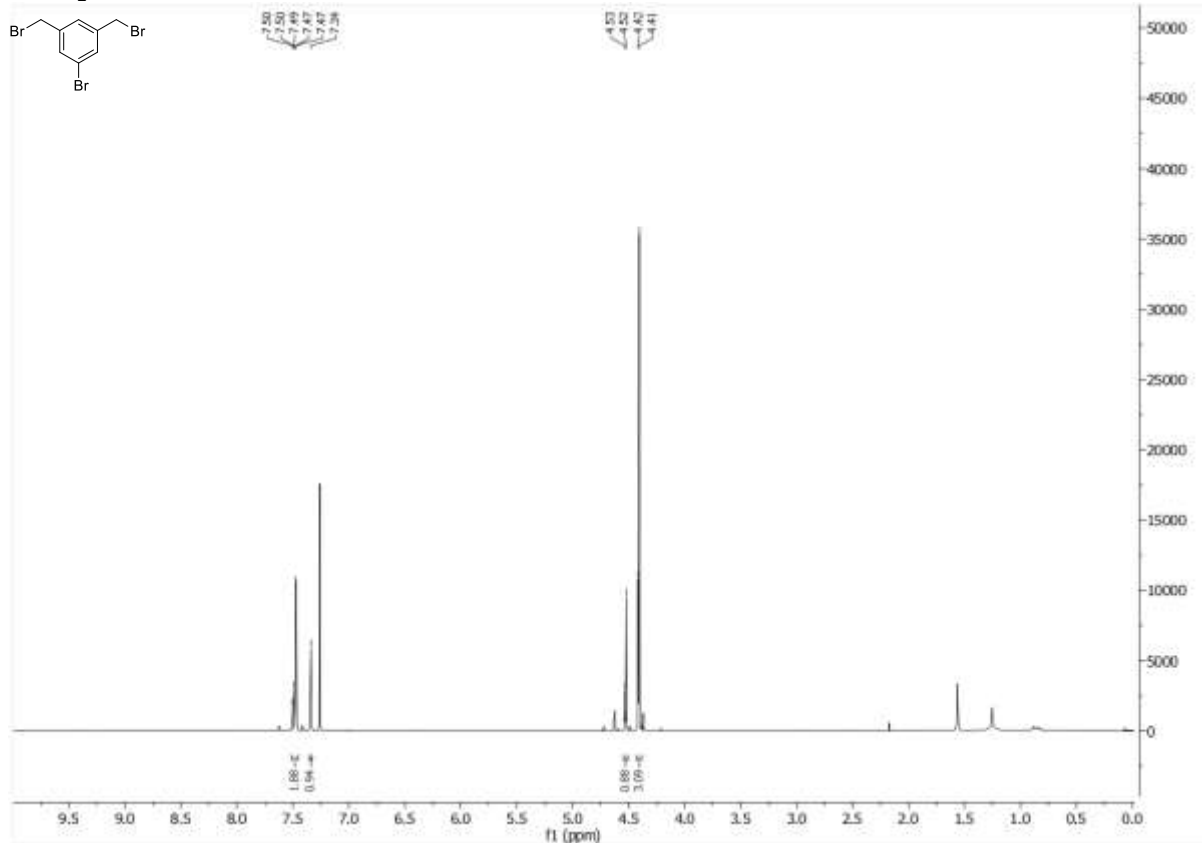

$^{13}\text{C}$  NMR ( $\text{CDCl}_3$ )

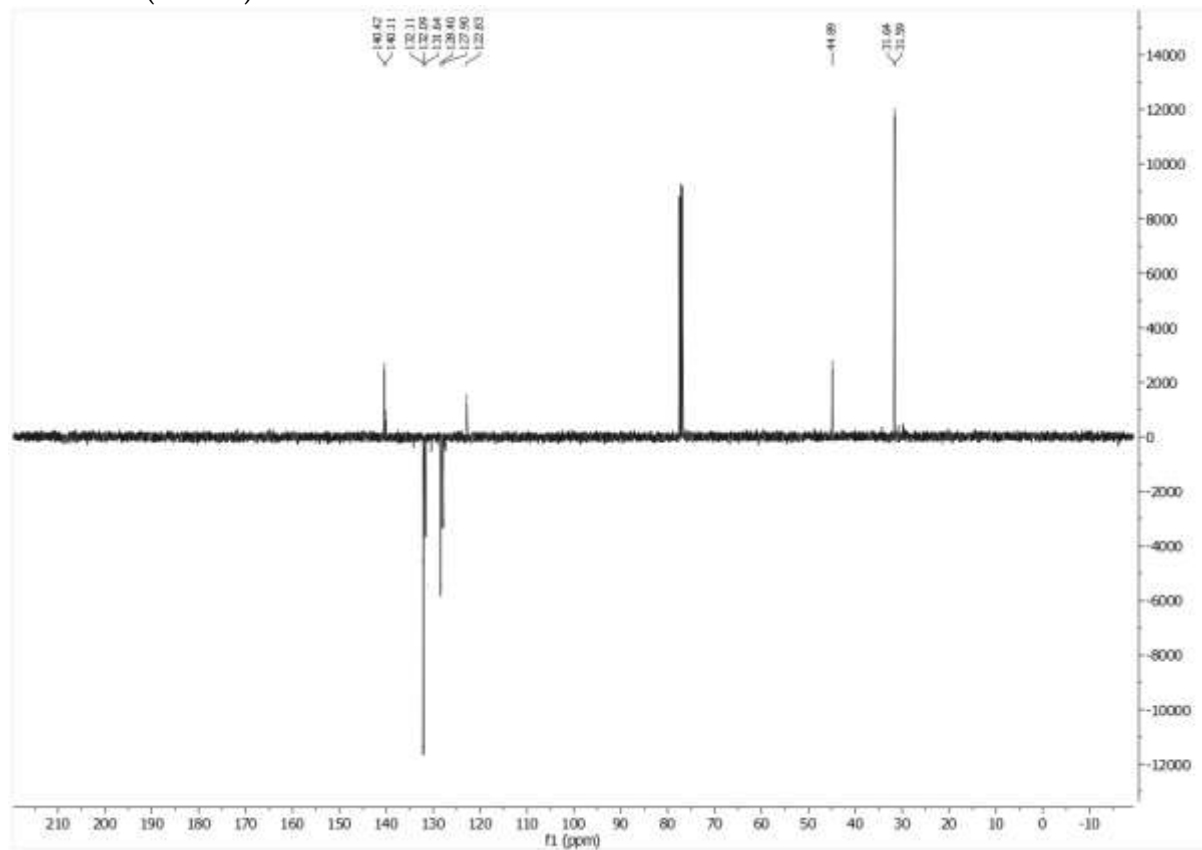

Compound **35**  $^1\text{H}$  NMR ( $\text{CDCl}_3$ )

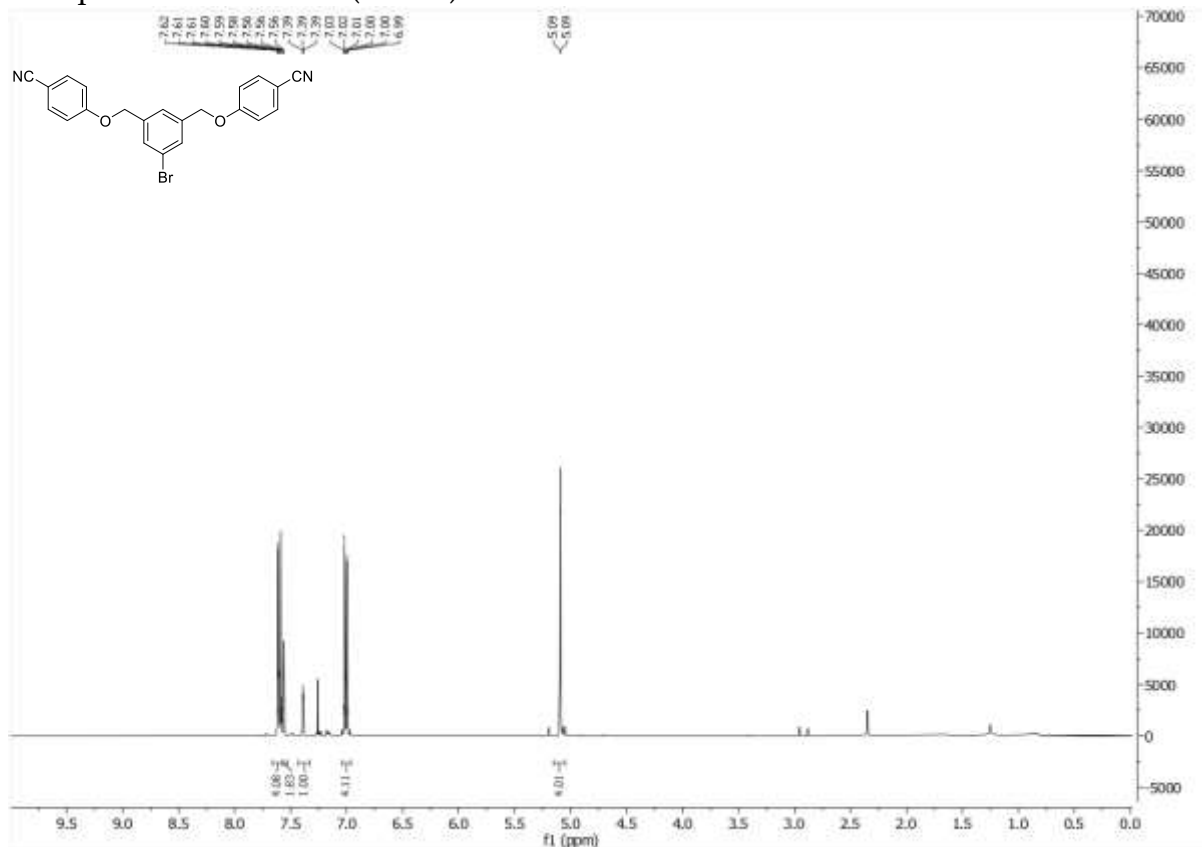

$^{13}\text{C}$  NMR ( $\text{CDCl}_3$ )

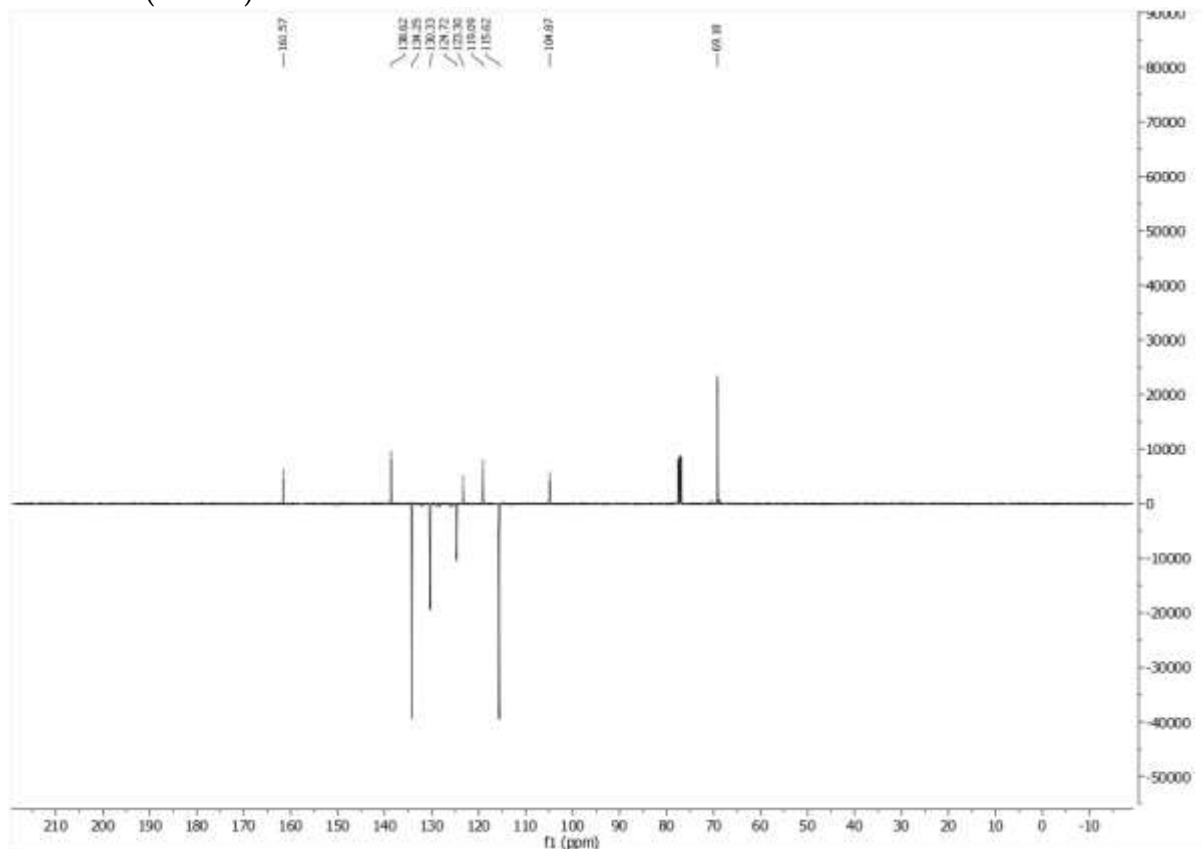

Compound **36**  $^1\text{H}$  NMR ( $\text{CDCl}_3$ )

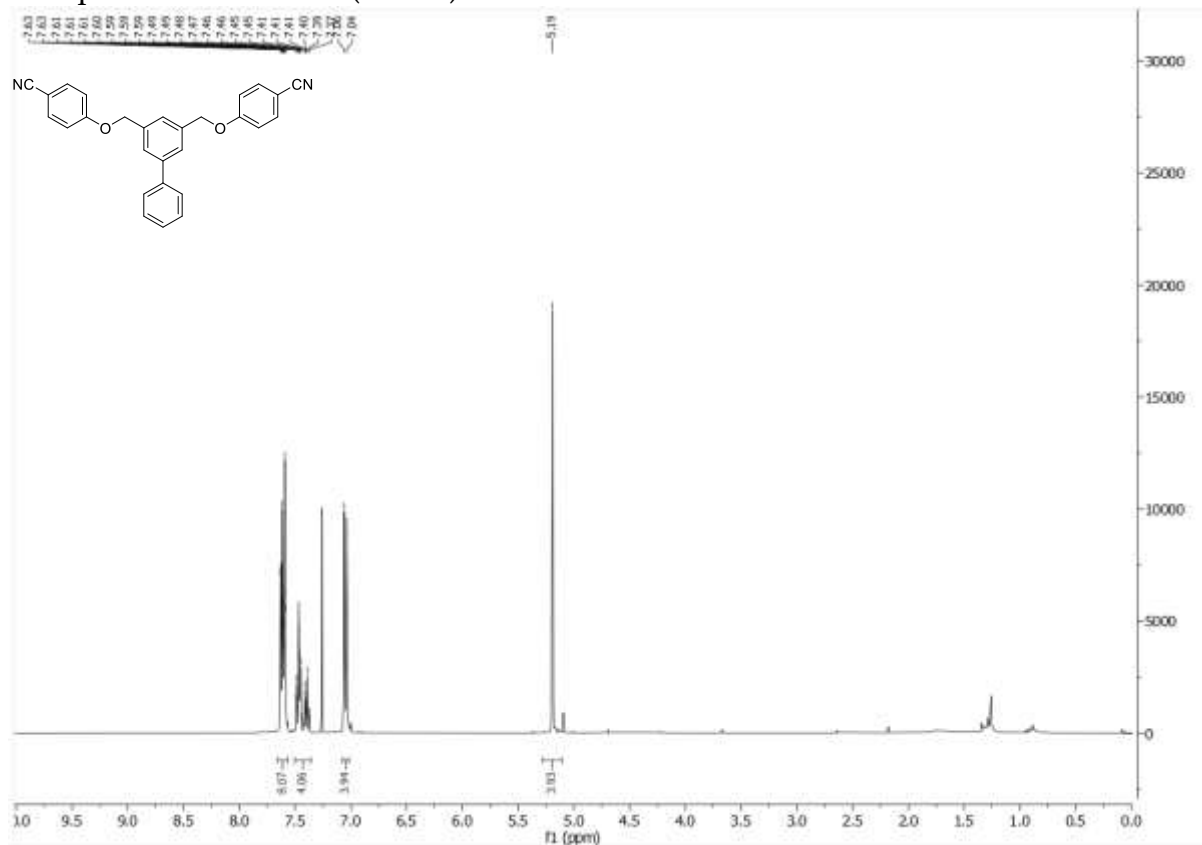

$^{13}\text{C}$  NMR ( $\text{CDCl}_3$ )

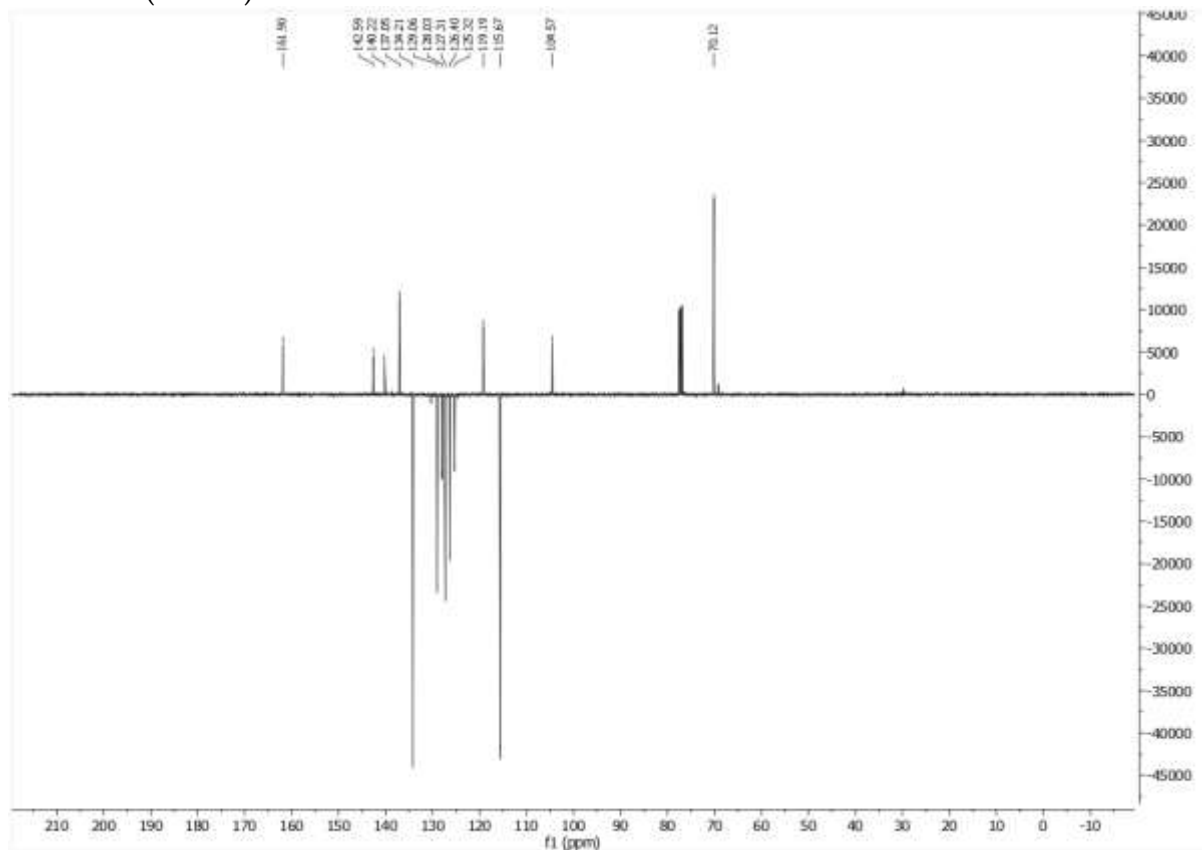

### Compound 37 <sup>1</sup>H NMR (DMSO)

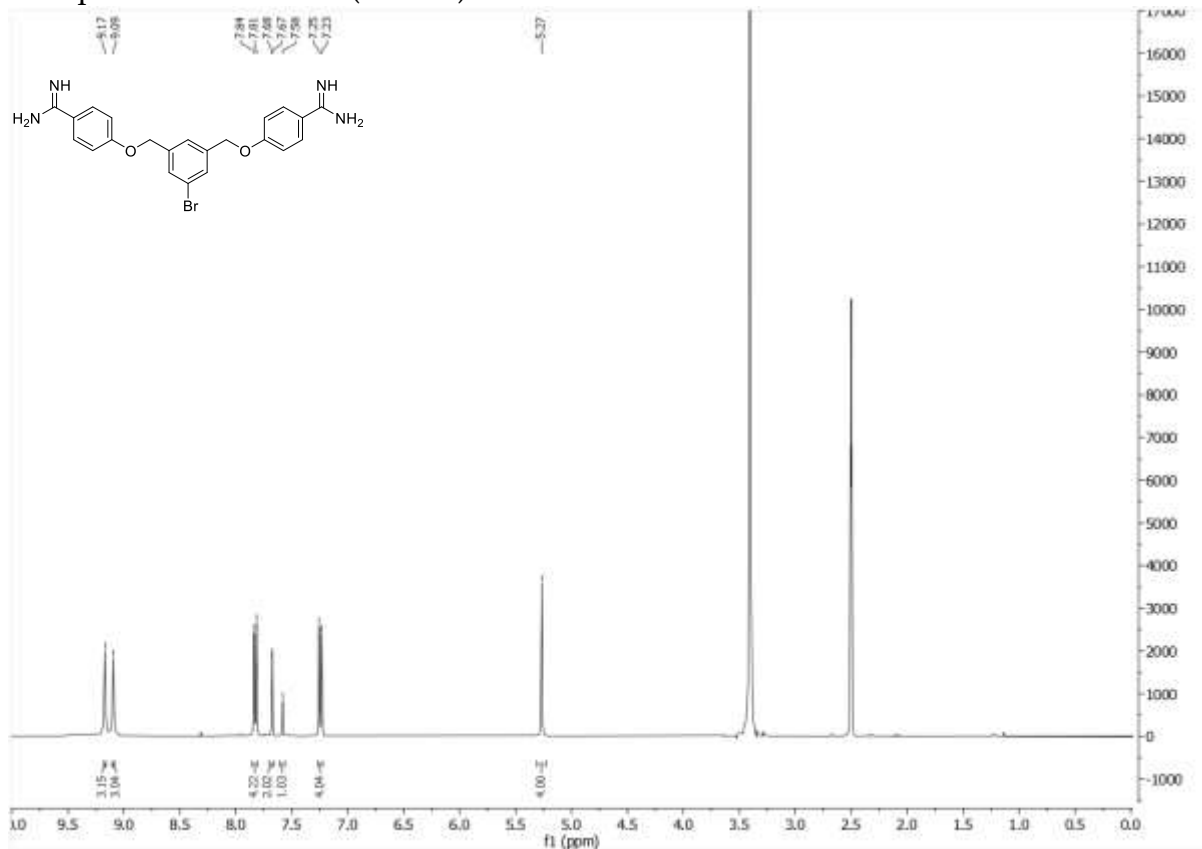

### <sup>13</sup>C NMR (DMSO)

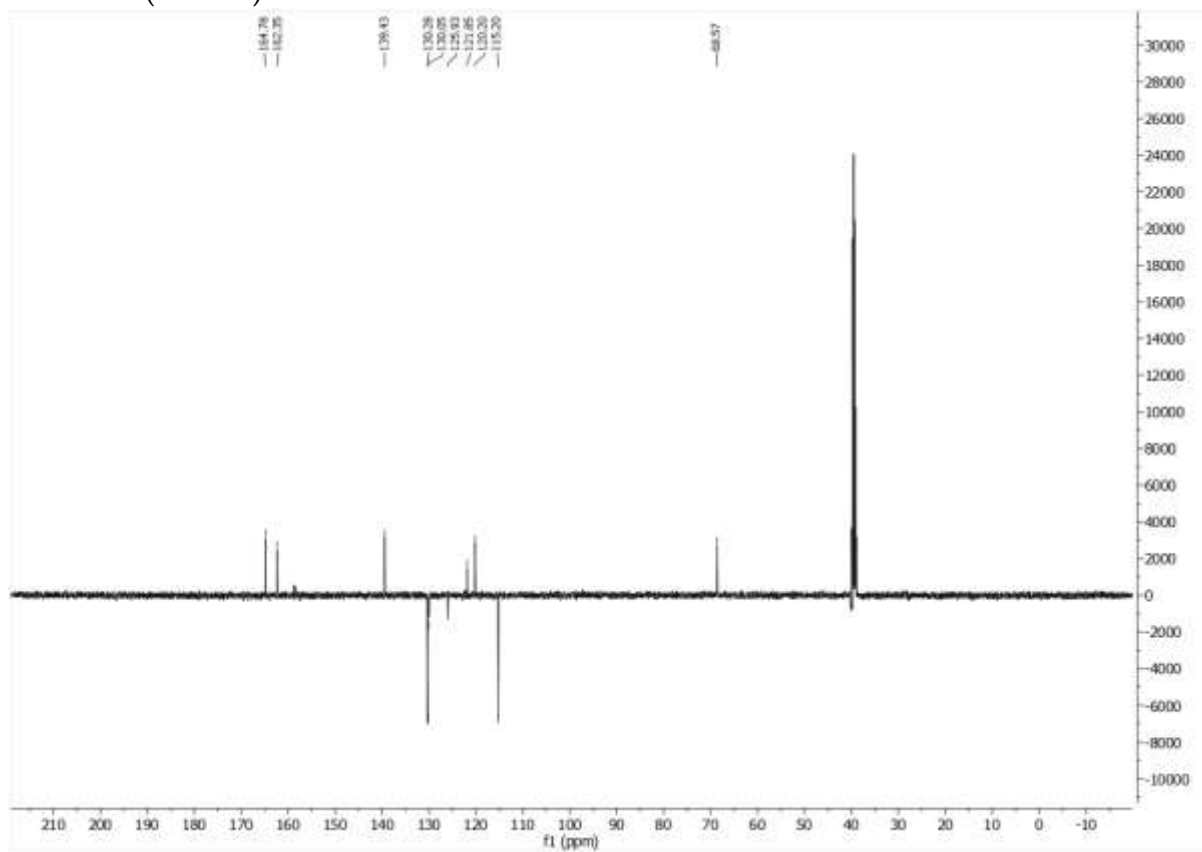

### Compound 38 <sup>1</sup>H NMR (DMSO)

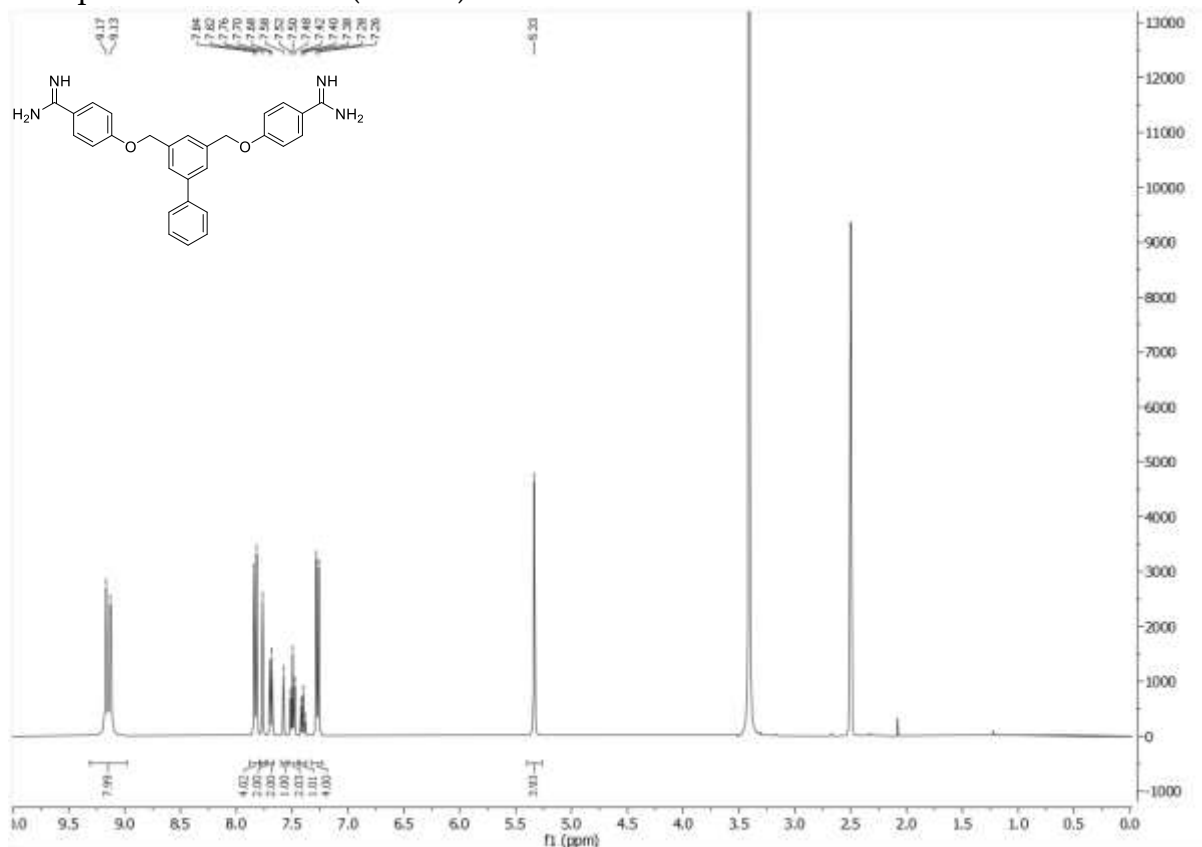

### <sup>13</sup>C NMR (DMSO)

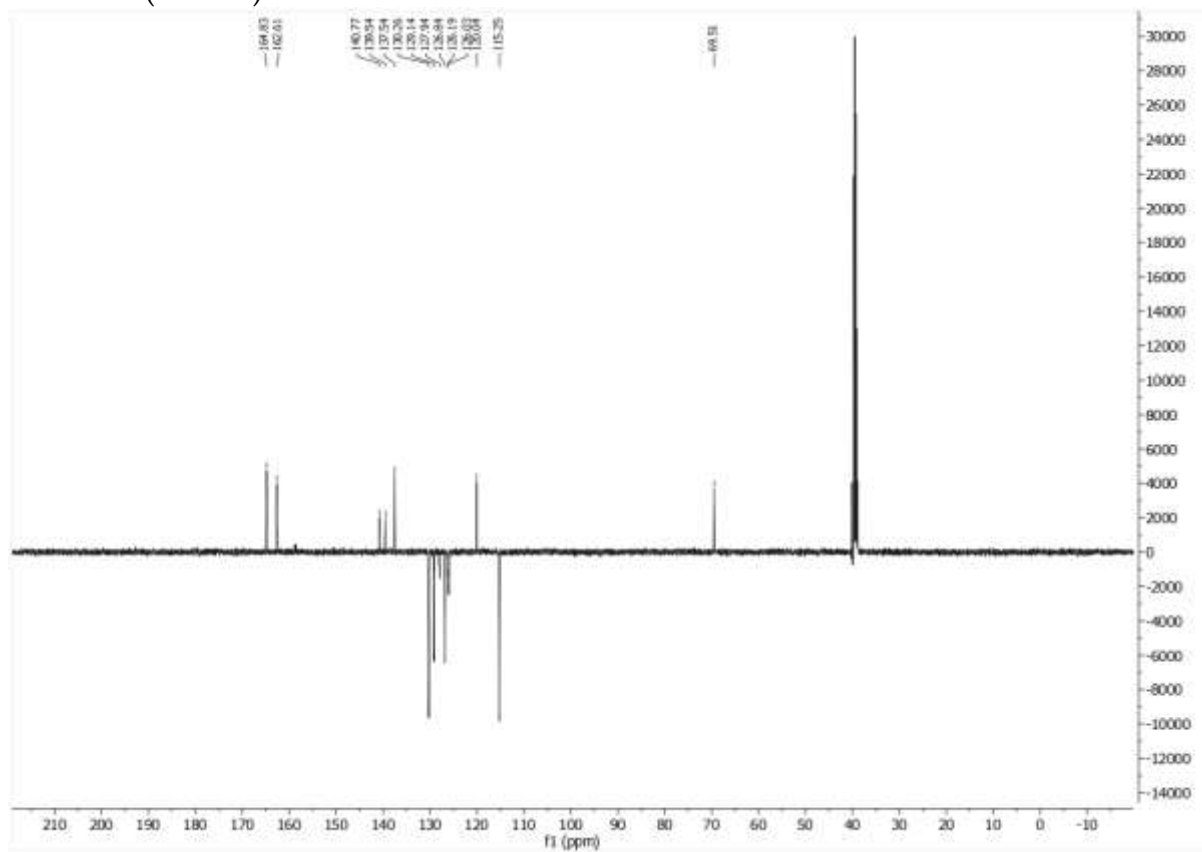



Compound **39**  $^1\text{H}$  NMR ( $\text{CDCl}_3$ )

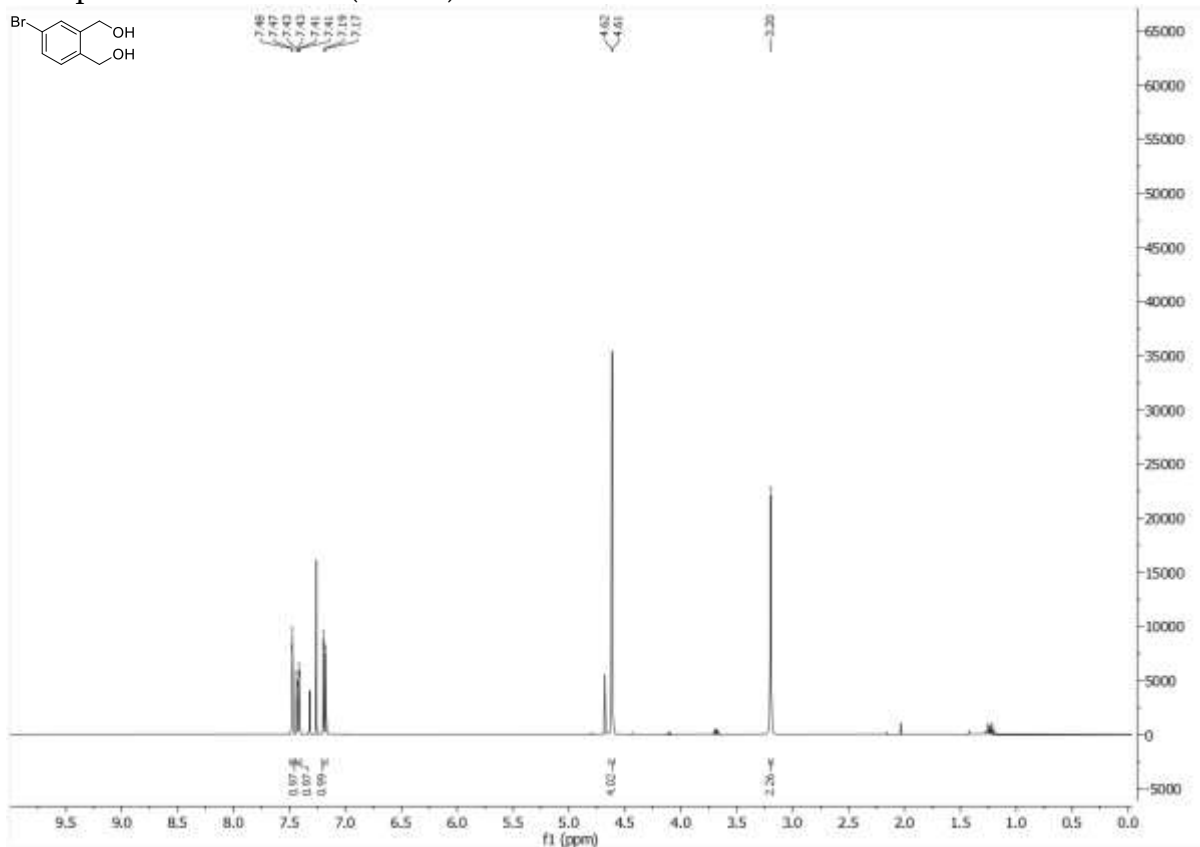

$^{13}\text{C}$  NMR ( $\text{CDCl}_3$ )

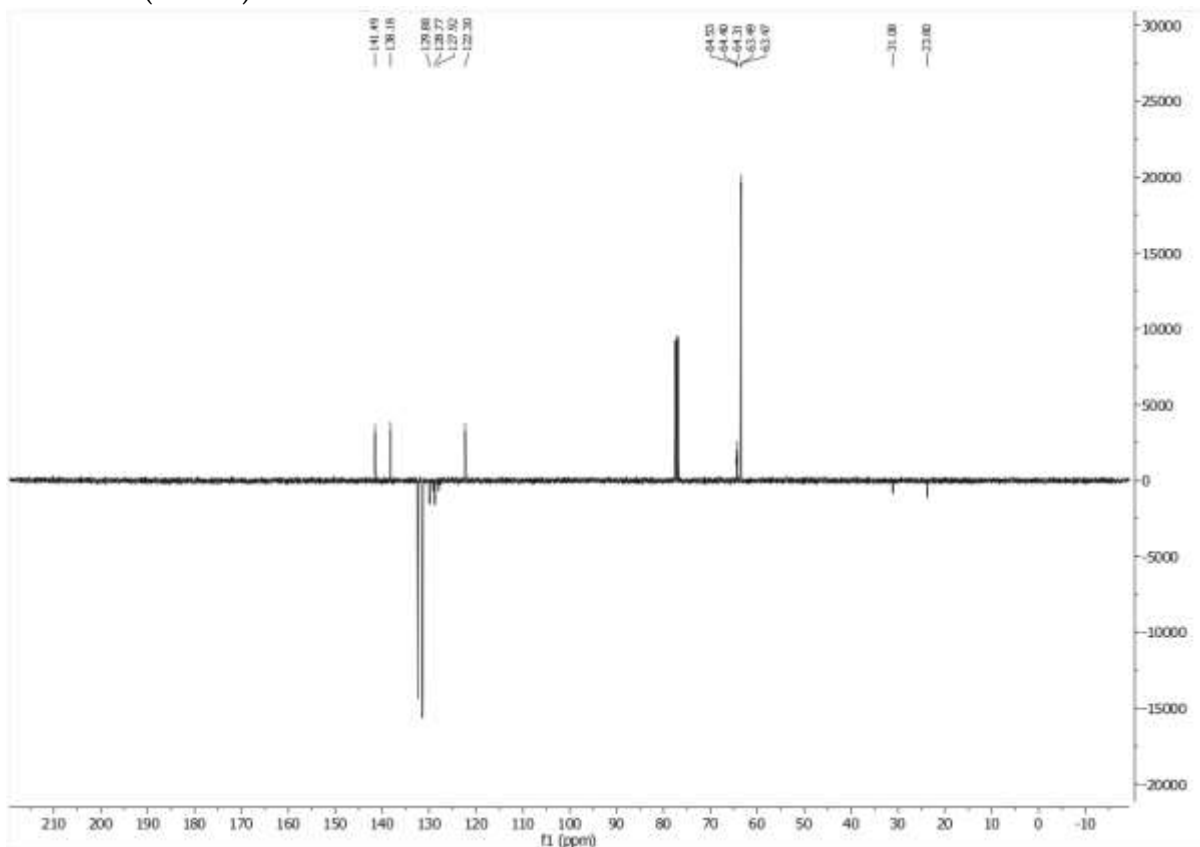

Compound **40**  $^1\text{H}$  NMR ( $\text{CDCl}_3$ )

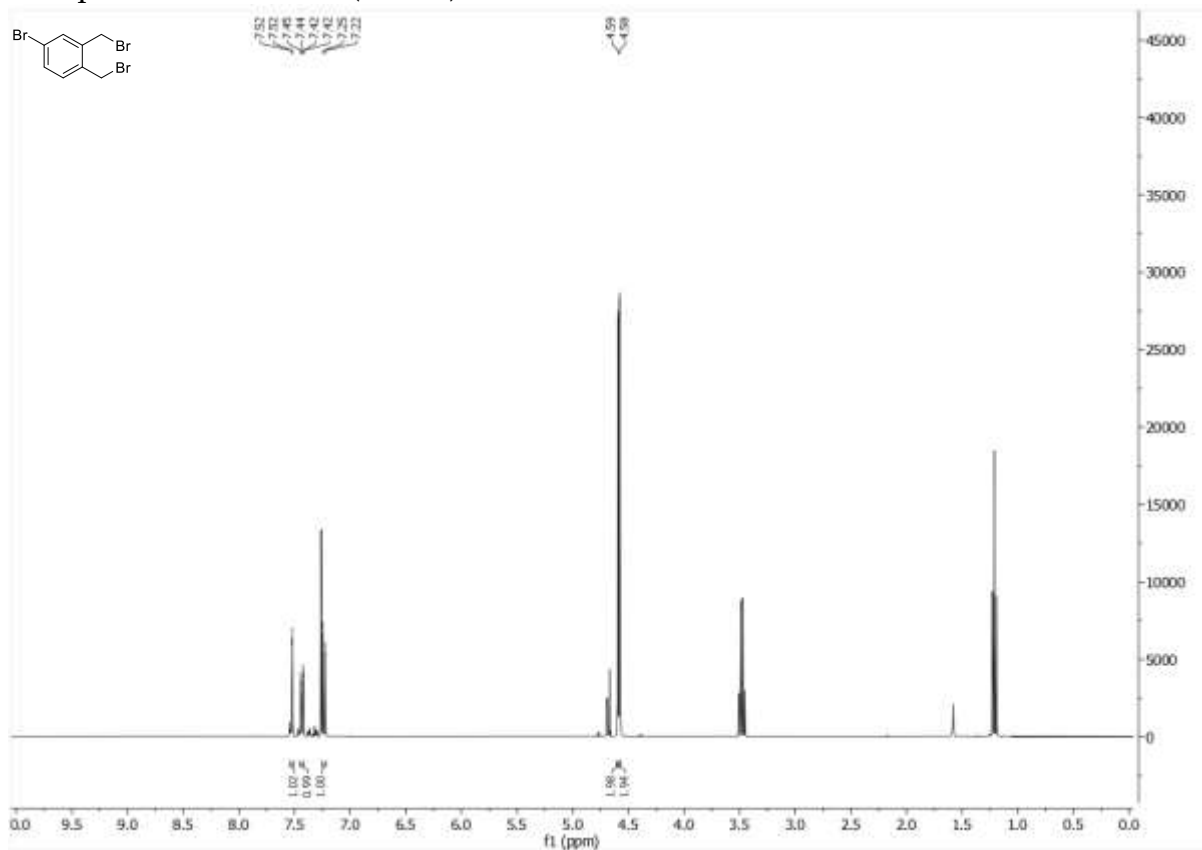

$^{13}\text{C}$  NMR ( $\text{CDCl}_3$ )

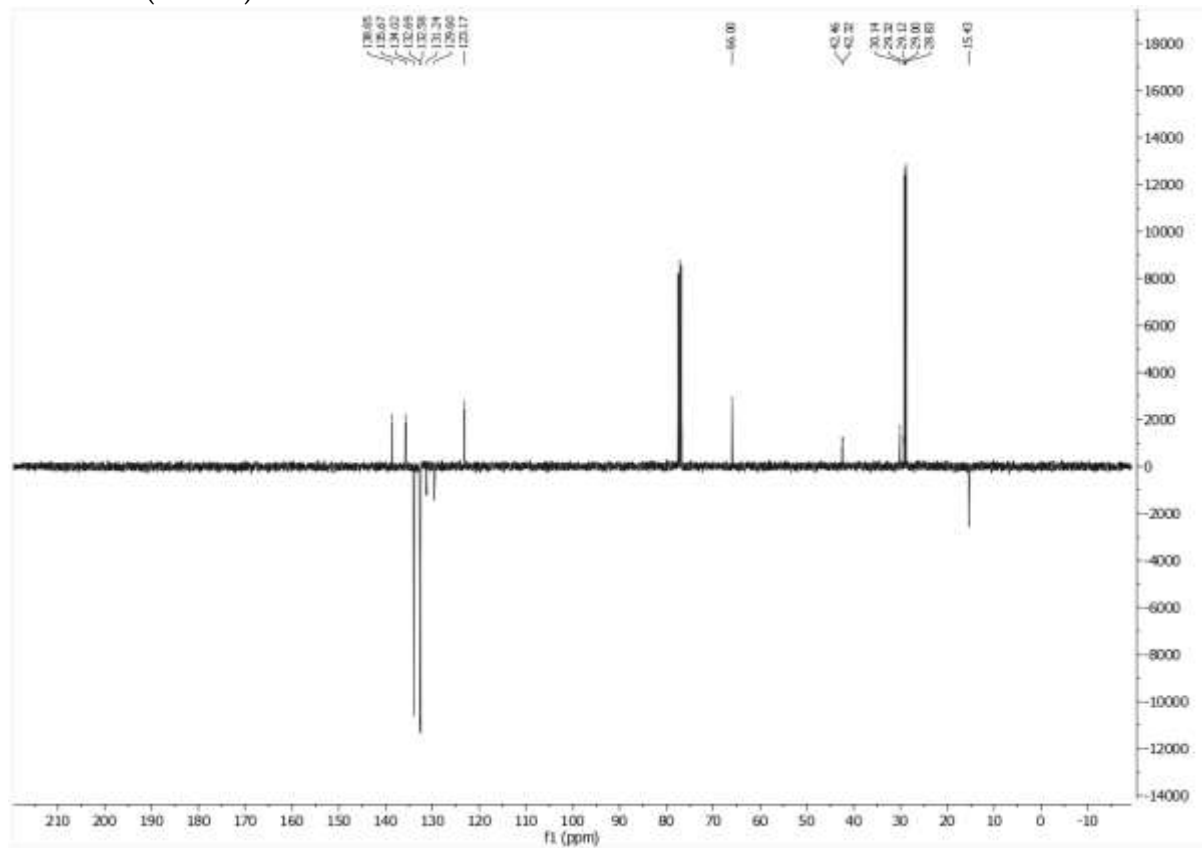

Compound **41**  $^1\text{H}$  NMR ( $\text{CDCl}_3$ )

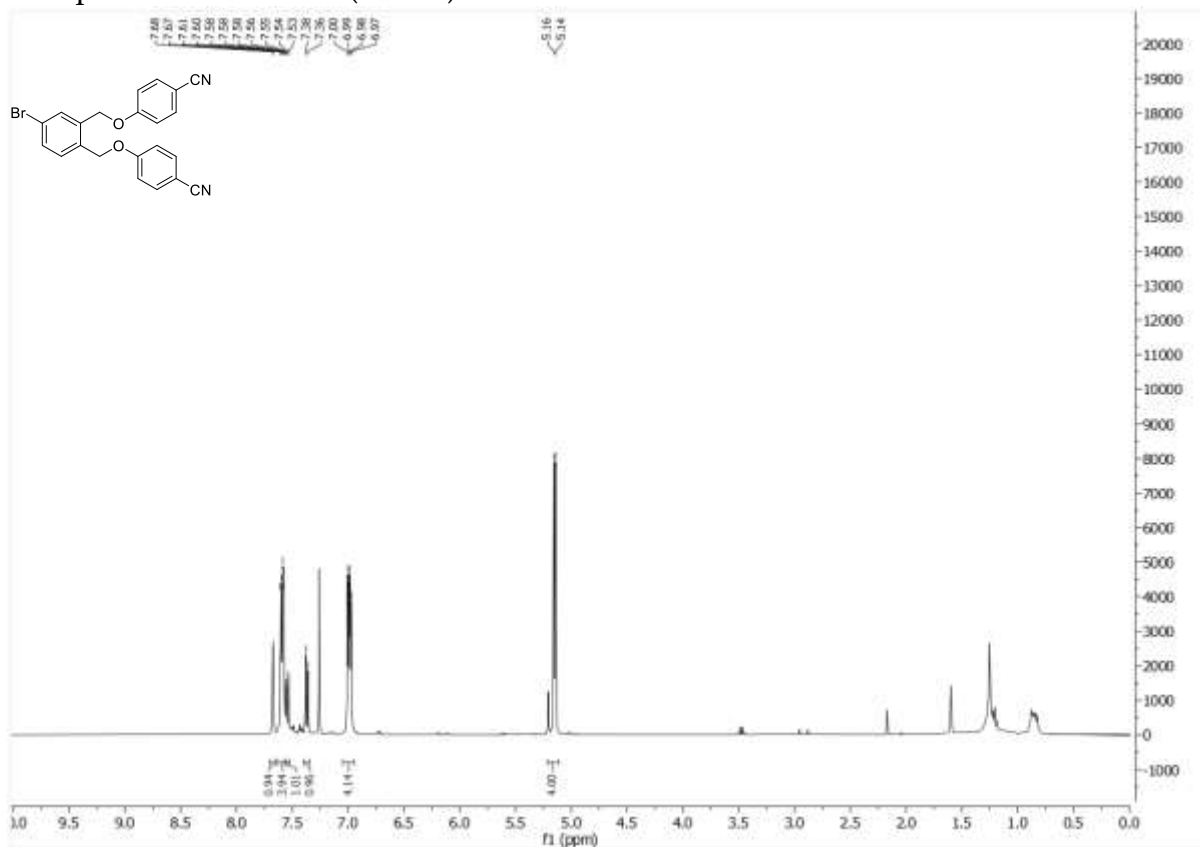

$^{13}\text{C}$  NMR ( $\text{CDCl}_3$ )

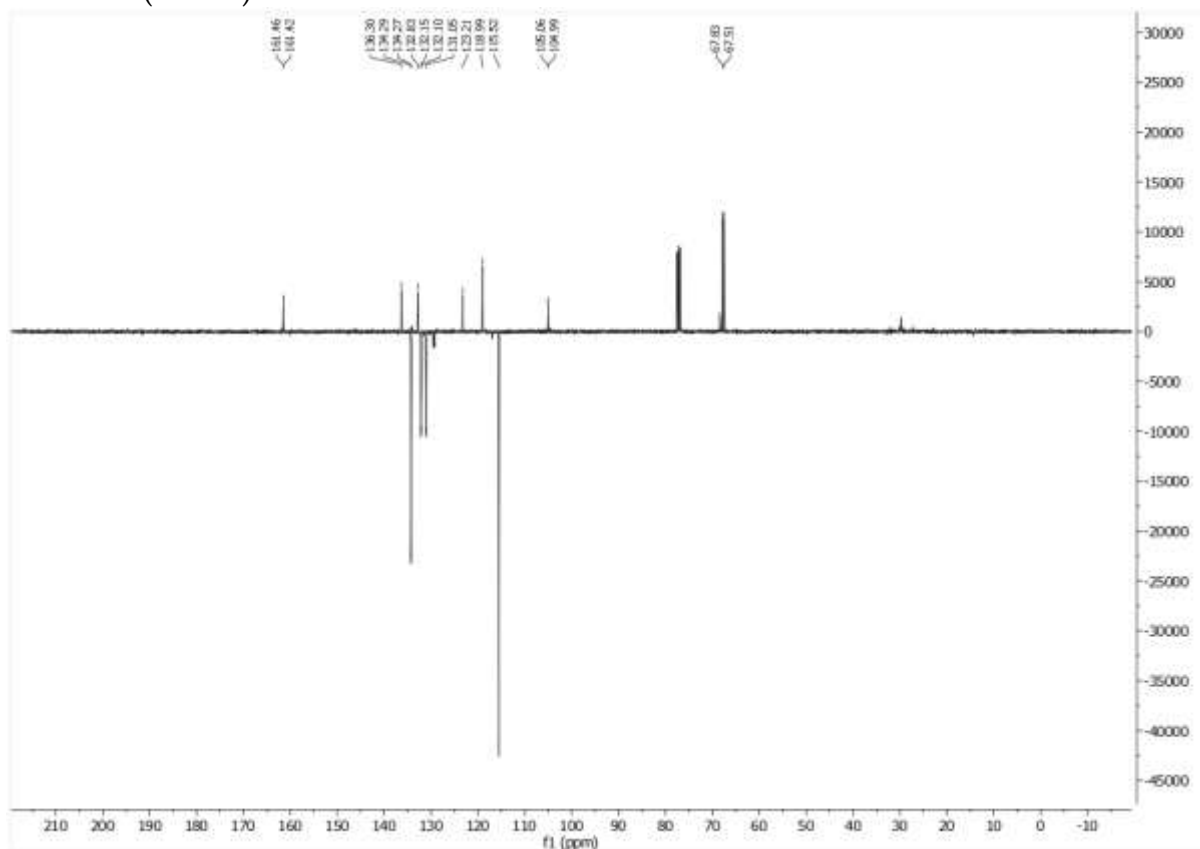

Compound **42**  $^1\text{H}$  NMR ( $\text{CDCl}_3$ )

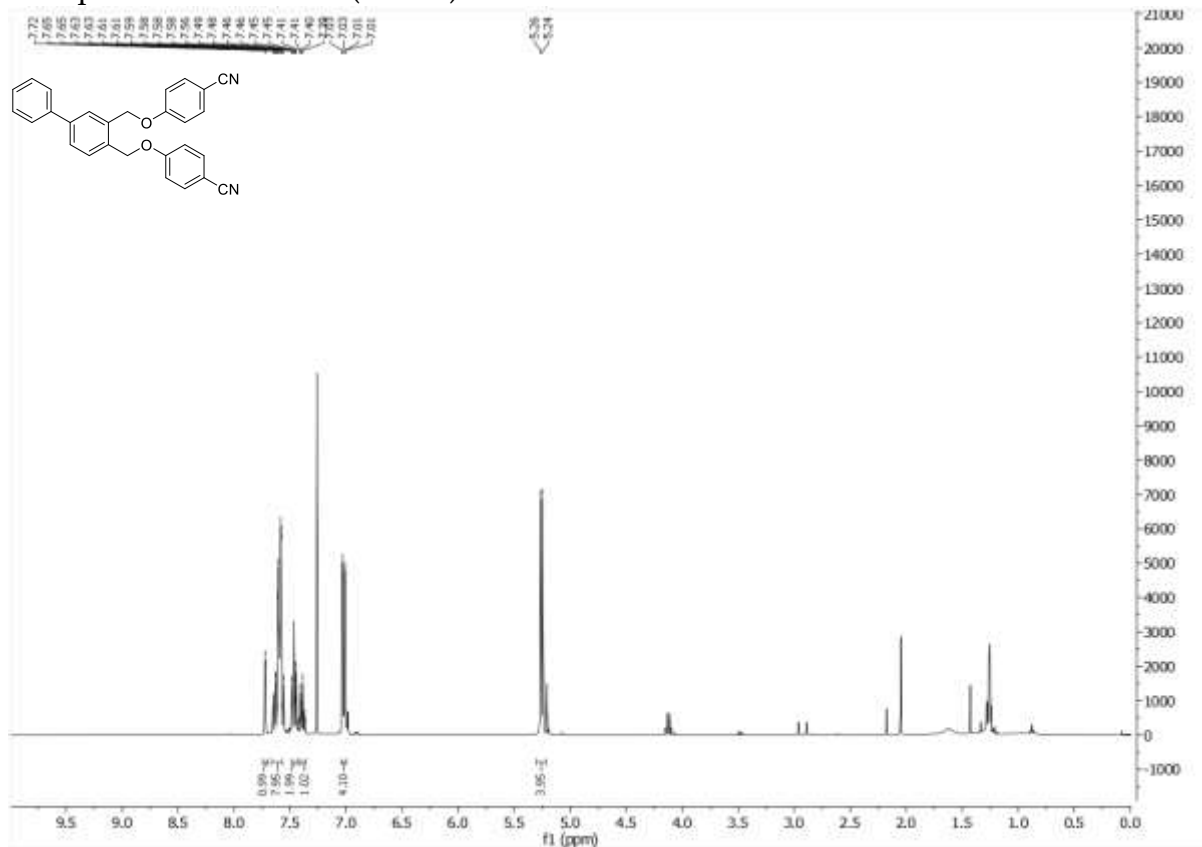

$^{13}\text{C}$  NMR ( $\text{CDCl}_3$ )

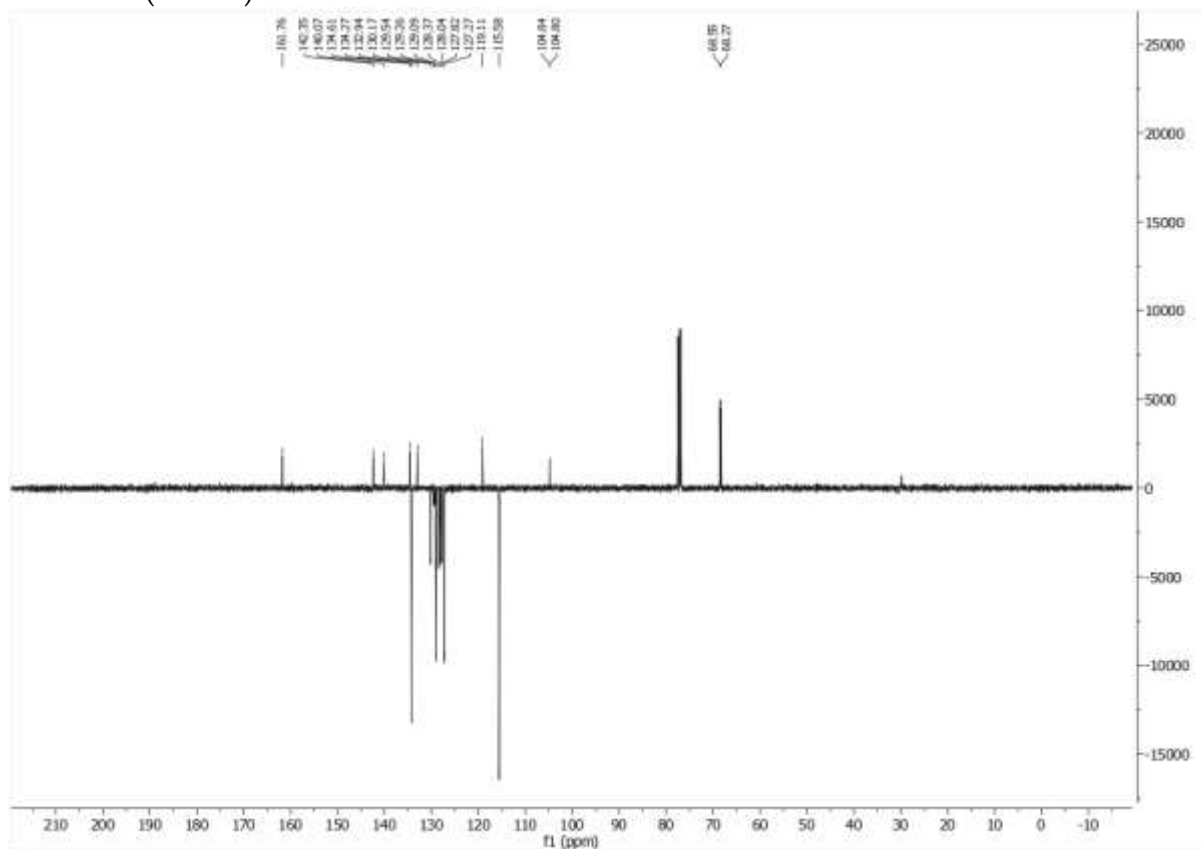

Compound **43**  $^1\text{H}$  NMR (DMSO)

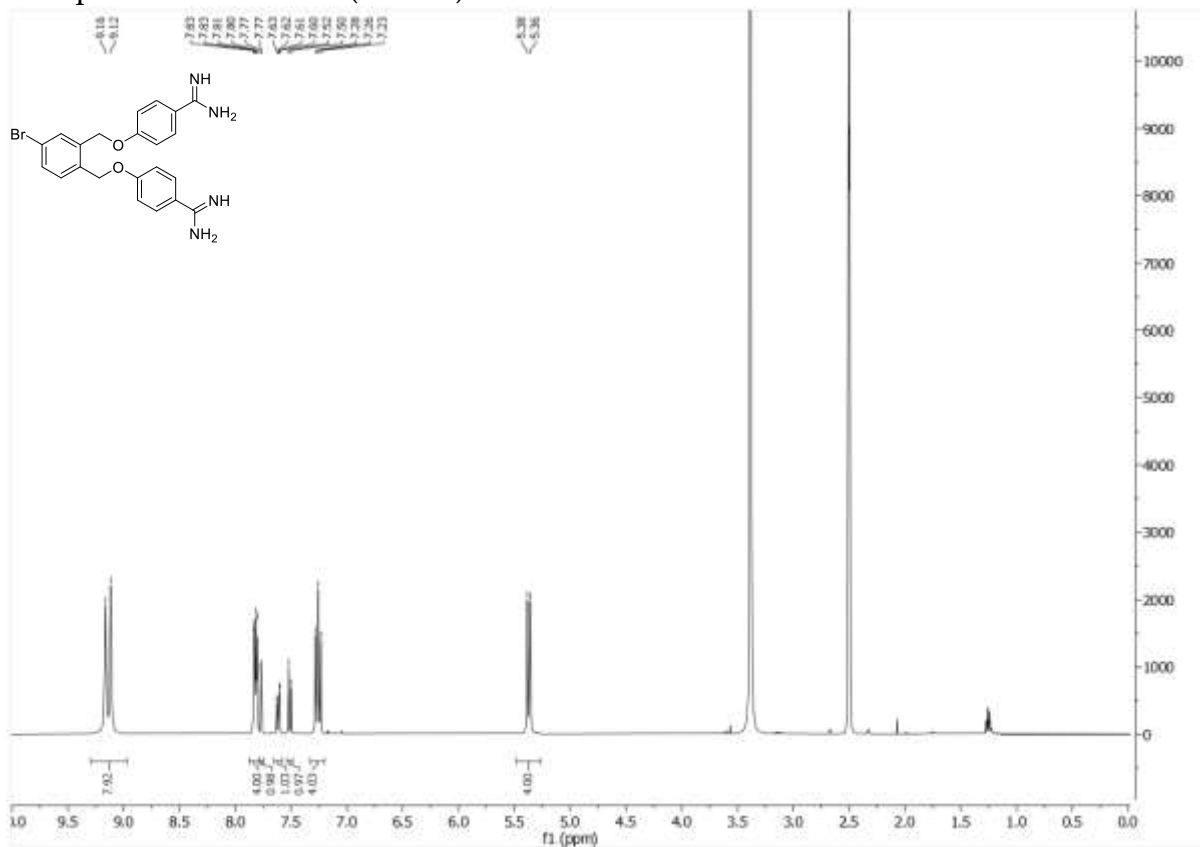

$^{13}\text{C}$  NMR (DMSO)

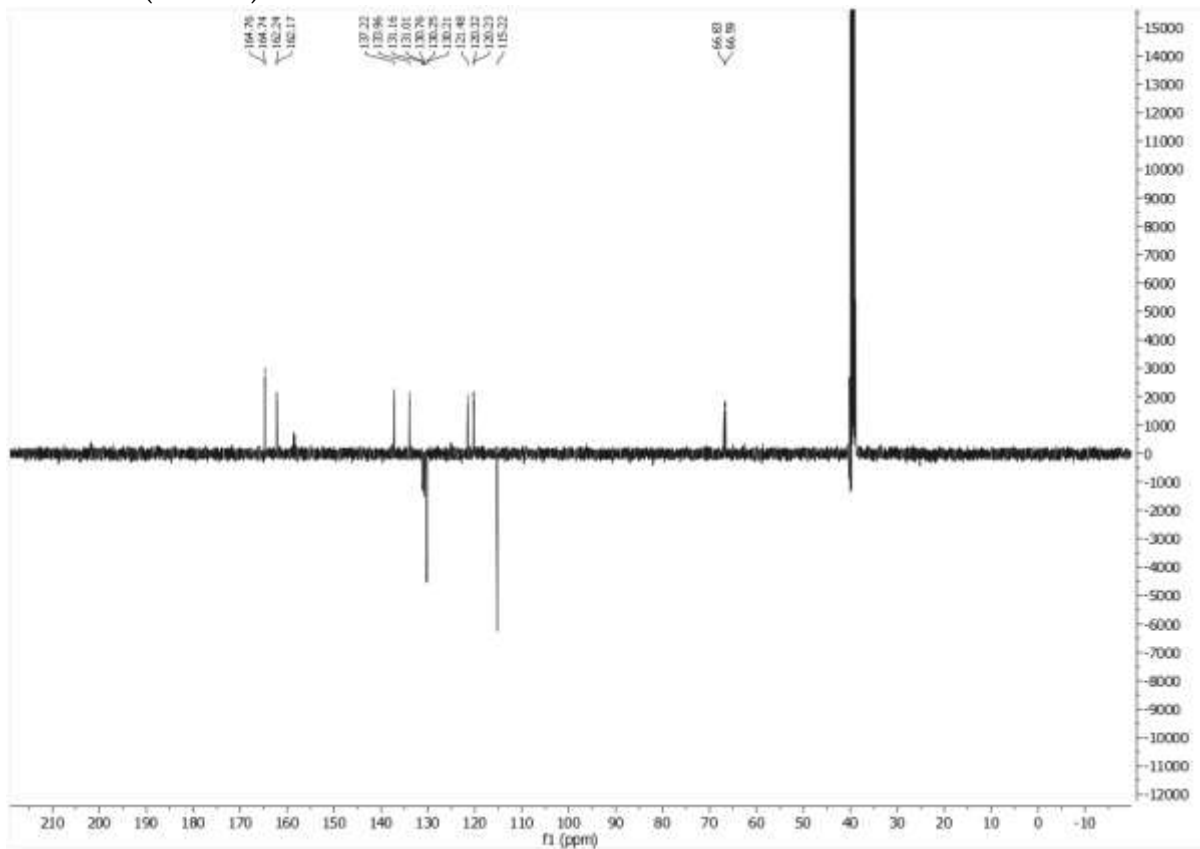

Compound **44**  $^1\text{H}$  NMR (DMSO)

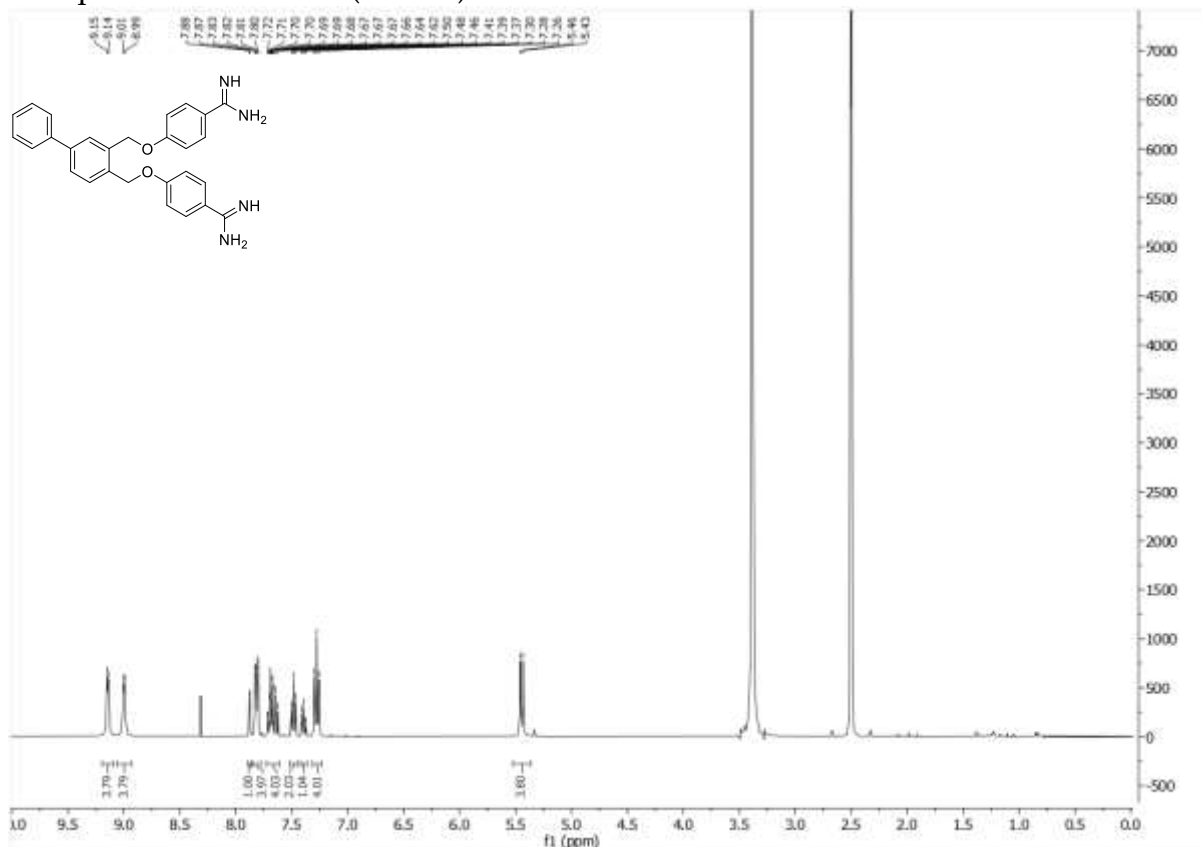

$^{13}\text{C}$  NMR (DMSO)

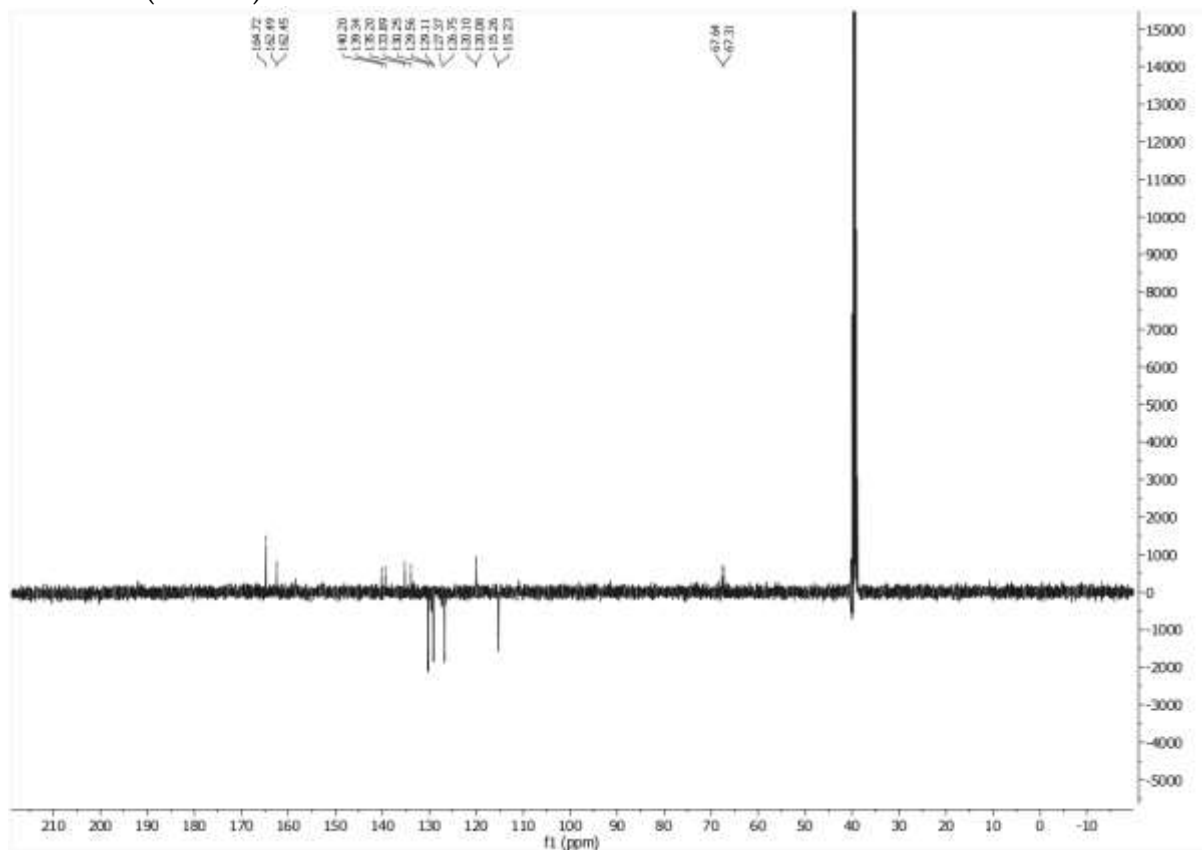

Compound **45**  $^1\text{H}$  NMR ( $\text{CDCl}_3$ )

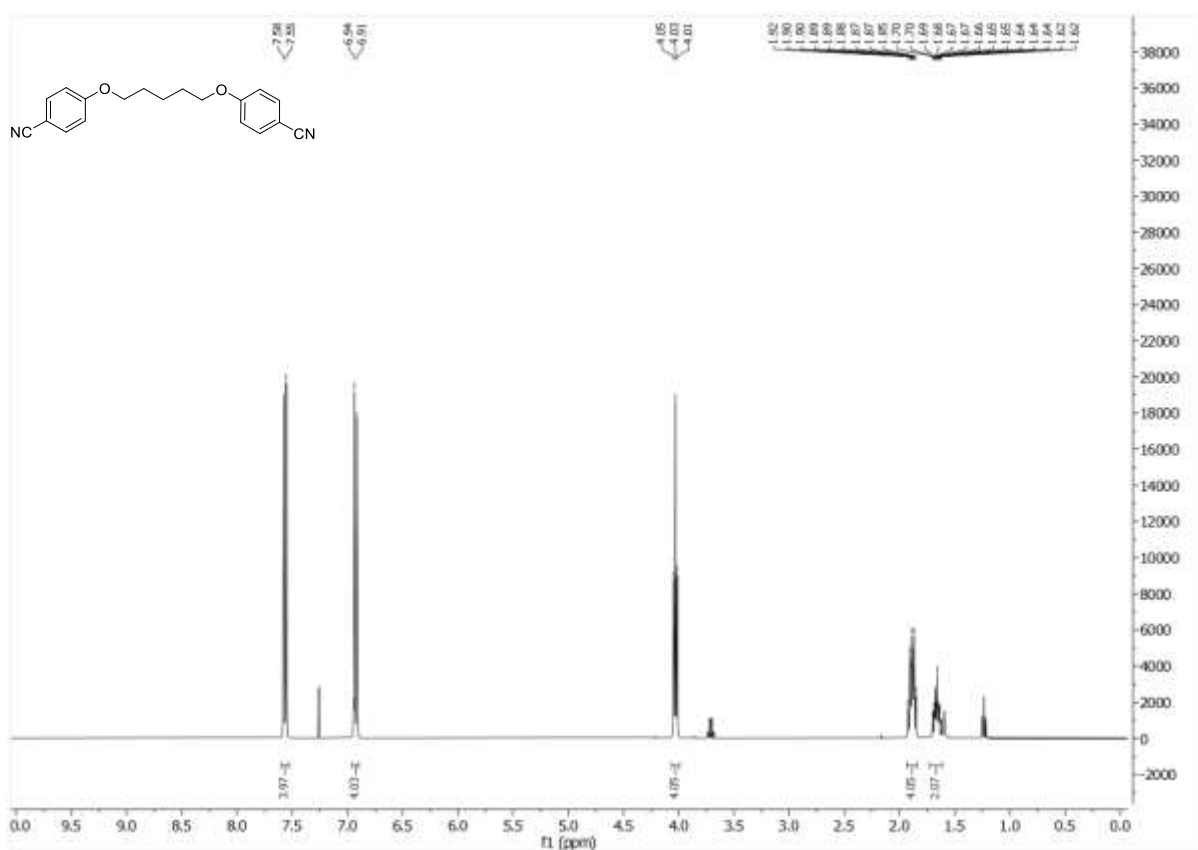

$^{13}\text{C}$  NMR ( $\text{CDCl}_3$ )

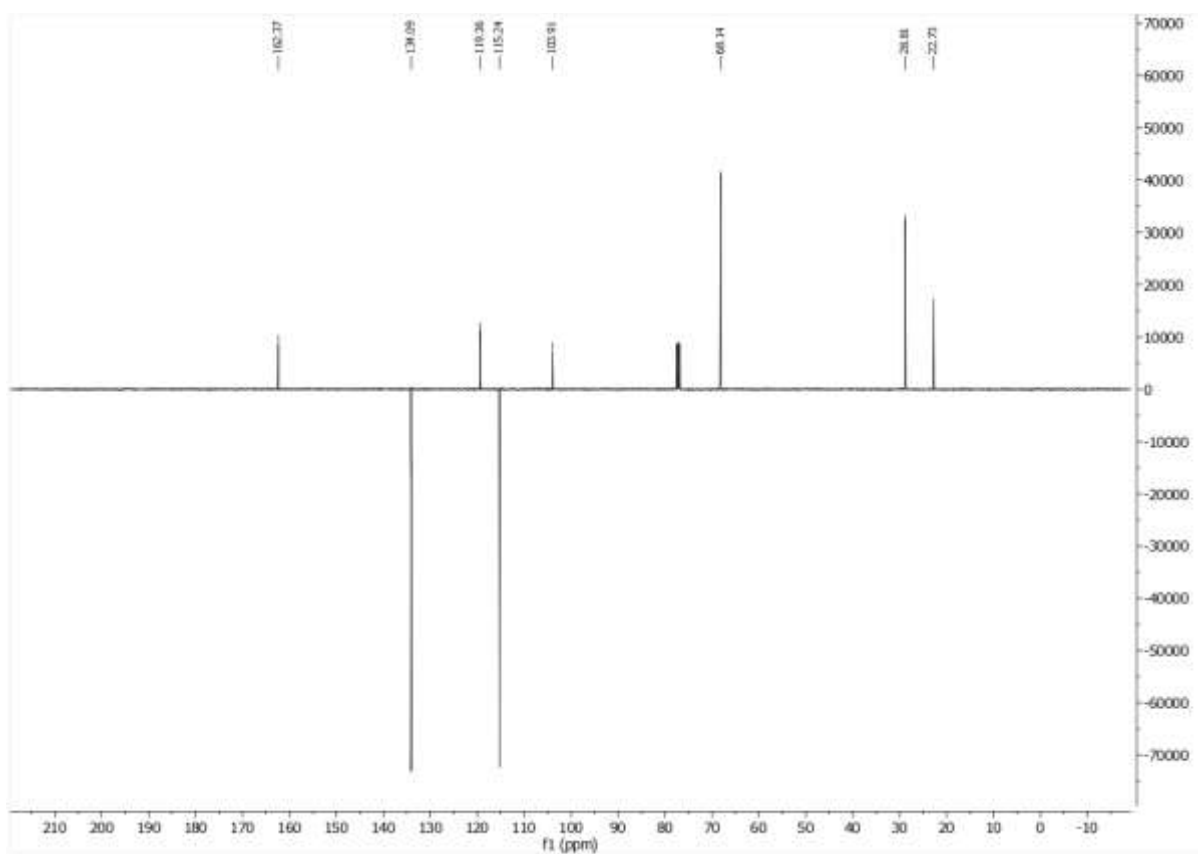

Compound **46**  $^1\text{H}$  NMR ( $\text{CDCl}_3$ )

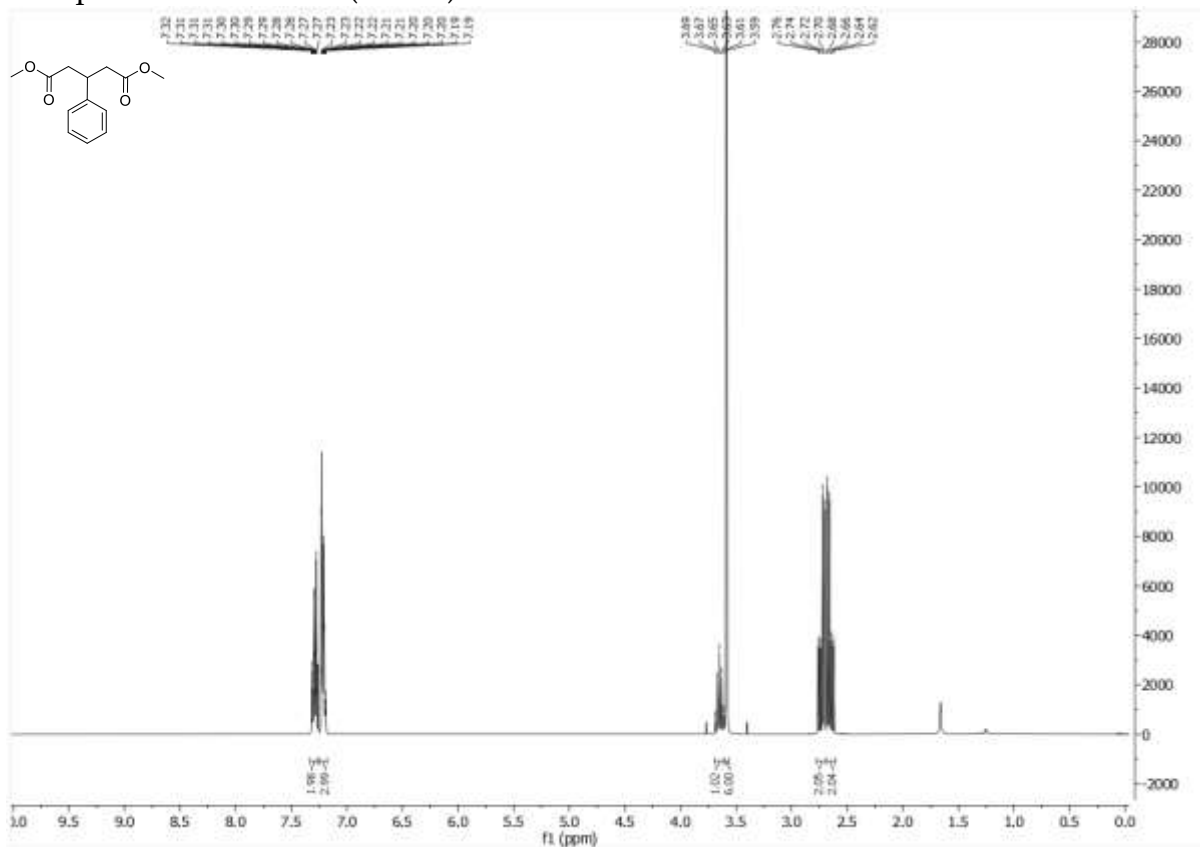

$^{13}\text{C}$  NMR ( $\text{CDCl}_3$ )

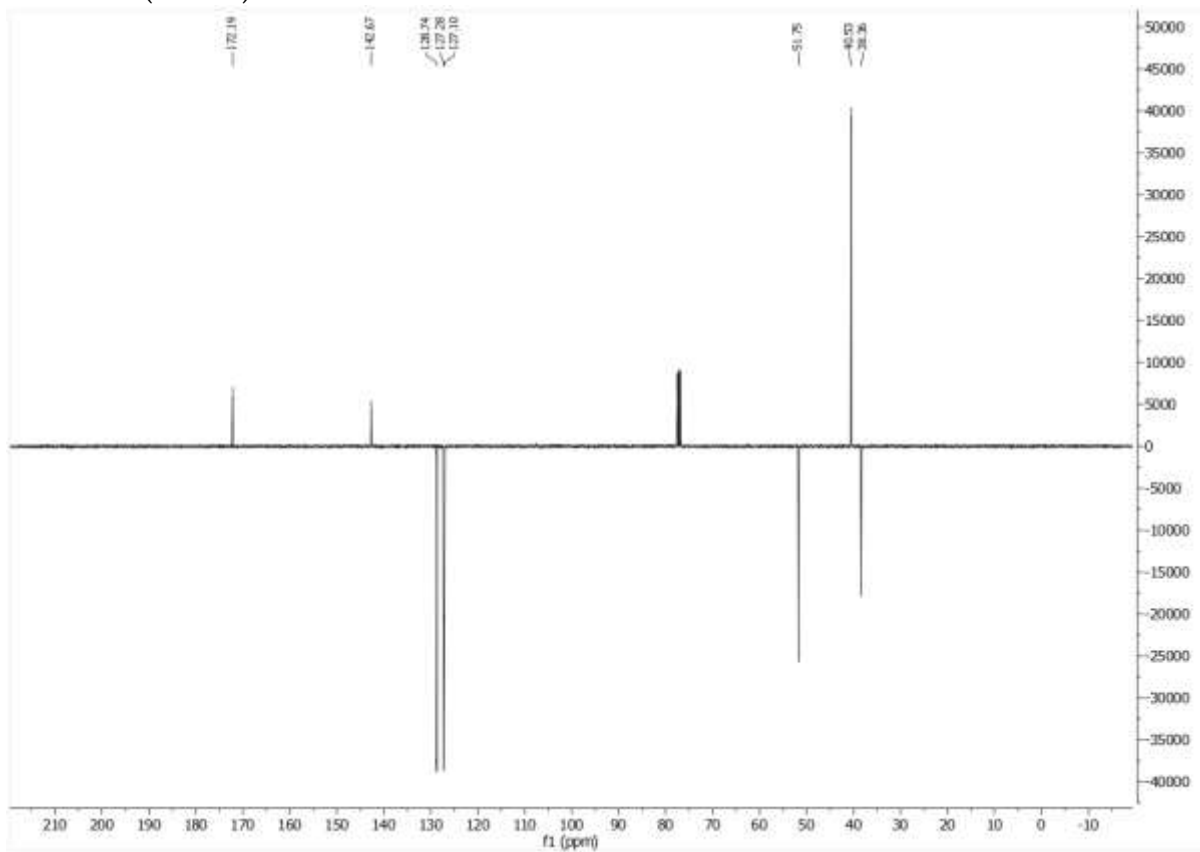



Compound **47**  $^1\text{H}$  NMR ( $\text{CDCl}_3$ )

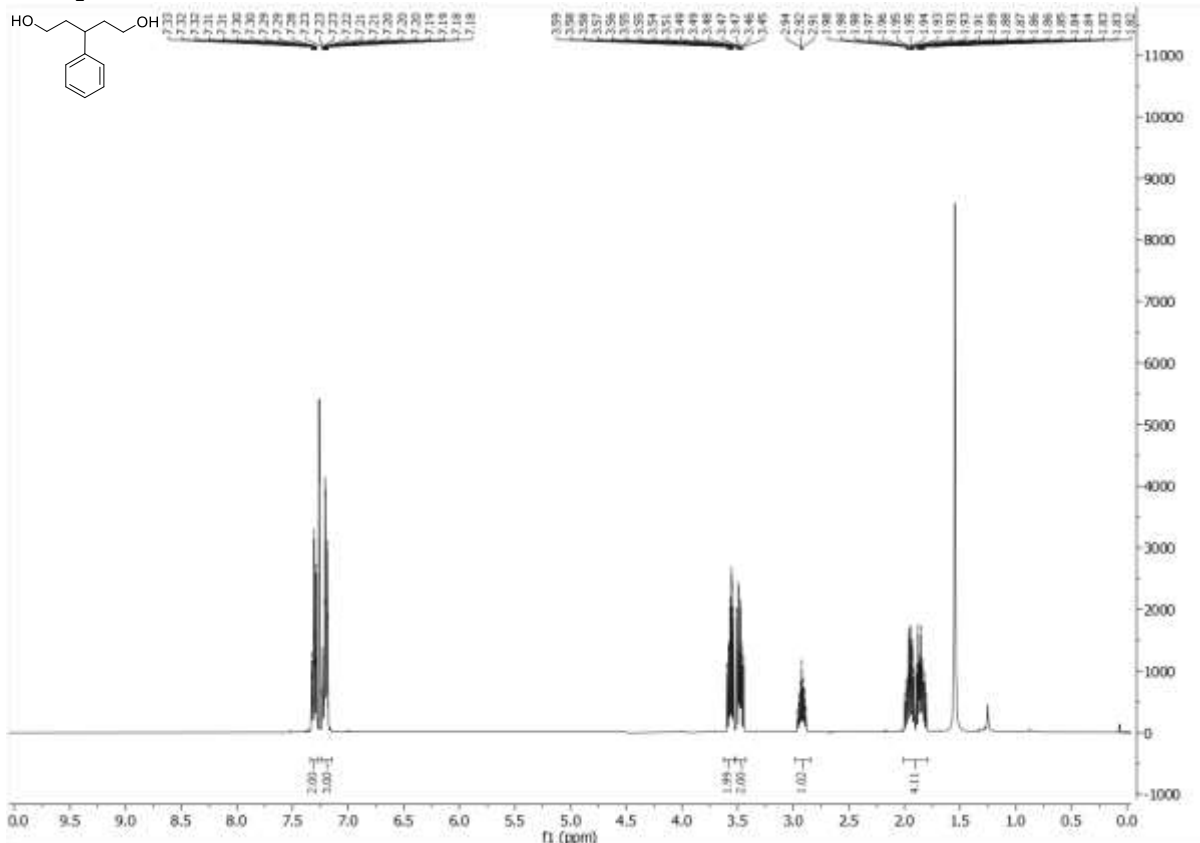

$^{13}\text{C}$  NMR ( $\text{CDCl}_3$ )

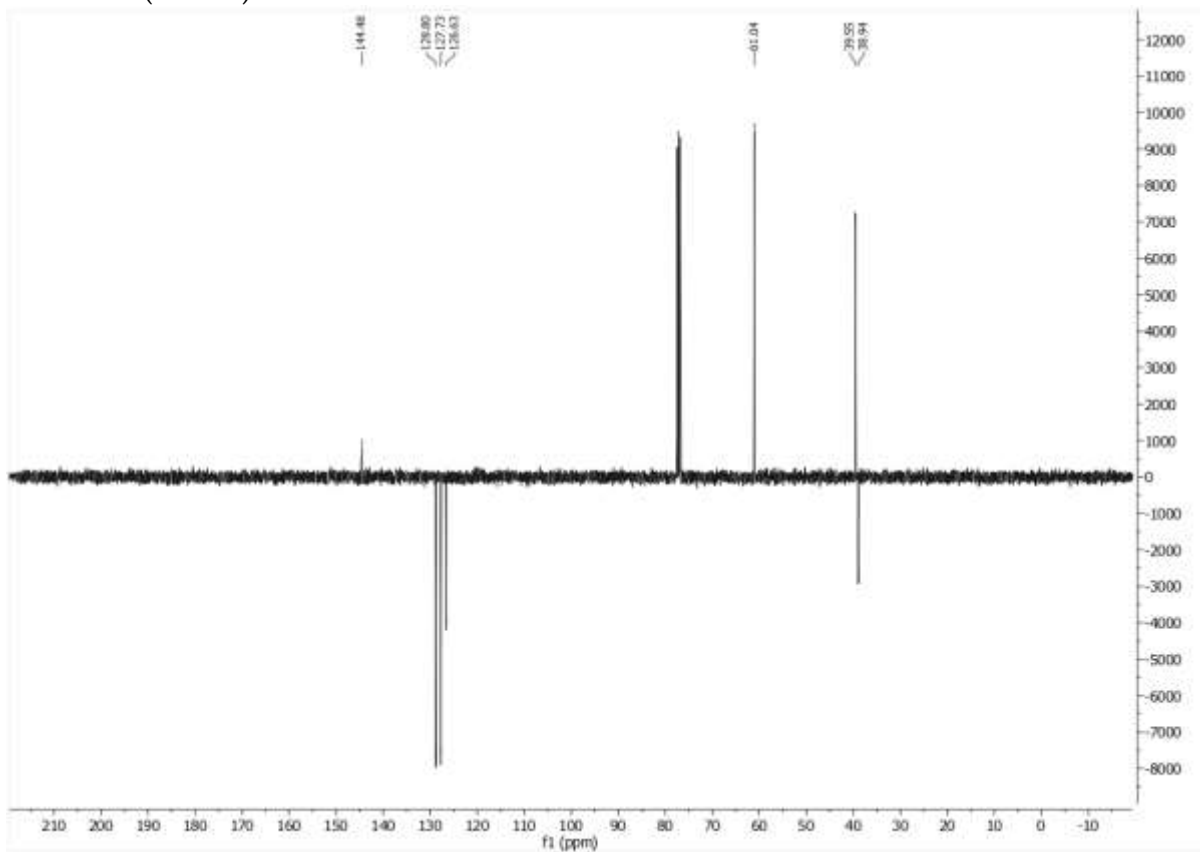

Compound 48 <sup>1</sup>H NMR (CDCl<sub>3</sub>)

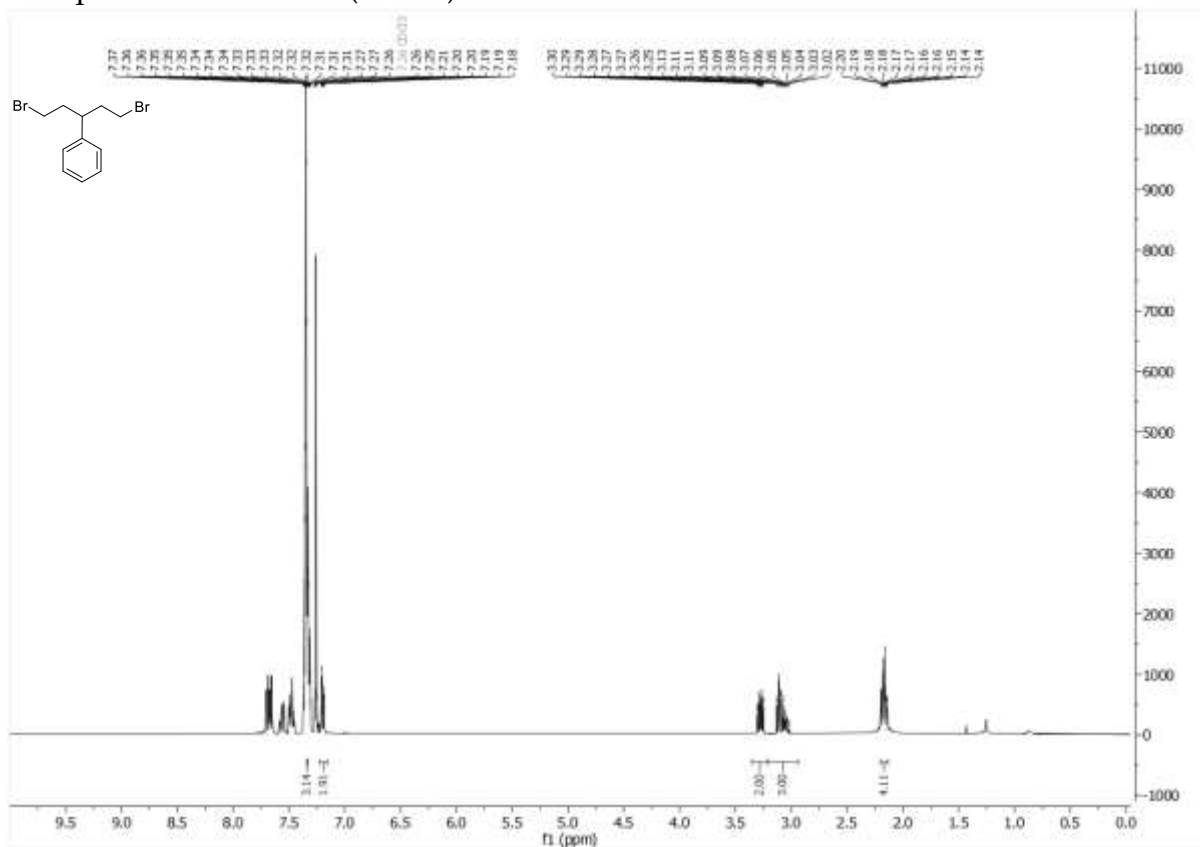

<sup>13</sup>C NMR (CDCl<sub>3</sub>)

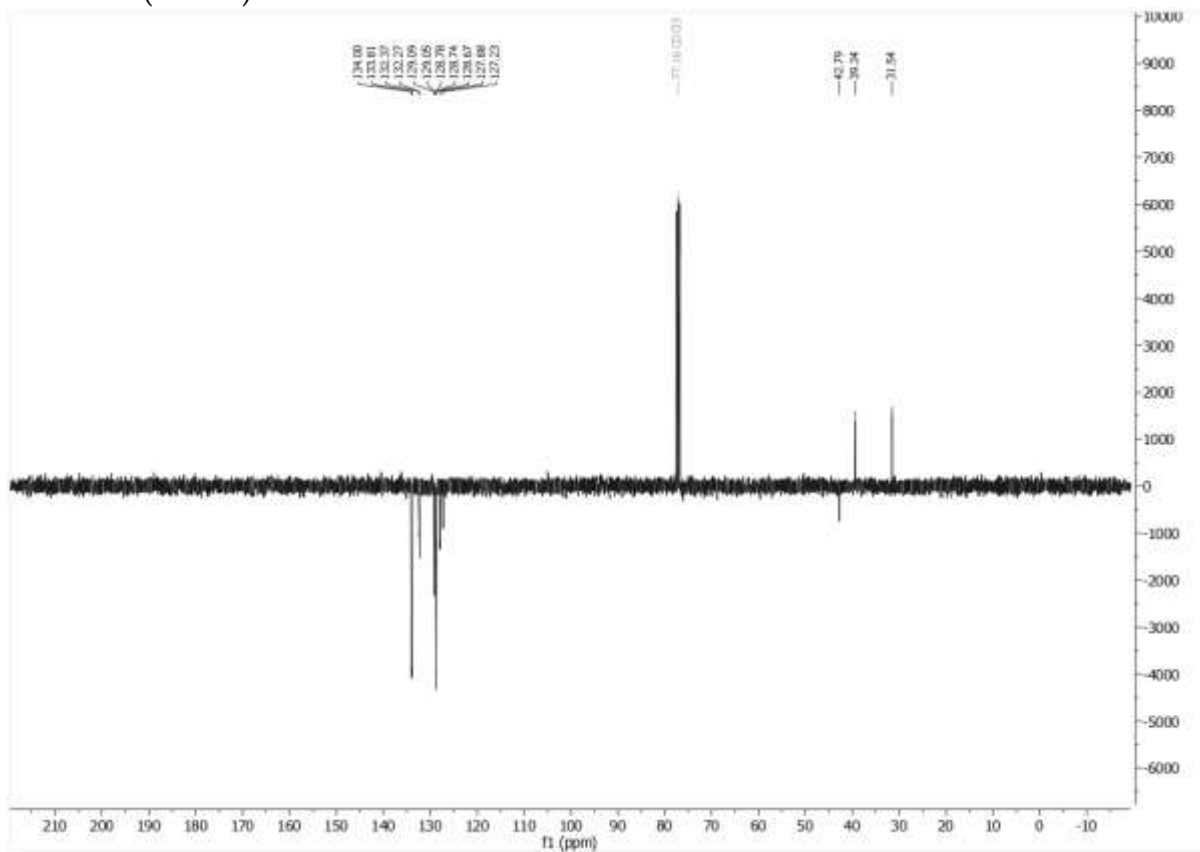

Compound **49**  $^1\text{H}$  NMR ( $\text{CDCl}_3$ )

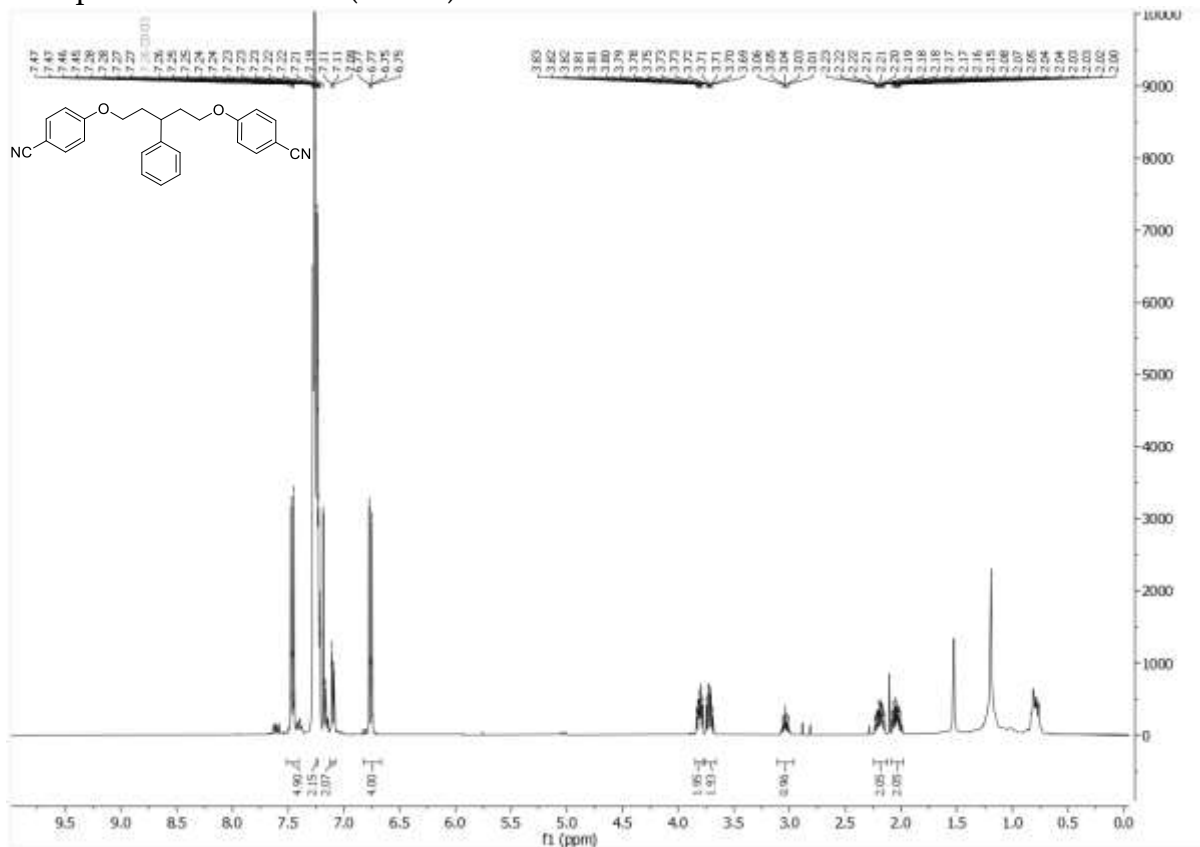

$^{13}\text{C}$  NMR ( $\text{CDCl}_3$ )

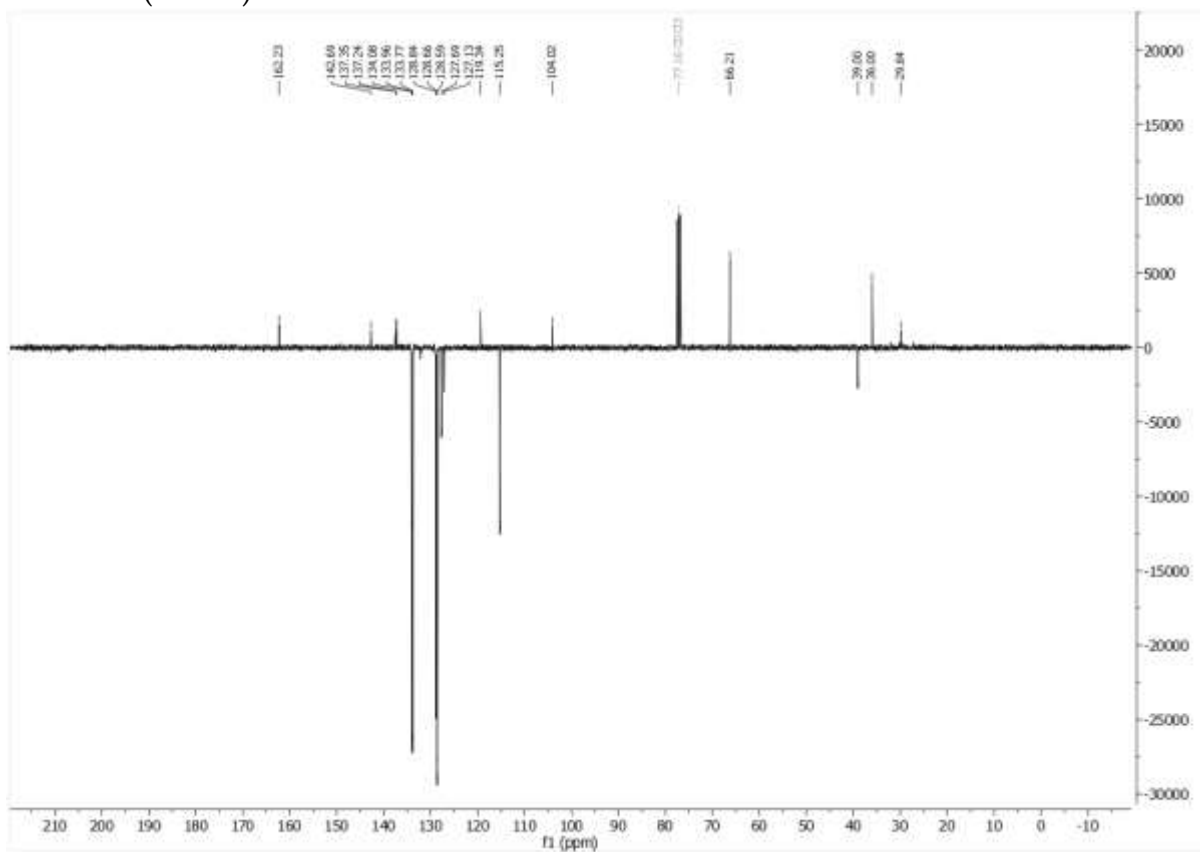

## HPLC traces of the final compounds

### Compound 1 (pentamidine)

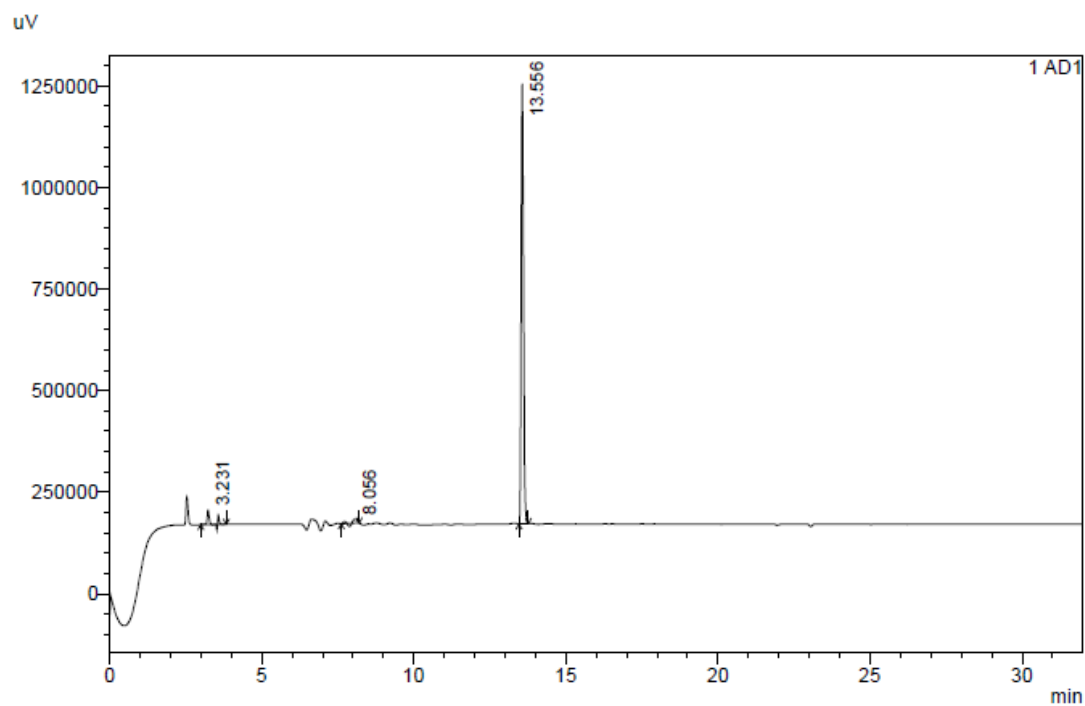

| Peak# | R.Time | I.Time | F.Time | Area    | Height  | A/H   | Conc.  |
|-------|--------|--------|--------|---------|---------|-------|--------|
| 1     | 3.231  | 2.992  | 3.825  | 190502  | 35279   | 5.400 | 3.229  |
| 2     | 8.056  | 7.608  | 8.200  | 69410   | 9121    | 7.610 | 1.176  |
| 3     | 13.556 | 13.450 | 13.758 | 5640117 | 1083450 | 5.206 | 95.595 |

## Compound 2

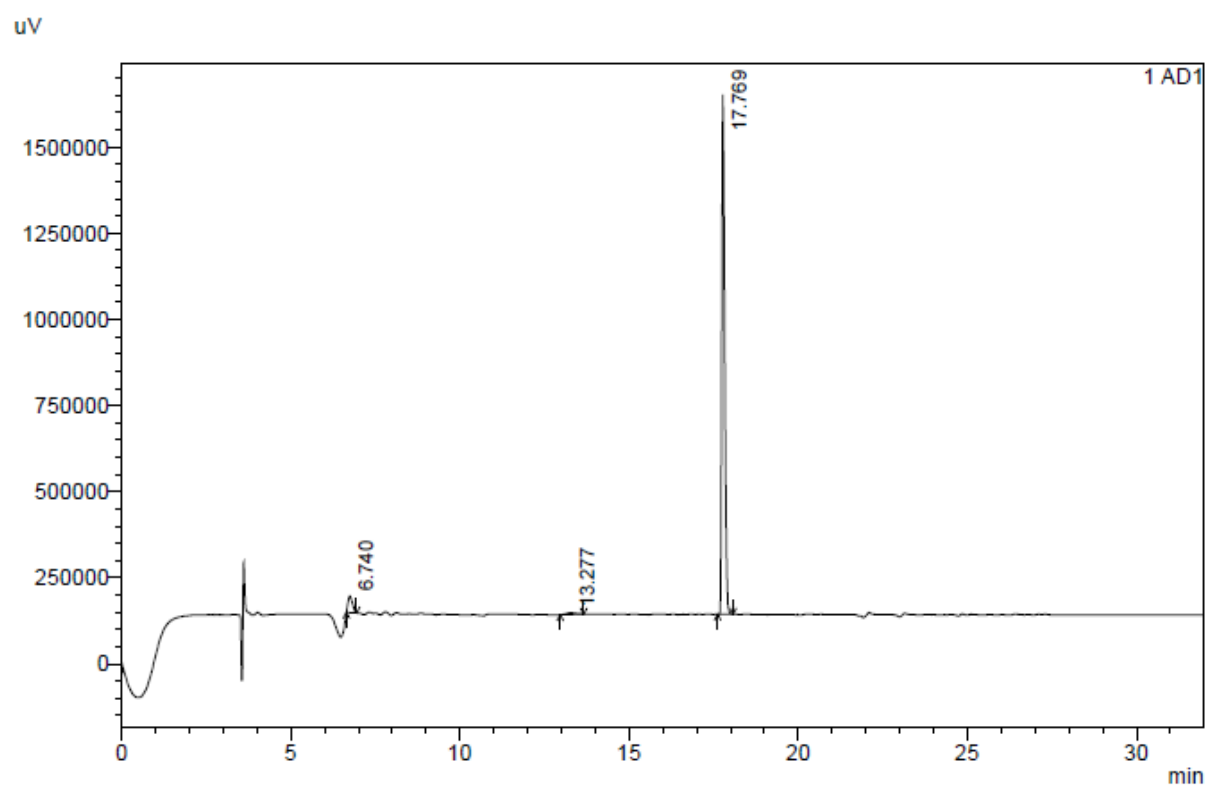

| Peak# | R.Time | I.Time | F.Time | Area    | Height  | A/H    | Conc.  |
|-------|--------|--------|--------|---------|---------|--------|--------|
| 1     | 6.740  | 6.642  | 6.942  | 443553  | 47778   | 9.284  | 4.540  |
| 2     | 13.277 | 12.958 | 13.658 | 88491   | 4715    | 18.767 | 0.906  |
| 3     | 17.769 | 17.617 | 18.067 | 9236966 | 1507950 | 6.126  | 94.554 |

### Compound 3

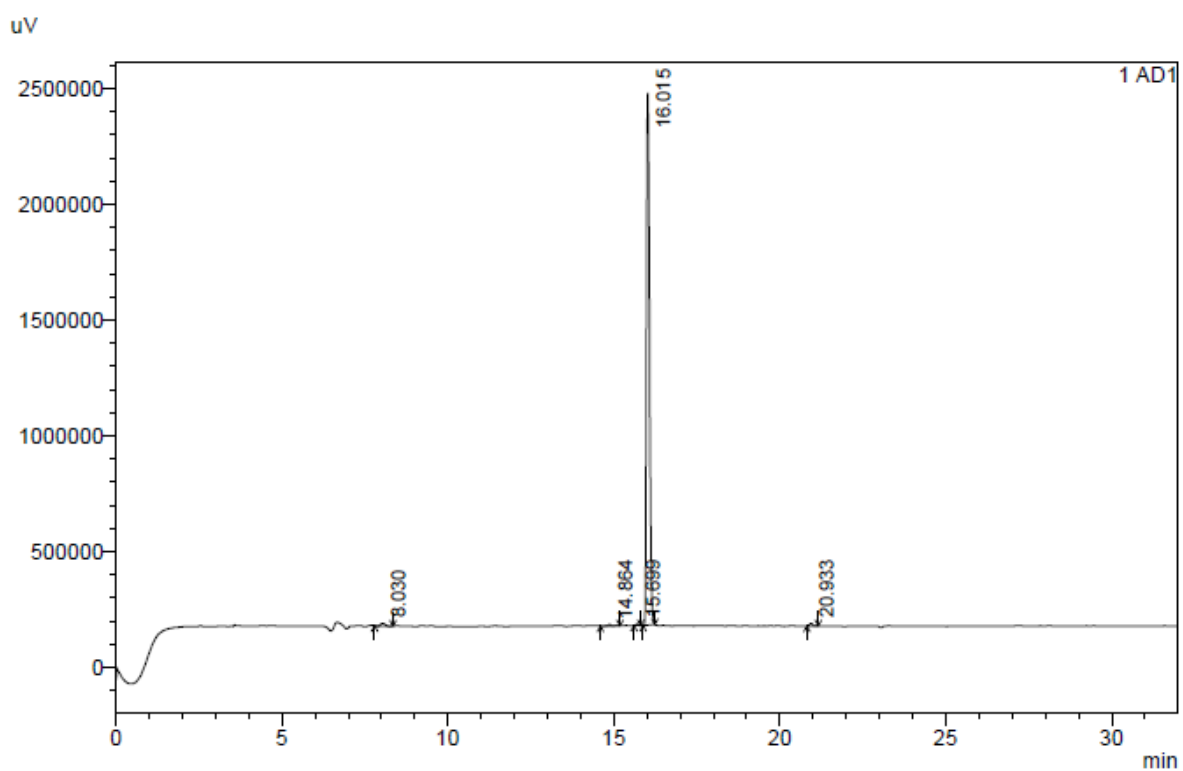

| Peak# | R.Time | I.Time | F.Time | Area     | Height  | A/H   | Conc.  |
|-------|--------|--------|--------|----------|---------|-------|--------|
| 1     | 8.030  | 7.783  | 8.342  | 60897    | 11027   | 5.522 | 0.414  |
| 2     | 14.864 | 14.592 | 15.183 | 37761    | 6700    | 5.636 | 0.257  |
| 3     | 15.699 | 15.600 | 15.808 | 34487    | 7583    | 4.548 | 0.235  |
| 4     | 16.015 | 15.875 | 16.225 | 14503539 | 2298347 | 6.310 | 98.645 |
| 5     | 20.933 | 20.808 | 21.158 | 66145    | 11357   | 5.824 | 0.450  |

## Compound 9

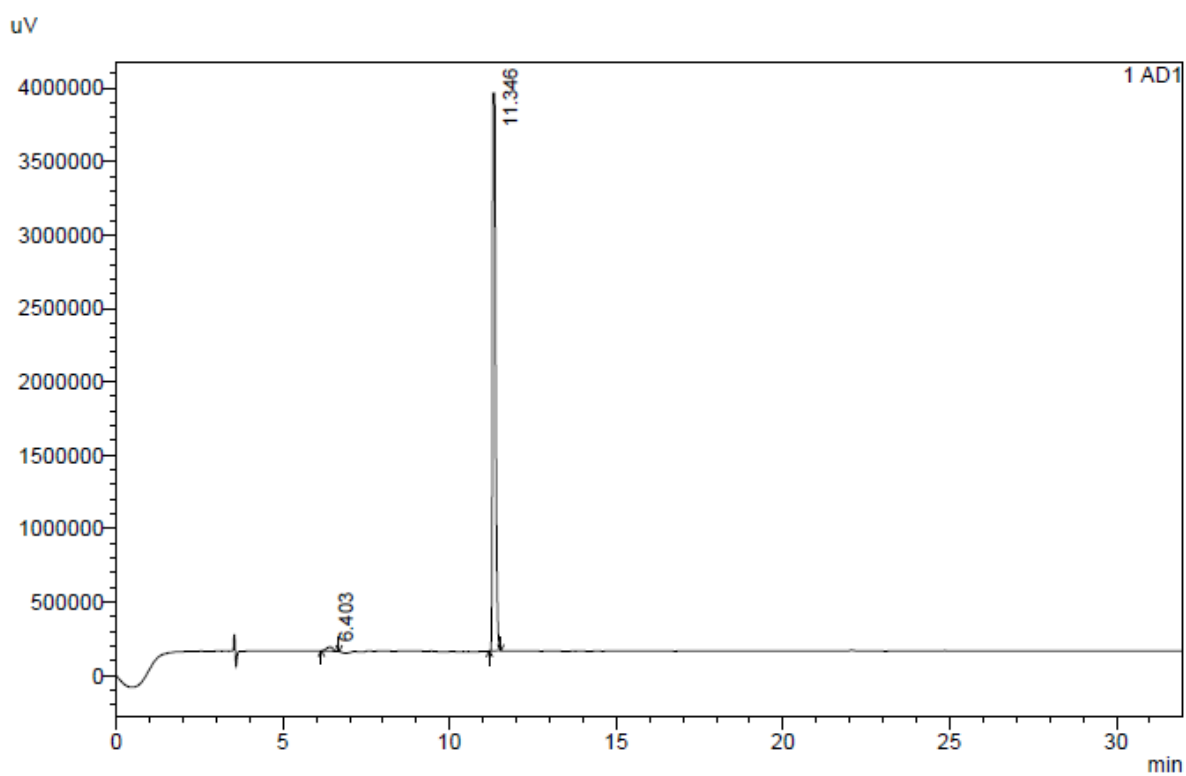

| Peak# | R.Time | I.Time | F.Time | Area     | Height  | A/H    | Conc.  |
|-------|--------|--------|--------|----------|---------|--------|--------|
| 1     | 6.403  | 6.150  | 6.675  | 374416   | 28114   | 13.318 | 1.440  |
| 2     | 11.346 | 11.192 | 11.533 | 25632395 | 3795638 | 6.753  | 98.560 |

## Compound 10

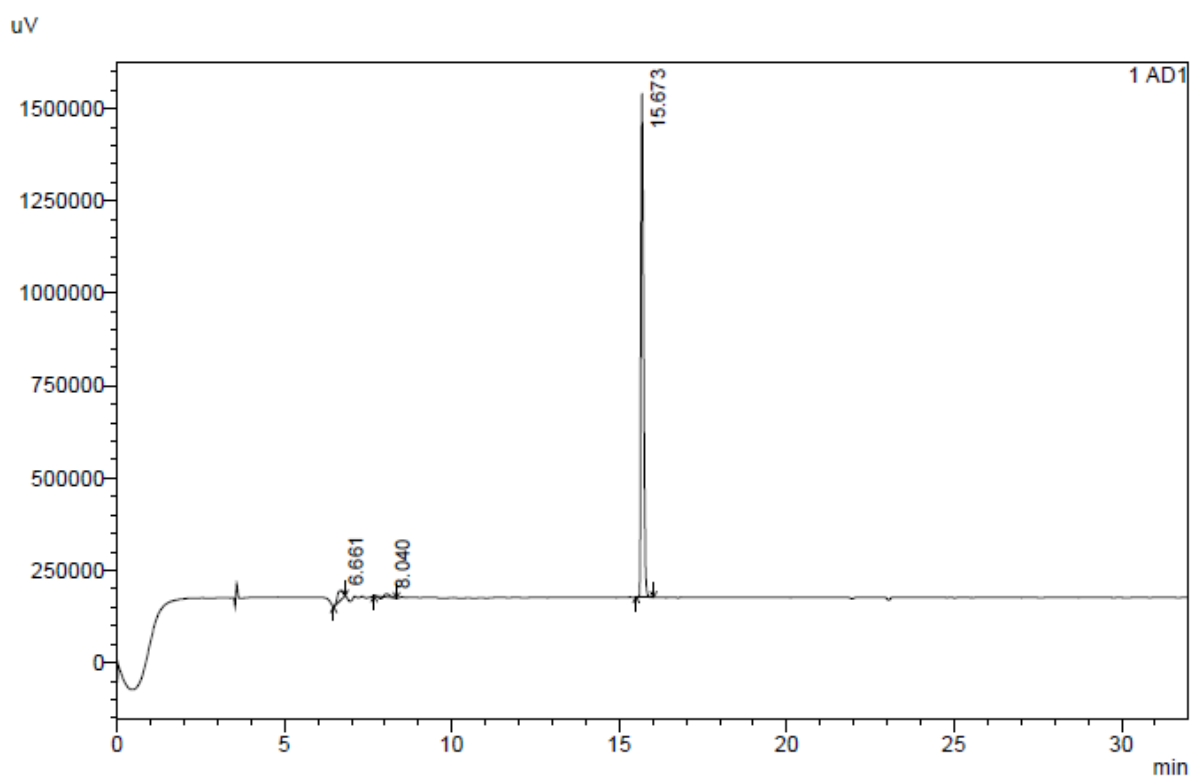

| Peak# | R.Time | I.Time | F.Time | Area    | Height  | A/H    | Conc.  |
|-------|--------|--------|--------|---------|---------|--------|--------|
| 1     | 6.661  | 6.467  | 6.808  | 308582  | 26667   | 11.572 | 3.980  |
| 2     | 8.040  | 7.675  | 8.342  | 60636   | 8554    | 7.088  | 0.782  |
| 3     | 15.673 | 15.500 | 16.017 | 7383375 | 1363595 | 5.415  | 95.237 |



# Compound 11

uV

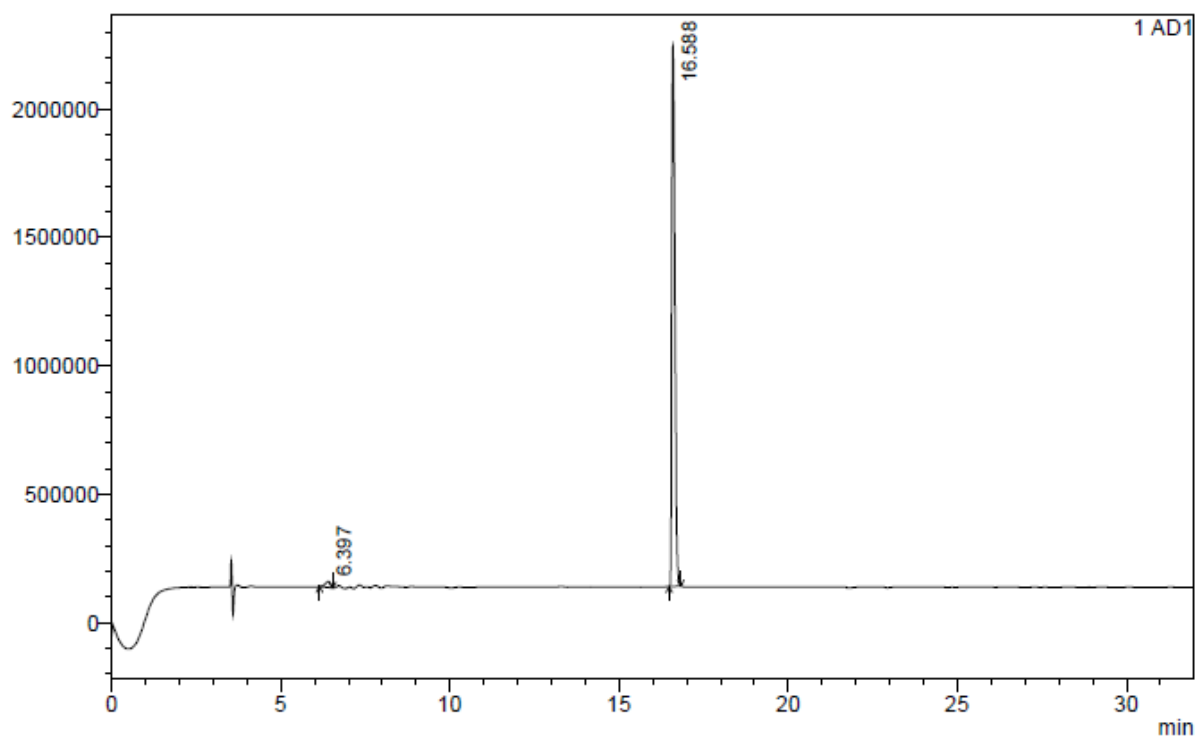

| Peak# | R.Time | I.Time | F.Time | Area     | Height  | A/H    | Conc.  |
|-------|--------|--------|--------|----------|---------|--------|--------|
| 1     | 6.397  | 6.142  | 6.533  | 239908   | 23412   | 10.247 | 1.741  |
| 2     | 16.588 | 16.475 | 16.817 | 13541831 | 2104780 | 6.434  | 98.259 |

## Compound 12

uV

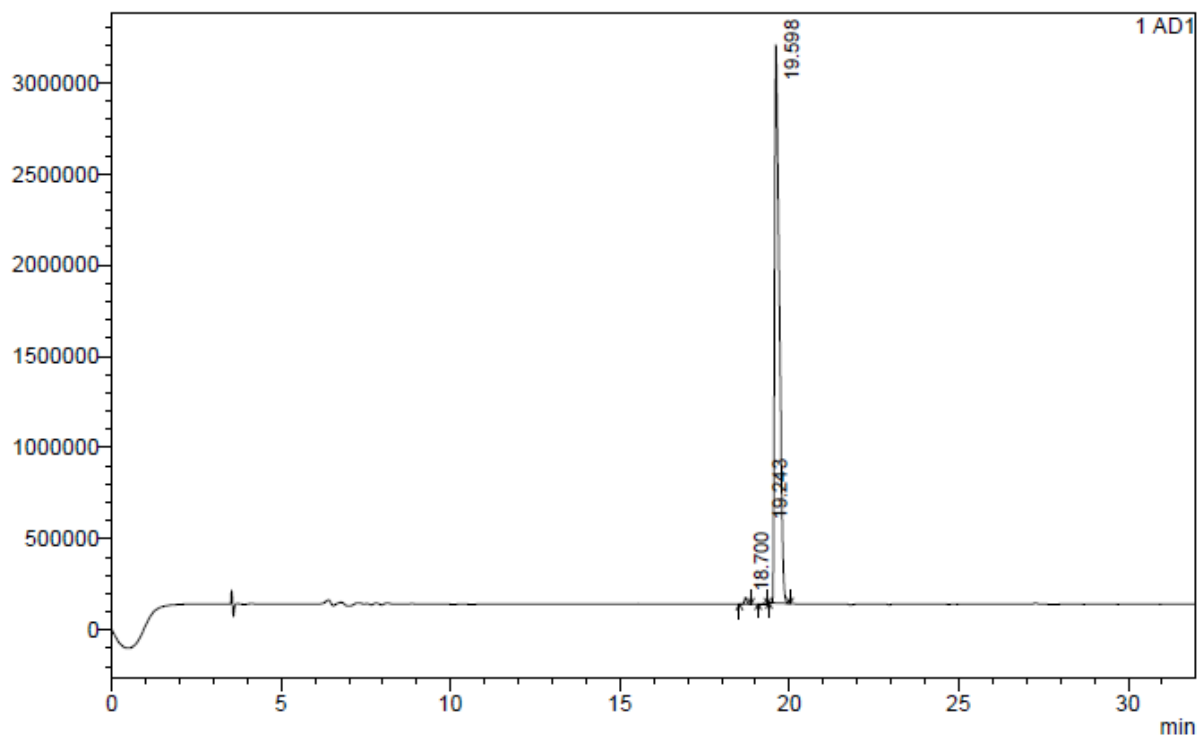

| Peak# | R.Time | I.Time | F.Time | Area     | Height  | A/H   | Conc.  |
|-------|--------|--------|--------|----------|---------|-------|--------|
| 1     | 18.700 | 18.517 | 18.867 | 175315   | 34829   | 5.034 | 0.585  |
| 2     | 19.243 | 19.075 | 19.350 | 6383     | 2594    | 2.461 | 0.021  |
| 3     | 19.598 | 19.392 | 20.017 | 29799644 | 3061564 | 9.733 | 99.394 |

# Compound 15

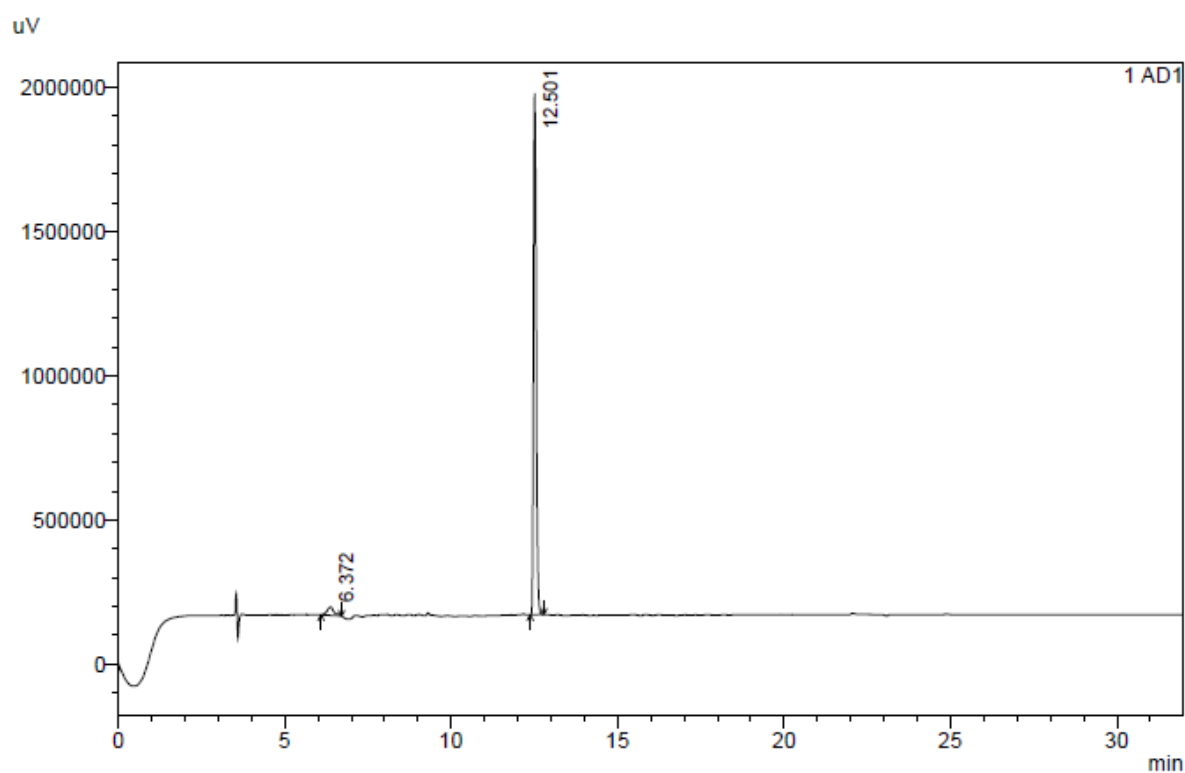

| Peak# | R.Time | I.Time | F.Time | Area     | Height  | A/H    | Conc.  |
|-------|--------|--------|--------|----------|---------|--------|--------|
| 1     | 6.372  | 6.083  | 6.700  | 423802   | 29177   | 14.525 | 3.979  |
| 2     | 12.501 | 12.367 | 12.783 | 10226985 | 1807168 | 5.659  | 96.021 |

# Compound 16

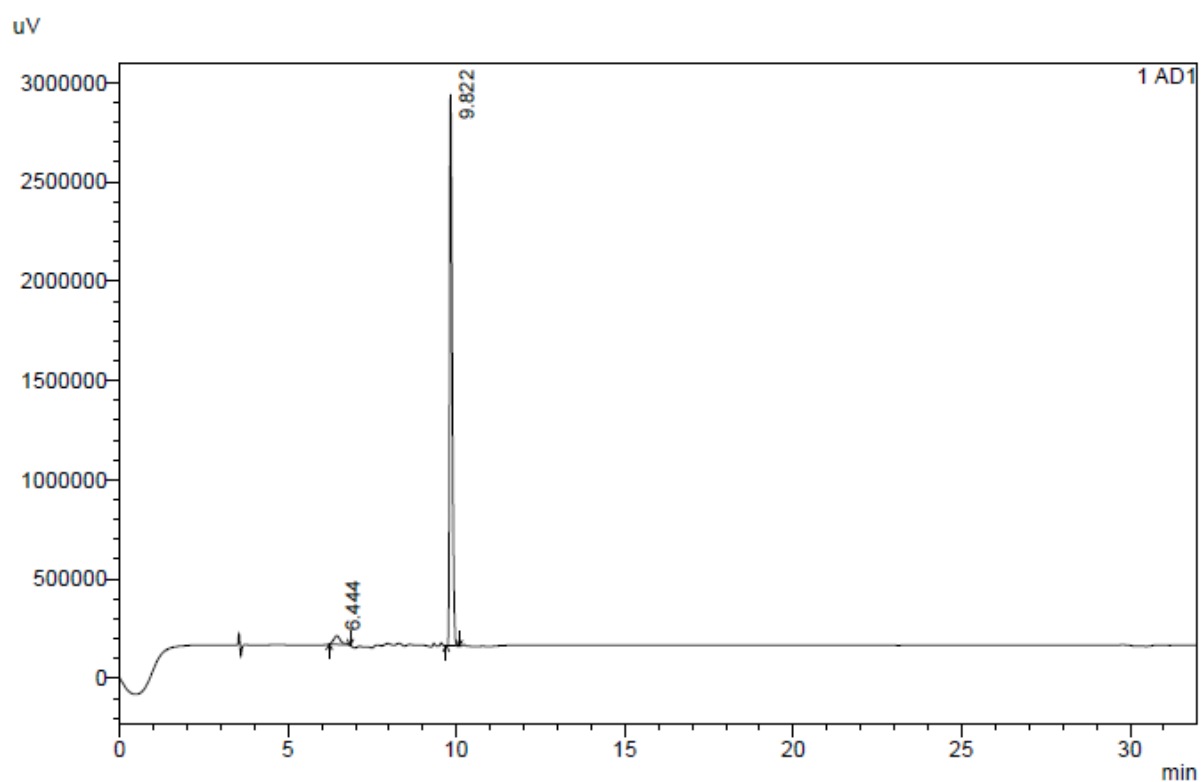

| Peak# | R.Time | I.Time | F.Time | Area     | Height  | A/H    | Conc.  |
|-------|--------|--------|--------|----------|---------|--------|--------|
| 1     | 6.444  | 6.217  | 6.842  | 655818   | 43897   | 14.940 | 4.240  |
| 2     | 9.822  | 9.692  | 10.075 | 14811375 | 2776888 | 5.334  | 95.760 |

# Compound 21

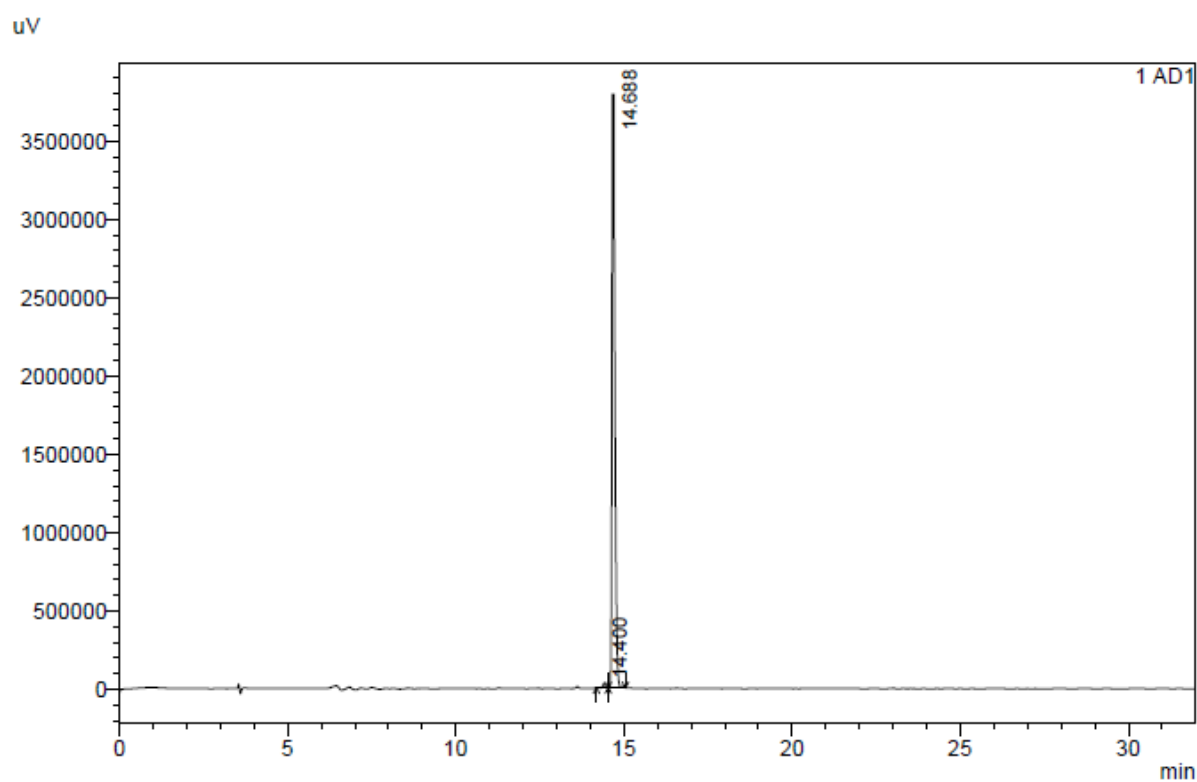

| Peak# | R.Time | I.Time | F.Time | Area     | Height  | A/H   | Conc.  |
|-------|--------|--------|--------|----------|---------|-------|--------|
| 1     | 14.400 | 14.175 | 14.525 | 142542   | 29102   | 4.898 | 0.593  |
| 2     | 14.688 | 14.525 | 15.042 | 23905797 | 3788678 | 6.310 | 99.407 |

## Compound 22

uV

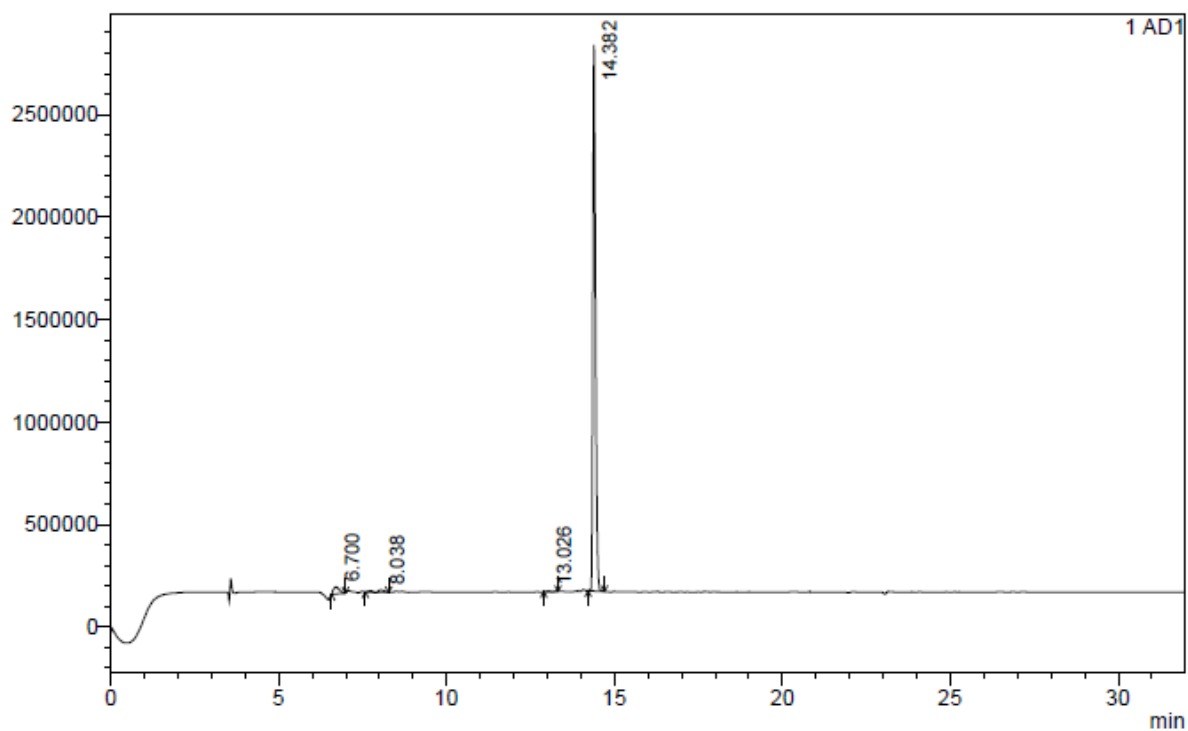

| Peak# | R.Time | I.Time | F.Time | Area     | Height  | A/H    | Conc.  |
|-------|--------|--------|--------|----------|---------|--------|--------|
| 1     | 6.700  | 6.567  | 6.983  | 401732   | 33536   | 11.979 | 2.572  |
| 2     | 8.038  | 7.575  | 8.267  | 158535   | 10627   | 14.918 | 1.015  |
| 3     | 13.026 | 12.892 | 13.308 | 473      | 3816    | 0.124  | 0.003  |
| 4     | 14.382 | 14.208 | 14.700 | 15059471 | 2664649 | 5.652  | 96.410 |

# Compound 23

uV

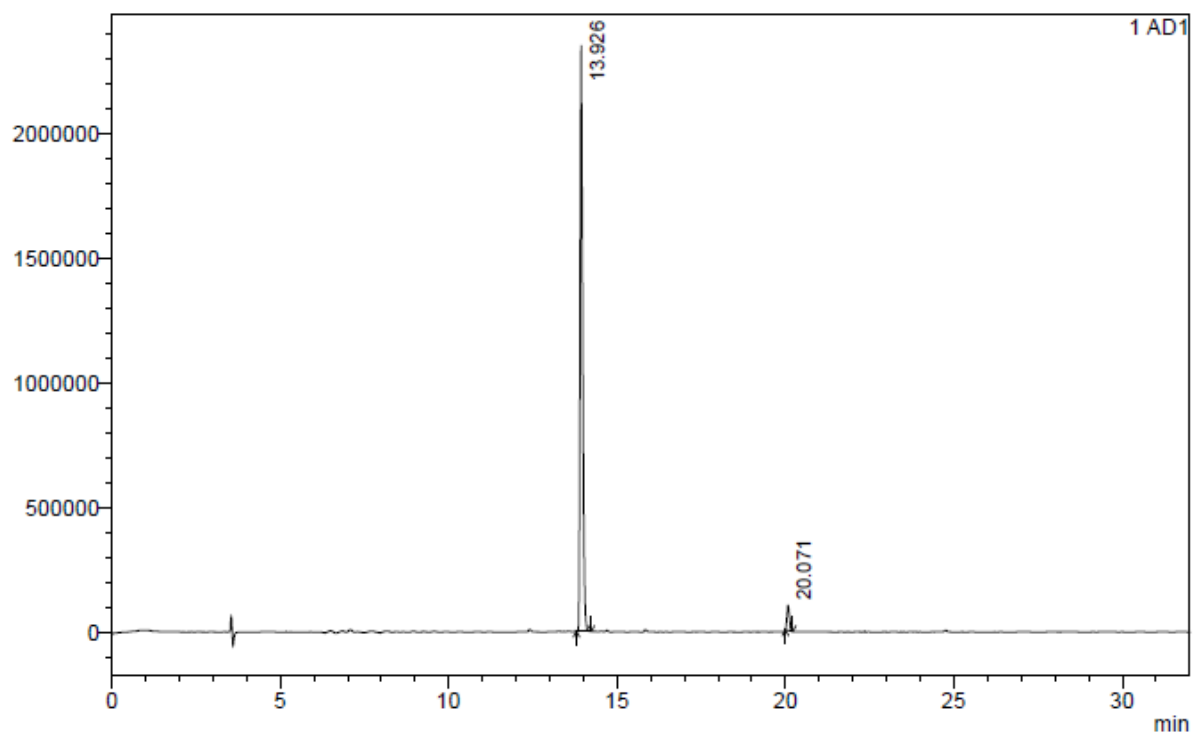

| Peak# | R.Time | I.Time | F.Time | Area     | Height  | A/H   | Conc.  |
|-------|--------|--------|--------|----------|---------|-------|--------|
| 1     | 13.926 | 13.792 | 14.225 | 12946767 | 2350277 | 5.509 | 95.971 |
| 2     | 20.071 | 19.992 | 20.217 | 543566   | 101156  | 5.374 | 4.029  |

# Compound 24

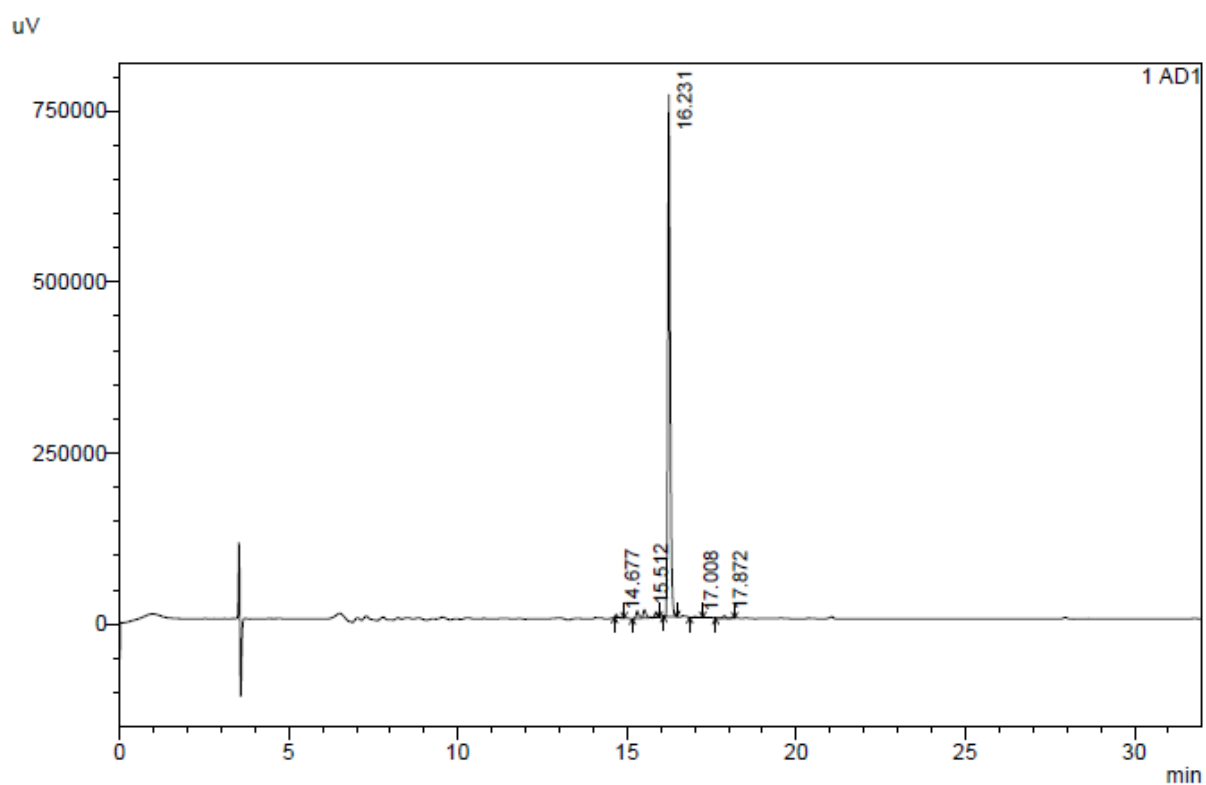

| Peak# | R.Time | I.Time | F.Time | Area    | Height | A/H    | Conc.  |
|-------|--------|--------|--------|---------|--------|--------|--------|
| 1     | 14.677 | 14.625 | 14.908 | 12503   | 4226   | 2.958  | 0.314  |
| 2     | 15.512 | 15.150 | 15.950 | 166069  | 11935  | 13.915 | 4.175  |
| 3     | 16.231 | 16.083 | 16.467 | 3768502 | 763165 | 4.938  | 94.742 |
| 4     | 17.008 | 16.850 | 17.233 | 10857   | 1486   | 7.309  | 0.273  |
| 5     | 17.872 | 17.617 | 18.175 | 19730   | 3456   | 5.708  | 0.496  |



## Compound 1b

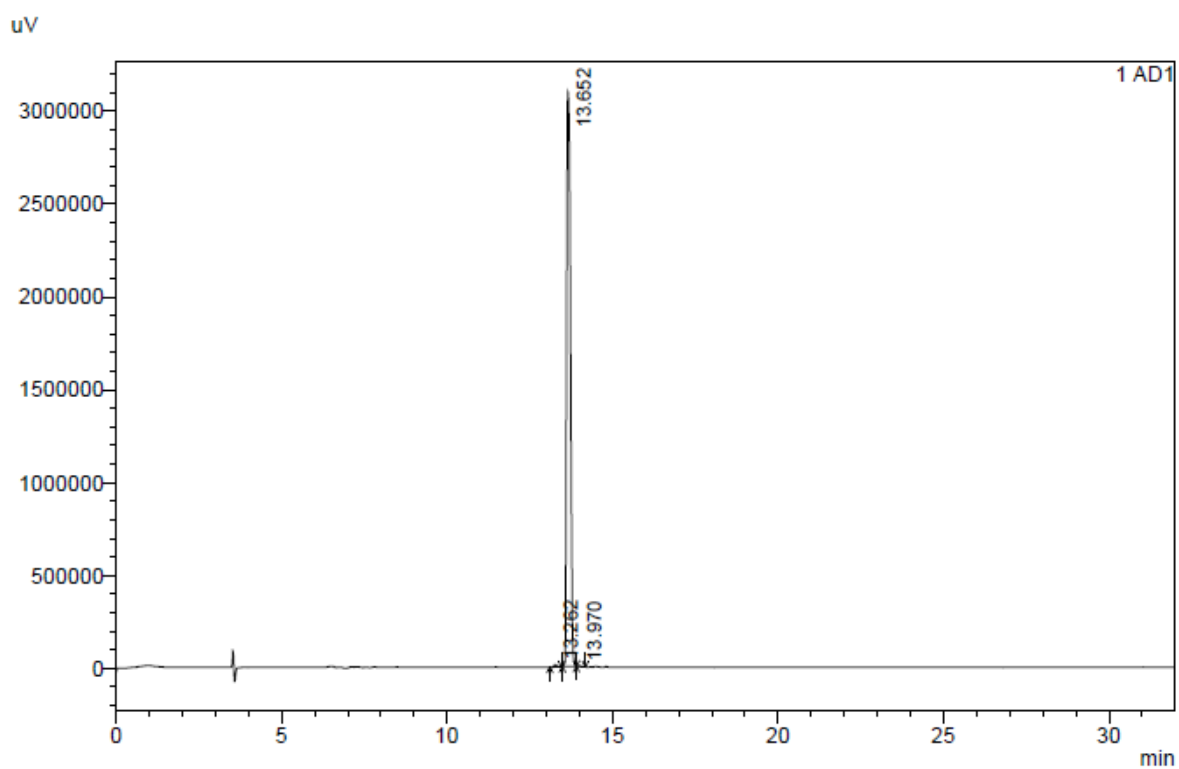

| Peak# | R.Time | I.Time | F.Time | Area     | Height  | A/H   | Conc.  |
|-------|--------|--------|--------|----------|---------|-------|--------|
| 1     | 13.262 | 13.100 | 13.450 | 83660    | 14203   | 5.890 | 0.331  |
| 2     | 13.652 | 13.483 | 13.900 | 25196598 | 3093159 | 8.146 | 99.595 |
| 3     | 13.970 | 13.900 | 14.175 | 18717    | 5136    | 3.644 | 0.074  |

# Compound 21b

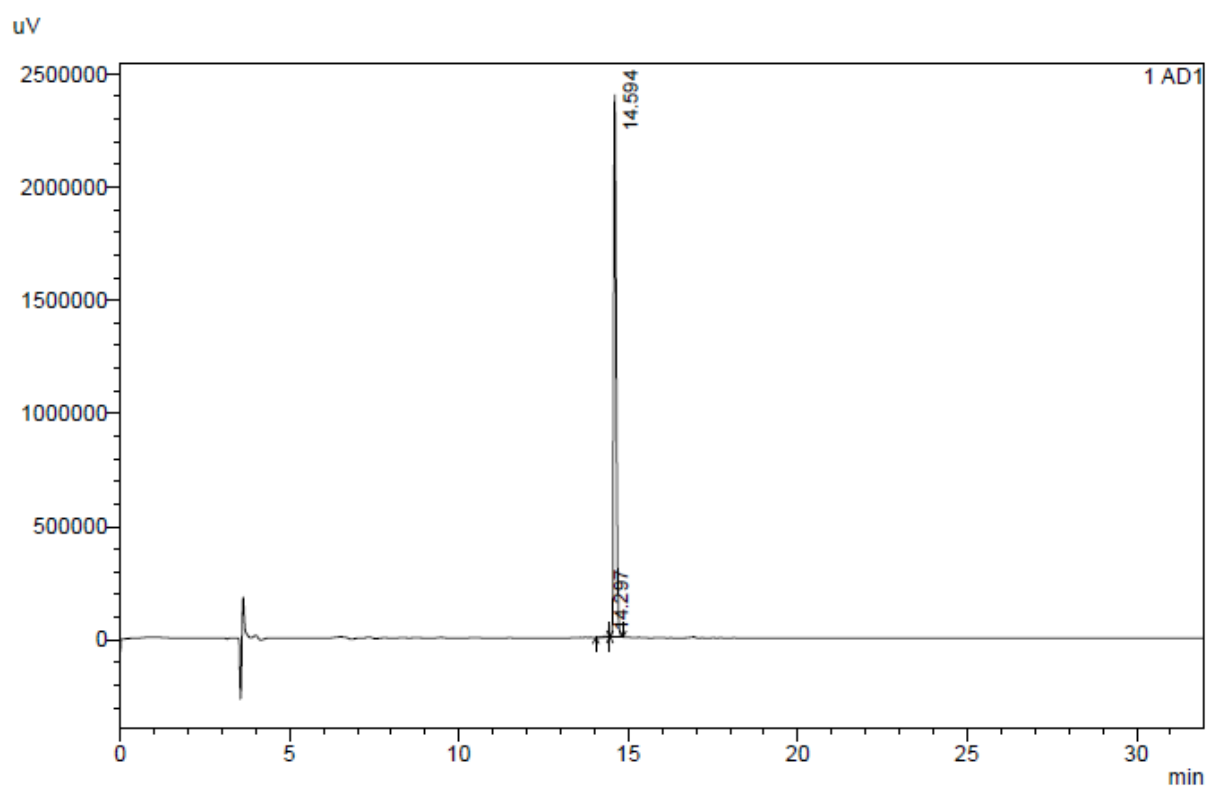

| Peak# | R.Time | I.Time | F.Time | Area     | Height  | A/H   | Conc.  |
|-------|--------|--------|--------|----------|---------|-------|--------|
| 1     | 14.297 | 14.033 | 14.450 | 22797    | 4495    | 5.072 | 0.184  |
| 2     | 14.594 | 14.450 | 14.833 | 12365991 | 2395367 | 5.162 | 99.816 |

## Compound 22b

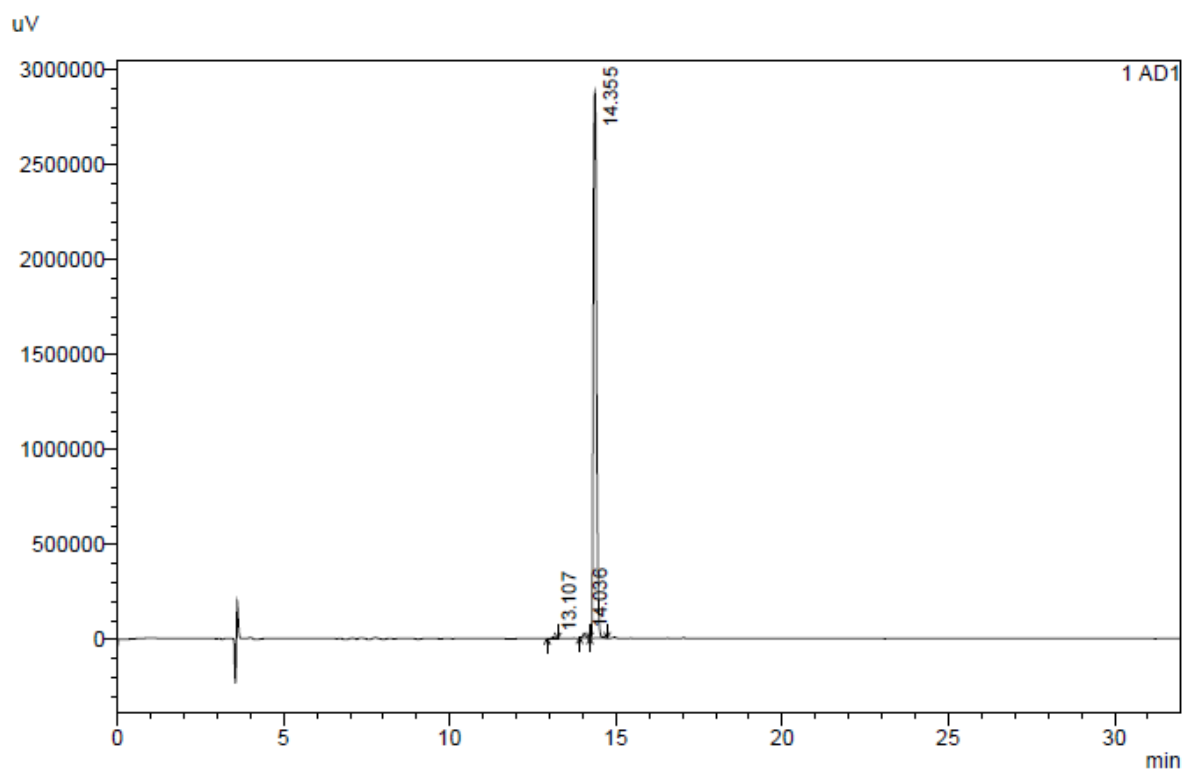

| Peak# | R.Time | I.Time | F.Time | Area     | Height  | A/H   | Conc.  |
|-------|--------|--------|--------|----------|---------|-------|--------|
| 1     | 13.107 | 12.925 | 13.242 | 45068    | 8390    | 5.372 | 0.228  |
| 2     | 14.036 | 13.900 | 14.208 | 157275   | 24844   | 6.330 | 0.796  |
| 3     | 14.355 | 14.208 | 14.733 | 19561400 | 2877992 | 6.797 | 98.976 |

# Compound 23b

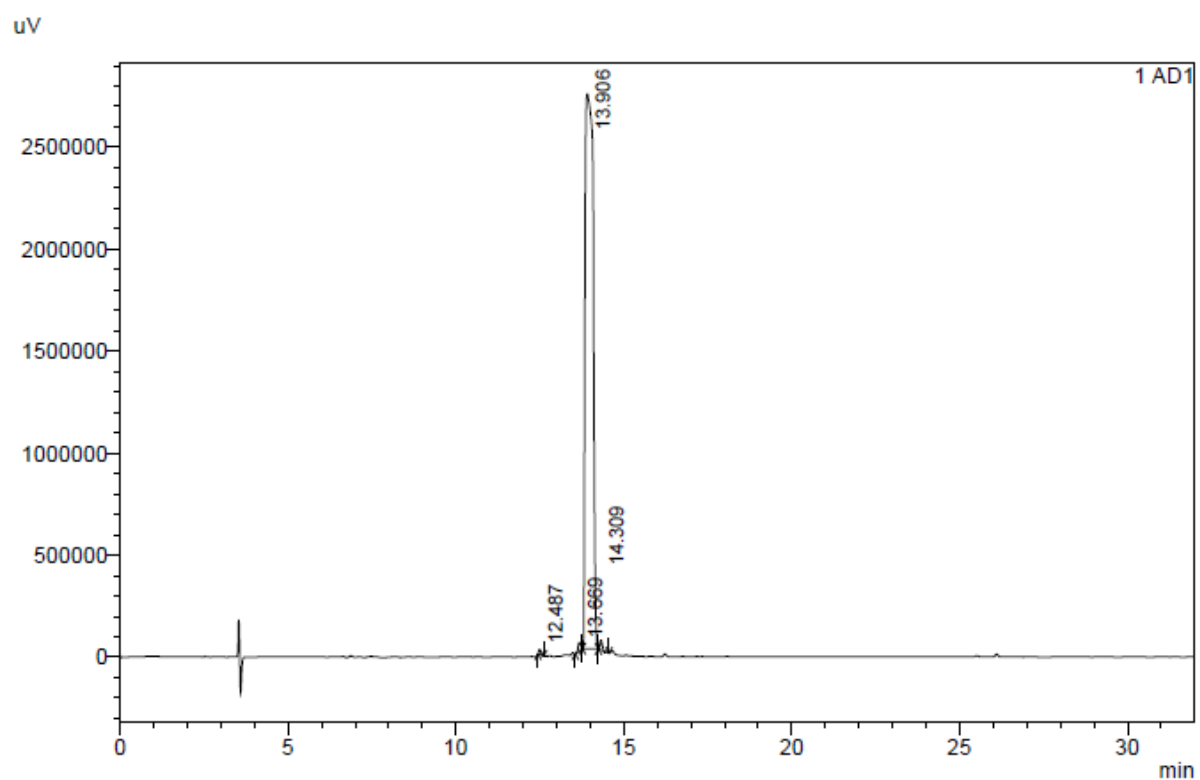

| Peak# | R.Time | I.Time | F.Time | Area     | Height  | A/H    | Conc.  |
|-------|--------|--------|--------|----------|---------|--------|--------|
| 1     | 12.487 | 12.442 | 12.608 | 101927   | 23975   | 4.251  | 0.227  |
| 2     | 13.669 | 13.550 | 13.758 | 232873   | 39151   | 5.948  | 0.519  |
| 3     | 13.906 | 13.758 | 14.242 | 44303219 | 2719916 | 16.288 | 98.729 |
| 4     | 14.309 | 14.242 | 14.558 | 235457   | 47432   | 4.964  | 0.525  |

# Compound 1c

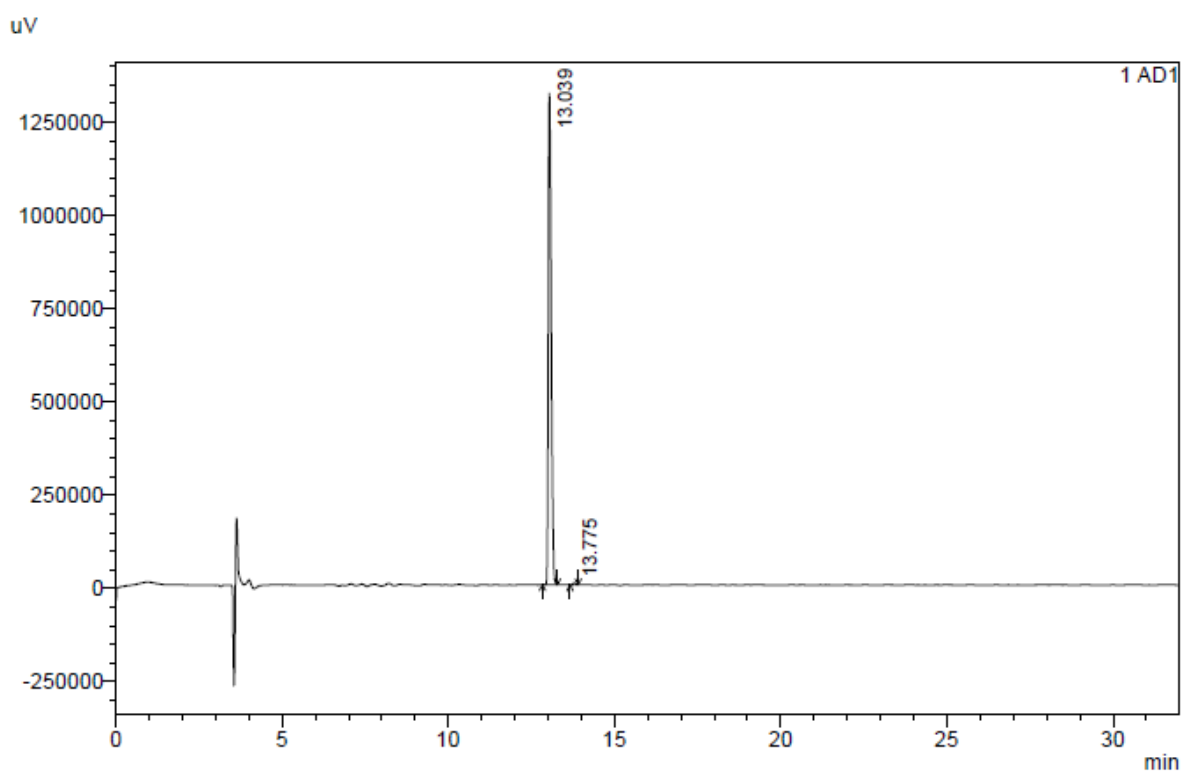

| R.Time | I.Time | F.Time | Area   | Height  | A/H     | Conc. | Mark   |
|--------|--------|--------|--------|---------|---------|-------|--------|
| 1      | 13.039 | 12.825 | 13.275 | 8183496 | 1318105 | 6.209 | 99.663 |
| 2      | 13.775 | 13.658 | 13.900 | 27695   | 5568    | 4.974 | 0.337  |

# Compound 21c

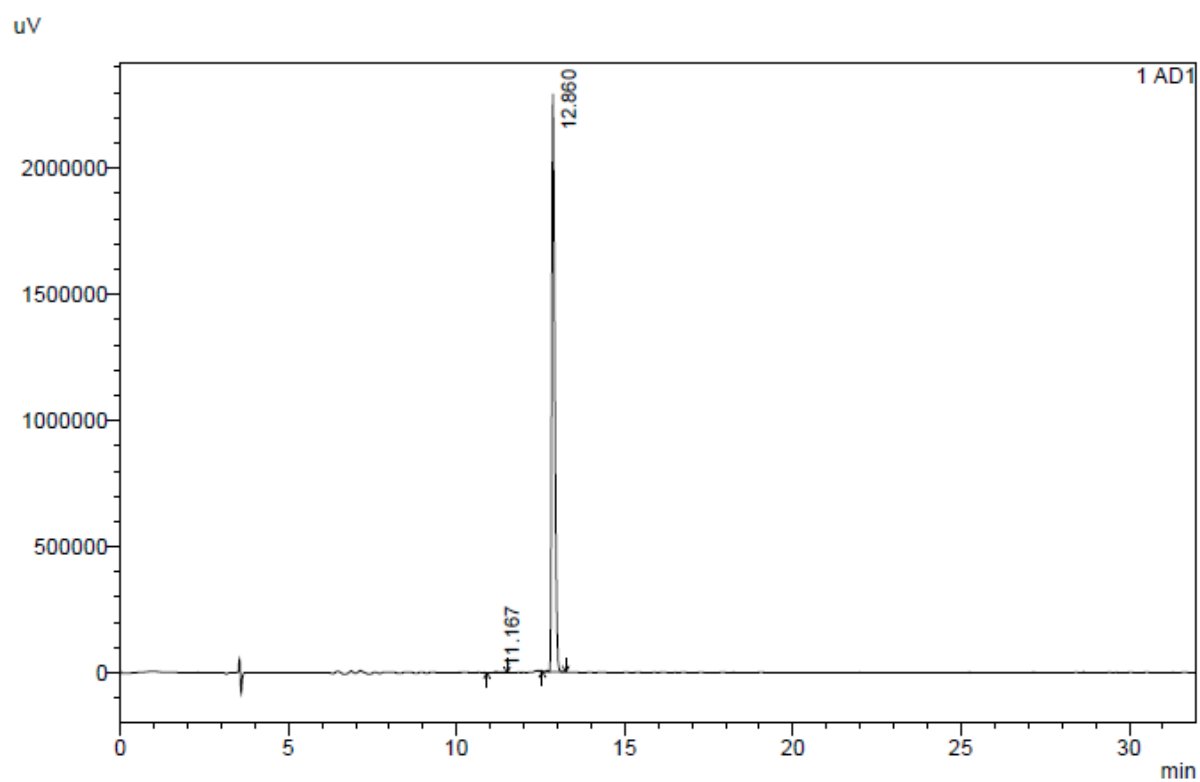

| Peak# | R.Time | I.Time | F.Time | Area     | Height  | A/H   | Conc.  |
|-------|--------|--------|--------|----------|---------|-------|--------|
| 1     | 11.167 | 10.900 | 11.500 | 35151    | 4153    | 8.464 | 0.237  |
| 2     | 12.860 | 12.542 | 13.242 | 14803062 | 2289534 | 6.466 | 99.763 |

# Compound 22c

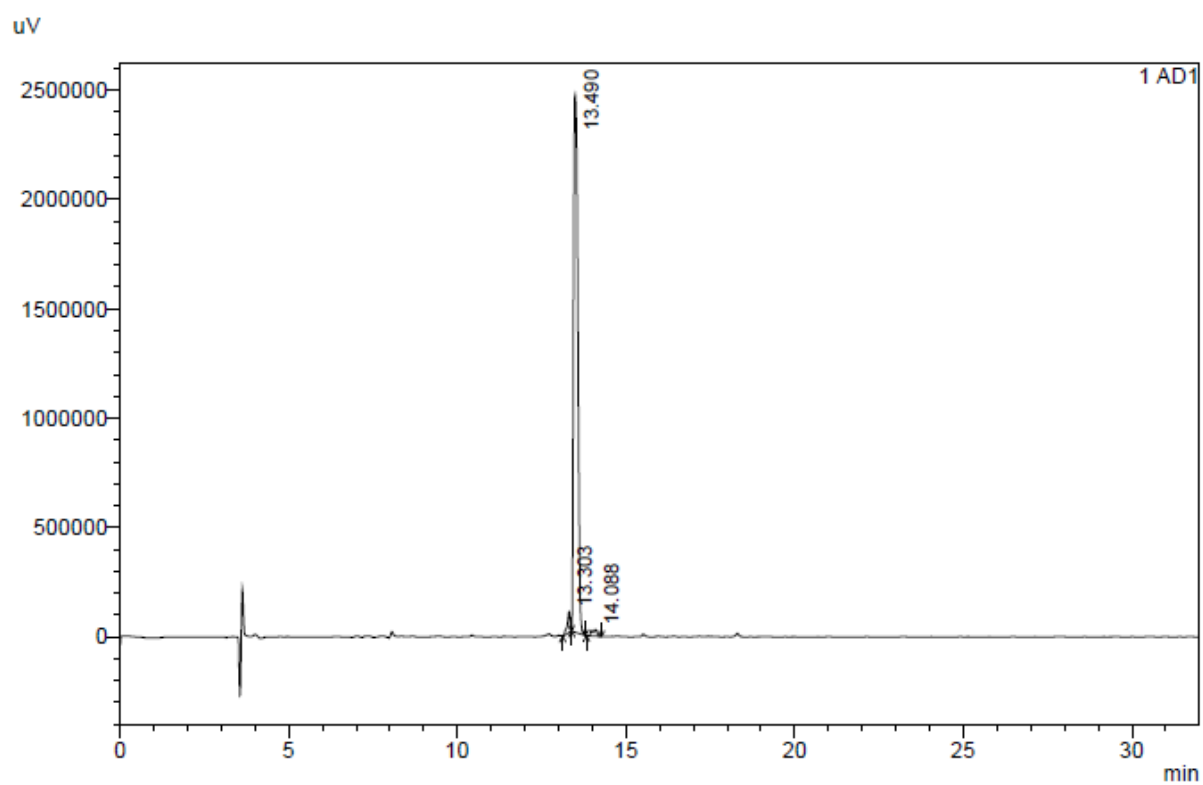

| Peak# | R.Time | I.Time | F.Time | Area     | Height  | A/H    | Conc.  |
|-------|--------|--------|--------|----------|---------|--------|--------|
| 1     | 13.303 | 13.117 | 13.375 | 552622   | 96040   | 5.754  | 2.454  |
| 2     | 13.490 | 13.383 | 13.792 | 21644706 | 2461180 | 8.794  | 96.112 |
| 3     | 14.088 | 13.825 | 14.267 | 322991   | 31356   | 10.301 | 1.434  |

# Compound 23c

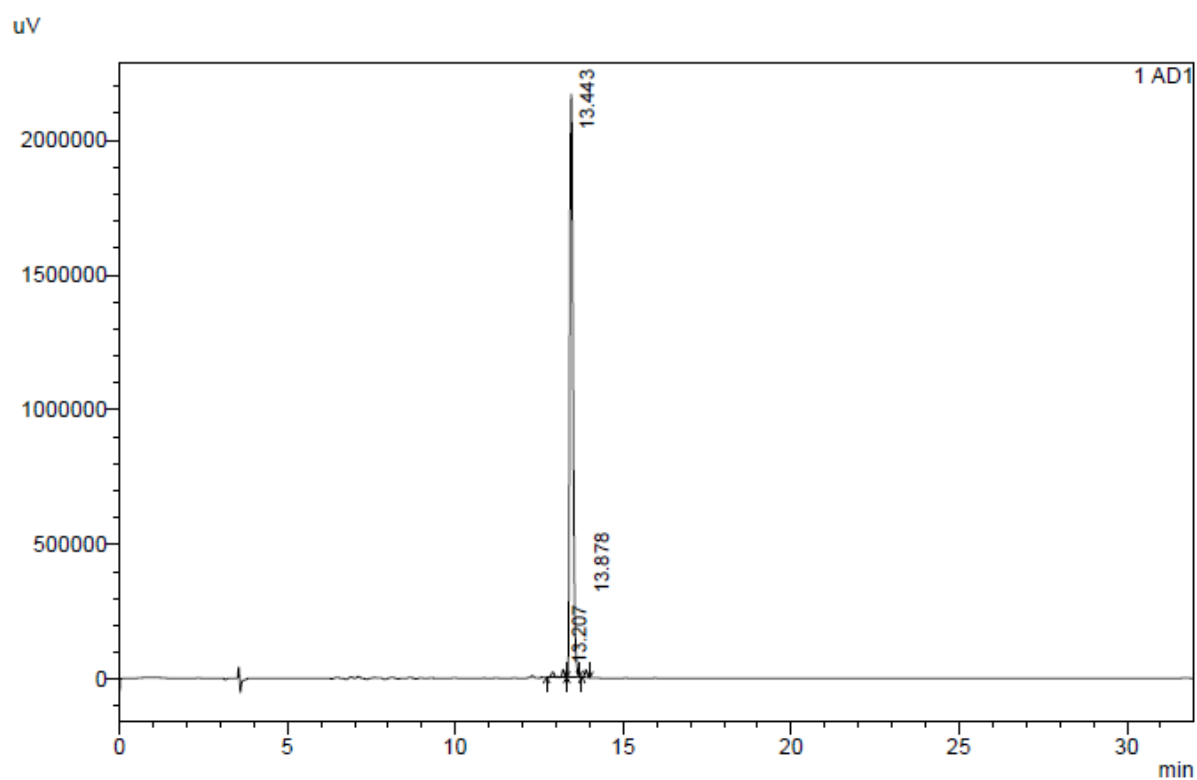

| Peak# | R.Time | I.Time | F.Time | Area     | Height  | A/H   | Conc.  |
|-------|--------|--------|--------|----------|---------|-------|--------|
| 1     | 13.207 | 12.717 | 13.308 | 248041   | 27492   | 9.022 | 1.597  |
| 2     | 13.443 | 13.308 | 13.692 | 15137905 | 2164339 | 6.994 | 97.492 |
| 3     | 13.878 | 13.758 | 14.000 | 141331   | 28156   | 5.020 | 0.910  |



# Compound 37

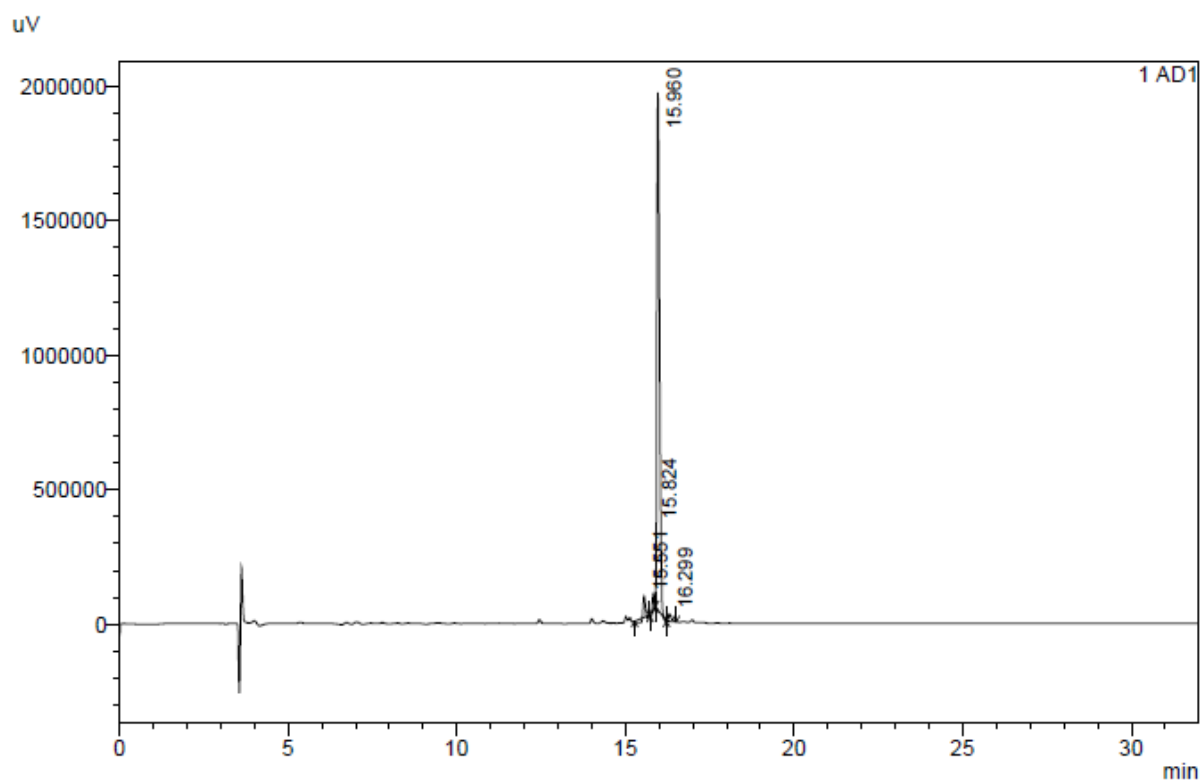

| Peak# | R.Time | I.Time | F.Time | Area     | Height  | A/H   | Conc.  |
|-------|--------|--------|--------|----------|---------|-------|--------|
| 1     | 15.551 | 15.267 | 15.692 | 151905   | 79091   | 1.921 | 1.378  |
| 2     | 15.824 | 15.725 | 15.883 | 194984   | 62106   | 3.140 | 1.769  |
| 3     | 15.960 | 15.883 | 16.208 | 10507916 | 1924112 | 5.461 | 95.344 |
| 4     | 16.299 | 16.208 | 16.500 | 166284   | 28251   | 5.886 | 1.509  |

# Compound 38

uV

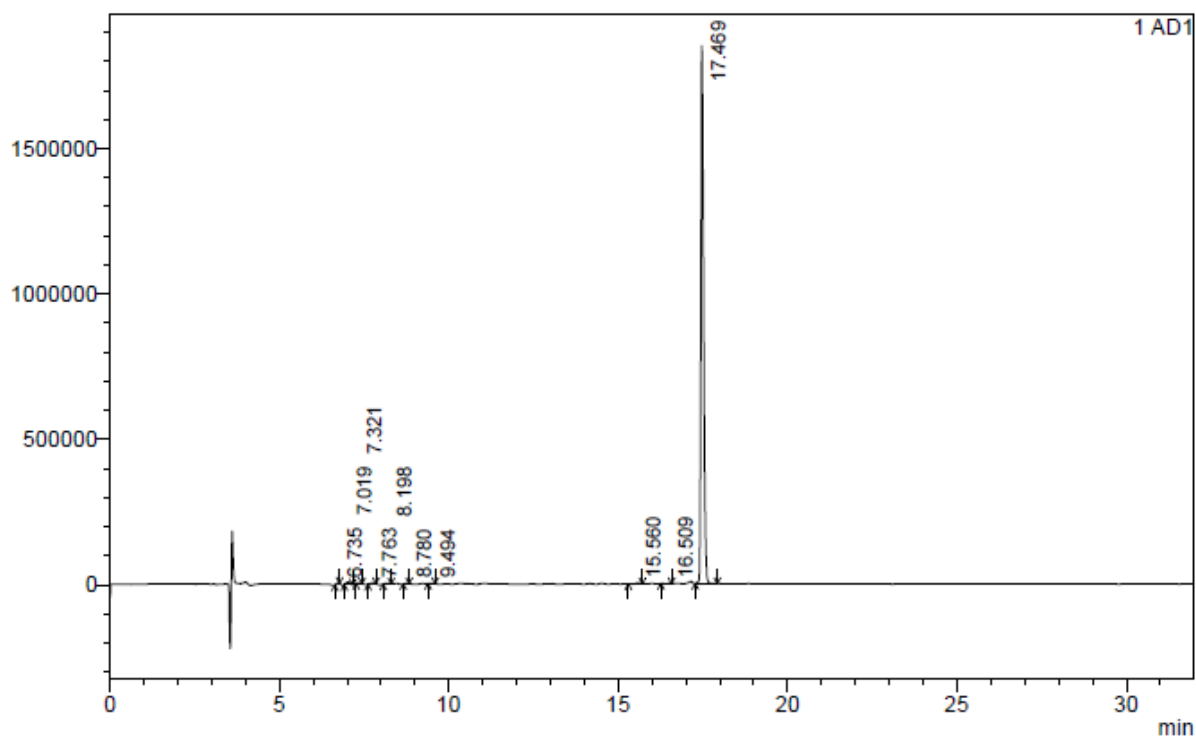

| Peak# | R.Time | I.Time | F.Time | Area     | Height  | A/H   | Conc.  |
|-------|--------|--------|--------|----------|---------|-------|--------|
| 1     | 6.735  | 6.633  | 6.775  | 20956    | 3745    | 5.596 | 0.197  |
| 2     | 7.019  | 6.917  | 7.158  | 77499    | 9219    | 8.406 | 0.727  |
| 3     | 7.321  | 7.258  | 7.433  | 13771    | 2063    | 6.674 | 0.129  |
| 4     | 7.763  | 7.608  | 7.850  | 36488    | 4026    | 9.064 | 0.342  |
| 5     | 8.198  | 8.058  | 8.300  | 21307    | 2231    | 9.549 | 0.200  |
| 6     | 8.780  | 8.650  | 8.825  | 7368     | 849     | 8.679 | 0.069  |
| 7     | 9.494  | 9.383  | 9.592  | 6954     | 936     | 7.431 | 0.065  |
| 8     | 15.560 | 15.292 | 15.708 | 6774     | 3350    | 2.022 | 0.064  |
| 9     | 16.509 | 16.258 | 16.575 | 9760     | 2782    | 3.508 | 0.092  |
| 10    | 17.469 | 17.267 | 17.925 | 10463720 | 1849984 | 5.656 | 98.116 |

# Compound 43

uV

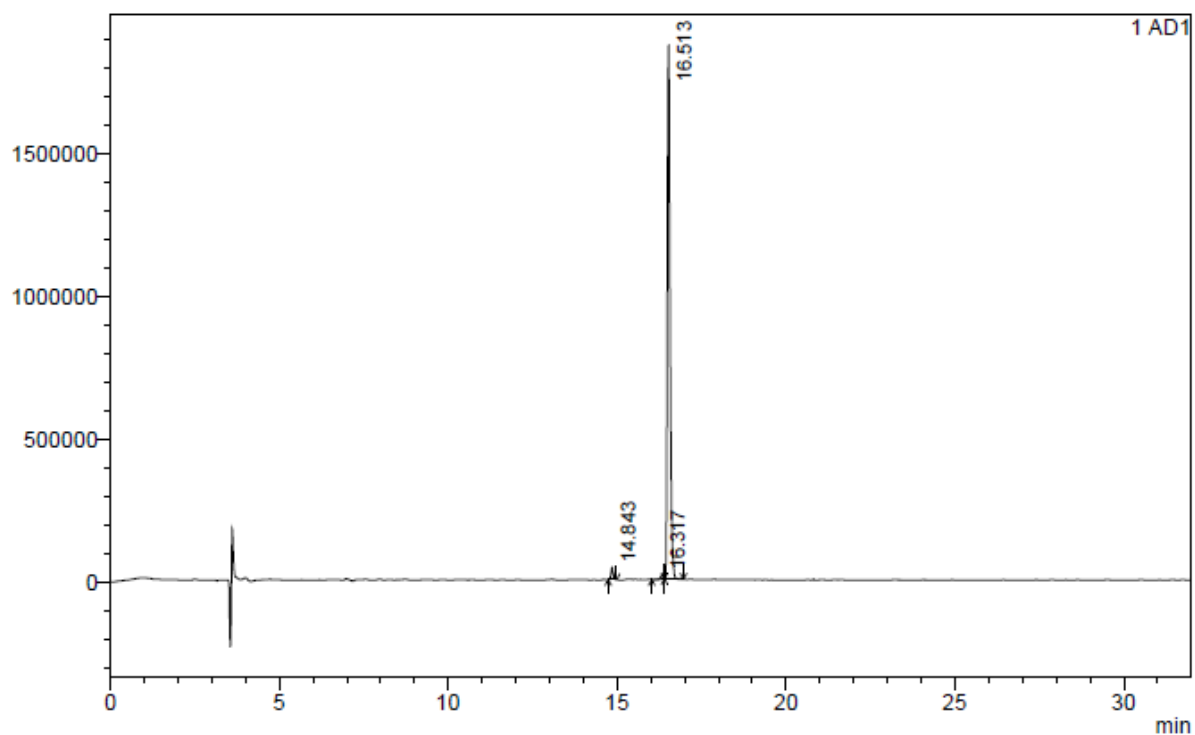

| Peak# | R.Time | I.Time | F.Time | Area     | Height  | A/H   | Conc.  |
|-------|--------|--------|--------|----------|---------|-------|--------|
| 1     | 14.843 | 14.733 | 14.975 | 198400   | 42476   | 4.671 | 1.793  |
| 2     | 16.317 | 16.017 | 16.400 | 50296    | 13012   | 3.865 | 0.455  |
| 3     | 16.513 | 16.400 | 16.958 | 10813807 | 1870089 | 5.783 | 97.752 |

# Compound 44

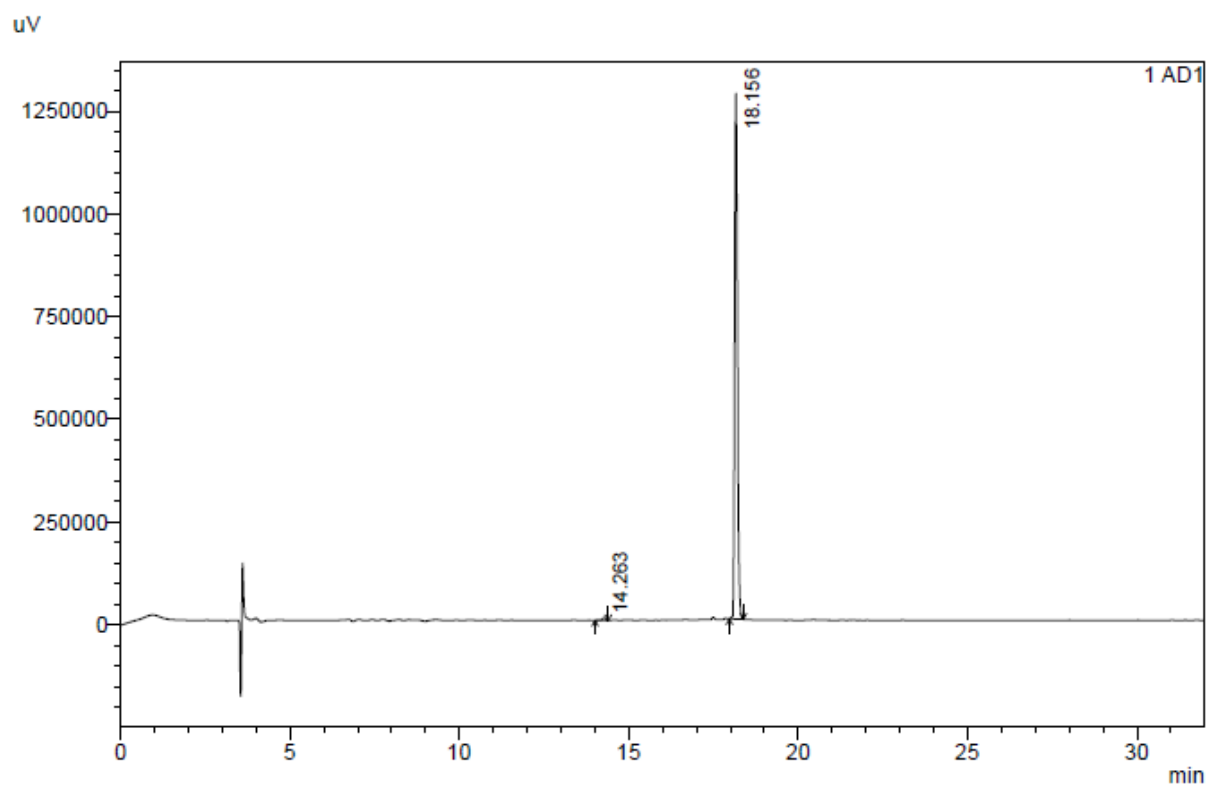

| Peak# | R.Time | I.Time | F.Time | Area    | Height  | A/H   | Conc.  |
|-------|--------|--------|--------|---------|---------|-------|--------|
| 1     | 14.263 | 14.000 | 14.383 | 42465   | 5853    | 7.255 | 0.586  |
| 2     | 18.156 | 17.967 | 18.383 | 7208937 | 1280203 | 5.631 | 99.414 |

## Sources of bacterial strains

Leiden University Medical Center (LUMC), Department of Medical Microbiology,  
Albinusdreef 2, 2333 ZA Leiden, The Netherlands

*A. baumannii* ATCC 17978

*E.coli* ATCC 25922

*K. pneumoniae* ATCC 13883

*P. aeruginosa* ATCC 27853

Utrecht University Medical Center (UMC), Microbiology department, Heidelberglaan 100,  
3584 CX Utrecht, The Netherlands

*E.coli* BW25113

*E.coli* 552060.1

Utrecht University Medical Center (UMC), Clinical Microbiology group, Heidelberglaan 100,  
3584 CX Utrecht, The Netherlands

*E.coli* RC00089

Wageningen Bioveterinary Research, Bacteriology and Epidemiology, Houtribweg 39, 8221  
RA Lelystad, The Netherlands

*E. coli* EQASmcr-1 (EQAS 2016 412016126)

*E. coli* EQASmcr-2 (EQAS 2016 KP37)

*E. coli* EQASmcr-3 (EQAS 2017 2013-SQ352)

## References

- (1) Gromyko, A. V., Popov, K. V., Mosoleva, A. P., Streltsov, S. A., Grokhovsky, S. L., Oleinikov, V. A., Zhuze, A. L. (2005) DNA sequence-specific ligands: XII. Synthesis and cytological studies of dimeric hoechst 33258 molecules. *Russ. J. Bioorganic Chem.*, 31 (4), 344–351. DOI: 10.1007/s11171-005-0047-z.
- (2) Akhtar, W. M., Armstrong, R. J., Frost, J. R., Stevenson, N. G., Donohoe, T. J. (2018) Stereoselective Synthesis of Cyclohexanes via an Iridium Catalyzed (5 + 1) Annulation Strategy. *J. Am. Chem. Soc.*, 140 (38), 11916–11920. DOI: 10.1021/jacs.8b07776.
- (3) López-Cortina, S., Medina-Arreguin, A., Hernández-Fernández, E., Berns, S., Guerrero-Alvarez, J., Ordoñez, M., Fernández-Zertuche, M. (2010) Stereochemistry of base-induced cleavage of methoxide ion on cis- and trans-1,4-diphenylphosphorinanium salts. A different behavior with a phenyl substituent. *Tetrahedron*, 66 (32), 6188–6194. DOI: 10.1016/J.TET.2010.05.095.
- (4) Berglund, A. J., Bodner, M. J. Aryl diamidines and prodrugs thereof for treating myotonic dystrophy. U.S. patent US 2013/0281462 A1, 2013.
- (5) Odds, F. C. (2003) Synergy, antagonism, and what the chequerboard puts between them. *J. Antimicrob. Chemother.*, 52 (1), 1–1. DOI: 10.1093/jac/dkg301.
- (6) Amin, K., Dannenfelser, R.-M. (2006) In vitro hemolysis: Guidance for the pharmaceutical scientist. *J. Pharm. Sci.*, 95 (6), 1173–1176. DOI: 10.1002/JPS.20627.
- (7) MacNair, C. R., Stokes, J. M., Carfrae, L. A., Fiebig-Comyn, A. A., Coombes, B. K., Mulvey, M. R., Brown, E. D. (2018) Overcoming mcr-1 mediated colistin resistance with colistin in combination with other antibiotics. *Nat. Commun.*, 9 (2018), 458. DOI: 10.1038/s41467-018-02875-z.
